# Supplementary material for: Tandem-repeat protein domains across the tree of life
Source: PeerJ. 2015 Jan 13;3:e732. doi: 10.7717/peerj.732 (PMC4304861; doi:10.7717/peerj.732)
Supplement: Table S1 — Raw data extracted from SUPERFAMILY for domain analysis [file peerj-03-732-s005.xlsx]

## Sheet: Sheet1
Archaea
Strain	Taxonomy	ARM repeat Genes	TPR Genes	Ank repeat Genes	Total Protein
Acidianus hospitalis W1	Archaea; Crenarchaeota; Thermoprotei; Sulfolobales; Sulfolobaceae; Acidianus; Acidianus hospitalis; Acidianus hospitalis W1	2	3	1	2329
Acidilobus saccharovorans 345-15	Archaea; Crenarchaeota; Thermoprotei; Acidilobales; Acidilobaceae; Acidilobus; Acidilobus saccharovorans; Acidilobus saccharovorans 345-15	0	0	0	1499
Aciduliprofundum boonei T469	Archaea; Euryarchaeota; unclassified Euryarchaeota; Aciduliprofundum; Aciduliprofundum boonei; Aciduliprofundum boonei T469	0	11	0	1544
Aeropyrum pernix K1	Archaea; Crenarchaeota; Thermoprotei; Desulfurococcales; Desulfurococcaceae; Aeropyrum; Aeropyrum pernix; Aeropyrum pernix K1	0	0	0	1700
Archaeoglobus fulgidus DSM 4304	Archaea; Euryarchaeota; Archaeoglobi; Archaeoglobales; Archaeoglobaceae; Archaeoglobus; Archaeoglobus fulgidus; Archaeoglobus fulgidus DSM 4304	2	4	0	2420
Archaeoglobus profundus DSM 5631	Archaea; Euryarchaeota; Archaeoglobi; Archaeoglobales; Archaeoglobaceae; Archaeoglobus; Archaeoglobus profundus; Archaeoglobus profundus DSM 5631	4	3	0	1823
Archaeoglobus veneficus SNP6	Archaea; Euryarchaeota; Archaeoglobi; Archaeoglobales; Archaeoglobaceae; Archaeoglobus; Archaeoglobus veneficus; Archaeoglobus veneficus SNP6	6	6	0	2090
Caldivirga maquilingensis IC-167	Archaea; Crenarchaeota; Thermoprotei; Thermoproteales; Thermoproteaceae; Caldivirga; Caldivirga maquilingensis; Caldivirga maquilingensis IC-167	2	1	0	1963
Candidatus Korarchaeum cryptofilum OPF8	Archaea; Korarchaeota; Candidatus Korarchaeum; Candidatus Korarchaeum cryptofilum; Candidatus Korarchaeum cryptofilum OPF8	1	0	0	1603
Cenarchaeum symbiosum A	Archaea; Thaumarchaeota; Cenarchaeales; Cenarchaeaceae; Cenarchaeum; Cenarchaeum symbiosum; Cenarchaeum symbiosum A	1	7	0	2017
Desulfurococcus fermentans DSM 16532	Archaea; Crenarchaeota; Thermoprotei; Desulfurococcales; Desulfurococcaceae; Desulfurococcus; Desulfurococcus fermentans; Desulfurococcus fermentans DSM 16532	0	0	0	1421
Desulfurococcus kamchatkensis 1221n	Archaea; Crenarchaeota; Thermoprotei; Desulfurococcales; Desulfurococcaceae; Desulfurococcus; Desulfurococcus kamchatkensis; Desulfurococcus kamchatkensis 1221n	0	0	0	1471
Desulfurococcus mucosus DSM 2162	Archaea; Crenarchaeota; Thermoprotei; Desulfurococcales; Desulfurococcaceae; Desulfurococcus; Desulfurococcus mucosus; Desulfurococcus mucosus DSM 2162	0	0	0	1345
Ferroglobus placidus DSM 10642	Archaea; Euryarchaeota; Archaeoglobi; Archaeoglobales; Archaeoglobaceae; Ferroglobus; Ferroglobus placidus; Ferroglobus placidus DSM 10642	1	2	0	2480
Fervidicoccus fontis Kam940	Archaea; Crenarchaeota; Thermoprotei; Fervidicoccales; Fervidicoccaceae; Fervidicoccus; Fervidicoccus fontis; Fervidicoccus fontis Kam940	0	0	0	1385
Halalkalicoccus jeotgali B3	Archaea; Euryarchaeota; Halobacteria; Halobacteriales; Halobacteriaceae; Halalkalicoccus; Halalkalicoccus jeotgali; Halalkalicoccus jeotgali B3	2	1	0	3873
Haloarcula hispanica ATCC 33960	Archaea; Euryarchaeota; Halobacteria; Halobacteriales; Halobacteriaceae; Haloarcula; Haloarcula hispanica; Haloarcula hispanica ATCC 33960	6	1	0	3859
Haloarcula marismortui ATCC 43049	Archaea; Euryarchaeota; Halobacteria; Halobacteriales; Halobacteriaceae; Haloarcula; Haloarcula marismortui; Haloarcula marismortui ATCC 43049	6	1	0	4243
Halobacterium salinarum R1	Archaea; Euryarchaeota; Halobacteria; Halobacteriales; Halobacteriaceae; Halobacterium; Halobacterium salinarum; Halobacterium salinarum R1	4	1	0	2749
Halobacterium sp. NRC-1	Archaea; Euryarchaeota; Halobacteria; Halobacteriales; Halobacteriaceae; Halobacterium; Halobacterium salinarum; Halobacterium sp. NRC-1	3	1	0	2622
Haloferax mediterranei ATCC 33500	Archaea; Euryarchaeota; Halobacteria; Halobacteriales; Halobacteriaceae; Haloferax; Haloferax mediterranei; Haloferax mediterranei ATCC 33500	5	2	0	3863
Haloferax volcanii DS2	Archaea; Euryarchaeota; Halobacteria; Halobacteriales; Halobacteriaceae; Haloferax; Haloferax volcanii; Haloferax volcanii DS2	4	2	0	4015
Halogeometricum borinquense DSM 11551	Archaea; Euryarchaeota; Halobacteria; Halobacteriales; Halobacteriaceae; Halogeometricum; Halogeometricum borinquense; Halogeometricum borinquense DSM 11551	9	1	4	3898
Halomicrobium mukohataei DSM 12286	Archaea; Euryarchaeota; Halobacteria; Halobacteriales; Halobacteriaceae; Halomicrobium; Halomicrobium mukohataei; Halomicrobium mukohataei DSM 12286	11	2	0	3349
halophilic archaeon DL31	Archaea; unclassified Archaea; unclassified Archaea (miscellaneous); halophilic archaeon DL31	2	2	0	3476
Halopiger xanaduensis SH-6	Archaea; Euryarchaeota; Halobacteria; Halobacteriales; Halobacteriaceae; Halopiger; Halopiger xanaduensis; Halopiger xanaduensis SH-6	5	1	0	4221
Haloquadratum walsbyi C23	Archaea; Euryarchaeota; Halobacteria; Halobacteriales; Halobacteriaceae; Haloquadratum; Haloquadratum walsbyi; Haloquadratum walsbyi C23	2	1	0	2743
Haloquadratum walsbyi DSM 16790	Archaea; Euryarchaeota; Halobacteria; Halobacteriales; Halobacteriaceae; Haloquadratum; Haloquadratum walsbyi; Haloquadratum walsbyi DSM 16790	1	2	0	2646
Halorhabdus utahensis DSM 12940	Archaea; Euryarchaeota; Halobacteria; Halobacteriales; Halobacteriaceae; Halorhabdus; Halorhabdus utahensis; Halorhabdus utahensis DSM 12940	8	1	0	2998
Halorubrum lacusprofundi ATCC 49239	Archaea; Euryarchaeota; Halobacteria; Halobacteriales; Halobacteriaceae; Halorubrum; Halorubrum lacusprofundi; Halorubrum lacusprofundi ATCC 49239	3	2	0	3560
Haloterrigena turkmenica DSM 5511	Archaea; Euryarchaeota; Halobacteria; Halobacteriales; Halobacteriaceae; Haloterrigena; Haloterrigena turkmenica; Haloterrigena turkmenica DSM 5511	5	1	0	5113
Hyperthermus butylicus DSM 5456	Archaea; Crenarchaeota; Thermoprotei; Desulfurococcales; Pyrodictiaceae; Hyperthermus; Hyperthermus butylicus; Hyperthermus butylicus DSM 5456	0	0	0	1603
Ignicoccus hospitalis KIN4/I	Archaea; Crenarchaeota; Thermoprotei; Desulfurococcales; Desulfurococcaceae; Ignicoccus; Ignicoccus hospitalis; Ignicoccus hospitalis KIN4/I	0	0	0	1434
Ignisphaera aggregans DSM 17230	Archaea; Crenarchaeota; Thermoprotei; Desulfurococcales; Desulfurococcaceae; Ignisphaera; Ignisphaera aggregans; Ignisphaera aggregans DSM 17230	0	0	0	1930
Metallosphaera cuprina Ar-4	Archaea; Crenarchaeota; Thermoprotei; Sulfolobales; Sulfolobaceae; Metallosphaera; Metallosphaera cuprina; Metallosphaera cuprina Ar-4	2	3	1	2029
Metallosphaera sedula DSM 5348	Archaea; Crenarchaeota; Thermoprotei; Sulfolobales; Sulfolobaceae; Metallosphaera; Metallosphaera sedula; Metallosphaera sedula DSM 5348	3	3	0	2256
Methanobacterium sp. AL-21	Archaea; Euryarchaeota; Methanobacteria; Methanobacteriales; Methanobacteriaceae; Methanobacterium; Methanobacterium sp. AL-21	10	10	0	2493
Methanobacterium sp. SWAN-1	Archaea; Euryarchaeota; Methanobacteria; Methanobacteriales; Methanobacteriaceae; Methanobacterium; Methanobacterium sp. SWAN-1	10	17	0	2397
Methanobrevibacter ruminantium M1	Archaea; Euryarchaeota; Methanobacteria; Methanobacteriales; Methanobacteriaceae; Methanobrevibacter; Methanobrevibacter ruminantium; Methanobrevibacter ruminantium M1	7	18	0	2217
Methanobrevibacter smithii ATCC 35061	Archaea; Euryarchaeota; Methanobacteria; Methanobacteriales; Methanobacteriaceae; Methanobrevibacter; Methanobrevibacter smithii; Methanobrevibacter smithii ATCC 35061	2	14	0	1793
Methanocaldococcus fervens AG86	Archaea; Euryarchaeota; Methanococci; Methanococcales; Methanocaldococcaceae; Methanocaldococcus; Methanocaldococcus fervens; Methanocaldococcus fervens AG86	2	7	0	1581
methanocaldococcus infernus ME	Archaea; Euryarchaeota; Methanococci; Methanococcales; Methanocaldococcaceae; Methanocaldococcus; Methanocaldococcus infernus; Methanocaldococcus infernus ME	2	6	0	1441
Methanocaldococcus jannaschii DSM 2661	Archaea; Euryarchaeota; Methanococci; Methanococcales; Methanocaldococcaceae; Methanocaldococcus; Methanocaldococcus jannaschii; Methanocaldococcus jannaschii DSM 2661	4	10	0	1771
Methanocaldococcus sp. FS406-22	Archaea; Euryarchaeota; Methanococci; Methanococcales; Methanocaldococcaceae; Methanocaldococcus; Methanocaldococcus sp. FS406-22	5	12	0	1816
Methanocaldococcus vulcanius M7	Archaea; Euryarchaeota; Methanococci; Methanococcales; Methanocaldococcaceae; Methanocaldococcus; Methanocaldococcus vulcanius; Methanocaldococcus vulcanius M7	3	9	0	1742
Methanocella arvoryzae MRE50	Archaea; Euryarchaeota; Methanomicrobia; Methanocellales; Methanocellaceae; Methanocella; Methanocella arvoryzae; Methanocella arvoryzae MRE50	15	23	0	3089
Methanocella conradii HZ254	Archaea; Euryarchaeota; Methanomicrobia; Methanocellales; Methanocellaceae; Methanocella; Methanocella conradii; Methanocella conradii HZ254	5	15	0	2455
Methanocella paludicola SANAE	Archaea; Euryarchaeota; Methanomicrobia; Methanocellales; Methanocellaceae; Methanocella; Methanocella paludicola; Methanocella paludicola SANAE	13	29	2	3004
Methanococcoides burtonii DSM 6242	Archaea; Euryarchaeota; Methanomicrobia; Methanosarcinales; Methanosarcinaceae; Methanococcoides; Methanococcoides burtonii; Methanococcoides burtonii DSM 6242	4	9	0	2273
Methanococcus aeolicus Nankai-3	Archaea; Euryarchaeota; Methanococci; Methanococcales; Methanococcaceae; Methanococcus; Methanococcus aeolicus; Methanococcus aeolicus Nankai-3	0	5	1	1490
Methanococcus maripaludis C5	Archaea; Euryarchaeota; Methanococci; Methanococcales; Methanococcaceae; Methanococcus; Methanococcus maripaludis; Methanococcus maripaludis C5	5	8	0	1822
Methanococcus maripaludis C6	Archaea; Euryarchaeota; Methanococci; Methanococcales; Methanococcaceae; Methanococcus; Methanococcus maripaludis; Methanococcus maripaludis C6	4	8	0	1826
Methanococcus maripaludis C7	Archaea; Euryarchaeota; Methanococci; Methanococcales; Methanococcaceae; Methanococcus; Methanococcus maripaludis; Methanococcus maripaludis C7	5	8	0	1788
Methanococcus maripaludis S2	Archaea; Euryarchaeota; Methanococci; Methanococcales; Methanococcaceae; Methanococcus; Methanococcus maripaludis; Methanococcus maripaludis S2	6	7	0	1722
Methanococcus maripaludis X1	Archaea; Euryarchaeota; Methanococci; Methanococcales; Methanococcaceae; Methanococcus; Methanococcus maripaludis; Methanococcus maripaludis X1	5	9	0	1848
Methanococcus vannielii SB	Archaea; Euryarchaeota; Methanococci; Methanococcales; Methanococcaceae; Methanococcus; Methanococcus vannielii; Methanococcus vannielii SB	5	9	0	1678
Methanococcus voltae A3	Archaea; Euryarchaeota; Methanococci; Methanococcales; Methanococcaceae; Methanococcus; Methanococcus voltae; Methanococcus voltae A3	4	7	0	1717
Methanocorpusculum labreanum Z	Archaea; Euryarchaeota; Methanomicrobia; Methanomicrobiales; Methanocorpusculaceae; Methanocorpusculum; Methanocorpusculum labreanum; Methanocorpusculum labreanum Z	6	12	0	1741
Methanoculleus bourgensis MS2	Archaea; Euryarchaeota; Methanomicrobia; Methanomicrobiales; Methanomicrobiaceae; Methanoculleus; Methanoculleus bourgensis; Methanoculleus bourgensis MS2	19	9	0	2619
Methanoculleus marisnigri JR1	Archaea; Euryarchaeota; Methanomicrobia; Methanomicrobiales; Methanomicrobiaceae; Methanoculleus; Methanoculleus marisnigri; Methanoculleus marisnigri JR1	17	7	0	2490
Methanohalobium evestigatum Z-7303	Archaea; Euryarchaeota; Methanomicrobia; Methanosarcinales; Methanosarcinaceae; Methanohalobium; Methanohalobium evestigatum; Methanohalobium evestigatum Z-7303	1	7	0	2254
Methanohalophilus mahii DSM 5219	Archaea; Euryarchaeota; Methanomicrobia; Methanosarcinales; Methanosarcinaceae; Methanohalophilus; Methanohalophilus mahii; Methanohalophilus mahii DSM 5219	2	5	0	1987
Methanoplanus petrolearius DSM 11571	Archaea; Euryarchaeota; Methanomicrobia; Methanomicrobiales; Methanomicrobiaceae; Methanoplanus; Methanoplanus petrolearius; Methanoplanus petrolearius DSM 11571	9	11	0	2785
Methanopyrus kandleri AV19	Archaea; Euryarchaeota; Methanopyri; Methanopyrales; Methanopyraceae; Methanopyrus; Methanopyrus kandleri; Methanopyrus kandleri AV19	0	0	0	1687
Methanoregula boonei 6A8	Archaea; Euryarchaeota; Methanomicrobia; Methanomicrobiales; Methanoregulaceae; Methanoregula; Methanoregula boonei; Methanoregula boonei 6A8	9	17	0	2452
Methanosaeta concilii GP6	Archaea; Euryarchaeota; Methanomicrobia; Methanosarcinales; Methanosaetaceae; Methanosaeta; Methanosaeta concilii; Methanosaeta concilii GP6	5	33	0	2850
Methanosaeta harundinacea 6Ac	Archaea; Euryarchaeota; Methanomicrobia; Methanosarcinales; Methanosaetaceae; Methanosaeta; Methanosaeta harundinacea; Methanosaeta harundinacea 6Ac	8	25	0	2371
Methanosaeta thermophila PT	Archaea; Euryarchaeota; Methanomicrobia; Methanosarcinales; Methanosaetaceae; Methanosaeta; Methanosaeta thermophila; Methanosaeta thermophila PT	5	5	0	1696
Methanosalsum zhilinae DSM 4017	Archaea; Euryarchaeota; Methanomicrobia; Methanosarcinales; Methanosarcinaceae; Methanosalsum; Methanosalsum zhilinae; Methanosalsum zhilinae DSM 4017	1	4	0	1976
Methanosarcina acetivorans C2A	Archaea; Euryarchaeota; Methanomicrobia; Methanosarcinales; Methanosarcinaceae; Methanosarcina; Methanosarcina acetivorans; Methanosarcina acetivorans C2A	13	35	0	4540
Methanosarcina barkeri str. Fusaro	Archaea; Euryarchaeota; Methanomicrobia; Methanosarcinales; Methanosarcinaceae; Methanosarcina; Methanosarcina barkeri; Methanosarcina barkeri str. Fusaro	15	28	1	3625
Methanosarcina mazei Go1	Archaea; Euryarchaeota; Methanomicrobia; Methanosarcinales; Methanosarcinaceae; Methanosarcina; Methanosarcina mazei; Methanosarcina mazei Go1	11	21	1	3368
Methanosphaera stadtmanae DSM 3091	Archaea; Euryarchaeota; Methanobacteria; Methanobacteriales; Methanobacteriaceae; Methanosphaera; Methanosphaera stadtmanae; Methanosphaera stadtmanae DSM 3091	2	1	0	1535
Methanosphaerula palustris E1-9c	Archaea; Euryarchaeota; Methanomicrobia; Methanomicrobiales; Methanoregulaceae; Methanosphaerula; Methanosphaerula palustris; Methanosphaerula palustris E1-9c	7	13	0	2655
Methanospirillum hungatei JF-1	Archaea; Euryarchaeota; Methanomicrobia; Methanomicrobiales; Methanospirillaceae; Methanospirillum; Methanospirillum hungatei; Methanospirillum hungatei JF-1	6	56	0	3131
Methanothermobacter marburgensis str. Marburg	Archaea; Euryarchaeota; Methanobacteria; Methanobacteriales; Methanobacteriaceae; Methanothermobacter; Methanothermobacter marburgensis; Methanothermobacter marburgensis str. Marburg	4	7	0	1757
Methanothermobacter thermautotrophicus str. Delta H	Archaea; Euryarchaeota; Methanobacteria; Methanobacteriales; Methanobacteriaceae; Methanothermobacter; Methanothermobacter thermautotrophicus; Methanothermobacter thermautotrophicus str. Delta H	6	7	0	1873
Methanothermococcus okinawensis IH1	Archaea; Euryarchaeota; Methanococci; Methanococcales; Methanococcaceae; Methanothermococcus; Methanothermococcus okinawensis; Methanothermococcus okinawensis IH1	4	4	1	1595
Methanothermus fervidus DSM 2088	Archaea; Euryarchaeota; Methanobacteria; Methanobacteriales; Methanothermaceae; Methanothermus; Methanothermus fervidus; Methanothermus fervidus DSM 2088	1	3	0	1283
Methanotorris igneus Kol 5	Archaea; Euryarchaeota; Methanococci; Methanococcales; Methanocaldococcaceae; Methanotorris; Methanotorris igneus; Methanotorris igneus Kol 5	4	5	0	1772
Nanoarchaeum equitans Kin4-M	Archaea; Nanoarchaeota; Nanoarchaeum; Nanoarchaeum equitans; Nanoarchaeum equitans Kin4-M	0	0	0	540
Natrialba magadii ATCC 43099	Archaea; Euryarchaeota; Halobacteria; Halobacteriales; Halobacteriaceae; Natrialba; Natrialba magadii; Natrialba magadii ATCC 43099	3	2	0	4212
Natrinema sp. J7-2	Archaea; Euryarchaeota; Halobacteria; Halobacteriales; Halobacteriaceae; Natrinema; Natrinema sp. J7-2	10	1	0	4302
Natronomonas pharaonis DSM 2160	Archaea; Euryarchaeota; Halobacteria; Halobacteriales; Halobacteriaceae; Natronomonas; Natronomonas pharaonis; Natronomonas pharaonis DSM 2160	4	2	0	2820
Nitrosopumilus maritimus SCM1	Archaea; Thaumarchaeota; Nitrosopumilales; Nitrosopumilaceae; Nitrosopumilus; Nitrosopumilus maritimus; Nitrosopumilus maritimus SCM1	4	12	0	1796
Picrophilus torridus DSM 9790	Archaea; Euryarchaeota; Thermoplasmata; Thermoplasmatales; Picrophilaceae; Picrophilus; Picrophilus torridus; Picrophilus torridus DSM 9790	1	3	0	1537
Pyrobaculum aerophilum str. IM2	Archaea; Crenarchaeota; Thermoprotei; Thermoproteales; Thermoproteaceae; Pyrobaculum; Pyrobaculum aerophilum; Pyrobaculum aerophilum str. IM2	1	0	1	2604
Pyrobaculum arsenaticum DSM 13514	Archaea; Crenarchaeota; Thermoprotei; Thermoproteales; Thermoproteaceae; Pyrobaculum; Pyrobaculum arsenaticum; Pyrobaculum arsenaticum DSM 13514	1	1	1	2299
Pyrobaculum calidifontis JCM 11548	Archaea; Crenarchaeota; Thermoprotei; Thermoproteales; Thermoproteaceae; Pyrobaculum; Pyrobaculum calidifontis; Pyrobaculum calidifontis JCM 11548	1	0	0	2152
Pyrobaculum islandicum DSM 4184	Archaea; Crenarchaeota; Thermoprotei; Thermoproteales; Thermoproteaceae; Pyrobaculum; Pyrobaculum islandicum; Pyrobaculum islandicum DSM 4184	1	0	0	1978
Pyrobaculum oguniense TE7	Archaea; Crenarchaeota; Thermoprotei; Thermoproteales; Thermoproteaceae; Pyrobaculum; Pyrobaculum oguniense; Pyrobaculum oguniense TE7	1	1	6	2835
Pyrobaculum sp. 1860	Archaea; Crenarchaeota; Thermoprotei; Thermoproteales; Thermoproteaceae; Pyrobaculum; Pyrobaculum sp. 1860	1	1	0	2824
Pyrococcus abyssi GE5	Archaea; Euryarchaeota; Thermococci; Thermococcales; Thermococcaceae; Pyrococcus; Pyrococcus abyssi; Pyrococcus abyssi GE5	4	5	0	1781
Pyrococcus furiosus COM1	Archaea; Euryarchaeota; Thermococci; Thermococcales; Thermococcaceae; Pyrococcus; Pyrococcus furiosus; Pyrococcus furiosus COM1	5	5	0	2064
Pyrococcus furiosus DSM 3638	Archaea; Euryarchaeota; Thermococci; Thermococcales; Thermococcaceae; Pyrococcus; Pyrococcus furiosus; Pyrococcus furiosus DSM 3638	5	5	0	2122
Pyrococcus horikoshii OT3	Archaea; Euryarchaeota; Thermococci; Thermococcales; Thermococcaceae; Pyrococcus; Pyrococcus horikoshii; Pyrococcus horikoshii OT3	4	6	0	1950
Pyrococcus sp. NA2	Archaea; Euryarchaeota; Thermococci; Thermococcales; Thermococcaceae; Pyrococcus; Pyrococcus sp. NA2	4	5	0	1980
Pyrococcus sp. ST04	Archaea; Euryarchaeota; Thermococci; Thermococcales; Thermococcaceae; Pyrococcus; Pyrococcus sp. ST04	4	6	0	1748
Pyrococcus yayanosii CH1	Archaea; Euryarchaeota; Thermococci; Thermococcales; Thermococcaceae; Pyrococcus; Pyrococcus yayanosii; Pyrococcus yayanosii CH1	4	8	0	1865
Pyrolobus fumarii 1A	Archaea; Crenarchaeota; Thermoprotei; Desulfurococcales; Pyrodictiaceae; Pyrolobus; Pyrolobus fumarii; Pyrolobus fumarii 1A	1	0	0	1967
Staphylothermus hellenicus DSM 12710	Archaea; Crenarchaeota; Thermoprotei; Desulfurococcales; Desulfurococcaceae; Staphylothermus; Staphylothermus hellenicus; Staphylothermus hellenicus DSM 12710	0	2	0	1599
Staphylothermus marinus F1	Archaea; Crenarchaeota; Thermoprotei; Desulfurococcales; Desulfurococcaceae; Staphylothermus; Staphylothermus marinus; Staphylothermus marinus F1	0	2	0	1573
Sulfolobus acidocaldarius DSM 639	Archaea; Crenarchaeota; Thermoprotei; Sulfolobales; Sulfolobaceae; Sulfolobus; Sulfolobus acidocaldarius; Sulfolobus acidocaldarius DSM 639	0	4	0	2224
Sulfolobus islandicus HVE10/4	Archaea; Crenarchaeota; Thermoprotei; Sulfolobales; Sulfolobaceae; Sulfolobus; Sulfolobus islandicus; Sulfolobus islandicus HVE10/4	1	5	0	2720
Sulfolobus islandicus L.D.8.5	Archaea; Crenarchaeota; Thermoprotei; Sulfolobales; Sulfolobaceae; Sulfolobus; Sulfolobus islandicus; Sulfolobus islandicus L.D.8.5	1	5	0	2948
Sulfolobus islandicus L.S.2.15	Archaea; Crenarchaeota; Thermoprotei; Sulfolobales; Sulfolobaceae; Sulfolobus; Sulfolobus islandicus; Sulfolobus islandicus L.S.2.15	1	5	0	2737
Sulfolobus islandicus M.14.25	Archaea; Crenarchaeota; Thermoprotei; Sulfolobales; Sulfolobaceae; Sulfolobus; Sulfolobus islandicus; Sulfolobus islandicus M.14.25	2	6	0	2608
Sulfolobus islandicus M.16.27	Archaea; Crenarchaeota; Thermoprotei; Sulfolobales; Sulfolobaceae; Sulfolobus; Sulfolobus islandicus; Sulfolobus islandicus M.16.27	2	6	0	2657
Sulfolobus islandicus M.16.4	Archaea; Crenarchaeota; Thermoprotei; Sulfolobales; Sulfolobaceae; Sulfolobus; Sulfolobus islandicus; Sulfolobus islandicus M.16.4	1	5	0	2735
Sulfolobus islandicus REY15A	Archaea; Crenarchaeota; Thermoprotei; Sulfolobales; Sulfolobaceae; Sulfolobus; Sulfolobus islandicus; Sulfolobus islandicus REY15A	1	5	0	2644
Sulfolobus islandicus Y.G.57.14	Archaea; Crenarchaeota; Thermoprotei; Sulfolobales; Sulfolobaceae; Sulfolobus; Sulfolobus islandicus; Sulfolobus islandicus Y.G.57.14	2	6	0	2903
Sulfolobus islandicus Y.N.15.51	Archaea; Crenarchaeota; Thermoprotei; Sulfolobales; Sulfolobaceae; Sulfolobus; Sulfolobus islandicus; Sulfolobus islandicus Y.N.15.51	2	6	2	2900
Sulfolobus solfataricus 98/2	Archaea; Crenarchaeota; Thermoprotei; Sulfolobales; Sulfolobaceae; Sulfolobus; Sulfolobus solfataricus; Sulfolobus solfataricus 98/2	0	4	0	2679
Sulfolobus solfataricus P2	Archaea; Crenarchaeota; Thermoprotei; Sulfolobales; Sulfolobaceae; Sulfolobus; Sulfolobus solfataricus; Sulfolobus solfataricus P2	0	4	0	2978
Sulfolobus tokodaii str. 7	Archaea; Crenarchaeota; Thermoprotei; Sulfolobales; Sulfolobaceae; Sulfolobus; Sulfolobus tokodaii; Sulfolobus tokodaii str. 7	1	6	0	2826
Thermococcus barophilus MP	Archaea; Euryarchaeota; Thermococci; Thermococcales; Thermococcaceae; Thermococcus; Thermococcus barophilus; Thermococcus barophilus MP	2	11	0	2265
Thermococcus gammatolerans EJ3	Archaea; Euryarchaeota; Thermococci; Thermococcales; Thermococcaceae; Thermococcus; Thermococcus gammatolerans; Thermococcus gammatolerans EJ3	4	11	0	2156
Thermococcus kodakarensis KOD1	Archaea; Euryarchaeota; Thermococci; Thermococcales; Thermococcaceae; Thermococcus; Thermococcus kodakarensis; Thermococcus kodakarensis KOD1	5	8	0	2306
Thermococcus onnurineus NA1	Archaea; Euryarchaeota; Thermococci; Thermococcales; Thermococcaceae; Thermococcus; Thermococcus onnurineus; Thermococcus onnurineus NA1	4	8	0	1975
Thermococcus sibiricus MM 739	Archaea; Euryarchaeota; Thermococci; Thermococcales; Thermococcaceae; Thermococcus; Thermococcus sibiricus; Thermococcus sibiricus MM 739	1	7	0	2035
Thermococcus sp. 4557	Archaea; Euryarchaeota; Thermococci; Thermococcales; Thermococcaceae; Thermococcus; Thermococcus sp. 4557	2	9	0	2133
Thermococcus sp. AM4	Archaea; Euryarchaeota; Thermococci; Thermococcales; Thermococcaceae; Thermococcus; Thermococcus sp. AM4	3	11	0	2222
Thermococcus sp. CL1	Archaea; Euryarchaeota; Thermococci; Thermococcales; Thermococcaceae; Thermococcus; Thermococcus sp. CL1	2	8	0	2017
Thermofilum pendens Hrk 5	Archaea; Crenarchaeota; Thermoprotei; Thermoproteales; Thermofilaceae; Thermofilum; Thermofilum pendens; Thermofilum pendens Hrk 5	1	2	1	1878
Thermogladius cellulolyticus 1633	Archaea; Crenarchaeota; Thermoprotei; Desulfurococcales; Desulfurococcaceae; Thermogladius; Thermogladius cellulolyticus; Thermogladius cellulolyticus 1633	0	0	0	1413
Thermoplasma acidophilum DSM 1728	Archaea; Euryarchaeota; Thermoplasmata; Thermoplasmatales; Thermoplasmataceae; Thermoplasma; Thermoplasma acidophilum; Thermoplasma acidophilum DSM 1728	0	5	1	1484
Thermoplasma volcanium GSS1	Archaea; Euryarchaeota; Thermoplasmata; Thermoplasmatales; Thermoplasmataceae; Thermoplasma; Thermoplasma volcanium; Thermoplasma volcanium GSS1	0	6	1	1501
Thermoproteus neutrophilus V24Sta	Archaea; Crenarchaeota; Thermoprotei; Thermoproteales; Thermoproteaceae; Pyrobaculum; Pyrobaculum neutrophilum; Pyrobaculum neutrophilum V24Sta	1	0	0	1966
Thermoproteus tenax Kra 1	Archaea; Crenarchaeota; Thermoprotei; Thermoproteales; Thermoproteaceae; Thermoproteus; Thermoproteus tenax; Thermoproteus tenax Kra 1	1	0	0	2049
Thermoproteus uzoniensis 768-20	Archaea; Crenarchaeota; Thermoprotei; Thermoproteales; Thermoproteaceae; Thermoproteus; Thermoproteus uzoniensis; Thermoproteus uzoniensis 768-20	1	0	0	2186
Thermosphaera aggregans DSM 11486	Archaea; Crenarchaeota; Thermoprotei; Desulfurococcales; Desulfurococcaceae; Thermosphaera; Thermosphaera aggregans; Thermosphaera aggregans DSM 11486	0	0	0	1387
Vulcanisaeta distributa DSM 14429	Archaea; Crenarchaeota; Thermoprotei; Thermoproteales; Thermoproteaceae; Vulcanisaeta; Vulcanisaeta distributa; Vulcanisaeta distributa DSM 14429	1	1	0	2493
Vulcanisaeta moutnovskia 768-28	Archaea; Crenarchaeota; Thermoprotei; Thermoproteales; Thermoproteaceae; Vulcanisaeta; Vulcanisaeta moutnovskia; Vulcanisaeta moutnovskia 768-28	1	2	0	2320
Bacteria
Strain	Taxonomy	ARM repeat Genes	TPR Genes	Ank repeat Genes	Total Protein
Acaryochloris marina MBIC11017	Bacteria; Cyanobacteria; Chroococcales; Acaryochloris; Acaryochloris marina; Acaryochloris marina MBIC11017	18	113	12	8383
Acetobacter pasteurianus IFO 3283-01	Bacteria; Proteobacteria; Alphaproteobacteria; Rhodospirillales; Acetobacteraceae; Acetobacter; Acetobacter pasteurianus; Acetobacter pasteurianus IFO 3283-01	1	13	2	3049
Acetobacter pasteurianus IFO 3283-01-42C	Bacteria; Proteobacteria; Alphaproteobacteria; Rhodospirillales; Acetobacteraceae; Acetobacter; Acetobacter pasteurianus; Acetobacter pasteurianus IFO 3283-01-42C	1	13	2	2984
Acetobacter pasteurianus IFO 3283-03	Bacteria; Proteobacteria; Alphaproteobacteria; Rhodospirillales; Acetobacteraceae; Acetobacter; Acetobacter pasteurianus; Acetobacter pasteurianus IFO 3283-03	1	13	2	3048
Acetobacter pasteurianus IFO 3283-07	Bacteria; Proteobacteria; Alphaproteobacteria; Rhodospirillales; Acetobacteraceae; Acetobacter; Acetobacter pasteurianus; Acetobacter pasteurianus IFO 3283-07	1	13	2	3047
Acetobacter pasteurianus IFO 3283-12	Bacteria; Proteobacteria; Alphaproteobacteria; Rhodospirillales; Acetobacteraceae; Acetobacter; Acetobacter pasteurianus; Acetobacter pasteurianus IFO 3283-12	1	13	2	3046
Acetobacter pasteurianus IFO 3283-22	Bacteria; Proteobacteria; Alphaproteobacteria; Rhodospirillales; Acetobacteraceae; Acetobacter; Acetobacter pasteurianus; Acetobacter pasteurianus IFO 3283-22	1	13	2	3048
Acetobacter pasteurianus IFO 3283-26	Bacteria; Proteobacteria; Alphaproteobacteria; Rhodospirillales; Acetobacteraceae; Acetobacter; Acetobacter pasteurianus; Acetobacter pasteurianus IFO 3283-26	1	13	2	3048
Acetobacter pasteurianus IFO 3283-32	Bacteria; Proteobacteria; Alphaproteobacteria; Rhodospirillales; Acetobacteraceae; Acetobacter; Acetobacter pasteurianus; Acetobacter pasteurianus IFO 3283-32	1	13	2	3046
Acetobacterium woodii DSM 1030	Bacteria; Firmicutes; Clostridia; Clostridiales; Eubacteriaceae; Acetobacterium; Acetobacterium woodii; Acetobacterium woodii DSM 1030	2	8	0	3473
Acetohalobium arabaticum DSM 5501	Bacteria; Firmicutes; Clostridia; Halanaerobiales; Halobacteroidaceae; Acetohalobium; Acetohalobium arabaticum; Acetohalobium arabaticum DSM 5501	2	10	3	2282
Acholeplasma laidlawii PG-8A	Bacteria; Tenericutes; Mollicutes; Acholeplasmatales; Acholeplasmataceae; Acholeplasma; Acholeplasma laidlawii; Acholeplasma laidlawii PG-8A	2	1	1	1380
Achromobacter xylosoxidans A8	Bacteria; Proteobacteria; Betaproteobacteria; Burkholderiales; Alcaligenaceae; Achromobacter; Achromobacter xylosoxidans; Achromobacter xylosoxidans A8	2	23	3	6815
Acidaminococcus fermentans DSM 20731	Bacteria; Firmicutes; Negativicutes; Selenomonadales; Acidaminococcaceae; Acidaminococcus; Acidaminococcus fermentans; Acidaminococcus fermentans DSM 20731	1	3	0	2026
Acidaminococcus intestini RyC-MR95	Bacteria; Firmicutes; Negativicutes; Selenomonadales; Acidaminococcaceae; Acidaminococcus; Acidaminococcus intestini; Acidaminococcus intestini RyC-MR95	0	5	0	2401
Acidimicrobium ferrooxidans DSM 10331	Bacteria; Actinobacteria; Actinobacteria; Acidimicrobidae; Acidimicrobiales; Acidimicrobineae; Acidimicrobiaceae; Acidimicrobium; Acidimicrobium ferrooxidans; Acidimicrobium ferrooxidans DSM 10331	1	3	0	1964
Acidiphilium cryptum JF-5	Bacteria; Proteobacteria; Alphaproteobacteria; Rhodospirillales; Acetobacteraceae; Acidiphilium; Acidiphilium cryptum; Acidiphilium cryptum JF-5	0	18	1	3559
Acidiphilium multivorum AIU301	Bacteria; Proteobacteria; Alphaproteobacteria; Rhodospirillales; Acetobacteraceae; Acidiphilium; Acidiphilium multivorum; Acidiphilium multivorum AIU301	0	18	1	3948
Acidithiobacillus caldus SM-1	Bacteria; Proteobacteria; Gammaproteobacteria; Acidithiobacillales; Acidithiobacillaceae; Acidithiobacillus; Acidithiobacillus caldus; Acidithiobacillus caldus SM-1	4	17	0	3187
Acidithiobacillus ferrivorans SS3	Bacteria; Proteobacteria; Gammaproteobacteria; Acidithiobacillales; Acidithiobacillaceae; Acidithiobacillus; Acidithiobacillus ferrivorans; Acidithiobacillus ferrivorans SS3	4	16	1	3093
Acidithiobacillus ferrooxidans ATCC 23270	Bacteria; Proteobacteria; Gammaproteobacteria; Acidithiobacillales; Acidithiobacillaceae; Acidithiobacillus; Acidithiobacillus ferrooxidans; Acidithiobacillus ferrooxidans ATCC 23270	1	23	1	3147
Acidithiobacillus ferrooxidans ATCC 53993	Bacteria; Proteobacteria; Gammaproteobacteria; Acidithiobacillales; Acidithiobacillaceae; Acidithiobacillus; Acidithiobacillus ferrooxidans; Acidithiobacillus ferrooxidans ATCC 53993	1	20	1	2826
Acidobacterium capsulatum ATCC 51196	Bacteria; Fibrobacteres/Acidobacteria group; Acidobacteria; Acidobacteriia; Acidobacteriales; Acidobacteriaceae; Acidobacterium; Acidobacterium capsulatum; Acidobacterium capsulatum ATCC 51196	1	40	1	3377
Acidothermus cellulolyticus 11B	Bacteria; Actinobacteria; Actinobacteria; Actinobacteridae; Actinomycetales; Frankineae; Acidothermaceae; Acidothermus; Acidothermus cellulolyticus; Acidothermus cellulolyticus 11B	1	8	0	2157
Acidovorax avenae subsp. avenae ATCC 19860	Bacteria; Proteobacteria; Betaproteobacteria; Burkholderiales; Comamonadaceae; Acidovorax; Acidovorax avenae; Acidovorax avenae subsp. avenae; Acidovorax avenae subsp. avenae ATCC 19860	1	22	3	4737
Acidovorax citrulli AAC00-1	Bacteria; Proteobacteria; Betaproteobacteria; Burkholderiales; Comamonadaceae; Acidovorax; Acidovorax citrulli; Acidovorax citrulli AAC00-1	0	20	2	4709
Acidovorax ebreus TPSY	Bacteria; Proteobacteria; Betaproteobacteria; Burkholderiales; Comamonadaceae; Acidovorax; Acidovorax ebreus; Acidovorax ebreus TPSY	0	11	3	3479
Acidovorax sp. JS42	Bacteria; Proteobacteria; Betaproteobacteria; Burkholderiales; Comamonadaceae; Acidovorax; Acidovorax sp. JS42	0	16	3	4155
Acinetobacter baumannii 1656-2	Bacteria; Proteobacteria; Gammaproteobacteria; Pseudomonadales; Moraxellaceae; Acinetobacter; Acinetobacter calcoaceticus/baumannii complex; Acinetobacter baumannii; Acinetobacter baumannii 1656-2	1	11	4	3824
Acinetobacter baumannii AB0057	Bacteria; Proteobacteria; Gammaproteobacteria; Pseudomonadales; Moraxellaceae; Acinetobacter; Acinetobacter calcoaceticus/baumannii complex; Acinetobacter baumannii; Acinetobacter baumannii AB0057	1	13	3	3801
Acinetobacter baumannii AB307-0294	Bacteria; Proteobacteria; Gammaproteobacteria; Pseudomonadales; Moraxellaceae; Acinetobacter; Acinetobacter calcoaceticus/baumannii complex; Acinetobacter baumannii; Acinetobacter baumannii AB307-0294	1	12	4	3451
Acinetobacter baumannii ACICU	Bacteria; Proteobacteria; Gammaproteobacteria; Pseudomonadales; Moraxellaceae; Acinetobacter; Acinetobacter calcoaceticus/baumannii complex; Acinetobacter baumannii; Acinetobacter baumannii ACICU	1	12	4	3759
Acinetobacter baumannii ATCC 17978	Bacteria; Proteobacteria; Gammaproteobacteria; Pseudomonadales; Moraxellaceae; Acinetobacter; Acinetobacter calcoaceticus/baumannii complex; Acinetobacter baumannii; Acinetobacter baumannii ATCC 17978	1	13	4	3367
Acinetobacter baumannii ATCC 19606	Bacteria; Proteobacteria; Gammaproteobacteria; Pseudomonadales; Moraxellaceae; Acinetobacter; Acinetobacter calcoaceticus/baumannii complex; Acinetobacter baumannii; Acinetobacter baumannii ATCC 19606 = CIP 70.34	1	11	4	3766
Acinetobacter baumannii AYE	Bacteria; Proteobacteria; Gammaproteobacteria; Pseudomonadales; Moraxellaceae; Acinetobacter; Acinetobacter calcoaceticus/baumannii complex; Acinetobacter baumannii; Acinetobacter baumannii AYE	1	12	3	3712
Acinetobacter baumannii MDR-TJ	Bacteria; Proteobacteria; Gammaproteobacteria; Pseudomonadales; Moraxellaceae; Acinetobacter; Acinetobacter calcoaceticus/baumannii complex; Acinetobacter baumannii; Acinetobacter baumannii MDR-TJ	2	12	3	3936
Acinetobacter baumannii MDR-ZJ06	Bacteria; Proteobacteria; Gammaproteobacteria; Pseudomonadales; Moraxellaceae; Acinetobacter; Acinetobacter calcoaceticus/baumannii complex; Acinetobacter baumannii; Acinetobacter baumannii MDR-ZJ06	2	13	3	3888
Acinetobacter baumannii SDF	Bacteria; Proteobacteria; Gammaproteobacteria; Pseudomonadales; Moraxellaceae; Acinetobacter; Acinetobacter calcoaceticus/baumannii complex; Acinetobacter baumannii; Acinetobacter baumannii SDF	0	11	4	2975
Acinetobacter baumannii TCDC-AB0715	Bacteria; Proteobacteria; Gammaproteobacteria; Pseudomonadales; Moraxellaceae; Acinetobacter; Acinetobacter calcoaceticus/baumannii complex; Acinetobacter baumannii; Acinetobacter baumannii TCDC-AB0715	1	13	3	3956
Acinetobacter calcoaceticus PHEA-2	Bacteria; Proteobacteria; Gammaproteobacteria; Pseudomonadales; Moraxellaceae; Acinetobacter; Acinetobacter calcoaceticus/baumannii complex; Acinetobacter calcoaceticus; Acinetobacter calcoaceticus PHEA-2	1	14	4	3599
Acinetobacter calcoaceticus ruh2202	Bacteria; Proteobacteria; Gammaproteobacteria; Pseudomonadales; Moraxellaceae; Acinetobacter; Acinetobacter calcoaceticus/baumannii complex; Acinetobacter calcoaceticus; Acinetobacter calcoaceticus RUH2202	0	12	2	3566
Acinetobacter genomosp. 13TU RUH2624	Bacteria; Proteobacteria; Gammaproteobacteria; Pseudomonadales; Moraxellaceae; Acinetobacter; Acinetobacter calcoaceticus/baumannii complex; Acinetobacter nosocomialis; Acinetobacter sp. RUH2624	1	12	2	3631
Acinetobacter johnsonii SH046	Bacteria; Proteobacteria; Gammaproteobacteria; Pseudomonadales; Moraxellaceae; Acinetobacter; Acinetobacter johnsonii; Acinetobacter johnsonii SH046	0	9	2	3363
Acinetobacter junii SH205	Bacteria; Proteobacteria; Gammaproteobacteria; Pseudomonadales; Moraxellaceae; Acinetobacter; Acinetobacter junii; Acinetobacter junii SH205	1	11	2	3186
Acinetobacter lwoffii SH145	Bacteria; Proteobacteria; Gammaproteobacteria; Pseudomonadales; Moraxellaceae; Acinetobacter; Acinetobacter lwoffii; Acinetobacter lwoffii SH145	0	10	3	3134
Acinetobacter oleivorans DR1	Bacteria; Proteobacteria; Gammaproteobacteria; Pseudomonadales; Moraxellaceae; Acinetobacter; Acinetobacter oleivorans; Acinetobacter oleivorans DR1	1	14	3	3874
Acinetobacter radioresistens SH164	Bacteria; Proteobacteria; Gammaproteobacteria; Pseudomonadales; Moraxellaceae; Acinetobacter; Acinetobacter radioresistens; Acinetobacter radioresistens SH164	0	9	3	2874
Acinetobacter sp. ADP1	Bacteria; Proteobacteria; Gammaproteobacteria; Pseudomonadales; Moraxellaceae; Acinetobacter; Acinetobacter sp. ADP1	0	11	2	3307
Acinetobacter sp. SH024	Bacteria; Proteobacteria; Gammaproteobacteria; Pseudomonadales; Moraxellaceae; Acinetobacter; Acinetobacter calcoaceticus/baumannii complex; Acinetobacter pittii; Acinetobacter sp. SH024	0	14	3	3631
Actinobacillus pleuropneumoniae serovar 3 str. JL03	Bacteria; Proteobacteria; Gammaproteobacteria; Pasteurellales; Pasteurellaceae; Actinobacillus; Actinobacillus pleuropneumoniae; Actinobacillus pleuropneumoniae serovar 3; Actinobacillus pleuropneumoniae serovar 3 str. JL03	0	18	0	2036
Actinobacillus pleuropneumoniae serovar 5b str. L20	Bacteria; Proteobacteria; Gammaproteobacteria; Pasteurellales; Pasteurellaceae; Actinobacillus; Actinobacillus pleuropneumoniae; Actinobacillus pleuropneumoniae serovar 5; Actinobacillus pleuropneumoniae serovar 5b str. L20	0	16	0	2013
Actinobacillus pleuropneumoniae serovar 7 str. AP76	Bacteria; Proteobacteria; Gammaproteobacteria; Pasteurellales; Pasteurellaceae; Actinobacillus; Actinobacillus pleuropneumoniae; Actinobacillus pleuropneumoniae serovar 7; Actinobacillus pleuropneumoniae serovar 7 str. AP76	0	19	0	2142
Actinobacillus succinogenes 130Z	Bacteria; Proteobacteria; Gammaproteobacteria; Pasteurellales; Pasteurellaceae; Actinobacillus; Actinobacillus succinogenes; Actinobacillus succinogenes 130Z	0	14	0	2079
Actinomyces graevenitzii C83	Bacteria; Actinobacteria; Actinobacteria; Actinobacteridae; Actinomycetales; Actinomycineae; Actinomycetaceae; Actinomyces; Actinomyces graevenitzii; Actinomyces graevenitzii C83	2	7	4	1853
Actinomyces odontolyticus ATCC 17982	Bacteria; Actinobacteria; Actinobacteria; Actinobacteridae; Actinomycetales; Actinomycineae; Actinomycetaceae; Actinomyces; Actinomyces odontolyticus; Actinomyces odontolyticus ATCC 17982	0	4	0	2159
Actinomyces sp. F0330	Bacteria; Actinobacteria; Actinobacteria; Actinobacteridae; Actinomycetales; Actinomycineae; Actinomycetaceae; Actinomyces; Actinomyces sp.	4	19	0	3019
Actinomyces viscosus C505	Bacteria; Actinobacteria; Actinobacteria; Actinobacteridae; Actinomycetales; Actinomycineae; Actinomycetaceae; Actinomyces; Actinomyces viscosus; Actinomyces viscosus C505	2	15	0	2602
Actinoplanes missouriensis 431	Bacteria; Actinobacteria; Actinobacteria; Actinobacteridae; Actinomycetales; Micromonosporineae; Micromonosporaceae; Actinoplanes; Actinoplanes missouriensis; Actinoplanes missouriensis 431	11	69	1	8124
Actinoplanes sp. SE50/110	Bacteria; Actinobacteria; Actinobacteria; Actinobacteridae; Actinomycetales; Micromonosporineae; Micromonosporaceae; Actinoplanes; Actinoplanes sp. SE50/110	13	82	3	8247
Actinosynnema mirum DSM 43827	Bacteria; Actinobacteria; Actinobacteria; Actinobacteridae; Actinomycetales; Pseudonocardineae; Pseudonocardiaceae; Actinosynnema; Actinosynnema mirum; Actinosynnema mirum DSM 43827	7	57	1	6916
Advenella kashmirensis WT001	Bacteria; Proteobacteria; Betaproteobacteria; Burkholderiales; Alcaligenaceae; Advenella; Advenella kashmirensis; Advenella kashmirensis WT001	0	7	2	3933
Aequorivita sublithincola DSM 14238	Bacteria; Bacteroidetes/Chlorobi group; Bacteroidetes; Flavobacteriia; Flavobacteriales; Flavobacteriaceae; Aequorivita; Aequorivita sublithincola; Aequorivita sublithincola DSM 14238	1	56	1	3140
Aerococcus urinae ACS-120-V-Col10a	Bacteria; Firmicutes; Bacilli; Lactobacillales; Aerococcaceae; Aerococcus; Aerococcus urinae; Aerococcus urinae ACS-120-V-Col10a	0	3	0	1726
Aeromonas hydrophila subsp. hydrophila ATCC 7966	Bacteria; Proteobacteria; Gammaproteobacteria; Aeromonadales; Aeromonadaceae; Aeromonas; Aeromonas hydrophila; Aeromonas hydrophila subsp. hydrophila; Aeromonas hydrophila subsp. hydrophila ATCC 7966	0	29	0	4121
Aeromonas salmonicida subsp. salmonicida A449	Bacteria; Proteobacteria; Gammaproteobacteria; Aeromonadales; Aeromonadaceae; Aeromonas; Aeromonas salmonicida; Aeromonas salmonicida subsp. salmonicida; Aeromonas salmonicida subsp. salmonicida A449	0	27	0	4436
Aeromonas veronii B565	Bacteria; Proteobacteria; Gammaproteobacteria; Aeromonadales; Aeromonadaceae; Aeromonas; Aeromonas veronii; Aeromonas veronii B565	1	33	0	4028
Aggregatibacter actinomycetemcomitans ANH9381	Bacteria; Proteobacteria; Gammaproteobacteria; Pasteurellales; Pasteurellaceae; Aggregatibacter; Aggregatibacter actinomycetemcomitans; Aggregatibacter actinomycetemcomitans ANH9381	1	12	0	2058
Aggregatibacter actinomycetemcomitans D7S-1	Bacteria; Proteobacteria; Gammaproteobacteria; Pasteurellales; Pasteurellaceae; Aggregatibacter; Aggregatibacter actinomycetemcomitans; Aggregatibacter actinomycetemcomitans D7S-1	1	14	0	2255
Aggregatibacter aphrophilus NJ8700	Bacteria; Proteobacteria; Gammaproteobacteria; Pasteurellales; Pasteurellaceae; Aggregatibacter; Aggregatibacter aphrophilus; Aggregatibacter aphrophilus NJ8700	1	13	0	2219
Agrobacterium radiobacter K84	Bacteria; Proteobacteria; Alphaproteobacteria; Rhizobiales; Rhizobiaceae; Rhizobium/Agrobacterium group; Agrobacterium; Agrobacterium tumefaciens complex; Agrobacterium tumefaciens; Agrobacterium radiobacter K84	2	27	4	6684
Agrobacterium sp. H13-3	Bacteria; Proteobacteria; Alphaproteobacteria; Rhizobiales; Rhizobiaceae; Rhizobium/Agrobacterium group; Agrobacterium; Agrobacterium sp. H13-3	2	18	1	5345
Agrobacterium tumefaciens str. C58	Bacteria; Proteobacteria; Alphaproteobacteria; Rhizobiales; Rhizobiaceae; Rhizobium/Agrobacterium group; Agrobacterium; Agrobacterium tumefaciens complex; Agrobacterium fabrum; Agrobacterium tumefaciens str. C58	2	19	1	5355
Agrobacterium vitis S4	Bacteria; Proteobacteria; Alphaproteobacteria; Rhizobiales; Rhizobiaceae; Rhizobium/Agrobacterium group; Agrobacterium; Agrobacterium vitis; Agrobacterium vitis S4	1	28	2	5389
Akkermansia muciniphila ATCC BAA-835	Bacteria; Chlamydiae/Verrucomicrobia group; Verrucomicrobia; Verrucomicrobiae; Verrucomicrobiales; Verrucomicrobiaceae; Akkermansia; Akkermansia muciniphila; Akkermansia muciniphila ATCC BAA-835	2	20	3	2138
Alcanivorax borkumensis SK2	Bacteria; Proteobacteria; Gammaproteobacteria; Oceanospirillales; Alcanivoracaceae; Alcanivorax; Alcanivorax borkumensis; Alcanivorax borkumensis SK2	0	16	1	2755
Alicycliphilus denitrificans BC	Bacteria; Proteobacteria; Betaproteobacteria; Burkholderiales; Comamonadaceae; Alicycliphilus; Alicycliphilus denitrificans; Alicycliphilus denitrificans BC	0	12	1	4542
Alicycliphilus denitrificans K601	Bacteria; Proteobacteria; Betaproteobacteria; Burkholderiales; Comamonadaceae; Alicycliphilus; Alicycliphilus denitrificans; Alicycliphilus denitrificans K601	0	13	1	4696
Alicyclobacillus acidocaldarius subsp. acidocaldarius DSM 446	Bacteria; Firmicutes; Bacilli; Bacillales; Alicyclobacillaceae; Alicyclobacillus; Alicyclobacillus acidocaldarius; Alicyclobacillus acidocaldarius subsp. acidocaldarius; Alicyclobacillus acidocaldarius subsp. acidocaldarius DSM 446	1	8	1	3084
Alicyclobacillus acidocaldarius subsp. acidocaldarius Tc-4-1	Bacteria; Firmicutes; Bacilli; Bacillales; Alicyclobacillaceae; Alicyclobacillus; Alicyclobacillus acidocaldarius; Alicyclobacillus acidocaldarius subsp. acidocaldarius; Alicyclobacillus acidocaldarius subsp. acidocaldarius Tc-4-1	1	7	0	3208
Aliivibrio salmonicida LFI1238	Bacteria; Proteobacteria; Gammaproteobacteria; Vibrionales; Vibrionaceae; Aliivibrio; Aliivibrio salmonicida; Aliivibrio salmonicida LFI1238	0	23	0	3911
Alistipes finegoldii DSM 17242	Bacteria; Bacteroidetes/Chlorobi group; Bacteroidetes; Bacteroidia; Bacteroidales; Rikenellaceae; Alistipes; Alistipes finegoldii; Alistipes finegoldii DSM 17242	3	64	0	3110
Alkalilimnicola ehrlichii MLHE-1	Bacteria; Proteobacteria; Gammaproteobacteria; Chromatiales; Ectothiorhodospiraceae; Alkalilimnicola; Alkalilimnicola ehrlichii; Alkalilimnicola ehrlichii MLHE-1	0	23	1	2865
Alkaliphilus metalliredigens QYMF	Bacteria; Firmicutes; Clostridia; Clostridiales; Clostridiaceae; Alkaliphilus; Alkaliphilus metalliredigens; Alkaliphilus metalliredigens QYMF	7	19	0	4625
Alkaliphilus oremlandii OhILAs	Bacteria; Firmicutes; Clostridia; Clostridiales; Clostridiaceae; Alkaliphilus; Alkaliphilus oremlandii; Alkaliphilus oremlandii OhILAs	5	5	0	2836
Allochromatium vinosum DSM 180	Bacteria; Proteobacteria; Gammaproteobacteria; Chromatiales; Chromatiaceae; Allochromatium; Allochromatium vinosum; Allochromatium vinosum DSM 180	2	21	3	3220
Alteromonas macleodii str. 'Deep ecotype'	Bacteria; Proteobacteria; Gammaproteobacteria; Alteromonadales; Alteromonadaceae; Alteromonas; Alteromonas macleodii; Alteromonas macleodii str. 'Deep ecotype'	2	32	0	4084
Alteromonas sp. SN2	Bacteria; Proteobacteria; Gammaproteobacteria; Alteromonadales; Alteromonadaceae; Alteromonas; Alteromonas sp. SN2	2	50	1	4371
Aminobacterium colombiense DSM 12261	Bacteria; Synergistetes; Synergistia; Synergistales; Synergistaceae; Aminobacterium; Aminobacterium colombiense; Aminobacterium colombiense DSM 12261	0	2	0	1876
Ammonifex degensii KC4	Bacteria; Firmicutes; Clostridia; Thermoanaerobacterales; Thermoanaerobacteraceae; Moorella group; Ammonifex; Ammonifex degensii; Ammonifex degensii KC4	3	9	0	2080
Amycolatopsis mediterranei S699	Bacteria; Actinobacteria; Actinobacteria; Actinobacteridae; Actinomycetales; Pseudonocardineae; Pseudonocardiaceae; Amycolatopsis; Amycolatopsis mediterranei; Amycolatopsis mediterranei S699	5	88	1	9575
Amycolatopsis mediterranei S699	Bacteria; Actinobacteria; Actinobacteria; Actinobacteridae; Actinomycetales; Pseudonocardineae; Pseudonocardiaceae; Amycolatopsis; Amycolatopsis mediterranei; Amycolatopsis mediterranei S699	6	87	1	9222
Amycolatopsis mediterranei U32	Bacteria; Actinobacteria; Actinobacteria; Actinobacteridae; Actinomycetales; Pseudonocardineae; Pseudonocardiaceae; Amycolatopsis; Amycolatopsis mediterranei; Amycolatopsis mediterranei U32	6	89	1	9228
Amycolicicoccus subflavus DQS3-9A1	Bacteria; Actinobacteria; Actinobacteria; Actinobacteridae; Actinomycetales; Corynebacterineae; Mycobacteriaceae; Amycolicicoccus; Amycolicicoccus subflavus; Amycolicicoccus subflavus DQS3-9A1	7	8	1	4705
Anabaena variabilis ATCC 29413	Bacteria; Cyanobacteria; Nostocales; Nostocaceae; Anabaena; Anabaena variabilis; Anabaena variabilis ATCC 29413	19	81	4	5710
Anaerobaculum mobile DSM 13181	Bacteria; Synergistetes; Synergistia; Synergistales; Synergistaceae; Anaerobaculum; Anaerobaculum mobile; Anaerobaculum mobile DSM 13181	1	6	0	2017
Anaerococcus prevotii DSM 20548	Bacteria; Firmicutes; Clostridia; Clostridiales; Clostridiales incertae sedis; Clostridiales Family XI. Incertae Sedis; Anaerococcus; Anaerococcus prevotii; Anaerococcus prevotii DSM 20548	0	3	0	1806
Anaerolinea thermophila UNI-1	Bacteria; Chloroflexi; Anaerolineae; Anaerolineales; Anaerolineaceae; Anaerolinea; Anaerolinea thermophila; Anaerolinea thermophila UNI-1	8	30	0	3166
Anaeromyxobacter dehalogenans 2CP-1	Bacteria; Proteobacteria; delta/epsilon subdivisions; Deltaproteobacteria; Myxococcales; Cystobacterineae; Myxococcaceae; Anaeromyxobacter; Anaeromyxobacter dehalogenans; Anaeromyxobacter dehalogenans 2CP-1	12	83	0	4473
Anaeromyxobacter dehalogenans 2CP-C	Bacteria; Proteobacteria; delta/epsilon subdivisions; Deltaproteobacteria; Myxococcales; Cystobacterineae; Myxococcaceae; Anaeromyxobacter; Anaeromyxobacter dehalogenans; Anaeromyxobacter dehalogenans 2CP-C	10	87	0	4346
Anaeromyxobacter sp. Fw109-5	Bacteria; Proteobacteria; delta/epsilon subdivisions; Deltaproteobacteria; Myxococcales; Cystobacterineae; Myxococcaceae; Anaeromyxobacter; Anaeromyxobacter sp. Fw109-5	11	89	0	4466
Anaeromyxobacter sp. K	Bacteria; Proteobacteria; delta/epsilon subdivisions; Deltaproteobacteria; Myxococcales; Cystobacterineae; Myxococcaceae; Anaeromyxobacter; Anaeromyxobacter sp. K	12	85	0	4457
Anaplasma centrale str. Israel	Bacteria; Proteobacteria; Alphaproteobacteria; Rickettsiales; Anaplasmataceae; Anaplasma; Anaplasma centrale; Anaplasma centrale str. Israel	0	4	3	923
Anaplasma marginale str. Florida	Bacteria; Proteobacteria; Alphaproteobacteria; Rickettsiales; Anaplasmataceae; Anaplasma; Anaplasma marginale; Anaplasma marginale str. Florida	0	4	3	940
Anaplasma marginale str. St. Maries	Bacteria; Proteobacteria; Alphaproteobacteria; Rickettsiales; Anaplasmataceae; Anaplasma; Anaplasma marginale; Anaplasma marginale str. St. Maries	0	4	3	948
Anaplasma phagocytophilum HZ	Bacteria; Proteobacteria; Alphaproteobacteria; Rickettsiales; Anaplasmataceae; Anaplasma; phagocytophilum group; Anaplasma phagocytophilum; Anaplasma phagocytophilum HZ	0	4	4	1264
Anoxybacillus flavithermus WK1	Bacteria; Firmicutes; Bacilli; Bacillales; Bacillaceae; Anoxybacillus; Anoxybacillus flavithermus; Anoxybacillus flavithermus WK1	4	8	1	2831
Aquifex aeolicus VF5	Bacteria; Aquificae; Aquificae; Aquificales; Aquificaceae; Aquifex; Aquifex aeolicus; Aquifex aeolicus VF5	0	17	0	1560
Arcanobacterium haemolyticum DSM 20595	Bacteria; Actinobacteria; Actinobacteria; Actinobacteridae; Actinomycetales; Actinomycineae; Actinomycetaceae; Arcanobacterium; Arcanobacterium haemolyticum; Arcanobacterium haemolyticum DSM 20595	0	2	0	1731
Arcobacter butzleri ED-1	Bacteria; Proteobacteria; delta/epsilon subdivisions; Epsilonproteobacteria; Campylobacterales; Campylobacteraceae; Arcobacter; Arcobacter butzleri; Arcobacter butzleri ED-1	1	10	4	2158
Arcobacter butzleri RM4018	Bacteria; Proteobacteria; delta/epsilon subdivisions; Epsilonproteobacteria; Campylobacterales; Campylobacteraceae; Arcobacter; Arcobacter butzleri; Arcobacter butzleri RM4018	1	10	4	2259
Arcobacter nitrofigilis DSM 7299	Bacteria; Proteobacteria; delta/epsilon subdivisions; Epsilonproteobacteria; Campylobacterales; Campylobacteraceae; Arcobacter; Arcobacter nitrofigilis; Arcobacter nitrofigilis DSM 7299	1	12	3	3126
Arcobacter sp. L	Bacteria; Proteobacteria; delta/epsilon subdivisions; Epsilonproteobacteria; Campylobacterales; Campylobacteraceae; Arcobacter; Arcobacter sp. L	1	11	5	2848
Aromatoleum aromaticum EbN1	Bacteria; Proteobacteria; Betaproteobacteria; Rhodocyclales; Rhodocyclaceae; Aromatoleum; Aromatoleum aromaticum; Aromatoleum aromaticum EbN1	0	19	2	4579
Arthrobacter arilaitensis Re117	Bacteria; Actinobacteria; Actinobacteria; Actinobacteridae; Actinomycetales; Micrococcineae; Micrococcaceae; Arthrobacter; Arthrobacter arilaitensis; Arthrobacter arilaitensis Re117	1	7	1	3436
Arthrobacter aurescens TC1	Bacteria; Actinobacteria; Actinobacteria; Actinobacteridae; Actinomycetales; Micrococcineae; Micrococcaceae; Arthrobacter; Arthrobacter aurescens; Arthrobacter aurescens TC1	4	13	2	4588
Arthrobacter chlorophenolicus A6	Bacteria; Actinobacteria; Actinobacteria; Actinobacteridae; Actinomycetales; Micrococcineae; Micrococcaceae; Arthrobacter; Arthrobacter chlorophenolicus; Arthrobacter chlorophenolicus A6	5	16	2	4590
Arthrobacter phenanthrenivorans Sphe3	Bacteria; Actinobacteria; Actinobacteria; Actinobacteridae; Actinomycetales; Micrococcineae; Micrococcaceae; Arthrobacter; Arthrobacter phenanthrenivorans; Arthrobacter phenanthrenivorans Sphe3	3	10	2	4131
Arthrobacter sp. FB24	Bacteria; Actinobacteria; Actinobacteria; Actinobacteridae; Actinomycetales; Micrococcineae; Micrococcaceae; Arthrobacter; Arthrobacter sp. FB24	5	16	2	4523
Aster yellows witches'-broom phytoplasma AYWB	Bacteria; Tenericutes; Mollicutes; Acholeplasmatales; Acholeplasmataceae; Candidatus Phytoplasma; Candidatus Phytoplasma asteris; Aster yellows witches'-broom phytoplasma; Aster yellows witches'-broom phytoplasma AYWB	0	0	0	693
Asticcacaulis excentricus CB 48	Bacteria; Proteobacteria; Alphaproteobacteria; Caulobacterales; Caulobacteraceae; Asticcacaulis; Asticcacaulis excentricus; Asticcacaulis excentricus CB 48	3	24	0	3763
Atopobium parvulum DSM 20469	Bacteria; Actinobacteria; Actinobacteria; Coriobacteridae; Coriobacteriales; Coriobacterineae; Coriobacteriaceae; Atopobium; Atopobium parvulum; Atopobium parvulum DSM 20469	3	6	0	1353
Azoarcus sp. BH72	Bacteria; Proteobacteria; Betaproteobacteria; Rhodocyclales; Rhodocyclaceae; Azoarcus; Azoarcus sp. BH72	2	20	3	3989
Azorhizobium caulinodans ORS 571	Bacteria; Proteobacteria; Alphaproteobacteria; Rhizobiales; Xanthobacteraceae; Azorhizobium; Azorhizobium caulinodans; Azorhizobium caulinodans ORS 571	5	23	2	4717
Azospirillum brasilense Sp245	Bacteria; Proteobacteria; Alphaproteobacteria; Rhodospirillales; Rhodospirillaceae; Azospirillum; Azospirillum brasilense; Azospirillum brasilense Sp245	6	75	3	7557
Azospirillum lipoferum 4B	Bacteria; Proteobacteria; Alphaproteobacteria; Rhodospirillales; Rhodospirillaceae; Azospirillum; Azospirillum lipoferum; Azospirillum lipoferum 4B	5	67	3	6094
Azospirillum sp. B510	Bacteria; Proteobacteria; Alphaproteobacteria; Rhodospirillales; Rhodospirillaceae; Azospirillum; Azospirillum sp. B510	4	62	2	6309
Azotobacter vinelandii DJ	Bacteria; Proteobacteria; Gammaproteobacteria; Pseudomonadales; Pseudomonadaceae; Azotobacter group; Azotobacter; Azotobacter vinelandii; Azotobacter vinelandii DJ	1	21	2	5050
Bacillus amyloliquefaciens DSM 7	Bacteria; Firmicutes; Bacilli; Bacillales; Bacillaceae; Bacillus; Bacillus subtilis group; Bacillus amyloliquefaciens; Bacillus amyloliquefaciens subsp. amyloliquefaciens; Bacillus amyloliquefaciens DSM 7	2	17	0	3893
Bacillus amyloliquefaciens FZB42	Bacteria; Firmicutes; Bacilli; Bacillales; Bacillaceae; Bacillus; Bacillus subtilis group; Bacillus amyloliquefaciens; Bacillus amyloliquefaciens subsp. plantarum; Bacillus amyloliquefaciens FZB42	3	15	0	3693
Bacillus amyloliquefaciens LL3	Bacteria; Firmicutes; Bacilli; Bacillales; Bacillaceae; Bacillus; Bacillus subtilis group; Bacillus amyloliquefaciens; Bacillus amyloliquefaciens LL3	2	19	0	4228
Bacillus amyloliquefaciens subsp. plantarum CAU B946	Bacteria; Firmicutes; Bacilli; Bacillales; Bacillaceae; Bacillus; Bacillus subtilis group; Bacillus amyloliquefaciens; Bacillus amyloliquefaciens subsp. plantarum; Bacillus amyloliquefaciens subsp. plantarum CAU B946	3	17	0
Bacillus amyloliquefaciens subsp. plantarum YAU B9601-Y2	Bacteria; Firmicutes; Bacilli; Bacillales; Bacillaceae; Bacillus; Bacillus subtilis group; Bacillus amyloliquefaciens; Bacillus amyloliquefaciens subsp. plantarum; Bacillus amyloliquefaciens subsp. plantarum YAU B9601-Y2	3	19	0	3981
Bacillus amyloliquefaciens TA208	Bacteria; Firmicutes; Bacilli; Bacillales; Bacillaceae; Bacillus; Bacillus subtilis group; Bacillus amyloliquefaciens; Bacillus amyloliquefaciens TA208	3	17	0	4089
Bacillus amyloliquefaciens XH7	Bacteria; Firmicutes; Bacilli; Bacillales; Bacillaceae; Bacillus; Bacillus subtilis group; Bacillus amyloliquefaciens; Bacillus amyloliquefaciens XH7	3	18	0	4190
Bacillus amyloliquefaciens Y2	Bacteria; Firmicutes; Bacilli; Bacillales; Bacillaceae; Bacillus; Bacillus subtilis group; Bacillus amyloliquefaciens; Bacillus amyloliquefaciens Y2	3	19	0	4238
Bacillus anthracis str. 'Ames Ancestor'	Bacteria; Firmicutes; Bacilli; Bacillales; Bacillaceae; Bacillus; Bacillus cereus group; Bacillus anthracis; Bacillus anthracis str. 'Ames Ancestor'	8	23	4	5305
Bacillus anthracis str. A0248	Bacteria; Firmicutes; Bacilli; Bacillales; Bacillaceae; Bacillus; Bacillus cereus group; Bacillus anthracis; Bacillus anthracis str. A0248	8	22	4	5292
Bacillus anthracis str. Ames	Bacteria; Firmicutes; Bacilli; Bacillales; Bacillaceae; Bacillus; Bacillus cereus group; Bacillus anthracis; Bacillus anthracis str. Ames	8	24	4	5123
Bacillus anthracis str. CDC 684	Bacteria; Firmicutes; Bacilli; Bacillales; Bacillaceae; Bacillus; Bacillus cereus group; Bacillus anthracis; Bacillus anthracis str. CDC 684	8	27	4	5902
Bacillus anthracis str. H9401	Bacteria; Firmicutes; Bacilli; Bacillales; Bacillaceae; Bacillus; Bacillus cereus group; Bacillus anthracis; Bacillus anthracis str. H9401	8	27	4	5791
Bacillus anthracis str. Sterne	Bacteria; Firmicutes; Bacilli; Bacillales; Bacillaceae; Bacillus; Bacillus cereus group; Bacillus anthracis; Bacillus anthracis str. Sterne	8	26	4	5091
Bacillus atrophaeus 1942	Bacteria; Firmicutes; Bacilli; Bacillales; Bacillaceae; Bacillus; Bacillus subtilis group; Bacillus atrophaeus; Bacillus atrophaeus 1942	5	22	0	4186
Bacillus cellulosilyticus DSM 2522	Bacteria; Firmicutes; Bacilli; Bacillales; Bacillaceae; Bacillus; Bacillus cellulosilyticus; Bacillus cellulosilyticus DSM 2522	5	22	1	4266
Bacillus cereus 03BB102	Bacteria; Firmicutes; Bacilli; Bacillales; Bacillaceae; Bacillus; Bacillus cereus group; Bacillus cereus; Bacillus cereus 03BB102	8	23	4	5606
Bacillus cereus AH187	Bacteria; Firmicutes; Bacilli; Bacillales; Bacillaceae; Bacillus; Bacillus cereus group; Bacillus cereus; Bacillus cereus AH187	9	23	2	5783
Bacillus cereus AH820	Bacteria; Firmicutes; Bacilli; Bacillales; Bacillaceae; Bacillus; Bacillus cereus group; Bacillus cereus; Bacillus cereus AH820	12	25	3	5810
Bacillus cereus ATCC 10987	Bacteria; Firmicutes; Bacilli; Bacillales; Bacillaceae; Bacillus; Bacillus cereus group; Bacillus cereus; Bacillus cereus ATCC 10987	9	24	3	5861
Bacillus cereus ATCC 14579	Bacteria; Firmicutes; Bacilli; Bacillales; Bacillaceae; Bacillus; Bacillus cereus group; Bacillus cereus; Bacillus cereus ATCC 14579	11	23	4	5255
Bacillus cereus B4264	Bacteria; Firmicutes; Bacilli; Bacillales; Bacillaceae; Bacillus; Bacillus cereus group; Bacillus cereus; Bacillus cereus B4264	7	23	4	5398
Bacillus cereus biovar anthracis str. CI	Bacteria; Firmicutes; Bacilli; Bacillales; Bacillaceae; Bacillus; Bacillus cereus group; Bacillus cereus; Bacillus cereus biovar anthracis str. CI	7	25	3	5558
Bacillus cereus E33L	Bacteria; Firmicutes; Bacilli; Bacillales; Bacillaceae; Bacillus; Bacillus cereus group; Bacillus cereus; Bacillus cereus E33L	9	29	5	5641
Bacillus cereus F837/76	Bacteria; Firmicutes; Bacilli; Bacillales; Bacillaceae; Bacillus; Bacillus cereus group; Bacillus cereus; Bacillus cereus F837/76	7	27	3	5468
Bacillus cereus G9842	Bacteria; Firmicutes; Bacilli; Bacillales; Bacillaceae; Bacillus; Bacillus cereus group; Bacillus cereus; Bacillus cereus G9842	10	25	4	5857
Bacillus cereus NC7401	Bacteria; Firmicutes; Bacilli; Bacillales; Bacillaceae; Bacillus; Bacillus cereus group; Bacillus cereus; Bacillus cereus NC7401	9	23	2	5754
Bacillus cereus Q1	Bacteria; Firmicutes; Bacilli; Bacillales; Bacillaceae; Bacillus; Bacillus cereus group; Bacillus cereus; Bacillus cereus Q1	9	24	3	5489
Bacillus cereus subsp. cytotoxis NVH 391-98	Bacteria; Firmicutes; Bacilli; Bacillales; Bacillaceae; Bacillus; Bacillus cereus group; Bacillus cytotoxicus; Bacillus cytotoxicus NVH 391-98	4	20	1	3844
Bacillus clausii KSM-K16	Bacteria; Firmicutes; Bacilli; Bacillales; Bacillaceae; Bacillus; Bacillus clausii; Bacillus clausii KSM-K16	7	21	1	4096
Bacillus coagulans 2-6	Bacteria; Firmicutes; Bacilli; Bacillales; Bacillaceae; Bacillus; Bacillus coagulans; Bacillus coagulans 2-6	2	6	0	2971
Bacillus coagulans 36D1	Bacteria; Firmicutes; Bacilli; Bacillales; Bacillaceae; Bacillus; Bacillus coagulans; Bacillus coagulans 36D1	2	6	0	3290
Bacillus halodurans C-125	Bacteria; Firmicutes; Bacilli; Bacillales; Bacillaceae; Bacillus; Bacillus halodurans; Bacillus halodurans C-125	6	20	0	4065
Bacillus licheniformis DSM 13 = ATCC 14580	Bacteria; Firmicutes; Bacilli; Bacillales; Bacillaceae; Bacillus; Bacillus subtilis group; Bacillus licheniformis; Bacillus licheniformis DSM 13 = ATCC 14580	5	18	0	4173
Bacillus licheniformis DSM 13 = ATCC 14580	Bacteria; Firmicutes; Bacilli; Bacillales; Bacillaceae; Bacillus; Bacillus subtilis group; Bacillus licheniformis; Bacillus licheniformis DSM 13 = ATCC 14580	4	17	0	4171
Bacillus megaterium DSM 319	Bacteria; Firmicutes; Bacilli; Bacillales; Bacillaceae; Bacillus; Bacillus megaterium; Bacillus megaterium DSM 319	6	12	2	5100
Bacillus megaterium QM B1551	Bacteria; Firmicutes; Bacilli; Bacillales; Bacillaceae; Bacillus; Bacillus megaterium; Bacillus megaterium QM B1551	6	12	3	5612
Bacillus megaterium WSH-002	Bacteria; Firmicutes; Bacilli; Bacillales; Bacillaceae; Bacillus; Bacillus megaterium; Bacillus megaterium WSH-002	6	12	4	5274
Bacillus pseudofirmus OF4	Bacteria; Firmicutes; Bacilli; Bacillales; Bacillaceae; Bacillus; Bacillus pseudofirmus; Bacillus pseudofirmus OF4	3	16	0	4335
Bacillus pumilus SAFR-032	Bacteria; Firmicutes; Bacilli; Bacillales; Bacillaceae; Bacillus; Bacillus pumilus; Bacillus pumilus SAFR-032	3	20	0	3679
Bacillus selenitireducens MLS10	Bacteria; Firmicutes; Bacilli; Bacillales; Bacillaceae; Bacillus; Bacillus selenitireducens; Bacillus selenitireducens MLS10	5	9	0	3255
Bacillus sp. JS	Bacteria; Firmicutes; Bacilli; Bacillales; Bacillaceae; Bacillus; Bacillus sp. JS	3	18	0	4239
Bacillus subtilis BSn5	Bacteria; Firmicutes; Bacilli; Bacillales; Bacillaceae; Bacillus; Bacillus subtilis group; Bacillus subtilis; Bacillus subtilis BSn5	4	17	0	4145
Bacillus subtilis subsp. spizizenii str. W23	Bacteria; Firmicutes; Bacilli; Bacillales; Bacillaceae; Bacillus; Bacillus subtilis group; Bacillus subtilis; Bacillus subtilis subsp. spizizenii; Bacillus subtilis subsp. spizizenii str. W23	3	17	0	4062
Bacillus subtilis subsp. spizizenii TU-B-10	Bacteria; Firmicutes; Bacilli; Bacillales; Bacillaceae; Bacillus; Bacillus subtilis group; Bacillus subtilis; Bacillus subtilis subsp. spizizenii; Bacillus subtilis subsp. spizizenii TU-B-10	4	20	0	4297
Bacillus subtilis subsp. subtilis str. 168	Bacteria; Firmicutes; Bacilli; Bacillales; Bacillaceae; Bacillus; Bacillus subtilis group; Bacillus subtilis; Bacillus subtilis subsp. subtilis; Bacillus subtilis subsp. subtilis str. 168	4	19	0	4279
Bacillus subtilis subsp. subtilis str. RO-NN-1	Bacteria; Firmicutes; Bacilli; Bacillales; Bacillaceae; Bacillus; Bacillus subtilis group; Bacillus subtilis; Bacillus subtilis subsp. subtilis; Bacillus subtilis subsp. subtilis str. RO-NN-1	3	16	0	4101
Bacillus thuringiensis BMB171	Bacteria; Firmicutes; Bacilli; Bacillales; Bacillaceae; Bacillus; Bacillus cereus group; Bacillus thuringiensis; Bacillus thuringiensis serovar kurstaki; Bacillus thuringiensis BMB171	10	29	4	5352
Bacillus thuringiensis serovar chinensis CT-43	Bacteria; Firmicutes; Bacilli; Bacillales; Bacillaceae; Bacillus; Bacillus cereus group; Bacillus thuringiensis; Bacillus thuringiensis serovar chinensis; Bacillus thuringiensis serovar chinensis CT-43	12	29	5	6206
Bacillus thuringiensis serovar finitimus YBT-020	Bacteria; Firmicutes; Bacilli; Bacillales; Bacillaceae; Bacillus; Bacillus cereus group; Bacillus thuringiensis; Bacillus thuringiensis serovar finitimus; Bacillus thuringiensis serovar finitimus YBT-020	11	25	4	5782
Bacillus thuringiensis serovar konkukian str. 97-27	Bacteria; Firmicutes; Bacilli; Bacillales; Bacillaceae; Bacillus; Bacillus cereus group; Bacillus thuringiensis; Bacillus thuringiensis serovar konkukian; Bacillus thuringiensis serovar konkukian str. 97-27	7	23	5	5197
Bacillus thuringiensis str. Al Hakam	Bacteria; Firmicutes; Bacilli; Bacillales; Bacillaceae; Bacillus; Bacillus cereus group; Bacillus thuringiensis; Bacillus thuringiensis str. Al Hakam	8	25	4	4798
Bacillus weihenstephanensis KBAB4	Bacteria; Firmicutes; Bacilli; Bacillales; Bacillaceae; Bacillus; Bacillus cereus group; Bacillus weihenstephanensis; Bacillus weihenstephanensis KBAB4	10	26	5	5653
Bacteriovorax marinus SJ	Bacteria; Proteobacteria; delta/epsilon subdivisions; Deltaproteobacteria; Bdellovibrionales; Bacteriovoracaceae; Bacteriovorax; Bacteriovorax marinus; Bacteriovorax marinus SJ	2	33	4	3231
Bacteroides fragilis 638R	Bacteria; Bacteroidetes/Chlorobi group; Bacteroidetes; Bacteroidia; Bacteroidales; Bacteroidaceae; Bacteroides; Bacteroides fragilis; Bacteroides fragilis 638R	6	116	0	4290
Bacteroides fragilis NCTC 9343	Bacteria; Bacteroidetes/Chlorobi group; Bacteroidetes; Bacteroidia; Bacteroidales; Bacteroidaceae; Bacteroides; Bacteroides fragilis; Bacteroides fragilis NCTC 9343	3	114	0	4231
Bacteroides fragilis YCH46	Bacteria; Bacteroidetes/Chlorobi group; Bacteroidetes; Bacteroidia; Bacteroidales; Bacteroidaceae; Bacteroides; Bacteroides fragilis; Bacteroides fragilis YCH46	3	114	2	4624
Bacteroides helcogenes P 36-108	Bacteria; Bacteroidetes/Chlorobi group; Bacteroidetes; Bacteroidia; Bacteroidales; Bacteroidaceae; Bacteroides; Bacteroides helcogenes; Bacteroides helcogenes P 36-108	2	91	0	3244
Bacteroides salanitronis DSM 18170	Bacteria; Bacteroidetes/Chlorobi group; Bacteroidetes; Bacteroidia; Bacteroidales; Bacteroidaceae; Bacteroides; Bacteroides salanitronis; Bacteroides salanitronis DSM 18170	2	72	2	3641
Bacteroides thetaiotaomicron VPI-5482	Bacteria; Bacteroidetes/Chlorobi group; Bacteroidetes; Bacteroidia; Bacteroidales; Bacteroidaceae; Bacteroides; Bacteroides thetaiotaomicron; Bacteroides thetaiotaomicron VPI-5482	6	161	0	4816
Bacteroides vulgatus ATCC 8482	Bacteria; Bacteroidetes/Chlorobi group; Bacteroidetes; Bacteroidia; Bacteroidales; Bacteroidaceae; Bacteroides; Bacteroides vulgatus; Bacteroides vulgatus ATCC 8482	2	114	0	4066
Bartonella bacilliformis KC583	Bacteria; Proteobacteria; Alphaproteobacteria; Rhizobiales; Bartonellaceae; Bartonella; Bartonella bacilliformis; Bartonella bacilliformis KC583	0	6	0	1283
Bartonella clarridgeiae 73	Bacteria; Proteobacteria; Alphaproteobacteria; Rhizobiales; Bartonellaceae; Bartonella; Bartonella clarridgeiae; Bartonella clarridgeiae 73	0	6	0	1326
Bartonella grahamii as4aup	Bacteria; Proteobacteria; Alphaproteobacteria; Rhizobiales; Bartonellaceae; Bartonella; Bartonella grahamii; Bartonella grahamii as4aup	0	5	0	1768
Bartonella henselae str. Houston-1	Bacteria; Proteobacteria; Alphaproteobacteria; Rhizobiales; Bartonellaceae; Bartonella; Bartonella henselae; Bartonella henselae str. Houston-1	0	5	0	1488
Bartonella quintana str. Toulouse	Bacteria; Proteobacteria; Alphaproteobacteria; Rhizobiales; Bartonellaceae; Bartonella; Bartonella quintana; Bartonella quintana str. Toulouse	0	5	0	1142
Bartonella tribocorum CIP 105476	Bacteria; Proteobacteria; Alphaproteobacteria; Rhizobiales; Bartonellaceae; Bartonella; Bartonella tribocorum; Bartonella tribocorum CIP 105476	0	7	0	2087
Baumannia cicadellinicola str. Hc (Homalodisca coagulata)	Bacteria; Proteobacteria; Gammaproteobacteria; unclassified Gammaproteobacteria; Candidatus Baumannia; Candidatus Baumannia cicadellinicola; Baumannia cicadellinicola str. Hc (Homalodisca coagulata)	0	1	0	595
Bdellovibrio bacteriovorus HD100	Bacteria; Proteobacteria; delta/epsilon subdivisions; Deltaproteobacteria; Bdellovibrionales; Bdellovibrionaceae; Bdellovibrio; Bdellovibrio bacteriovorus; Bdellovibrio bacteriovorus HD100	4	40	0	3586
Beijerinckia indica subsp. indica ATCC 9039	Bacteria; Proteobacteria; Alphaproteobacteria; Rhizobiales; Beijerinckiaceae; Beijerinckia; Beijerinckia indica; Beijerinckia indica subsp. indica; Beijerinckia indica subsp. indica ATCC 9039	2	26	2	3784
Belliella baltica DSM 15883	Bacteria; Bacteroidetes/Chlorobi group; Bacteroidetes; Cytophagia; Cytophagales; Cyclobacteriaceae; Belliella; Belliella baltica; Belliella baltica DSM 15883	2	54	0	3680
Beutenbergia cavernae DSM 12333	Bacteria; Actinobacteria; Actinobacteria; Actinobacteridae; Actinomycetales; Micrococcineae; Beutenbergiaceae; Beutenbergia; Beutenbergia cavernae; Beutenbergia cavernae DSM 12333	3	18	3	4197
Bifidobacterium adolescentis ATCC 15703	Bacteria; Actinobacteria; Actinobacteria; Actinobacteridae; Bifidobacteriales; Bifidobacteriaceae; Bifidobacterium; Bifidobacterium adolescentis; Bifidobacterium adolescentis ATCC 15703	1	4	0	1632
Bifidobacterium animalis subsp. animalis ATCC 25527	Bacteria; Actinobacteria; Actinobacteria; Actinobacteridae; Bifidobacteriales; Bifidobacteriaceae; Bifidobacterium; Bifidobacterium animalis; Bifidobacterium animalis subsp. animalis; Bifidobacterium animalis subsp. animalis ATCC 25527	1	5	0	1538
Bifidobacterium animalis subsp. lactis AD011	Bacteria; Actinobacteria; Actinobacteria; Actinobacteridae; Bifidobacteriales; Bifidobacteriaceae; Bifidobacterium; Bifidobacterium animalis; Bifidobacterium animalis subsp. lactis; Bifidobacterium animalis subsp. lactis AD011	1	6	0	1527
Bifidobacterium animalis subsp. lactis B420	Bacteria; Actinobacteria; Actinobacteria; Actinobacteridae; Bifidobacteriales; Bifidobacteriaceae; Bifidobacterium; Bifidobacterium animalis; Bifidobacterium animalis subsp. lactis; Bifidobacterium animalis subsp. lactis B420	1	6	0	1561
Bifidobacterium animalis subsp. lactis BB-12	Bacteria; Actinobacteria; Actinobacteria; Actinobacteridae; Bifidobacteriales; Bifidobacteriaceae; Bifidobacterium; Bifidobacterium animalis; Bifidobacterium animalis subsp. lactis; Bifidobacterium animalis subsp. lactis BB-12	1	6	0	1642
Bifidobacterium animalis subsp. lactis Bi-07	Bacteria; Actinobacteria; Actinobacteria; Actinobacteridae; Bifidobacteriales; Bifidobacteriaceae; Bifidobacterium; Bifidobacterium animalis; Bifidobacterium animalis subsp. lactis; Bifidobacterium animalis subsp. lactis Bi-07	1	6	0	1597
Bifidobacterium animalis subsp. lactis Bl-04	Bacteria; Actinobacteria; Actinobacteria; Actinobacteridae; Bifidobacteriales; Bifidobacteriaceae; Bifidobacterium; Bifidobacterium animalis; Bifidobacterium animalis subsp. lactis; Bifidobacterium animalis subsp. lactis Bl-04	1	6	0	1567
Bifidobacterium animalis subsp. lactis BLC1	Bacteria; Actinobacteria; Actinobacteria; Actinobacteridae; Bifidobacteriales; Bifidobacteriaceae; Bifidobacterium; Bifidobacterium animalis; Bifidobacterium animalis subsp. lactis; Bifidobacterium animalis subsp. lactis BLC1	1	6	0	1518
Bifidobacterium animalis subsp. lactis CNCM I-2494	Bacteria; Actinobacteria; Actinobacteria; Actinobacteridae; Bifidobacteriales; Bifidobacteriaceae; Bifidobacterium; Bifidobacterium animalis; Bifidobacterium animalis subsp. lactis; Bifidobacterium animalis subsp. lactis CNCM I-2494	1	6	0	1660
Bifidobacterium animalis subsp. lactis DSM 10140	Bacteria; Actinobacteria; Actinobacteria; Actinobacteridae; Bifidobacteriales; Bifidobacteriaceae; Bifidobacterium; Bifidobacterium animalis; Bifidobacterium animalis subsp. lactis; Bifidobacterium animalis subsp. lactis DSM 10140	1	6	0	1566
Bifidobacterium animalis subsp. lactis V9	Bacteria; Actinobacteria; Actinobacteria; Actinobacteridae; Bifidobacteriales; Bifidobacteriaceae; Bifidobacterium; Bifidobacterium animalis; Bifidobacterium animalis subsp. lactis; Bifidobacterium animalis subsp. lactis V9	1	6	0	1572
Bifidobacterium bifidum BGN4	Bacteria; Actinobacteria; Actinobacteria; Actinobacteridae; Bifidobacteriales; Bifidobacteriaceae; Bifidobacterium; Bifidobacterium bifidum; Bifidobacterium bifidum BGN4	1	3	0	1834
Bifidobacterium bifidum PRL2010	Bacteria; Actinobacteria; Actinobacteria; Actinobacteridae; Bifidobacteriales; Bifidobacteriaceae; Bifidobacterium; Bifidobacterium bifidum; Bifidobacterium bifidum PRL2010	1	4	0	1706
Bifidobacterium bifidum S17	Bacteria; Actinobacteria; Actinobacteria; Actinobacteridae; Bifidobacteriales; Bifidobacteriaceae; Bifidobacterium; Bifidobacterium bifidum; Bifidobacterium bifidum S17	2	4	0	1783
Bifidobacterium breve ACS-071-V-Sch8b	Bacteria; Actinobacteria; Actinobacteria; Actinobacteridae; Bifidobacteriales; Bifidobacteriaceae; Bifidobacterium; Bifidobacterium breve; Bifidobacterium breve ACS-071-V-Sch8b	1	4	0	1826
Bifidobacterium dentium Bd1	Bacteria; Actinobacteria; Actinobacteria; Actinobacteridae; Bifidobacteriales; Bifidobacteriaceae; Bifidobacterium; Bifidobacterium dentium; Bifidobacterium dentium Bd1	2	4	0	2129
Bifidobacterium longum DJO10A	Bacteria; Actinobacteria; Actinobacteria; Actinobacteridae; Bifidobacteriales; Bifidobacteriaceae; Bifidobacterium; Bifidobacterium longum; Bifidobacterium longum DJO10A	2	4	0	2002
Bifidobacterium longum NCC2705	Bacteria; Actinobacteria; Actinobacteria; Actinobacteridae; Bifidobacteriales; Bifidobacteriaceae; Bifidobacterium; Bifidobacterium longum; Bifidobacterium longum NCC2705	0	4	0	1729
Bifidobacterium longum subsp. infantis 157F	Bacteria; Actinobacteria; Actinobacteria; Actinobacteridae; Bifidobacteriales; Bifidobacteriaceae; Bifidobacterium; Bifidobacterium longum; Bifidobacterium longum subsp. infantis; Bifidobacterium longum subsp. infantis 157F	1	4	0	1999
Bifidobacterium longum subsp. infantis ATCC 15697 = JCM 1222	Bacteria; Actinobacteria; Actinobacteria; Actinobacteridae; Bifidobacteriales; Bifidobacteriaceae; Bifidobacterium; Bifidobacterium longum; Bifidobacterium longum subsp. infantis; Bifidobacterium longum subsp. infantis ATCC 15697 = JCM 1222	2	4	0	2416
Bifidobacterium longum subsp. infantis ATCC 15697 = JCM 1222	Bacteria; Actinobacteria; Actinobacteria; Actinobacteridae; Bifidobacteriales; Bifidobacteriaceae; Bifidobacterium; Bifidobacterium longum; Bifidobacterium longum subsp. infantis; Bifidobacterium longum subsp. infantis ATCC 15697 = JCM 1222	2	4	0	2552
Bifidobacterium longum subsp. longum BBMN68	Bacteria; Actinobacteria; Actinobacteria; Actinobacteridae; Bifidobacteriales; Bifidobacteriaceae; Bifidobacterium; Bifidobacterium longum; Bifidobacterium longum subsp. longum; Bifidobacterium longum subsp. longum BBMN68	1	4	0	1806
Bifidobacterium longum subsp. longum JCM 1217	Bacteria; Actinobacteria; Actinobacteria; Actinobacteridae; Bifidobacteriales; Bifidobacteriaceae; Bifidobacterium; Bifidobacterium longum; Bifidobacterium longum subsp. longum; Bifidobacterium longum subsp. longum JCM 1217	2	4	0	1924
Bifidobacterium longum subsp. longum JDM301	Bacteria; Actinobacteria; Actinobacteria; Actinobacteridae; Bifidobacteriales; Bifidobacteriaceae; Bifidobacterium; Bifidobacterium longum; Bifidobacterium longum subsp. longum; Bifidobacterium longum subsp. longum JDM301	1	3	0	1958
Bifidobacterium longum subsp. longum KACC 91563	Bacteria; Actinobacteria; Actinobacteria; Actinobacteridae; Bifidobacteriales; Bifidobacteriaceae; Bifidobacterium; Bifidobacterium longum; Bifidobacterium longum subsp. longum; Bifidobacterium longum subsp. longum KACC 91563	1	4	0	1985
Blastococcus saxobsidens DD2	Bacteria; Actinobacteria; Actinobacteria; Actinobacteridae; Actinomycetales; Frankineae; Geodermatophilaceae; Blastococcus; Blastococcus saxobsidens; Blastococcus saxobsidens DD2	1	19	2	4820
Blattabacterium sp. (Blaberus giganteus)	Bacteria; Bacteroidetes/Chlorobi group; Bacteroidetes; Flavobacteriia; Flavobacteriales; Blattabacteriaceae; Blattabacterium; Blattabacterium sp. (Blaberus giganteus)	0	2	0	576
Blattabacterium sp. (Blattella germanica) str. Bge	Bacteria; Bacteroidetes/Chlorobi group; Bacteroidetes; Flavobacteriia; Flavobacteriales; Blattabacteriaceae; Blattabacterium; Blattabacterium sp. (Blattella germanica); Blattabacterium sp. (Blattella germanica) str. Bge	0	1	0	590
Blattabacterium sp. (Cryptocercus punctulatus) str. Cpu	Bacteria; Bacteroidetes/Chlorobi group; Bacteroidetes; Flavobacteriia; Flavobacteriales; Blattabacteriaceae; Blattabacterium; Blattabacterium punctulatus; Blattabacterium sp. (Cryptocercus punctulatus) str. Cpu	0	3	0
Blattabacterium sp. (Mastotermes darwiniensis) str. MADAR	Bacteria; Bacteroidetes/Chlorobi group; Bacteroidetes; Flavobacteriia; Flavobacteriales; Blattabacteriaceae; Blattabacterium; Blattabacterium sp. (Mastotermes darwiniensis); Blattabacterium sp. (Mastotermes darwiniensis) str. MADAR	0	2	0	541
Blattabacterium sp. (Periplaneta americana) str. BPLAN	Bacteria; Bacteroidetes/Chlorobi group; Bacteroidetes; Flavobacteriia; Flavobacteriales; Blattabacteriaceae; Blattabacterium; Blattabacterium sp. (Periplaneta americana); Blattabacterium sp. (Periplaneta americana) str. BPLAN	0	2	0	581
Bordetella avium 197N	Bacteria; Proteobacteria; Betaproteobacteria; Burkholderiales; Alcaligenaceae; Bordetella; Bordetella avium; Bordetella avium 197N	0	13	3	3381
Bordetella bronchiseptica RB50	Bacteria; Proteobacteria; Betaproteobacteria; Burkholderiales; Alcaligenaceae; Bordetella; Bordetella bronchiseptica; Bordetella bronchiseptica RB50	1	25	2	4994
Bordetella parapertussis 12822	Bacteria; Proteobacteria; Betaproteobacteria; Burkholderiales; Alcaligenaceae; Bordetella; Bordetella parapertussis; Bordetella parapertussis 12822	1	21	2	4185
Bordetella pertussis CS	Bacteria; Proteobacteria; Betaproteobacteria; Burkholderiales; Alcaligenaceae; Bordetella; Bordetella pertussis; Bordetella pertussis CS	1	20	2	3456
Bordetella pertussis Tohama I	Bacteria; Proteobacteria; Betaproteobacteria; Burkholderiales; Alcaligenaceae; Bordetella; Bordetella pertussis; Bordetella pertussis Tohama I	1	20	2	3436
Bordetella petrii DSM 12804	Bacteria; Proteobacteria; Betaproteobacteria; Burkholderiales; Alcaligenaceae; Bordetella; Bordetella petrii; Bordetella petrii DSM 12804	1	18	1	5027
Borrelia afzelii PKo	Bacteria; Spirochaetes; Spirochaetia; Spirochaetales; Spirochaetaceae; Borrelia; Borrelia burgdorferi group; Borrelia afzelii; Borrelia afzelii PKo	1	20	2	1454
Borrelia afzelii PKo	Bacteria; Spirochaetes; Spirochaetia; Spirochaetales; Spirochaetaceae; Borrelia; Borrelia burgdorferi group; Borrelia afzelii; Borrelia afzelii PKo	1	20	2	1271
Borrelia bissettii DN127	Bacteria; Spirochaetes; Spirochaetia; Spirochaetales; Spirochaetaceae; Borrelia; Borrelia burgdorferi group; Borrelia bissettii; Borrelia bissettii DN127	1	20	2	1463
Borrelia burgdorferi B31	Bacteria; Spirochaetes; Spirochaetia; Spirochaetales; Spirochaetaceae; Borrelia; Borrelia burgdorferi group; Borrelia burgdorferi; Borrelia burgdorferi B31	1	19	2	1346
Borrelia burgdorferi JD1	Bacteria; Spirochaetes; Spirochaetia; Spirochaetales; Spirochaetaceae; Borrelia; Borrelia burgdorferi group; Borrelia burgdorferi; Borrelia burgdorferi JD1	1	19	2	1458
Borrelia burgdorferi N40	Bacteria; Spirochaetes; Spirochaetia; Spirochaetales; Spirochaetaceae; Borrelia; Borrelia burgdorferi group; Borrelia burgdorferi; Borrelia burgdorferi N40	1	21	2	1242
Borrelia burgdorferi ZS7	Bacteria; Spirochaetes; Spirochaetia; Spirochaetales; Spirochaetaceae; Borrelia; Borrelia burgdorferi group; Borrelia burgdorferi; Borrelia burgdorferi ZS7	1	19	2	1239
Borrelia crocidurae str. Achema	Bacteria; Spirochaetes; Spirochaetia; Spirochaetales; Spirochaetaceae; Borrelia; Borrelia crocidurae; Borrelia crocidurae str. Achema	1	22	1	1470
Borrelia duttonii Ly	Bacteria; Spirochaetes; Spirochaetia; Spirochaetales; Spirochaetaceae; Borrelia; Borrelia duttonii; Borrelia duttonii Ly	1	22	3	1305
Borrelia garinii BgVir	Bacteria; Spirochaetes; Spirochaetia; Spirochaetales; Spirochaetaceae; Borrelia; Borrelia burgdorferi group; Borrelia garinii; Borrelia garinii BgVir	1	19	2	956
Borrelia garinii PBi	Bacteria; Spirochaetes; Spirochaetia; Spirochaetales; Spirochaetaceae; Borrelia; Borrelia burgdorferi group; Borrelia bavariensis; Borrelia garinii PBi	1	20	2	1355
Borrelia hermsii DAH	Bacteria; Spirochaetes; Spirochaetia; Spirochaetales; Spirochaetaceae; Borrelia; Borrelia hermsii; Borrelia hermsii DAH	1	22	2	825
Borrelia recurrentis A1	Bacteria; Spirochaetes; Spirochaetia; Spirochaetales; Spirochaetaceae; Borrelia; Borrelia recurrentis; Borrelia recurrentis A1	1	21	3	990
Borrelia turicatae 91E135	Bacteria; Spirochaetes; Spirochaetia; Spirochaetales; Spirochaetaceae; Borrelia; Borrelia turicatae; Borrelia turicatae 91E135	1	21	1	818
Brachybacterium faecium DSM 4810	Bacteria; Actinobacteria; Actinobacteria; Actinobacteridae; Actinomycetales; Micrococcineae; Dermabacteraceae; Brachybacterium; Brachybacterium faecium; Brachybacterium faecium DSM 4810	0	3	1	3068
Brachyspira hyodysenteriae WA1	Bacteria; Spirochaetes; Spirochaetia; Spirochaetales; Brachyspiraceae; Brachyspira; Brachyspira hyodysenteriae; Brachyspira hyodysenteriae WA1	5	70	60	2642
Brachyspira intermedia PWS/A	Bacteria; Spirochaetes; Spirochaetia; Spirochaetales; Brachyspiraceae; Brachyspira; Brachyspira intermedia; Brachyspira intermedia PWS/A	5	80	57	2872
Brachyspira murdochii DSM 12563	Bacteria; Spirochaetes; Spirochaetia; Spirochaetales; Brachyspiraceae; Brachyspira; Brachyspira murdochii; Brachyspira murdochii DSM 12563	6	61	48	2809
Brachyspira pilosicoli 95/1000	Bacteria; Spirochaetes; Spirochaetia; Spirochaetales; Brachyspiraceae; Brachyspira; Brachyspira pilosicoli; Brachyspira pilosicoli 95/1000	4	51	32	2299
Bradyrhizobium japonicum USDA 110	Bacteria; Proteobacteria; Alphaproteobacteria; Rhizobiales; Bradyrhizobiaceae; Bradyrhizobium; Bradyrhizobium japonicum; Bradyrhizobium japonicum USDA 110	2	64	1	8317
Bradyrhizobium japonicum USDA 6	Bacteria; Proteobacteria; Alphaproteobacteria; Rhizobiales; Bradyrhizobiaceae; Bradyrhizobium; Bradyrhizobium japonicum; Bradyrhizobium japonicum USDA 6	3	76	1	8826
Bradyrhizobium sp. BTAi1	Bacteria; Proteobacteria; Alphaproteobacteria; Rhizobiales; Bradyrhizobiaceae; Bradyrhizobium; Bradyrhizobium sp. BTAi1	4	52	1	7621
Bradyrhizobium sp. ORS 278	Bacteria; Proteobacteria; Alphaproteobacteria; Rhizobiales; Bradyrhizobiaceae; Bradyrhizobium; Bradyrhizobium sp. ORS 278	2	49	3	6717
Bradyrhizobium sp. S23321	Bacteria; Proteobacteria; Alphaproteobacteria; Rhizobiales; Bradyrhizobiaceae; Bradyrhizobium; Bradyrhizobium sp. S23321	3	48	1	6892
Brevibacillus brevis NBRC 100599	Bacteria; Firmicutes; Bacilli; Bacillales; Paenibacillaceae; Brevibacillus; Brevibacillus brevis; Brevibacillus brevis NBRC 100599	7	35	5	5947
Brevundimonas subvibrioides ATCC 15264	Bacteria; Proteobacteria; Alphaproteobacteria; Caulobacterales; Caulobacteraceae; Brevundimonas; Brevundimonas subvibrioides; Brevundimonas subvibrioides ATCC 15264	2	14	0	3327
Brucella abortus A13334	Bacteria; Proteobacteria; Alphaproteobacteria; Rhizobiales; Brucellaceae; Brucella; Brucella abortus; Brucella abortus A13334	1	12	0	3338
Brucella abortus bv. 1 str. 9-941	Bacteria; Proteobacteria; Alphaproteobacteria; Rhizobiales; Brucellaceae; Brucella; Brucella abortus; Brucella abortus bv. 1; Brucella abortus bv. 1 str. 9-941	1	12	0	3084
Brucella abortus S19	Bacteria; Proteobacteria; Alphaproteobacteria; Rhizobiales; Brucellaceae; Brucella; Brucella abortus; Brucella abortus S19	1	12	0	3000
Brucella canis ATCC 23365	Bacteria; Proteobacteria; Alphaproteobacteria; Rhizobiales; Brucellaceae; Brucella; Brucella canis; Brucella canis ATCC 23365	1	12	0	3251
Brucella canis HSK A52141	Bacteria; Proteobacteria; Alphaproteobacteria; Rhizobiales; Brucellaceae; Brucella; Brucella canis; Brucella canis HSK A52141	1	12	0	3280
Brucella melitensis ATCC 23457	Bacteria; Proteobacteria; Alphaproteobacteria; Rhizobiales; Brucellaceae; Brucella; Brucella melitensis; Brucella melitensis bv. 2; Brucella melitensis ATCC 23457	1	12	0	3135
Brucella melitensis biovar Abortus 2308	Bacteria; Proteobacteria; Alphaproteobacteria; Rhizobiales; Brucellaceae; Brucella; Brucella abortus; Brucella melitensis biovar Abortus 2308	1	11	0	3034
Brucella melitensis bv. 1 str. 16M	Bacteria; Proteobacteria; Alphaproteobacteria; Rhizobiales; Brucellaceae; Brucella; Brucella melitensis; Brucella melitensis bv. 1; Brucella melitensis bv. 1 str. 16M	1	12	0	3198
Brucella melitensis M28	Bacteria; Proteobacteria; Alphaproteobacteria; Rhizobiales; Brucellaceae; Brucella; Brucella melitensis; Brucella melitensis M28	1	12	0	3363
Brucella melitensis M5-90	Bacteria; Proteobacteria; Alphaproteobacteria; Rhizobiales; Brucellaceae; Brucella; Brucella melitensis; Brucella melitensis M28; Brucella melitensis M5-90	1	12	0	3358
Brucella melitensis NI	Bacteria; Proteobacteria; Alphaproteobacteria; Rhizobiales; Brucellaceae; Brucella; Brucella melitensis; Brucella melitensis NI	1	12	0	3229
Brucella microti CCM 4915	Bacteria; Proteobacteria; Alphaproteobacteria; Rhizobiales; Brucellaceae; Brucella; Brucella microti; Brucella microti CCM 4915	1	12	0	3282
Brucella ovis ATCC 25840	Bacteria; Proteobacteria; Alphaproteobacteria; Rhizobiales; Brucellaceae; Brucella; Brucella ovis; Brucella ovis ATCC 25840	1	11	0	2890
Brucella pinnipedialis B2/94	Bacteria; Proteobacteria; Alphaproteobacteria; Rhizobiales; Brucellaceae; Brucella; Brucella pinnipedialis; Brucella pinnipedialis B2/94	1	12	0	3324
Brucella suis 1330	Bacteria; Proteobacteria; Alphaproteobacteria; Rhizobiales; Brucellaceae; Brucella; Brucella suis; Brucella suis 1330	1	12	0	3271
Brucella suis 1330	Bacteria; Proteobacteria; Alphaproteobacteria; Rhizobiales; Brucellaceae; Brucella; Brucella suis; Brucella suis 1330	1	12	0	3266
Brucella suis ATCC 23445	Bacteria; Proteobacteria; Alphaproteobacteria; Rhizobiales; Brucellaceae; Brucella; Brucella suis; Brucella suis bv. 2; Brucella suis ATCC 23445	1	12	0	3241
Brucella suis VBI22	Bacteria; Proteobacteria; Alphaproteobacteria; Rhizobiales; Brucellaceae; Brucella; Brucella suis; Brucella suis VBI22	1	12	0	3270
Buchnera aphidicola (Cinara tujafilina)	Bacteria; Proteobacteria; Gammaproteobacteria; Enterobacteriales; Enterobacteriaceae; Buchnera; Buchnera aphidicola; Buchnera aphidicola (Cinara tujafilina)	0	1	0	360
Buchnera aphidicola BCc	Bacteria; Proteobacteria; Gammaproteobacteria; Enterobacteriales; Enterobacteriaceae; Buchnera; Buchnera aphidicola; Buchnera aphidicola (Cinara cedri); Buchnera aphidicola BCc	0	0	0	362
Buchnera aphidicola str. 5A (Acyrthosiphon pisum)	Bacteria; Proteobacteria; Gammaproteobacteria; Enterobacteriales; Enterobacteriaceae; Buchnera; Buchnera aphidicola; Buchnera aphidicola (Acyrthosiphon pisum); Buchnera aphidicola str. APS (Acyrthosiphon pisum); Buchnera aphidicola str. 5A (Acyrthosiphon pisum)	0	2	0	555
Buchnera aphidicola str. Ak (Acyrthosiphon kondoi)	Bacteria; Proteobacteria; Gammaproteobacteria; Enterobacteriales; Enterobacteriaceae; Buchnera; Buchnera aphidicola; Buchnera aphidicola (Acyrthosiphon kondoi); Buchnera aphidicola str. Ak (Acyrthosiphon kondoi)	0	2	0	569
Buchnera aphidicola str. APS (Acyrthosiphon pisum)	Bacteria; Proteobacteria; Gammaproteobacteria; Enterobacteriales; Enterobacteriaceae; Buchnera; Buchnera aphidicola; Buchnera aphidicola (Acyrthosiphon pisum); Buchnera aphidicola str. APS (Acyrthosiphon pisum)	0	2	0	574
Buchnera aphidicola str. Bp (Baizongia pistaciae)	Bacteria; Proteobacteria; Gammaproteobacteria; Enterobacteriales; Enterobacteriaceae; Buchnera; Buchnera aphidicola; Buchnera aphidicola (Baizongia pistaciae); Buchnera aphidicola str. Bp (Baizongia pistaciae)	0	2	0	507
Buchnera aphidicola str. JF98 (Acyrthosiphon pisum)	Bacteria; Proteobacteria; Gammaproteobacteria; Enterobacteriales; Enterobacteriaceae; Buchnera; Buchnera aphidicola; Buchnera aphidicola (Acyrthosiphon pisum); Buchnera aphidicola str. JF98 (Acyrthosiphon pisum)	0	2	0	477
Buchnera aphidicola str. LL01 (Acyrthosiphon pisum)	Bacteria; Proteobacteria; Gammaproteobacteria; Enterobacteriales; Enterobacteriaceae; Buchnera; Buchnera aphidicola; Buchnera aphidicola (Acyrthosiphon pisum); Buchnera aphidicola str. LL01 (Acyrthosiphon pisum)	0	2	0	590
Buchnera aphidicola str. Sg (Schizaphis graminum)	Bacteria; Proteobacteria; Gammaproteobacteria; Enterobacteriales; Enterobacteriaceae; Buchnera; Buchnera aphidicola; Buchnera aphidicola (Schizaphis graminum); Buchnera aphidicola str. Sg (Schizaphis graminum)	0	1	0	546
Buchnera aphidicola str. TLW03 (Acyrthosiphon pisum)	Bacteria; Proteobacteria; Gammaproteobacteria; Enterobacteriales; Enterobacteriaceae; Buchnera; Buchnera aphidicola; Buchnera aphidicola (Acyrthosiphon pisum); Buchnera aphidicola str. TLW03 (Acyrthosiphon pisum)	0	2	0	573
Buchnera aphidicola str. Tuc7 (Acyrthosiphon pisum)	Bacteria; Proteobacteria; Gammaproteobacteria; Enterobacteriales; Enterobacteriaceae; Buchnera; Buchnera aphidicola; Buchnera aphidicola (Acyrthosiphon pisum); Buchnera aphidicola str. Tuc7 (Acyrthosiphon pisum)	0	2	0	553
Buchnera aphidicola str. Ua (Uroleucon ambrosiae)	Bacteria; Proteobacteria; Gammaproteobacteria; Enterobacteriales; Enterobacteriaceae; Buchnera; Buchnera aphidicola; Buchnera aphidicola (Uroleucon ambrosiae); Buchnera aphidicola str. Ua (Uroleucon ambrosiae)	0	0	0	538
Burkholderia ambifaria AMMD	Bacteria; Proteobacteria; Betaproteobacteria; Burkholderiales; Burkholderiaceae; Burkholderia; Burkholderia cepacia complex; Burkholderia ambifaria; Burkholderia ambifaria AMMD	1	28	1	6610
Burkholderia ambifaria MC40-6	Bacteria; Proteobacteria; Betaproteobacteria; Burkholderiales; Burkholderiaceae; Burkholderia; Burkholderia cepacia complex; Burkholderia ambifaria; Burkholderia ambifaria MC40-6	1	30	1	6697
Burkholderia cenocepacia AU 1054	Bacteria; Proteobacteria; Betaproteobacteria; Burkholderiales; Burkholderiaceae; Burkholderia; Burkholderia cepacia complex; Burkholderia cenocepacia; Burkholderia cenocepacia AU 1054	1	23	3	6477
Burkholderia cenocepacia HI2424	Bacteria; Proteobacteria; Betaproteobacteria; Burkholderiales; Burkholderiaceae; Burkholderia; Burkholderia cepacia complex; Burkholderia cenocepacia; Burkholderia cenocepacia HI2424	1	23	4	6919
Burkholderia cenocepacia J2315	Bacteria; Proteobacteria; Betaproteobacteria; Burkholderiales; Burkholderiaceae; Burkholderia; Burkholderia cepacia complex; Burkholderia cenocepacia; Burkholderia cenocepacia J2315	1	23	6	7116
Burkholderia cenocepacia MC0-3	Bacteria; Proteobacteria; Betaproteobacteria; Burkholderiales; Burkholderiaceae; Burkholderia; Burkholderia cepacia complex; Burkholderia cenocepacia; Burkholderia cenocepacia MC0-3	1	25	5	7008
Burkholderia gladioli BSR3	Bacteria; Proteobacteria; Betaproteobacteria; Burkholderiales; Burkholderiaceae; Burkholderia; Burkholderia gladioli; Burkholderia gladioli BSR3	3	31	3	7411
Burkholderia glumae BGR1	Bacteria; Proteobacteria; Betaproteobacteria; Burkholderiales; Burkholderiaceae; Burkholderia; Burkholderia glumae; Burkholderia glumae BGR1	2	25	5	5773
Burkholderia mallei ATCC 23344	Bacteria; Proteobacteria; Betaproteobacteria; Burkholderiales; Burkholderiaceae; Burkholderia; pseudomallei group; Burkholderia mallei; Burkholderia mallei ATCC 23344	0	18	1	5023
Burkholderia mallei NCTC 10229	Bacteria; Proteobacteria; Betaproteobacteria; Burkholderiales; Burkholderiaceae; Burkholderia; pseudomallei group; Burkholderia mallei; Burkholderia mallei NCTC 10229	1	20	1	5509
Burkholderia mallei NCTC 10247	Bacteria; Proteobacteria; Betaproteobacteria; Burkholderiales; Burkholderiaceae; Burkholderia; pseudomallei group; Burkholderia mallei; Burkholderia mallei NCTC 10247	1	18	1	5415
Burkholderia mallei SAVP1	Bacteria; Proteobacteria; Betaproteobacteria; Burkholderiales; Burkholderiaceae; Burkholderia; pseudomallei group; Burkholderia mallei; Burkholderia mallei SAVP1	0	17	1	5184
Burkholderia multivorans ATCC 17616	Bacteria; Proteobacteria; Betaproteobacteria; Burkholderiales; Burkholderiaceae; Burkholderia; Burkholderia cepacia complex; Burkholderia multivorans; Burkholderia multivorans ATCC 17616	1	18	2	6111
Burkholderia multivorans ATCC 17616	Bacteria; Proteobacteria; Betaproteobacteria; Burkholderiales; Burkholderiaceae; Burkholderia; Burkholderia cepacia complex; Burkholderia multivorans; Burkholderia multivorans ATCC 17616	1	17	2	6258
Burkholderia phymatum STM815	Bacteria; Proteobacteria; Betaproteobacteria; Burkholderiales; Burkholderiaceae; Burkholderia; Burkholderia phymatum; Burkholderia phymatum STM815	2	40	3	7496
Burkholderia phytofirmans PsJN	Bacteria; Proteobacteria; Betaproteobacteria; Burkholderiales; Burkholderiaceae; Burkholderia; Burkholderia phytofirmans; Burkholderia phytofirmans PsJN	2	35	2	7241
Burkholderia pseudomallei 1026b	Bacteria; Proteobacteria; Betaproteobacteria; Burkholderiales; Burkholderiaceae; Burkholderia; pseudomallei group; Burkholderia pseudomallei; Burkholderia pseudomallei 1026b	1	25	1	6070
Burkholderia pseudomallei 1106a	Bacteria; Proteobacteria; Betaproteobacteria; Burkholderiales; Burkholderiaceae; Burkholderia; pseudomallei group; Burkholderia pseudomallei; Burkholderia pseudomallei 1106a	1	26	1	6148
Burkholderia pseudomallei 1710b	Bacteria; Proteobacteria; Betaproteobacteria; Burkholderiales; Burkholderiaceae; Burkholderia; pseudomallei group; Burkholderia pseudomallei; Burkholderia pseudomallei 1710b	1	25	1	6344
Burkholderia pseudomallei 668	Bacteria; Proteobacteria; Betaproteobacteria; Burkholderiales; Burkholderiaceae; Burkholderia; pseudomallei group; Burkholderia pseudomallei; Burkholderia pseudomallei 668	1	25	1	7116
Burkholderia pseudomallei K96243	Bacteria; Proteobacteria; Betaproteobacteria; Burkholderiales; Burkholderiaceae; Burkholderia; pseudomallei group; Burkholderia pseudomallei; Burkholderia pseudomallei K96243	1	27	1	5728
Burkholderia pseudomallei MSHR346	Bacteria; Proteobacteria; Betaproteobacteria; Burkholderiales; Burkholderiaceae; Burkholderia; pseudomallei group; Burkholderia pseudomallei; Burkholderia pseudomallei MSHR346	1	20	1	7582
Burkholderia rhizoxinica HKI 454	Bacteria; Proteobacteria; Betaproteobacteria; Burkholderiales; Burkholderiaceae; Burkholderia; Burkholderia rhizoxinica; Burkholderia rhizoxinica HKI 454	0	10	4	3870
Burkholderia sp. 383	Bacteria; Proteobacteria; Betaproteobacteria; Burkholderiales; Burkholderiaceae; Burkholderia; Burkholderia cepacia complex; Burkholderia sp. 383	1	38	6	7716
Burkholderia sp. CCGE1001	Bacteria; Proteobacteria; Betaproteobacteria; Burkholderiales; Burkholderiaceae; Burkholderia; Burkholderia sp. CCGE1001	2	33	2	5965
Burkholderia sp. CCGE1002	Bacteria; Proteobacteria; Betaproteobacteria; Burkholderiales; Burkholderiaceae; Burkholderia; Burkholderia sp. CCGE1002	1	32	5	6889
Burkholderia sp. CCGE1003	Bacteria; Proteobacteria; Betaproteobacteria; Burkholderiales; Burkholderiaceae; Burkholderia; Burkholderia sp. CCGE1003	1	34	3	5988
Burkholderia sp. KJ006	Bacteria; Proteobacteria; Betaproteobacteria; Burkholderiales; Burkholderiaceae; Burkholderia; Burkholderia sp. KJ006	1	27	5	6024
Burkholderia sp. YI23	Bacteria; Proteobacteria; Betaproteobacteria; Burkholderiales; Burkholderiaceae; Burkholderia; Burkholderia sp. YI23	2	33	3	7804
Burkholderia thailandensis E264	Bacteria; Proteobacteria; Betaproteobacteria; Burkholderiales; Burkholderiaceae; Burkholderia; pseudomallei group; Burkholderia thailandensis; Burkholderia thailandensis E264	1	21	1	5632
Burkholderia vietnamiensis G4	Bacteria; Proteobacteria; Betaproteobacteria; Burkholderiales; Burkholderiaceae; Burkholderia; Burkholderia cepacia complex; Burkholderia vietnamiensis; Burkholderia vietnamiensis G4	1	26	37	7617
Burkholderia xenovorans LB400	Bacteria; Proteobacteria; Betaproteobacteria; Burkholderiales; Burkholderiaceae; Burkholderia; Burkholderia xenovorans; Burkholderia xenovorans LB400	2	38	6	8702
Butyrivibrio proteoclasticus B316	Bacteria; Firmicutes; Clostridia; Clostridiales; Lachnospiraceae; Butyrivibrio; Clostridium proteoclasticum; Butyrivibrio proteoclasticus B316	1	16	1	3811
Caldicellulosiruptor bescii DSM 6725	Bacteria; Firmicutes; Clostridia; Thermoanaerobacterales; Thermoanaerobacterales Family III. Incertae Sedis; Caldicellulosiruptor; Caldicellulosiruptor bescii; Caldicellulosiruptor bescii DSM 6725	3	9	0	2666
Caldicellulosiruptor hydrothermalis 108	Bacteria; Firmicutes; Clostridia; Thermoanaerobacterales; Thermoanaerobacterales Family III. Incertae Sedis; Caldicellulosiruptor; Caldicellulosiruptor hydrothermalis; Caldicellulosiruptor hydrothermalis 108	0	7	0	2546
Caldicellulosiruptor kristjanssonii 177R1B	Bacteria; Firmicutes; Clostridia; Thermoanaerobacterales; Thermoanaerobacterales Family III. Incertae Sedis; Caldicellulosiruptor; Caldicellulosiruptor kristjanssonii; Caldicellulosiruptor kristjanssonii 177R1B	2	12	0	2482
Caldicellulosiruptor kronotskyensis 2002	Bacteria; Firmicutes; Clostridia; Thermoanaerobacterales; Thermoanaerobacterales Family III. Incertae Sedis; Caldicellulosiruptor; Caldicellulosiruptor kronotskyensis; Caldicellulosiruptor kronotskyensis 2002	2	10	0	2466
Caldicellulosiruptor lactoaceticus 6A	Bacteria; Firmicutes; Clostridia; Thermoanaerobacterales; Thermoanaerobacterales Family III. Incertae Sedis; Caldicellulosiruptor; Caldicellulosiruptor lactoaceticus; Caldicellulosiruptor lactoaceticus 6A	3	10	0	2318
Caldicellulosiruptor obsidiansis OB47	Bacteria; Firmicutes; Clostridia; Thermoanaerobacterales; Thermoanaerobacterales Family III. Incertae Sedis; Caldicellulosiruptor; Caldicellulosiruptor obsidiansis; Caldicellulosiruptor obsidiansis OB47	2	9	0	2188
Caldicellulosiruptor owensensis OL	Bacteria; Firmicutes; Clostridia; Thermoanaerobacterales; Thermoanaerobacterales Family III. Incertae Sedis; Caldicellulosiruptor; Caldicellulosiruptor owensensis; Caldicellulosiruptor owensensis OL	2	7	0	2147
Caldicellulosiruptor saccharolyticus DSM 8903	Bacteria; Firmicutes; Clostridia; Thermoanaerobacterales; Thermoanaerobacterales Family III. Incertae Sedis; Caldicellulosiruptor; Caldicellulosiruptor saccharolyticus; Caldicellulosiruptor saccharolyticus DSM 8903	1	8	0	2682
Caldilinea aerophila DSM 14535 = NBRC 104270	Bacteria; Chloroflexi; Caldilineae; Caldilineales; Caldilineaceae; Caldilinea; Caldilinea aerophila; Caldilinea aerophila DSM 14535	3	37	0	4119
Caldisericum exile AZM16c01	Bacteria; Caldiserica; Caldisericia; Caldisericales; Caldisericaceae; Caldisericum; Caldisericum exile; Caldisericum exile AZM16c01	0	6	0	1581
Calditerrivibrio nitroreducens DSM 19672	Bacteria; Deferribacteres; Deferribacteres; Deferribacterales; Deferribacteraceae; Calditerrivibrio; Calditerrivibrio nitroreducens; Calditerrivibrio nitroreducens DSM 19672	1	21	0	2100
Campylobacter concisus 13826	Bacteria; Proteobacteria; delta/epsilon subdivisions; Epsilonproteobacteria; Campylobacterales; Campylobacteraceae; Campylobacter; Campylobacter concisus; Campylobacter concisus 13826	1	8	2	1989
Campylobacter curvus 525.92	Bacteria; Proteobacteria; delta/epsilon subdivisions; Epsilonproteobacteria; Campylobacterales; Campylobacteraceae; Campylobacter; Campylobacter curvus; Campylobacter curvus 525.92	2	7	2	1934
Campylobacter fetus subsp. fetus 82-40	Bacteria; Proteobacteria; delta/epsilon subdivisions; Epsilonproteobacteria; Campylobacterales; Campylobacteraceae; Campylobacter; Campylobacter fetus; Campylobacter fetus subsp. fetus; Campylobacter fetus subsp. fetus 82-40	0	6	2	1719
Campylobacter hominis ATCC BAA-381	Bacteria; Proteobacteria; delta/epsilon subdivisions; Epsilonproteobacteria; Campylobacterales; Campylobacteraceae; Campylobacter; Campylobacter hominis; Campylobacter hominis ATCC BAA-381	0	5	3	1687
Campylobacter jejuni RM1221	Bacteria; Proteobacteria; delta/epsilon subdivisions; Epsilonproteobacteria; Campylobacterales; Campylobacteraceae; Campylobacter; Campylobacter jejuni; Campylobacter jejuni RM1221	0	6	2	1838
Campylobacter jejuni subsp. doylei 269.97	Bacteria; Proteobacteria; delta/epsilon subdivisions; Epsilonproteobacteria; Campylobacterales; Campylobacteraceae; Campylobacter; Campylobacter jejuni; Campylobacter jejuni subsp. doylei; Campylobacter jejuni subsp. doylei 269.97	0	7	2	1731
Campylobacter jejuni subsp. jejuni 81-176	Bacteria; Proteobacteria; delta/epsilon subdivisions; Epsilonproteobacteria; Campylobacterales; Campylobacteraceae; Campylobacter; Campylobacter jejuni; Campylobacter jejuni subsp. jejuni; Campylobacter jejuni subsp. jejuni 81-176	0	6	2	1758
Campylobacter jejuni subsp. jejuni 81116	Bacteria; Proteobacteria; delta/epsilon subdivisions; Epsilonproteobacteria; Campylobacterales; Campylobacteraceae; Campylobacter; Campylobacter jejuni; Campylobacter jejuni subsp. jejuni; Campylobacter jejuni subsp. jejuni 81116	0	5	3	1626
Campylobacter jejuni subsp. jejuni IA3902	Bacteria; Proteobacteria; delta/epsilon subdivisions; Epsilonproteobacteria; Campylobacterales; Campylobacteraceae; Campylobacter; Campylobacter jejuni; Campylobacter jejuni subsp. jejuni; Campylobacter jejuni subsp. jejuni IA3902	0	9	2	1666
Campylobacter jejuni subsp. jejuni ICDCCJ07001	Bacteria; Proteobacteria; delta/epsilon subdivisions; Epsilonproteobacteria; Campylobacterales; Campylobacteraceae; Campylobacter; Campylobacter jejuni; Campylobacter jejuni subsp. jejuni; Campylobacter jejuni subsp. jejuni ICDCCJ07001	0	5	2	1534
Campylobacter jejuni subsp. jejuni M1	Bacteria; Proteobacteria; delta/epsilon subdivisions; Epsilonproteobacteria; Campylobacterales; Campylobacteraceae; Campylobacter; Campylobacter jejuni; Campylobacter jejuni subsp. jejuni; Campylobacter jejuni subsp. jejuni M1	0	5	3	1622
Campylobacter jejuni subsp. jejuni NCTC 11168 = ATCC 700819	Bacteria; Proteobacteria; delta/epsilon subdivisions; Epsilonproteobacteria; Campylobacterales; Campylobacteraceae; Campylobacter; Campylobacter jejuni; Campylobacter jejuni subsp. jejuni; Campylobacter jejuni subsp. jejuni NCTC 11168 = ATCC 700819	0	7	2	1623
Campylobacter jejuni subsp. jejuni S3	Bacteria; Proteobacteria; delta/epsilon subdivisions; Epsilonproteobacteria; Campylobacterales; Campylobacteraceae; Campylobacter; Campylobacter jejuni; Campylobacter jejuni subsp. jejuni; Campylobacter jejuni subsp. jejuni S3	0	6	3	1783
Campylobacter lari RM2100	Bacteria; Proteobacteria; delta/epsilon subdivisions; Epsilonproteobacteria; Campylobacterales; Campylobacteraceae; Campylobacter; Campylobacter lari; Campylobacter lari RM2100	0	10	2	1545
Candidatus Accumulibacter phosphatis clade IIA str. UW-1	Bacteria; Proteobacteria; Betaproteobacteria; unclassified Betaproteobacteria; Candidatus Accumulibacter; Candidatus Accumulibacter phosphatis; Candidatus Accumulibacter phosphatis clade IIA str. UW-1	3	37	5	4562
Candidatus Amoebophilus asiaticus 5a2	Bacteria; Bacteroidetes/Chlorobi group; Bacteroidetes; unclassified Bacteroidetes; Candidatus Amoebophilus; Candidatus Amoebophilus asiaticus; Candidatus Amoebophilus asiaticus 5a2	4	17	46	1334
Candidatus Arthromitus sp. SFB-mouse-Japan	Bacteria; Firmicutes; Clostridia; Clostridiales; Clostridiaceae; Candidatus Arthromitus; Candidatus Arthromitus sp. SFB-mouse; Candidatus Arthromitus sp. SFB-mouse-Japan	0	6	0	1491
Candidatus Arthromitus sp. SFB-mouse-Yit	Bacteria; Firmicutes; Clostridia; Clostridiales; Clostridiaceae; Candidatus Arthromitus; Candidatus Arthromitus sp. SFB-mouse; Candidatus Arthromitus sp. SFB-mouse-Yit	0	6	0	1415
Candidatus Arthromitus sp. SFB-rat-Yit	Bacteria; Firmicutes; Clostridia; Clostridiales; Clostridiaceae; Candidatus Arthromitus; Candidatus Arthromitus sp. SFB-rat-Yit	0	4	0	1343
Candidatus Azobacteroides pseudotrichonymphae genomovar. CFP2	Bacteria; Bacteroidetes/Chlorobi group; Bacteroidetes; Bacteroidia; Bacteroidales; unclassified Bacteroidales; Candidatus Azobacteroides; Candidatus Azobacteroides pseudotrichonymphae; Candidatus Azobacteroides pseudotrichonymphae genomovar. CFP2	1	6	0	852
Candidatus Blochmannia floridanus	Bacteria; Proteobacteria; Gammaproteobacteria; Enterobacteriales; Enterobacteriaceae; unclassified Enterobacteriaceae; ant, tsetse, mealybug, aphid, etc. endosymbionts; ant endosymbionts; Candidatus Blochmannia; Candidatus Blochmannia floridanus	0	2	0	583
Candidatus Blochmannia pennsylvanicus str. BPEN	Bacteria; Proteobacteria; Gammaproteobacteria; Enterobacteriales; Enterobacteriaceae; unclassified Enterobacteriaceae; ant, tsetse, mealybug, aphid, etc. endosymbionts; ant endosymbionts; Candidatus Blochmannia; Candidatus Blochmannia pennsylvanicus; Candidatus Blochmannia pennsylvanicus str. BPEN	0	2	0	610
Candidatus Blochmannia vafer str. BVAF	Bacteria; Proteobacteria; Gammaproteobacteria; Enterobacteriales; Enterobacteriaceae; unclassified Enterobacteriaceae; ant, tsetse, mealybug, aphid, etc. endosymbionts; ant endosymbionts; Candidatus Blochmannia; Candidatus Blochmannia vafer; Candidatus Blochmannia vafer str. BVAF	0	2	0	587
Candidatus Carsonella ruddii CE isolate Thao2000	Bacteria; Proteobacteria; Gammaproteobacteria; unclassified Gammaproteobacteria; Candidatus Carsonella; Candidatus Carsonella ruddii; Candidatus Carsonella ruddii CE isolate Thao2000	0	0	0
Candidatus Carsonella ruddii CS isolate Thao2000	Bacteria; Proteobacteria; Gammaproteobacteria; unclassified Gammaproteobacteria; Candidatus Carsonella; Candidatus Carsonella ruddii; Candidatus Carsonella ruddii CS isolate Thao2000	0	0	0
Candidatus Carsonella ruddii HC isolate Thao2000	Bacteria; Proteobacteria; Gammaproteobacteria; unclassified Gammaproteobacteria; Candidatus Carsonella; Candidatus Carsonella ruddii; primary endosymbiont of Heteropsylla cubana; Candidatus Carsonella ruddii HC isolate Thao2000	0	0	0	192
Candidatus Carsonella ruddii HT isolate Thao2000	Bacteria; Proteobacteria; Gammaproteobacteria; unclassified Gammaproteobacteria; Candidatus Carsonella; Candidatus Carsonella ruddii; Candidatus Carsonella ruddii HT isolate Thao2000	0	0	0
Candidatus Carsonella ruddii PC isolate NHV	Bacteria; Proteobacteria; Gammaproteobacteria; unclassified Gammaproteobacteria; Candidatus Carsonella; Candidatus Carsonella ruddii; Candidatus Carsonella ruddii PC isolate NHV	0	0	0
Candidatus Carsonella ruddii PV	Bacteria; Proteobacteria; Gammaproteobacteria; unclassified Gammaproteobacteria; Candidatus Carsonella; Candidatus Carsonella ruddii; Candidatus Carsonella ruddii PV	0	0	0	182
Candidatus Chloracidobacterium thermophilum B	Bacteria; Fibrobacteres/Acidobacteria group; Acidobacteria; unclassified Acidobacteria; Candidatus Chloracidobacterium; Candidatus Chloracidobacterium thermophilum; Candidatus Chloracidobacterium thermophilum B	13	83	2	3054
Candidatus Cloacamonas acidaminovorans	Bacteria; unclassified Bacteria; candidate division WWE1; Candidatus Cloacamonas; Candidatus Cloacamonas acidaminovorans	3	28	0	1815
Candidatus Desulforudis audaxviator MP104C	Bacteria; Firmicutes; Clostridia; Clostridiales; Peptococcaceae; Candidatus Desulforudis; Candidatus Desulforudis audaxviator; Candidatus Desulforudis audaxviator MP104C	5	8	0	2157
Candidatus Hamiltonella defensa 5AT (Acyrthosiphon pisum)	Bacteria; Proteobacteria; Gammaproteobacteria; Enterobacteriales; Enterobacteriaceae; unclassified Enterobacteriaceae; ant, tsetse, mealybug, aphid, etc. endosymbionts; aphid secondary symbionts; Candidatus Hamiltonella; Candidatus Hamiltonella defensa; Candidatus Hamiltonella defensa 5AT (Acyrthosiphon pisum)	0	9	0	2148
Candidatus Hodgkinia cicadicola Dsem	Bacteria; Proteobacteria; Alphaproteobacteria; Rhizobiales; unclassified Rhizobiales; Candidatus Hodgkinia; Candidatus Hodgkinia cicadicola; Candidatus Hodgkinia cicadicola Dsem	0	0	0	169
Candidatus Koribacter versatilis Ellin345	Bacteria; Fibrobacteres/Acidobacteria group; Acidobacteria; unclassified Acidobacteria; Candidatus Koribacter; Candidatus Koribacter versatilis; Candidatus Koribacter versatilis Ellin345	2	102	4	4777
Candidatus Liberibacter asiaticus str. psy62	Bacteria; Proteobacteria; Alphaproteobacteria; Rhizobiales; Rhizobiaceae; Candidatus Liberibacter; Candidatus Liberibacter asiaticus; Candidatus Liberibacter asiaticus str. psy62	0	4	0	1109
Candidatus Liberibacter solanacearum CLso-ZC1	Bacteria; Proteobacteria; Alphaproteobacteria; Rhizobiales; Rhizobiaceae; Candidatus Liberibacter; Candidatus Liberibacter solanacearum; Candidatus Liberibacter solanacearum CLso-ZC1	0	5	0	1192
Candidatus Methylomirabilis oxyfera	Bacteria; unclassified Bacteria; candidate division NC10; Candidatus Methylomirabilis; Candidatus Methylomirabilis oxyfera	3	26	8	3072
Candidatus Midichloria mitochondrii IricVA	Bacteria; Proteobacteria; Alphaproteobacteria; Rickettsiales; Rickettsiales genera incertae sedis; Candidatus Midichloria; Candidatus Midichloria mitochondrii; Candidatus Midichloria mitochondrii IricVA	1	4	8	1211
Candidatus Moranella endobia PCIT	Bacteria; Proteobacteria; Gammaproteobacteria; Enterobacteriales; Enterobacteriaceae; Candidatus Moranella; Candidatus Moranella endobia; Candidatus Moranella endobia PCIT	0	1	0	406
Candidatus Nitrospira defluvii	Bacteria; Nitrospirae; Nitrospira; Nitrospirales; Nitrospiraceae; Nitrospira; Candidatus Nitrospira defluvii	18	62	3	4268
Candidatus Pelagibacter sp. IMCC9063	Bacteria; Proteobacteria; Alphaproteobacteria; unclassified Alphaproteobacteria; SAR11 cluster; Candidatus Pelagibacter; Candidatus Pelagibacter sp. IMCC9063	0	4	0	1447
Candidatus Pelagibacter ubique HTCC1062	Bacteria; Proteobacteria; Alphaproteobacteria; unclassified Alphaproteobacteria; SAR11 cluster; Candidatus Pelagibacter; Candidatus Pelagibacter ubique; Candidatus Pelagibacter ubique HTCC1062	0	9	0	1354
Candidatus Phytoplasma australiense	Bacteria; Tenericutes; Mollicutes; Acholeplasmatales; Acholeplasmataceae; Candidatus Phytoplasma; 16SrXII (Stolbur group); Candidatus Phytoplasma australiense	0	0	0	684
Candidatus Phytoplasma mali	Bacteria; Tenericutes; Mollicutes; Acholeplasmatales; Acholeplasmataceae; Candidatus Phytoplasma; 16SrX (Apple proliferation group); Candidatus Phytoplasma mali	0	0	0	479
Candidatus Protochlamydia amoebophila UWE25	Bacteria; Chlamydiae/Verrucomicrobia group; Chlamydiae; Chlamydiia; Chlamydiales; Parachlamydiaceae; Candidatus Protochlamydia; Candidatus Protochlamydia amoebophila; Candidatus Protochlamydia amoebophila UWE25	2	35	6	2031
Candidatus Puniceispirillum marinum IMCC1322	Bacteria; Proteobacteria; Alphaproteobacteria; unclassified Alphaproteobacteria; SAR116 cluster; Candidatus Puniceispirillum; Candidatus Puniceispirillum marinum; Candidatus Puniceispirillum marinum IMCC1322	0	15	0	2543
Candidatus Rickettsia amblyommii str. GAT-30V	Bacteria; Proteobacteria; Alphaproteobacteria; Rickettsiales; Rickettsiaceae; Rickettsieae; Rickettsia; spotted fever group; Candidatus Rickettsia amblyommii; Candidatus Rickettsia amblyommii str. GAT-30V	3	17	9	1390
Candidatus Riesia pediculicola USDA	Bacteria; Proteobacteria; Gammaproteobacteria; Enterobacteriales; Enterobacteriaceae; Candidatus Riesia; Candidatus Riesia pediculicola; Candidatus Riesia pediculicola USDA	0	1	0	556
Candidatus Ruthia magnifica str. Cm (Calyptogena magnifica)	Bacteria; Proteobacteria; Gammaproteobacteria; unclassified Gammaproteobacteria; sulfur-oxidizing symbionts; Candidatus Ruthia magnifica; Candidatus Ruthia magnifica str. Cm (Calyptogena magnifica)	1	4	0	976
Candidatus Solibacter usitatus Ellin6076	Bacteria; Fibrobacteres/Acidobacteria group; Acidobacteria; Solibacteres; Solibacterales; Solibacteraceae; Candidatus Solibacter; Candidatus Solibacter usitatus; Candidatus Solibacter usitatus Ellin6076	26	174	16	7826
Candidatus Sulcia muelleri CARI	Bacteria; Bacteroidetes/Chlorobi group; Bacteroidetes; Flavobacteriia; Flavobacteriales; unclassified Flavobacteriales; Candidatus Sulcia; Candidatus Sulcia muelleri; Candidatus Sulcia muelleri CARI	0	0	0	246
Candidatus Sulcia muelleri DMIN	Bacteria; Bacteroidetes/Chlorobi group; Bacteroidetes; Flavobacteriia; Flavobacteriales; unclassified Flavobacteriales; Candidatus Sulcia; Candidatus Sulcia muelleri; Candidatus Sulcia muelleri DMIN	0	1	0	226
Candidatus Sulcia muelleri GWSS	Bacteria; Bacteroidetes/Chlorobi group; Bacteroidetes; Flavobacteriia; Flavobacteriales; unclassified Flavobacteriales; Candidatus Sulcia; Candidatus Sulcia muelleri; Candidatus Sulcia muelleri GWSS	0	1	0	227
Candidatus Sulcia muelleri SMDSEM	Bacteria; Bacteroidetes/Chlorobi group; Bacteroidetes; Flavobacteriia; Flavobacteriales; unclassified Flavobacteriales; Candidatus Sulcia; Candidatus Sulcia muelleri; Candidatus Sulcia muelleri SMDSEM	0	1	0	242
Candidatus Tremblaya princeps PCIT	Bacteria; Proteobacteria; Betaproteobacteria; unclassified Betaproteobacteria; Candidatus Tremblaya; Candidatus Tremblaya princeps; Candidatus Tremblaya princeps PCIT	0	0	0	121
Candidatus Tremblaya princeps PCVAL	Bacteria; Proteobacteria; Betaproteobacteria; unclassified Betaproteobacteria; Candidatus Tremblaya; Candidatus Tremblaya princeps; Candidatus Tremblaya princeps PCVAL	0	0	0	116
Candidatus Vesicomyosocius okutanii HA	Bacteria; Proteobacteria; Gammaproteobacteria; unclassified Gammaproteobacteria; sulfur-oxidizing symbionts; Calyptogena okutanii thioautotrophic gill symbiont; Candidatus Vesicomyosocius okutanii HA	0	5	0	937
Candidatus Zinderia insecticola CARI	Bacteria; Proteobacteria; Betaproteobacteria; Burkholderiales; Oxalobacteraceae; Candidatus Zinderia; Candidatus Zinderia insecticola; Candidatus Zinderia insecticola CARI	0	0	0	202
Capnocytophaga canimorsus Cc5	Bacteria; Bacteroidetes/Chlorobi group; Bacteroidetes; Flavobacteriia; Flavobacteriales; Flavobacteriaceae; Capnocytophaga; Capnocytophaga canimorsus; Capnocytophaga canimorsus Cc5	5	32	2	2404
Capnocytophaga ochracea DSM 7271	Bacteria; Bacteroidetes/Chlorobi group; Bacteroidetes; Flavobacteriia; Flavobacteriales; Flavobacteriaceae; Capnocytophaga; Capnocytophaga ochracea; Capnocytophaga ochracea DSM 7271	3	36	0	2171
Carboxydothermus hydrogenoformans Z-2901	Bacteria; Firmicutes; Clostridia; Thermoanaerobacterales; Thermoanaerobacteraceae; Carboxydothermus; Carboxydothermus hydrogenoformans; Carboxydothermus hydrogenoformans Z-2901	2	6	0	2620
Carnobacterium sp. 17-4	Bacteria; Firmicutes; Bacilli; Lactobacillales; Carnobacteriaceae; Carnobacterium; Carnobacterium sp. 17-4	4	5	0	2474
Catenulispora acidiphila DSM 44928	Bacteria; Actinobacteria; Actinobacteria; Actinobacteridae; Actinomycetales; Catenulisporineae; Catenulisporaceae; Catenulispora; Catenulispora acidiphila; Catenulispora acidiphila DSM 44928	9	99	1	8913
Caulobacter crescentus CB15	Bacteria; Proteobacteria; Alphaproteobacteria; Caulobacterales; Caulobacteraceae; Caulobacter; Caulobacter vibrioides; Caulobacter crescentus CB15	0	26	1	3737
Caulobacter crescentus NA1000	Bacteria; Proteobacteria; Alphaproteobacteria; Caulobacterales; Caulobacteraceae; Caulobacter; Caulobacter vibrioides; Caulobacter crescentus CB15; Caulobacter crescentus NA1000	0	27	1	3877
Caulobacter segnis ATCC 21756	Bacteria; Proteobacteria; Alphaproteobacteria; Caulobacterales; Caulobacteraceae; Caulobacter; Caulobacter segnis; Caulobacter segnis ATCC 21756	0	31	1	4139
Caulobacter sp. K31	Bacteria; Proteobacteria; Alphaproteobacteria; Caulobacterales; Caulobacteraceae; Caulobacter; Caulobacter sp. K31	3	31	2	5438
Cellulomonas fimi ATCC 484	Bacteria; Actinobacteria; Actinobacteria; Actinobacteridae; Actinomycetales; Micrococcineae; Cellulomonadaceae; Cellulomonas; Cellulomonas fimi; Cellulomonas fimi ATCC 484	3	14	0	3761
Cellulomonas flavigena DSM 20109	Bacteria; Actinobacteria; Actinobacteria; Actinobacteridae; Actinomycetales; Micrococcineae; Cellulomonadaceae; Cellulomonas; Cellulomonas flavigena; Cellulomonas flavigena DSM 20109	0	14	0	3678
Cellulophaga algicola DSM 14237	Bacteria; Bacteroidetes/Chlorobi group; Bacteroidetes; Flavobacteriia; Flavobacteriales; Flavobacteriaceae; Cellulophaga; Cellulophaga algicola; Cellulophaga algicola DSM 14237	3	73	15	4163
Cellulophaga lytica DSM 7489	Bacteria; Bacteroidetes/Chlorobi group; Bacteroidetes; Flavobacteriia; Flavobacteriales; Flavobacteriaceae; Cellulophaga; Cellulophaga lytica; Cellulophaga lytica DSM 7489	0	70	8	3284
Cellvibrio gilvus ATCC 13127	Bacteria; Actinobacteria; Actinobacteria; Actinobacteridae; Actinomycetales; Micrococcineae; Cellulomonadaceae; Cellulomonas; [Cellvibrio] gilvus; [Cellvibrio] gilvus ATCC 13127	0	9	0	3164
Cellvibrio japonicus Ueda107	Bacteria; Proteobacteria; Gammaproteobacteria; Pseudomonadales; Pseudomonadaceae; Cellvibrio; Cellvibrio japonicus; Cellvibrio japonicus Ueda107	4	35	1	3750
Chitinophaga pinensis DSM 2588	Bacteria; Bacteroidetes/Chlorobi group; Bacteroidetes; Sphingobacteriia; Sphingobacteriales; Chitinophagaceae; Chitinophaga; Chitinophaga pinensis; Chitinophaga pinensis DSM 2588	13	202	6	7192
Chlamydia muridarum Nigg	Bacteria; Chlamydiae/Verrucomicrobia group; Chlamydiae; Chlamydiia; Chlamydiales; Chlamydiaceae; Chlamydia/Chlamydophila group; Chlamydia; Chlamydia muridarum; Chlamydia muridarum Nigg	3	10	0	910
Chlamydia trachomatis 434/Bu	Bacteria; Chlamydiae/Verrucomicrobia group; Chlamydiae; Chlamydiia; Chlamydiales; Chlamydiaceae; Chlamydia/Chlamydophila group; Chlamydia; Chlamydia trachomatis; Chlamydia trachomatis 434/Bu	3	9	0	874
Chlamydia trachomatis A/HAR-13	Bacteria; Chlamydiae/Verrucomicrobia group; Chlamydiae; Chlamydiia; Chlamydiales; Chlamydiaceae; Chlamydia/Chlamydophila group; Chlamydia; Chlamydia trachomatis; Chlamydia trachomatis A/HAR-13	3	9	0	919
Chlamydia trachomatis A2497	Bacteria; Chlamydiae/Verrucomicrobia group; Chlamydiae; Chlamydiia; Chlamydiales; Chlamydiaceae; Chlamydia/Chlamydophila group; Chlamydia; Chlamydia trachomatis; Chlamydia trachomatis A2497	3	9	0	879
Chlamydia trachomatis A2497	Bacteria; Chlamydiae/Verrucomicrobia group; Chlamydiae; Chlamydiia; Chlamydiales; Chlamydiaceae; Chlamydia/Chlamydophila group; Chlamydia; Chlamydia trachomatis; Chlamydia trachomatis A2497	3	9	0	989
Chlamydia trachomatis B/Jali20/OT	Bacteria; Chlamydiae/Verrucomicrobia group; Chlamydiae; Chlamydiia; Chlamydiales; Chlamydiaceae; Chlamydia/Chlamydophila group; Chlamydia; Chlamydia trachomatis; Chlamydia trachomatis B/Jali20/OT	3	9	0	875
Chlamydia trachomatis B/TZ1A828/OT	Bacteria; Chlamydiae/Verrucomicrobia group; Chlamydiae; Chlamydiia; Chlamydiales; Chlamydiaceae; Chlamydia/Chlamydophila group; Chlamydia; Chlamydia trachomatis; Chlamydia trachomatis B/TZ1A828/OT	3	9	0	880
Chlamydia trachomatis D-EC	Bacteria; Chlamydiae/Verrucomicrobia group; Chlamydiae; Chlamydiia; Chlamydiales; Chlamydiaceae; Chlamydia/Chlamydophila group; Chlamydia; Chlamydia trachomatis; Chlamydia trachomatis D-EC	3	9	0	878
Chlamydia trachomatis D-LC	Bacteria; Chlamydiae/Verrucomicrobia group; Chlamydiae; Chlamydiia; Chlamydiales; Chlamydiaceae; Chlamydia/Chlamydophila group; Chlamydia; Chlamydia trachomatis; Chlamydia trachomatis D-LC	3	9	0	878
Chlamydia trachomatis D/UW-3/CX	Bacteria; Chlamydiae/Verrucomicrobia group; Chlamydiae; Chlamydiia; Chlamydiales; Chlamydiaceae; Chlamydia/Chlamydophila group; Chlamydia; Chlamydia trachomatis; Chlamydia trachomatis D/UW-3/CX	3	9	0	895
Chlamydia trachomatis E/11023	Bacteria; Chlamydiae/Verrucomicrobia group; Chlamydiae; Chlamydiia; Chlamydiales; Chlamydiaceae; Chlamydia/Chlamydophila group; Chlamydia; Chlamydia trachomatis; Chlamydia trachomatis E/11023	3	9	0	926
Chlamydia trachomatis E/150	Bacteria; Chlamydiae/Verrucomicrobia group; Chlamydiae; Chlamydiia; Chlamydiales; Chlamydiaceae; Chlamydia/Chlamydophila group; Chlamydia; Chlamydia trachomatis; Chlamydia trachomatis E/150	3	9	0	927
Chlamydia trachomatis E/SW3	Bacteria; Chlamydiae/Verrucomicrobia group; Chlamydiae; Chlamydiia; Chlamydiales; Chlamydiaceae; Chlamydia/Chlamydophila group; Chlamydia; Chlamydia trachomatis; Chlamydia trachomatis E/SW3	3	9	0	884
Chlamydia trachomatis F/SW4	Bacteria; Chlamydiae/Verrucomicrobia group; Chlamydiae; Chlamydiia; Chlamydiales; Chlamydiaceae; Chlamydia/Chlamydophila group; Chlamydia; Chlamydia trachomatis; Chlamydia trachomatis F/SW4	3	9	0	881
Chlamydia trachomatis F/SW5	Bacteria; Chlamydiae/Verrucomicrobia group; Chlamydiae; Chlamydiia; Chlamydiales; Chlamydiaceae; Chlamydia/Chlamydophila group; Chlamydia; Chlamydia trachomatis; Chlamydia trachomatis F/SW5	3	9	0	883
Chlamydia trachomatis G/11074	Bacteria; Chlamydiae/Verrucomicrobia group; Chlamydiae; Chlamydiia; Chlamydiales; Chlamydiaceae; Chlamydia/Chlamydophila group; Chlamydia; Chlamydia trachomatis; Chlamydia trachomatis G/11074	3	10	0	919
Chlamydia trachomatis G/11222	Bacteria; Chlamydiae/Verrucomicrobia group; Chlamydiae; Chlamydiia; Chlamydiales; Chlamydiaceae; Chlamydia/Chlamydophila group; Chlamydia; Chlamydia trachomatis; Chlamydia trachomatis G/11222	3	9	0	927
Chlamydia trachomatis G/9301	Bacteria; Chlamydiae/Verrucomicrobia group; Chlamydiae; Chlamydiia; Chlamydiales; Chlamydiaceae; Chlamydia/Chlamydophila group; Chlamydia; Chlamydia trachomatis; Chlamydia trachomatis G/9301	3	10	0	921
Chlamydia trachomatis G/9768	Bacteria; Chlamydiae/Verrucomicrobia group; Chlamydiae; Chlamydiia; Chlamydiales; Chlamydiaceae; Chlamydia/Chlamydophila group; Chlamydia; Chlamydia trachomatis; Chlamydia trachomatis G/9768	3	10	0	920
Chlamydia trachomatis L2b/UCH-1/proctitis	Bacteria; Chlamydiae/Verrucomicrobia group; Chlamydiae; Chlamydiia; Chlamydiales; Chlamydiaceae; Chlamydia/Chlamydophila group; Chlamydia; Chlamydia trachomatis; Chlamydia trachomatis L2b/UCH-1/proctitis	3	9	0	873
Chlamydia trachomatis L2c	Bacteria; Chlamydiae/Verrucomicrobia group; Chlamydiae; Chlamydiia; Chlamydiales; Chlamydiaceae; Chlamydia/Chlamydophila group; Chlamydia; Chlamydia trachomatis; Chlamydia trachomatis L2c	3	9	0	954
Chlamydia trachomatis Sweden2	Bacteria; Chlamydiae/Verrucomicrobia group; Chlamydiae; Chlamydiia; Chlamydiales; Chlamydiaceae; Chlamydia/Chlamydophila group; Chlamydia; Chlamydia trachomatis; Chlamydia trachomatis Sweden2	3	9	0	875
Chlamydophila abortus S26/3	Bacteria; Chlamydiae/Verrucomicrobia group; Chlamydiae; Chlamydiia; Chlamydiales; Chlamydiaceae; Chlamydia/Chlamydophila group; Chlamydophila; Chlamydophila abortus; Chlamydophila abortus S26/3	4	8	0	932
Chlamydophila caviae GPIC	Bacteria; Chlamydiae/Verrucomicrobia group; Chlamydiae; Chlamydiia; Chlamydiales; Chlamydiaceae; Chlamydia/Chlamydophila group; Chlamydophila; Chlamydophila caviae; Chlamydophila caviae GPIC	4	10	0	1005
Chlamydophila felis Fe/C-56	Bacteria; Chlamydiae/Verrucomicrobia group; Chlamydiae; Chlamydiia; Chlamydiales; Chlamydiaceae; Chlamydia/Chlamydophila group; Chlamydophila; Chlamydophila felis; Chlamydophila felis Fe/C-56	4	10	0	1013
Chlamydophila pecorum E58	Bacteria; Chlamydiae/Verrucomicrobia group; Chlamydiae; Chlamydiia; Chlamydiales; Chlamydiaceae; Chlamydia/Chlamydophila group; Chlamydia; Chlamydia pecorum; Chlamydophila pecorum E58	3	12	0	988
Chlamydophila pneumoniae AR39	Bacteria; Chlamydiae/Verrucomicrobia group; Chlamydiae; Chlamydiia; Chlamydiales; Chlamydiaceae; Chlamydia/Chlamydophila group; Chlamydia; Chlamydia pneumoniae; Chlamydophila pneumoniae AR39	3	11	0	1119
Chlamydophila pneumoniae CWL029	Bacteria; Chlamydiae/Verrucomicrobia group; Chlamydiae; Chlamydiia; Chlamydiales; Chlamydiaceae; Chlamydia/Chlamydophila group; Chlamydia; Chlamydia pneumoniae; Chlamydophila pneumoniae CWL029	3	11	0	1052
Chlamydophila pneumoniae J138	Bacteria; Chlamydiae/Verrucomicrobia group; Chlamydiae; Chlamydiia; Chlamydiales; Chlamydiaceae; Chlamydia/Chlamydophila group; Chlamydia; Chlamydia pneumoniae; Chlamydophila pneumoniae J138	3	11	0	1069
Chlamydophila pneumoniae LPCoLN	Bacteria; Chlamydiae/Verrucomicrobia group; Chlamydiae; Chlamydiia; Chlamydiales; Chlamydiaceae; Chlamydia/Chlamydophila group; Chlamydia; Chlamydia pneumoniae; Chlamydophila pneumoniae LPCoLN	3	11	0	1105
Chlamydophila pneumoniae TW-183	Bacteria; Chlamydiae/Verrucomicrobia group; Chlamydiae; Chlamydiia; Chlamydiales; Chlamydiaceae; Chlamydia/Chlamydophila group; Chlamydia; Chlamydia pneumoniae; Chlamydophila pneumoniae TW-183	3	11	0	1113
Chlamydophila psittaci 01DC11	Bacteria; Chlamydiae/Verrucomicrobia group; Chlamydiae; Chlamydiia; Chlamydiales; Chlamydiaceae; Chlamydia/Chlamydophila group; Chlamydia; Chlamydia psittaci; Chlamydophila psittaci 01DC11	4	8	0	1409
Chlamydophila psittaci 02DC15	Bacteria; Chlamydiae/Verrucomicrobia group; Chlamydiae; Chlamydiia; Chlamydiales; Chlamydiaceae; Chlamydia/Chlamydophila group; Chlamydia; Chlamydia psittaci; Chlamydophila psittaci 02DC15	4	8	0	1099
Chlamydophila psittaci 08DC60	Bacteria; Chlamydiae/Verrucomicrobia group; Chlamydiae; Chlamydiia; Chlamydiales; Chlamydiaceae; Chlamydia/Chlamydophila group; Chlamydia; Chlamydia psittaci; Chlamydophila psittaci 08DC60	4	8	0	1260
Chlamydophila psittaci 6BC	Bacteria; Chlamydiae/Verrucomicrobia group; Chlamydiae; Chlamydiia; Chlamydiales; Chlamydiaceae; Chlamydia/Chlamydophila group; Chlamydia; Chlamydia psittaci; Chlamydophila psittaci 6BC	4	8	0	975
Chlamydophila psittaci 6BC	Bacteria; Chlamydiae/Verrucomicrobia group; Chlamydiae; Chlamydiia; Chlamydiales; Chlamydiaceae; Chlamydia/Chlamydophila group; Chlamydia; Chlamydia psittaci; Chlamydophila psittaci 6BC	4	8	0	1009
Chlamydophila psittaci C19/98	Bacteria; Chlamydiae/Verrucomicrobia group; Chlamydiae; Chlamydiia; Chlamydiales; Chlamydiaceae; Chlamydia/Chlamydophila group; Chlamydia; Chlamydia psittaci; Chlamydophila psittaci C19/98	4	8	0	1063
Chlamydophila psittaci RD1	Bacteria; Chlamydiae/Verrucomicrobia group; Chlamydiae; Chlamydiia; Chlamydiales; Chlamydiaceae; Chlamydia/Chlamydophila group; Chlamydia; Chlamydia psittaci; Chlamydophila psittaci RD1	3	8	0	951
Chlorobaculum parvum NCIB 8327	Bacteria; Bacteroidetes/Chlorobi group; Chlorobi; Chlorobia; Chlorobiales; Chlorobiaceae; Chlorobaculum; Chlorobaculum parvum; Chlorobaculum parvum NCIB 8327	1	19	0	2043
Chlorobium chlorochromatii CaD3	Bacteria; Bacteroidetes/Chlorobi group; Chlorobi; Chlorobia; Chlorobiales; Chlorobiaceae; Chlorobium/Pelodictyon group; Chlorobium; Chlorobium chlorochromatii; Chlorobium chlorochromatii CaD3	2	25	1	1999
Chlorobium limicola DSM 245	Bacteria; Bacteroidetes/Chlorobi group; Chlorobi; Chlorobia; Chlorobiales; Chlorobiaceae; Chlorobium/Pelodictyon group; Chlorobium; Chlorobium limicola; Chlorobium limicola DSM 245	1	23	0	2434
Chlorobium luteolum DSM 273	Bacteria; Bacteroidetes/Chlorobi group; Chlorobi; Chlorobia; Chlorobiales; Chlorobiaceae; Chlorobium/Pelodictyon group; Pelodictyon; Pelodictyon luteolum; Chlorobium luteolum DSM 273	0	18	0	2083
Chlorobium phaeobacteroides BS1	Bacteria; Bacteroidetes/Chlorobi group; Chlorobi; Chlorobia; Chlorobiales; Chlorobiaceae; Chlorobium/Pelodictyon group; Chlorobium; Chlorobium phaeobacteroides; Chlorobium phaeobacteroides BS1	1	16	0	2469
Chlorobium phaeobacteroides DSM 266	Bacteria; Bacteroidetes/Chlorobi group; Chlorobi; Chlorobia; Chlorobiales; Chlorobiaceae; Chlorobium/Pelodictyon group; Chlorobium; Chlorobium phaeobacteroides; Chlorobium phaeobacteroides DSM 26	1	28	1	2650
Chlorobium phaeovibrioides DSM 265	Bacteria; Bacteroidetes/Chlorobi group; Chlorobi; Chlorobia; Chlorobiales; Chlorobiaceae; Chlorobium/Pelodictyon group; Chlorobium; Chlorobium phaeovibrioides; Chlorobium phaeovibrioides DSM 265	1	14	0	1753
Chlorobium tepidum TLS	Bacteria; Bacteroidetes/Chlorobi group; Chlorobi; Chlorobia; Chlorobiales; Chlorobiaceae; Chlorobaculum; Chlorobaculum tepidum; Chlorobium tepidum TLS	1	15	0	2245
Chloroflexus aggregans DSM 9485	Bacteria; Chloroflexi; Chloroflexi; Chloroflexales; Chloroflexaceae; Chloroflexus; Chloroflexus aggregans; Chloroflexus aggregans DSM 9485	11	43	0	3731
Chloroflexus aurantiacus J-10-fl	Bacteria; Chloroflexi; Chloroflexi; Chloroflexales; Chloroflexaceae; Chloroflexus; Chloroflexus aurantiacus; Chloroflexus aurantiacus J-10-fl	11	50	0	3853
Chloroflexus sp. Y-400-fl	Bacteria; Chloroflexi; Chloroflexi; Chloroflexales; Chloroflexaceae; Chloroflexus; Chloroflexus sp. Y-400-fl	10	51	0	4159
Chloroherpeton thalassium ATCC 35110	Bacteria; Bacteroidetes/Chlorobi group; Chlorobi; Chlorobia; Chlorobiales; Chlorobiaceae; Chloroherpeton; Chloroherpeton thalassium; Chloroherpeton thalassium ATCC 35110	2	58	0	2710
Chromobacterium violaceum ATCC 12472	Bacteria; Proteobacteria; Betaproteobacteria; Neisseriales; Neisseriaceae; Chromobacterium group; Chromobacterium; Chromobacterium violaceum; Chromobacterium violaceum ATCC 12472	1	25	1	4405
Chromohalobacter salexigens DSM 3043	Bacteria; Proteobacteria; Gammaproteobacteria; Oceanospirillales; Halomonadaceae; Chromohalobacter; Chromohalobacter salexigens; Chromohalobacter salexigens DSM 3043	1	17	1	3298
Citrobacter koseri ATCC BAA-895	Bacteria; Proteobacteria; Gammaproteobacteria; Enterobacteriales; Enterobacteriaceae; Citrobacter; Citrobacter koseri; Citrobacter koseri ATCC BAA-895	1	14	0	5006
Citrobacter rodentium ICC168	Bacteria; Proteobacteria; Gammaproteobacteria; Enterobacteriales; Enterobacteriaceae; Citrobacter; Citrobacter rodentium; Citrobacter rodentium ICC168	1	16	1	4913
Clavibacter michiganensis subsp. michiganensis NCPPB 382	Bacteria; Actinobacteria; Actinobacteria; Actinobacteridae; Actinomycetales; Micrococcineae; Microbacteriaceae; Clavibacter; Clavibacter michiganensis; Clavibacter michiganensis subsp. michiganensis; Clavibacter michiganensis subsp. michiganensis NCPPB 382	5	7	0	3078
Clavibacter michiganensis subsp. sepedonicus	Bacteria; Actinobacteria; Actinobacteria; Actinobacteridae; Actinomycetales; Micrococcineae; Microbacteriaceae; Clavibacter; Clavibacter michiganensis; Clavibacter michiganensis subsp. sepedonicus	4	6	0	3116
Clostridiales genomosp. BVAB3 str. UPII9-5	Bacteria; Firmicutes; Clostridia; Clostridiales; unclassified Clostridiales; unclassified Clostridiales (miscellaneous); Clostridiales genomosp. BVAB3; Clostridiales genomosp. BVAB3 str. UPII9-5	1	3	0	1567
Clostridium acetobutylicum ATCC 824	Bacteria; Firmicutes; Clostridia; Clostridiales; Clostridiaceae; Clostridium; Clostridium acetobutylicum; Clostridium acetobutylicum ATCC 824	3	32	2	3847
Clostridium acetobutylicum DSM 1731	Bacteria; Firmicutes; Clostridia; Clostridiales; Clostridiaceae; Clostridium; Clostridium acetobutylicum; Clostridium acetobutylicum DSM 1731	3	32	2	3922
Clostridium acetobutylicum EA 2018	Bacteria; Firmicutes; Clostridia; Clostridiales; Clostridiaceae; Clostridium; Clostridium acetobutylicum; Clostridium acetobutylicum EA 2018	3	32	2	3916
Clostridium beijerinckii NCIMB 8052	Bacteria; Firmicutes; Clostridia; Clostridiales; Clostridiaceae; Clostridium; Clostridium beijerinckii; Clostridium beijerinckii NCIMB 8052	4	20	2	5020
Clostridium botulinum A str. ATCC 19397	Bacteria; Firmicutes; Clostridia; Clostridiales; Clostridiaceae; Clostridium; Clostridium botulinum; Clostridium botulinum A; Clostridium botulinum A str. ATCC 19397	3	21	0	3550
Clostridium botulinum A str. ATCC 3502	Bacteria; Firmicutes; Clostridia; Clostridiales; Clostridiaceae; Clostridium; Clostridium botulinum; Clostridium botulinum A; Clostridium botulinum A str. ATCC 3502	3	20	0	3590
Clostridium botulinum A str. Hall	Bacteria; Firmicutes; Clostridia; Clostridiales; Clostridiaceae; Clostridium; Clostridium botulinum; Clostridium botulinum A; Clostridium botulinum A str. Hall	3	21	0	3401
Clostridium botulinum A2 str. Kyoto	Bacteria; Firmicutes; Clostridia; Clostridiales; Clostridiaceae; Clostridium; Clostridium botulinum; Clostridium botulinum A; Clostridium botulinum A2 str. Kyoto	4	20	0	3877
Clostridium botulinum A3 str. Loch Maree	Bacteria; Firmicutes; Clostridia; Clostridiales; Clostridiaceae; Clostridium; Clostridium botulinum; Clostridium botulinum A; Clostridium botulinum A3 str. Loch Maree	3	22	0	3983
Clostridium botulinum B str. Eklund 17B	Bacteria; Firmicutes; Clostridia; Clostridiales; Clostridiaceae; Clostridium; Clostridium botulinum; Clostridium botulinum B; Clostridium botulinum B str. Eklund 17B	3	19	1	3475
Clostridium botulinum B1 str. Okra	Bacteria; Firmicutes; Clostridia; Clostridiales; Clostridiaceae; Clostridium; Clostridium botulinum; Clostridium botulinum B; Clostridium botulinum B1; Clostridium botulinum B1 str. Okra	3	21	0	3846
Clostridium botulinum Ba4 str. 657	Bacteria; Firmicutes; Clostridia; Clostridiales; Clostridiaceae; Clostridium; Clostridium botulinum; Clostridium botulinum B; Clostridium botulinum Ba4 str. 657	5	24	0	4002
Clostridium botulinum BKT015925	Bacteria; Firmicutes; Clostridia; Clostridiales; Clostridiaceae; Clostridium; Clostridium botulinum; Clostridium botulinum BKT015925	1	16	0	2994
Clostridium botulinum E3 str. Alaska E43	Bacteria; Firmicutes; Clostridia; Clostridiales; Clostridiaceae; Clostridium; Clostridium botulinum; Clostridium botulinum E; Clostridium botulinum E3 str. Alaska E43	3	17	2	3257
Clostridium botulinum F str. 230613	Bacteria; Firmicutes; Clostridia; Clostridiales; Clostridiaceae; Clostridium; Clostridium botulinum; Clostridium botulinum F; Clostridium botulinum F str. 230613	2	16	0	3527
Clostridium botulinum F str. Langeland	Bacteria; Firmicutes; Clostridia; Clostridiales; Clostridiaceae; Clostridium; Clostridium botulinum; Clostridium botulinum F; Clostridium botulinum F str. Langeland	3	18	0	3655
Clostridium botulinum H04402 065	Bacteria; Firmicutes; Clostridia; Clostridiales; Clostridiaceae; Clostridium; Clostridium botulinum; Clostridium botulinum H04402 065	3	18	0	3691
Clostridium cellulolyticum H10	Bacteria; Firmicutes; Clostridia; Clostridiales; Clostridiaceae; Clostridium; Clostridium cellulolyticum; Clostridium cellulolyticum H10	2	8	2	3390
Clostridium cellulovorans 743B	Bacteria; Firmicutes; Clostridia; Clostridiales; Clostridiaceae; Clostridium; Clostridium cellulovorans; Clostridium cellulovorans 743B	3	26	0	4254
Clostridium clariflavum DSM 19732	Bacteria; Firmicutes; Clostridia; Clostridiales; Clostridiaceae; Clostridium; Clostridium clariflavum; Clostridium clariflavum DSM 19732	7	27	0	3892
Clostridium difficile 630	Bacteria; Firmicutes; Clostridia; Clostridiales; Peptostreptococcaceae; [Clostridium] difficile; Clostridium difficile 630	4	13	0	3798
Clostridium difficile BI1	Bacteria; Firmicutes; Clostridia; Clostridiales; Peptostreptococcaceae; [Clostridium] difficile; Clostridium difficile BI1	5	13	0	3934
Clostridium difficile CD196	Bacteria; Firmicutes; Clostridia; Clostridiales; Peptostreptococcaceae; [Clostridium] difficile; Clostridium difficile CD196	5	14	0	3454
Clostridium difficile R20291	Bacteria; Firmicutes; Clostridia; Clostridiales; Peptostreptococcaceae; [Clostridium] difficile; Clostridium difficile R20291	5	14	0	3506
Clostridium kluyveri DSM 555	Bacteria; Firmicutes; Clostridia; Clostridiales; Clostridiaceae; Clostridium; Clostridium kluyveri; Clostridium kluyveri DSM 555	2	15	0	3913
Clostridium kluyveri NBRC 12016	Bacteria; Firmicutes; Clostridia; Clostridiales; Clostridiaceae; Clostridium; Clostridium kluyveri; Clostridium kluyveri NBRC 12016	2	15	0	3523
Clostridium lentocellum DSM 5427	Bacteria; Firmicutes; Clostridia; Clostridiales; Lachnospiraceae; Cellulosilyticum; Cellulosilyticum lentocellum; Clostridium lentocellum DSM 5427	6	13	0	4182
Clostridium ljungdahlii DSM 13528	Bacteria; Firmicutes; Clostridia; Clostridiales; Clostridiaceae; Clostridium; Clostridium ljungdahlii; Clostridium ljungdahlii DSM 13528	3	23	0	4184
Clostridium novyi NT	Bacteria; Firmicutes; Clostridia; Clostridiales; Clostridiaceae; Clostridium; Clostridium novyi; Clostridium novyi NT	1	17	0	2315
Clostridium perfringens ATCC 13124	Bacteria; Firmicutes; Clostridia; Clostridiales; Clostridiaceae; Clostridium; Clostridium perfringens; Clostridium perfringens ATCC 13124	0	14	0	2876
Clostridium perfringens SM101	Bacteria; Firmicutes; Clostridia; Clostridiales; Clostridiaceae; Clostridium; Clostridium perfringens; Clostridium perfringens SM101	0	15	0	2619
Clostridium perfringens str. 13	Bacteria; Firmicutes; Clostridia; Clostridiales; Clostridiaceae; Clostridium; Clostridium perfringens; Clostridium perfringens str. 13	0	14	0	2723
Clostridium phytofermentans ISDg	Bacteria; Firmicutes; Clostridia; Clostridiales; Clostridiaceae; Clostridium; Clostridium phytofermentans; Clostridium phytofermentans ISDg	2	17	1	3902
Clostridium saccharolyticum WM1	Bacteria; Firmicutes; Clostridia; Clostridiales; Clostridiaceae; Clostridium; Clostridium saccharolyticum; Clostridium saccharolyticum WM1	2	10	0	4154
Clostridium sp. BNL1100	Bacteria; Firmicutes; Clostridia; Clostridiales; Clostridiaceae; Clostridium; Clostridium sp. BNL1100	1	16	1	3920
Clostridium sp. SY8519	Bacteria; Firmicutes; Clostridia; Clostridiales; Clostridiaceae; Clostridium; Clostridium sp. SY8519	1	5	0	2613
Clostridium sticklandii DSM 519	Bacteria; Firmicutes; Clostridia; Clostridiales; Peptostreptococcaceae; [Clostridium] sticklandii; Clostridium sticklandii DSM 519	2	12	0	2573
Clostridium tetani E88	Bacteria; Firmicutes; Clostridia; Clostridiales; Clostridiaceae; Clostridium; Clostridium tetani; Clostridium tetani E88	2	14	0	2439
Clostridium thermocellum ATCC 27405	Bacteria; Firmicutes; Clostridia; Clostridiales; Clostridiaceae; Clostridium; Clostridium thermocellum; Clostridium thermocellum ATCC 27405	3	18	1	3173
Clostridium thermocellum DSM 1313	Bacteria; Firmicutes; Clostridia; Clostridiales; Clostridiaceae; Clostridium; Clostridium thermocellum; Clostridium thermocellum DSM 1313	3	17	0	2911
Collimonas fungivorans Ter331	Bacteria; Proteobacteria; Betaproteobacteria; Burkholderiales; Oxalobacteraceae; Collimonas; Collimonas fungivorans; Collimonas fungivorans Ter331	3	21	2	4432
Colwellia psychrerythraea 34H	Bacteria; Proteobacteria; Gammaproteobacteria; Alteromonadales; Colwelliaceae; Colwellia; Colwellia psychrerythraea; Colwellia psychrerythraea 34H	3	42	0	4910
Comamonas testosteroni CNB-2	Bacteria; Proteobacteria; Betaproteobacteria; Burkholderiales; Comamonadaceae; Comamonas; Comamonas testosteroni; Comamonas testosteroni CNB-1; Comamonas testosteroni CNB-2	2	18	3
Conexibacter woesei DSM 14684	Bacteria; Actinobacteria; Actinobacteria; Rubrobacteridae; Solirubrobacterales; Conexibacteraceae; Conexibacter; Conexibacter woesei; Conexibacter woesei DSM 14684	2	37	1	5914
Coprothermobacter proteolyticus DSM 5265	Bacteria; Firmicutes; Clostridia; Thermoanaerobacterales; Thermodesulfobiaceae; Coprothermobacter; Coprothermobacter proteolyticus; Coprothermobacter proteolyticus DSM 5265	0	5	0	1482
Coraliomargarita akajimensis DSM 45221	Bacteria; Chlamydiae/Verrucomicrobia group; Verrucomicrobia; Opitutae; Puniceicoccales; Puniceicoccaceae; Coraliomargarita; Coraliomargarita akajimensis; Coraliomargarita akajimensis DSM 45221	5	31	4	3120
Corallococcus coralloides DSM 2259	Bacteria; Proteobacteria; delta/epsilon subdivisions; Deltaproteobacteria; Myxococcales; Cystobacterineae; Myxococcaceae; Corallococcus; Corallococcus coralloides; Corallococcus coralloides DSM 2259	50	183	6	8033
Coriobacterium glomerans PW2	Bacteria; Actinobacteria; Actinobacteria; Coriobacteridae; Coriobacteriales; Coriobacterineae; Coriobacteriaceae; Coriobacterium; Coriobacterium glomerans; Coriobacterium glomerans PW2	1	5	0	1768
Corynebacterium aurimucosum ATCC 700975	Bacteria; Actinobacteria; Actinobacteria; Actinobacteridae; Actinomycetales; Corynebacterineae; Corynebacteriaceae; Corynebacterium; Corynebacterium aurimucosum; Corynebacterium aurimucosum ATCC 700975	0	2	1	2551
Corynebacterium diphtheriae 241	Bacteria; Actinobacteria; Actinobacteria; Actinobacteridae; Actinomycetales; Corynebacterineae; Corynebacteriaceae; Corynebacterium; Corynebacterium diphtheriae; Corynebacterium diphtheriae 241	0	2	1	2245
Corynebacterium diphtheriae 31A	Bacteria; Actinobacteria; Actinobacteria; Actinobacteridae; Actinomycetales; Corynebacterineae; Corynebacteriaceae; Corynebacterium; Corynebacterium diphtheriae; Corynebacterium diphtheriae 31A	1	1	0	2381
Corynebacterium diphtheriae BH8	Bacteria; Actinobacteria; Actinobacteria; Actinobacteridae; Actinomycetales; Corynebacterineae; Corynebacteriaceae; Corynebacterium; Corynebacterium diphtheriae; Corynebacterium diphtheriae BH8	0	1	0	2361
Corynebacterium diphtheriae C7 (beta)	Bacteria; Actinobacteria; Actinobacteria; Actinobacteridae; Actinomycetales; Corynebacterineae; Corynebacteriaceae; Corynebacterium; Corynebacterium diphtheriae; Corynebacterium diphtheriae C7 (beta)	0	1	0	2337
Corynebacterium diphtheriae CDCE 8392	Bacteria; Actinobacteria; Actinobacteria; Actinobacteridae; Actinomycetales; Corynebacterineae; Corynebacteriaceae; Corynebacterium; Corynebacterium diphtheriae; Corynebacterium diphtheriae CDCE 8392	0	1	0	2249
Corynebacterium diphtheriae HC01	Bacteria; Actinobacteria; Actinobacteria; Actinobacteridae; Actinomycetales; Corynebacterineae; Corynebacteriaceae; Corynebacterium; Corynebacterium diphtheriae; Corynebacterium diphtheriae HC01	0	2	0	2248
Corynebacterium diphtheriae HC02	Bacteria; Actinobacteria; Actinobacteria; Actinobacteridae; Actinomycetales; Corynebacterineae; Corynebacteriaceae; Corynebacterium; Corynebacterium diphtheriae; Corynebacterium diphtheriae HC02	1	1	0	2230
Corynebacterium diphtheriae HC03	Bacteria; Actinobacteria; Actinobacteria; Actinobacteridae; Actinomycetales; Corynebacterineae; Corynebacteriaceae; Corynebacterium; Corynebacterium diphtheriae; Corynebacterium diphtheriae HC03	0	1	0	2262
Corynebacterium diphtheriae HC04	Bacteria; Actinobacteria; Actinobacteria; Actinobacteridae; Actinomycetales; Corynebacterineae; Corynebacteriaceae; Corynebacterium; Corynebacterium diphtheriae; Corynebacterium diphtheriae HC04	0	2	0	2276
Corynebacterium diphtheriae INCA 402	Bacteria; Actinobacteria; Actinobacteria; Actinobacteridae; Actinomycetales; Corynebacterineae; Corynebacteriaceae; Corynebacterium; Corynebacterium diphtheriae; Corynebacterium diphtheriae INCA 402	0	1	1	2214
Corynebacterium diphtheriae NCTC 13129	Bacteria; Actinobacteria; Actinobacteria; Actinobacteridae; Actinomycetales; Corynebacterineae; Corynebacteriaceae; Corynebacterium; Corynebacterium diphtheriae; Corynebacterium diphtheriae NCTC 13129	0	1	1	2272
Corynebacterium diphtheriae PW8	Bacteria; Actinobacteria; Actinobacteria; Actinobacteridae; Actinomycetales; Corynebacterineae; Corynebacteriaceae; Corynebacterium; Corynebacterium diphtheriae; Corynebacterium diphtheriae PW8	0	1	0	2322
Corynebacterium diphtheriae VA01	Bacteria; Actinobacteria; Actinobacteria; Actinobacteridae; Actinomycetales; Corynebacterineae; Corynebacteriaceae; Corynebacterium; Corynebacterium diphtheriae; Corynebacterium diphtheriae VA01	0	2	0	2191
Corynebacterium efficiens YS-314	Bacteria; Actinobacteria; Actinobacteria; Actinobacteridae; Actinomycetales; Corynebacterineae; Corynebacteriaceae; Corynebacterium; Corynebacterium efficiens; Corynebacterium efficiens YS-314	2	4	3	2994
Corynebacterium glutamicum ATCC 13032	Bacteria; Actinobacteria; Actinobacteria; Actinobacteridae; Actinomycetales; Corynebacterineae; Corynebacteriaceae; Corynebacterium; Corynebacterium glutamicum; Corynebacterium glutamicum ATCC 13032	4	4	4	2993
Corynebacterium glutamicum ATCC 13032	Bacteria; Actinobacteria; Actinobacteria; Actinobacteridae; Actinomycetales; Corynebacterineae; Corynebacteriaceae; Corynebacterium; Corynebacterium glutamicum; Corynebacterium glutamicum ATCC 13032	4	4	4	2992
Corynebacterium glutamicum R	Bacteria; Actinobacteria; Actinobacteria; Actinobacteridae; Actinomycetales; Corynebacterineae; Corynebacteriaceae; Corynebacterium; Corynebacterium glutamicum; Corynebacterium glutamicum R	4	3	4	3080
Corynebacterium jeikeium K411	Bacteria; Actinobacteria; Actinobacteria; Actinobacteridae; Actinomycetales; Corynebacterineae; Corynebacteriaceae; Corynebacterium; Corynebacterium jeikeium; Corynebacterium jeikeium K411	0	2	0	2120
Corynebacterium kroppenstedtii DSM 44385	Bacteria; Actinobacteria; Actinobacteria; Actinobacteridae; Actinomycetales; Corynebacterineae; Corynebacteriaceae; Corynebacterium; Corynebacterium kroppenstedtii; Corynebacterium kroppenstedtii DSM 44385	1	2	0	2018
Corynebacterium pseudotuberculosis 1/06-A	Bacteria; Actinobacteria; Actinobacteria; Actinobacteridae; Actinomycetales; Corynebacterineae; Corynebacteriaceae; Corynebacterium; Corynebacterium pseudotuberculosis; Corynebacterium pseudotuberculosis 1/06-A	0	2	1	1963
Corynebacterium pseudotuberculosis 1002	Bacteria; Actinobacteria; Actinobacteria; Actinobacteridae; Actinomycetales; Corynebacterineae; Corynebacteriaceae; Corynebacterium; Corynebacterium pseudotuberculosis; Corynebacterium pseudotuberculosis 1002	0	2	1	2090
Corynebacterium pseudotuberculosis 258	Bacteria; Actinobacteria; Actinobacteria; Actinobacteridae; Actinomycetales; Corynebacterineae; Corynebacteriaceae; Corynebacterium; Corynebacterium pseudotuberculosis; Corynebacterium pseudotuberculosis 258	0	2	1	2088
Corynebacterium pseudotuberculosis 267	Bacteria; Actinobacteria; Actinobacteria; Actinobacteridae; Actinomycetales; Corynebacterineae; Corynebacteriaceae; Corynebacterium; Corynebacterium pseudotuberculosis; Corynebacterium pseudotuberculosis 267	0	2	1	2148
Corynebacterium pseudotuberculosis 3/99-5	Bacteria; Actinobacteria; Actinobacteria; Actinobacteridae; Actinomycetales; Corynebacterineae; Corynebacteriaceae; Corynebacterium; Corynebacterium pseudotuberculosis; Corynebacterium pseudotuberculosis 3/99-5	0	2	1	2142
Corynebacterium pseudotuberculosis 31	Bacteria; Actinobacteria; Actinobacteria; Actinobacteridae; Actinomycetales; Corynebacterineae; Corynebacteriaceae; Corynebacterium; Corynebacterium pseudotuberculosis; Corynebacterium pseudotuberculosis 31	0	2	1	2063
Corynebacterium pseudotuberculosis 316	Bacteria; Actinobacteria; Actinobacteria; Actinobacteridae; Actinomycetales; Corynebacterineae; Corynebacteriaceae; Corynebacterium; Corynebacterium pseudotuberculosis; Corynebacterium pseudotuberculosis 316	0	2	1	2106
Corynebacterium pseudotuberculosis 42/02-A	Bacteria; Actinobacteria; Actinobacteria; Actinobacteridae; Actinomycetales; Corynebacterineae; Corynebacteriaceae; Corynebacterium; Corynebacterium pseudotuberculosis; Corynebacterium pseudotuberculosis 42/02-A	0	2	1	2051
Corynebacterium pseudotuberculosis C231	Bacteria; Actinobacteria; Actinobacteria; Actinobacteridae; Actinomycetales; Corynebacterineae; Corynebacteriaceae; Corynebacterium; Corynebacterium pseudotuberculosis; Corynebacterium pseudotuberculosis C231	0	2	1	2091
Corynebacterium pseudotuberculosis CIP 52.97	Bacteria; Actinobacteria; Actinobacteria; Actinobacteridae; Actinomycetales; Corynebacterineae; Corynebacteriaceae; Corynebacterium; Corynebacterium pseudotuberculosis; Corynebacterium pseudotuberculosis CIP 52.97	0	2	1	2060
Corynebacterium pseudotuberculosis Cp162	Bacteria; Actinobacteria; Actinobacteria; Actinobacteridae; Actinomycetales; Corynebacterineae; Corynebacteriaceae; Corynebacterium; Corynebacterium pseudotuberculosis; Corynebacterium pseudotuberculosis Cp162	0	1	1	2002
Corynebacterium pseudotuberculosis FRC41	Bacteria; Actinobacteria; Actinobacteria; Actinobacteridae; Actinomycetales; Corynebacterineae; Corynebacteriaceae; Corynebacterium; Corynebacterium pseudotuberculosis; Corynebacterium pseudotuberculosis FRC41	0	2	1	2110
Corynebacterium pseudotuberculosis I19	Bacteria; Actinobacteria; Actinobacteria; Actinobacteridae; Actinomycetales; Corynebacterineae; Corynebacteriaceae; Corynebacterium; Corynebacterium pseudotuberculosis; Corynebacterium pseudotuberculosis I19	0	2	1	2095
Corynebacterium pseudotuberculosis P54B96	Bacteria; Actinobacteria; Actinobacteria; Actinobacteridae; Actinomycetales; Corynebacterineae; Corynebacteriaceae; Corynebacterium; Corynebacterium pseudotuberculosis; Corynebacterium pseudotuberculosis P54B96	0	2	1	2084
Corynebacterium pseudotuberculosis PAT10	Bacteria; Actinobacteria; Actinobacteria; Actinobacteridae; Actinomycetales; Corynebacterineae; Corynebacteriaceae; Corynebacterium; Corynebacterium pseudotuberculosis; Corynebacterium pseudotuberculosis PAT10	0	2	1	2079
Corynebacterium resistens DSM 45100	Bacteria; Actinobacteria; Actinobacteria; Actinobacteridae; Actinomycetales; Corynebacterineae; Corynebacteriaceae; Corynebacterium; Corynebacterium resistens; Corynebacterium resistens DSM 45100	2	3	0	2171
Corynebacterium ulcerans 0102	Bacteria; Actinobacteria; Actinobacteria; Actinobacteridae; Actinomycetales; Corynebacterineae; Corynebacteriaceae; Corynebacterium; Corynebacterium ulcerans; Corynebacterium ulcerans 0102	0	2	1	2349
Corynebacterium ulcerans 809	Bacteria; Actinobacteria; Actinobacteria; Actinobacteridae; Actinomycetales; Corynebacterineae; Corynebacteriaceae; Corynebacterium; Corynebacterium ulcerans; Corynebacterium ulcerans 809	0	2	1	2180
Corynebacterium ulcerans BR-AD22	Bacteria; Actinobacteria; Actinobacteria; Actinobacteridae; Actinomycetales; Corynebacterineae; Corynebacteriaceae; Corynebacterium; Corynebacterium ulcerans; Corynebacterium ulcerans BR-AD22	1	2	1	2334
Corynebacterium urealyticum DSM 7109	Bacteria; Actinobacteria; Actinobacteria; Actinobacteridae; Actinomycetales; Corynebacterineae; Corynebacteriaceae; Corynebacterium; Corynebacterium urealyticum; Corynebacterium urealyticum DSM 7109	0	1	0	2022
Corynebacterium variabile DSM 44702	Bacteria; Actinobacteria; Actinobacteria; Actinobacteridae; Actinomycetales; Corynebacterineae; Corynebacteriaceae; Corynebacterium; Corynebacterium variabile; Corynebacterium variabile DSM 44702	1	2	0	3039
Coxiella burnetii CbuG_Q212	Bacteria; Proteobacteria; Gammaproteobacteria; Legionellales; Coxiellaceae; Coxiella; Coxiella burnetii; Coxiella burnetii CbuG_Q212	3	7	9	1866
Coxiella burnetii CbuK_Q154	Bacteria; Proteobacteria; Gammaproteobacteria; Legionellales; Coxiellaceae; Coxiella; Coxiella burnetii; Coxiella burnetii CbuK_Q154	1	7	10	1942
Coxiella burnetii Dugway 5J108-111	Bacteria; Proteobacteria; Gammaproteobacteria; Legionellales; Coxiellaceae; Coxiella; Coxiella burnetii; Coxiella burnetii Dugway 5J108-111	5	9	16	2045
Coxiella burnetii RSA 331	Bacteria; Proteobacteria; Gammaproteobacteria; Legionellales; Coxiellaceae; Coxiella; Coxiella burnetii; Coxiella burnetii RSA 331	3	7	13	1975
Coxiella burnetii RSA 493	Bacteria; Proteobacteria; Gammaproteobacteria; Legionellales; Coxiellaceae; Coxiella; Coxiella burnetii; Coxiella burnetii RSA 493	2	7	8	1847
Croceibacter atlanticus HTCC2559	Bacteria; Bacteroidetes/Chlorobi group; Bacteroidetes; Flavobacteriia; Flavobacteriales; Flavobacteriaceae; Croceibacter; Croceibacter atlanticus; Croceibacter atlanticus HTCC2559	1	32	1	2702
Cronobacter sakazakii ATCC BAA-894	Bacteria; Proteobacteria; Gammaproteobacteria; Enterobacteriales; Enterobacteriaceae; Cronobacter; Cronobacter sakazakii; Cronobacter sakazakii ATCC BAA-894	3	15	2	4422
Cronobacter sakazakii ES15	Bacteria; Proteobacteria; Gammaproteobacteria; Enterobacteriales; Enterobacteriaceae; Cronobacter; Cronobacter sakazakii; Cronobacter sakazakii ES15	2	15	1	3916
Cronobacter turicensis z3032	Bacteria; Proteobacteria; Gammaproteobacteria; Enterobacteriales; Enterobacteriaceae; Cronobacter; Cronobacter turicensis; Cronobacter turicensis z3032	1	15	2	4452
Cryptobacterium curtum DSM 15641	Bacteria; Actinobacteria; Actinobacteria; Coriobacteridae; Coriobacteriales; Coriobacterineae; Coriobacteriaceae; Cryptobacterium; Cryptobacterium curtum; Cryptobacterium curtum DSM 15641	1	2	0	1357
Cupriavidus metallidurans CH34	Bacteria; Proteobacteria; Betaproteobacteria; Burkholderiales; Burkholderiaceae; Cupriavidus; Cupriavidus metallidurans; Cupriavidus metallidurans CH34	0	25	3	6477
Cupriavidus necator N-1	Bacteria; Proteobacteria; Betaproteobacteria; Burkholderiales; Burkholderiaceae; Cupriavidus; Cupriavidus necator; Cupriavidus necator N-1	2	42	5	7832
Cupriavidus taiwanensis LMG 19424	Bacteria; Proteobacteria; Betaproteobacteria; Burkholderiales; Burkholderiaceae; Cupriavidus; Cupriavidus taiwanensis; Cupriavidus taiwanensis LMG 19424	2	23	3	5896
cyanobacterium UCYN-A	Bacteria; Cyanobacteria; Chroococcales; unclassified Chroococcales; cyanobacterium UCYN-A	1	14	0
Cyanothece sp. ATCC 51142	Bacteria; Cyanobacteria; Chroococcales; Cyanothece; Cyanothece sp. ATCC 51142	11	50	3	5304
Cyanothece sp. PCC 7424	Bacteria; Cyanobacteria; Chroococcales; Cyanothece; Cyanothece sp. PCC 7424	20	76	2	5710
Cyanothece sp. PCC 7425	Bacteria; Cyanobacteria; Chroococcales; Cyanothece; Cyanothece sp. PCC 7425	17	53	2	5327
Cyanothece sp. PCC 7822	Bacteria; Cyanobacteria; Chroococcales; Cyanothece; Cyanothece sp. PCC 7822	22	97	1	6642
Cyanothece sp. PCC 8801	Bacteria; Cyanobacteria; Chroococcales; Cyanothece; Cyanothece sp. PCC 8801	16	58	0	4367
Cyanothece sp. PCC 8802	Bacteria; Cyanobacteria; Chroococcales; Cyanothece; Cyanothece sp. PCC 8802	12	59	0	4444
Cyclobacterium marinum DSM 745	Bacteria; Bacteroidetes/Chlorobi group; Bacteroidetes; Cytophagia; Cytophagales; Cyclobacteriaceae; Cyclobacterium; Cyclobacterium marinum; Cyclobacterium marinum DSM 745	25	109	0	5000
Cytophaga hutchinsonii ATCC 33406	Bacteria; Bacteroidetes/Chlorobi group; Bacteroidetes; Cytophagia; Cytophagales; Cytophagaceae; Cytophaga; Cytophaga hutchinsonii; Cytophaga hutchinsonii ATCC 33406	6	53	0	3785
Dechloromonas aromatica RCB	Bacteria; Proteobacteria; Betaproteobacteria; Rhodocyclales; Rhodocyclaceae; Dechloromonas; Dechloromonas aromatica; Dechloromonas aromatica RCB	3	28	6	4171
Dechlorosoma suillum PS	Bacteria; Proteobacteria; Betaproteobacteria; Rhodocyclales; Rhodocyclaceae; Azospira; Azospira oryzae; Dechlorosoma suillum PS	0	26	4	3443
Deferribacter desulfuricans SSM1	Bacteria; Deferribacteres; Deferribacteres; Deferribacterales; Deferribacteraceae; Deferribacter; Deferribacter desulfuricans; Deferribacter desulfuricans SSM1	2	25	5	2374
Dehalococcoides ethenogenes 195	Bacteria; Chloroflexi; Dehalococcoidetes; Dehalococcoidales; Dehalococcoidaceae; Dehalococcoides; Dehalococcoides mccartyi; Dehalococcoides ethenogenes 195	4	1	0	1580
Dehalococcoides sp. BAV1	Bacteria; Chloroflexi; Dehalococcoidetes; Dehalococcoidales; Dehalococcoidaceae; Dehalococcoides; Dehalococcoides mccartyi; Dehalococcoides sp. BAV1	3	1	0	1371
Dehalococcoides sp. CBDB1	Bacteria; Chloroflexi; Dehalococcoidetes; Dehalococcoidales; Dehalococcoidaceae; Dehalococcoides; Dehalococcoides mccartyi; Dehalococcoides sp. CBDB1	3	1	0	1458
Dehalococcoides sp. GT	Bacteria; Chloroflexi; Dehalococcoidetes; Dehalococcoidales; Dehalococcoidaceae; Dehalococcoides; Dehalococcoides mccartyi; Dehalococcoides sp. GT	3	1	0	1417
Dehalococcoides sp. VS	Bacteria; Chloroflexi; Dehalococcoidetes; Dehalococcoidales; Dehalococcoidaceae; Dehalococcoides; Dehalococcoides mccartyi; Dehalococcoides sp. VS	3	2	0	1439
Dehalogenimonas lykanthroporepellens BL-DC-9	Bacteria; Chloroflexi; Dehalococcoidetes; Dehalogenimonas; Dehalogenimonas lykanthroporepellens; Dehalogenimonas lykanthroporepellens BL-DC-9	2	2	0	1659
Deinococcus deserti VCD115	Bacteria; Deinococcus-Thermus; Deinococci; Deinococcales; Deinococcaceae; Deinococcus; Deinococcus deserti; Deinococcus deserti VCD115	3	32	3	3459
Deinococcus geothermalis DSM 11300	Bacteria; Deinococcus-Thermus; Deinococci; Deinococcales; Deinococcaceae; Deinococcus; Deinococcus geothermalis; Deinococcus geothermalis DSM 11300	2	22	1	3054
Deinococcus gobiensis I-0	Bacteria; Deinococcus-Thermus; Deinococci; Deinococcales; Deinococcaceae; Deinococcus; Deinococcus gobiensis; Deinococcus gobiensis I-0	3	30	5	4340
Deinococcus maricopensis DSM 21211	Bacteria; Deinococcus-Thermus; Deinococci; Deinococcales; Deinococcaceae; Deinococcus; Deinococcus maricopensis; Deinococcus maricopensis DSM 21211	2	32	2	3264
Deinococcus proteolyticus MRP	Bacteria; Deinococcus-Thermus; Deinococci; Deinococcales; Deinococcaceae; Deinococcus; Deinococcus proteolyticus; Deinococcus proteolyticus MRP	1	20	2	2656
Deinococcus radiodurans R1	Bacteria; Deinococcus-Thermus; Deinococci; Deinococcales; Deinococcaceae; Deinococcus; Deinococcus radiodurans; Deinococcus radiodurans R1	3	21	3	3167
Delftia acidovorans SPH-1	Bacteria; Proteobacteria; Betaproteobacteria; Burkholderiales; Comamonadaceae; Delftia; Delftia acidovorans; Delftia acidovorans SPH-1	1	29	3	6040
Delftia sp. Cs1-4	Bacteria; Proteobacteria; Betaproteobacteria; Burkholderiales; Comamonadaceae; Delftia; Delftia sp. Cs1-4	2	33	3	5861
Denitrovibrio acetiphilus DSM 12809	Bacteria; Deferribacteres; Deferribacteres; Deferribacterales; Deferribacteraceae; Denitrovibrio; Denitrovibrio acetiphilus; Denitrovibrio acetiphilus DSM 12809	4	26	1	2964
Desulfarculus baarsii DSM 2075	Bacteria; Proteobacteria; delta/epsilon subdivisions; Deltaproteobacteria; Desulfarculales; Desulfarculaceae; Desulfarculus; Desulfarculus baarsii; Desulfarculus baarsii DSM 2075	4	48	0	3277
Desulfatibacillum alkenivorans AK-01	Bacteria; Proteobacteria; delta/epsilon subdivisions; Deltaproteobacteria; Desulfobacterales; Desulfobacteraceae; Desulfatibacillum; Desulfatibacillum alkenivorans; Desulfatibacillum alkenivorans AK-01	12	99	4	5252
Desulfitobacterium dehalogenans ATCC 51507	Bacteria; Firmicutes; Clostridia; Clostridiales; Peptococcaceae; Desulfitobacterium; Desulfitobacterium dehalogenans; Desulfitobacterium dehalogenans ATCC 51507	4	9	0	4011
Desulfitobacterium hafniense DCB-2	Bacteria; Firmicutes; Clostridia; Clostridiales; Peptococcaceae; Desulfitobacterium; Desulfitobacterium hafniense; Desulfitobacterium hafniense DCB-2	3	15	0	4883
Desulfitobacterium hafniense Y51	Bacteria; Firmicutes; Clostridia; Clostridiales; Peptococcaceae; Desulfitobacterium; Desulfitobacterium hafniense; Desulfitobacterium hafniense Y51	2	19	0	5060
Desulfobacca acetoxidans DSM 11109	Bacteria; Proteobacteria; delta/epsilon subdivisions; Deltaproteobacteria; Syntrophobacterales; Syntrophaceae; Desulfobacca; Desulfobacca acetoxidans; Desulfobacca acetoxidans DSM 11109	2	32	0	2866
Desulfobacterium autotrophicum HRM2	Bacteria; Proteobacteria; delta/epsilon subdivisions; Deltaproteobacteria; Desulfobacterales; Desulfobacteraceae; Desulfobacterium; Desulfobacterium autotrophicum; Desulfobacterium autotrophicum HRM2	7	46	2	4943
Desulfobulbus propionicus DSM 2032	Bacteria; Proteobacteria; delta/epsilon subdivisions; Deltaproteobacteria; Desulfobacterales; Desulfobulbaceae; Desulfobulbus; Desulfobulbus propionicus; Desulfobulbus propionicus DSM 2032	5	27	0	3283
Desulfococcus oleovorans Hxd3	Bacteria; Proteobacteria; delta/epsilon subdivisions; Deltaproteobacteria; Desulfobacterales; Desulfobacteraceae; Desulfococcus; Desulfococcus oleovorans; Desulfococcus oleovorans Hxd3	7	57	5	3265
Desulfohalobium retbaense DSM 5692	Bacteria; Proteobacteria; delta/epsilon subdivisions; Deltaproteobacteria; Desulfovibrionales; Desulfohalobiaceae; Desulfohalobium; Desulfohalobium retbaense; Desulfohalobium retbaense DSM 5692	0	30	4	2526
Desulfomicrobium baculatum DSM 4028	Bacteria; Proteobacteria; delta/epsilon subdivisions; Deltaproteobacteria; Desulfovibrionales; Desulfomicrobiaceae; Desulfomicrobium; Desulfomicrobium baculatum; Desulfomicrobium baculatum DSM 4028	4	35	0	3436
Desulfomonile tiedjei DSM 6799	Bacteria; Proteobacteria; delta/epsilon subdivisions; Deltaproteobacteria; Syntrophobacterales; Syntrophaceae; Desulfomonile; Desulfomonile tiedjei; Desulfomonile tiedjei DSM 6799	10	62	42	5494
Desulfosporosinus acidiphilus SJ4	Bacteria; Firmicutes; Clostridia; Clostridiales; Peptococcaceae; Desulfosporosinus; Desulfosporosinus acidiphilus; Desulfosporosinus acidiphilus SJ4	5	18	0	4505
Desulfosporosinus orientis DSM 765	Bacteria; Firmicutes; Clostridia; Clostridiales; Peptococcaceae; Desulfosporosinus; Desulfosporosinus orientis; Desulfosporosinus orientis DSM 765	4	19	0	5242
Desulfotalea psychrophila LSv54	Bacteria; Proteobacteria; delta/epsilon subdivisions; Deltaproteobacteria; Desulfobacterales; Desulfobulbaceae; Desulfotalea; Desulfotalea psychrophila; Desulfotalea psychrophila LSv54	6	27	0	3234
Desulfotomaculum acetoxidans DSM 771	Bacteria; Firmicutes; Clostridia; Clostridiales; Peptococcaceae; Desulfotomaculum; Desulfotomaculum acetoxidans; Desulfotomaculum acetoxidans DSM 771	3	11	0	4068
Desulfotomaculum carboxydivorans CO-1-SRB	Bacteria; Firmicutes; Clostridia; Clostridiales; Peptococcaceae; Desulfotomaculum; Desulfotomaculum carboxydivorans; Desulfotomaculum carboxydivorans CO-1-SRB	2	10	1	2657
Desulfotomaculum kuznetsovii DSM 6115	Bacteria; Firmicutes; Clostridia; Clostridiales; Peptococcaceae; Desulfotomaculum; Desulfotomaculum kuznetsovii; Desulfotomaculum kuznetsovii DSM 6115	5	13	0	3398
Desulfotomaculum reducens MI-1	Bacteria; Firmicutes; Clostridia; Clostridiales; Peptococcaceae; Desulfotomaculum; Desulfotomaculum reducens; Desulfotomaculum reducens MI-1	2	14	0	3276
Desulfotomaculum ruminis DSM 2154	Bacteria; Firmicutes; Clostridia; Clostridiales; Peptococcaceae; Desulfotomaculum; Desulfotomaculum ruminis; Desulfotomaculum ruminis DSM 2154	4	9	1	3796
Desulfovibrio aespoeensis Aspo-2	Bacteria; Proteobacteria; delta/epsilon subdivisions; Deltaproteobacteria; Desulfovibrionales; Desulfovibrionaceae; Desulfovibrio; Desulfovibrio aespoeensis; Desulfovibrio aespoeensis Aspo-2	4	52	1	3304
Desulfovibrio africanus str. Walvis Bay	Bacteria; Proteobacteria; delta/epsilon subdivisions; Deltaproteobacteria; Desulfovibrionales; Desulfovibrionaceae; Desulfovibrio; Desulfovibrio africanus; Desulfovibrio africanus str. Walvis Bay	4	47	0	3725
Desulfovibrio alaskensis G20	Bacteria; Proteobacteria; delta/epsilon subdivisions; Deltaproteobacteria; Desulfovibrionales; Desulfovibrionaceae; Desulfovibrio; Desulfovibrio alaskensis; Desulfovibrio alaskensis G20	2	37	0	3258
Desulfovibrio desulfuricans ND132	Bacteria; Proteobacteria; delta/epsilon subdivisions; Deltaproteobacteria; Desulfovibrionales; Desulfovibrionaceae; Desulfovibrio; Desulfovibrio desulfuricans; Desulfovibrio desulfuricans ND132	6	48	2	3454
Desulfovibrio desulfuricans subsp. desulfuricans str. ATCC 27774	Bacteria; Proteobacteria; delta/epsilon subdivisions; Deltaproteobacteria; Desulfovibrionales; Desulfovibrionaceae; Desulfovibrio; Desulfovibrio desulfuricans; Desulfovibrio desulfuricans subsp. desulfuricans; Desulfovibrio desulfuricans subsp. desulfuricans str. ATCC 27774	3	26	0	2356
Desulfovibrio magneticus RS-1	Bacteria; Proteobacteria; delta/epsilon subdivisions; Deltaproteobacteria; Desulfovibrionales; Desulfovibrionaceae; Desulfovibrio; Desulfovibrio magneticus; Desulfovibrio magneticus RS-1	4	63	0	4700
Desulfovibrio salexigens DSM 2638	Bacteria; Proteobacteria; delta/epsilon subdivisions; Deltaproteobacteria; Desulfovibrionales; Desulfovibrionaceae; Desulfovibrio; Desulfovibrio salexigens; Desulfovibrio salexigens DSM 2638	5	61	0	3807
Desulfovibrio vulgaris RCH1	Bacteria; Proteobacteria; delta/epsilon subdivisions; Deltaproteobacteria; Desulfovibrionales; Desulfovibrionaceae; Desulfovibrio; Desulfovibrio vulgaris; Desulfovibrio vulgaris RCH1	2	38	0	3221
Desulfovibrio vulgaris str. 'Miyazaki F'	Bacteria; Proteobacteria; delta/epsilon subdivisions; Deltaproteobacteria; Desulfovibrionales; Desulfovibrionaceae; Desulfovibrio; Desulfovibrio vulgaris; Desulfovibrio vulgaris str. 'Miyazaki F'	2	39	0	3180
Desulfovibrio vulgaris str. Hildenborough	Bacteria; Proteobacteria; delta/epsilon subdivisions; Deltaproteobacteria; Desulfovibrionales; Desulfovibrionaceae; Desulfovibrio; Desulfovibrio vulgaris; Desulfovibrio vulgaris str. Hildenborough	2	37	0	3536
Desulfovibrio vulgaris subsp. vulgaris DP4	Bacteria; Proteobacteria; delta/epsilon subdivisions; Deltaproteobacteria; Desulfovibrionales; Desulfovibrionaceae; Desulfovibrio; Desulfovibrio vulgaris; Desulfovibrio vulgaris DP4	2	37	0	3091
Desulfurispirillum indicum S5	Bacteria; Chrysiogenetes; Chrysiogenetes; Chrysiogenales; Chrysiogenaceae; Desulfurispirillum; Desulfurispirillum indicum; Desulfurispirillum indicum S5	1	27	0	2571
Desulfurivibrio alkaliphilus AHT2	Bacteria; Proteobacteria; delta/epsilon subdivisions; Deltaproteobacteria; Desulfobacterales; Desulfobulbaceae; Desulfurivibrio; Desulfurivibrio alkaliphilus; Desulfurivibrio alkaliphilus AHT2	2	27	0	2620
Desulfurobacterium thermolithotrophum DSM 11699	Bacteria; Aquificae; Aquificae; Aquificales; Desulfurobacteriaceae; Desulfurobacterium; Desulfurobacterium thermolithotrophum; Desulfurobacterium thermolithotrophum DSM 11699	1	14	1	1509
Dichelobacter nodosus VCS1703A	Bacteria; Proteobacteria; Gammaproteobacteria; Cardiobacteriales; Cardiobacteriaceae; Dichelobacter; Dichelobacter nodosus; Dichelobacter nodosus VCS1703A	0	12	2	1280
Dickeya dadantii 3937	Bacteria; Proteobacteria; Gammaproteobacteria; Enterobacteriales; Enterobacteriaceae; Dickeya; Dickeya dadantii; Dickeya dadantii 3937	1	14	3	4549
Dickeya dadantii Ech586	Bacteria; Proteobacteria; Gammaproteobacteria; Enterobacteriales; Enterobacteriaceae; Dickeya; Dickeya dadantii; Dickeya dadantii Ech586	0	12	3	4144
Dickeya dadantii Ech703	Bacteria; Proteobacteria; Gammaproteobacteria; Enterobacteriales; Enterobacteriaceae; Dickeya; Dickeya dadantii; Dickeya dadantii Ech703	0	11	0	3970
Dickeya zeae Ech1591	Bacteria; Proteobacteria; Gammaproteobacteria; Enterobacteriales; Enterobacteriaceae; Dickeya; Dickeya zeae; Dickeya zeae Ech1591	1	15	5	4163
Dictyoglomus thermophilum H-6-12	Bacteria; Dictyoglomi; Dictyoglomia; Dictyoglomales; Dictyoglomaceae; Dictyoglomus; Dictyoglomus thermophilum; Dictyoglomus thermophilum H-6-12	0	11	0	1912
Dictyoglomus turgidum DSM 6724	Bacteria; Dictyoglomi; Dictyoglomia; Dictyoglomales; Dictyoglomaceae; Dictyoglomus; Dictyoglomus turgidum; Dictyoglomus turgidum DSM 6724	1	9	0	1744
Dinoroseobacter shibae DFL 12	Bacteria; Proteobacteria; Alphaproteobacteria; Rhodobacterales; Rhodobacteraceae; Dinoroseobacter; Dinoroseobacter shibae; Dinoroseobacter shibae DFL 12	1	25	0	4192
Dyadobacter fermentans DSM 18053	Bacteria; Bacteroidetes/Chlorobi group; Bacteroidetes; Cytophagia; Cytophagales; Cytophagaceae; Dyadobacter; Dyadobacter fermentans; Dyadobacter fermentans DSM 18053	22	142	6	5719
Edwardsiella ictaluri 93-146	Bacteria; Proteobacteria; Gammaproteobacteria; Enterobacteriales; Enterobacteriaceae; Edwardsiella; Edwardsiella ictaluri; Edwardsiella ictaluri 93-146	0	15	0	3735
Edwardsiella tarda EIB202	Bacteria; Proteobacteria; Gammaproteobacteria; Enterobacteriales; Enterobacteriaceae; Edwardsiella; Edwardsiella tarda; Edwardsiella tarda EIB202	0	17	1	3591
Edwardsiella tarda FL6-60	Bacteria; Proteobacteria; Gammaproteobacteria; Enterobacteriales; Enterobacteriaceae; Edwardsiella; Edwardsiella tarda; Edwardsiella tarda FL6-60	0	17	0	3256
Eggerthella lenta DSM 2243	Bacteria; Actinobacteria; Actinobacteria; Coriobacteridae; Coriobacteriales; Coriobacterineae; Coriobacteriaceae; Eggerthella; Eggerthella lenta; Eggerthella lenta DSM 2243	1	5	0	3070
Eggerthella sp. YY7918	Bacteria; Actinobacteria; Actinobacteria; Coriobacteridae; Coriobacteriales; Coriobacterineae; Coriobacteriaceae; Eggerthella; Eggerthella sp. YY7918	2	4	0	2680
Ehrlichia canis str. Jake	Bacteria; Proteobacteria; Alphaproteobacteria; Rickettsiales; Anaplasmataceae; Ehrlichia; canis group; Ehrlichia canis; Ehrlichia canis str. Jake	0	4	5	925
Ehrlichia chaffeensis str. Arkansas	Bacteria; Proteobacteria; Alphaproteobacteria; Rickettsiales; Anaplasmataceae; Ehrlichia; canis group; Ehrlichia chaffeensis; Ehrlichia chaffeensis str. Arkansas	0	4	5	1105
Ehrlichia ruminantium str. Gardel	Bacteria; Proteobacteria; Alphaproteobacteria; Rickettsiales; Anaplasmataceae; Ehrlichia; canis group; Ehrlichia ruminantium; Ehrlichia ruminantium str. Gardel	1	4	5	950
Ehrlichia ruminantium str. Welgevonden	Bacteria; Proteobacteria; Alphaproteobacteria; Rickettsiales; Anaplasmataceae; Ehrlichia; canis group; Ehrlichia ruminantium; Ehrlichia ruminantium str. Welgevonden	1	4	4	888
Ehrlichia ruminantium str. Welgevonden	Bacteria; Proteobacteria; Alphaproteobacteria; Rickettsiales; Anaplasmataceae; Ehrlichia; canis group; Ehrlichia ruminantium; Ehrlichia ruminantium str. Welgevonden	1	4	4	958
Elusimicrobium minutum Pei191	Bacteria; Elusimicrobia; Elusimicrobia; Elusimicrobiales; Elusimicrobiaceae; Elusimicrobium; Elusimicrobium minutum; Elusimicrobium minutum Pei191	3	23	5	1529
Enterobacter aerogenes KCTC 2190	Bacteria; Proteobacteria; Gammaproteobacteria; Enterobacteriales; Enterobacteriaceae; Enterobacter; Enterobacter aerogenes; Enterobacter aerogenes KCTC 2190	0	16	1	4912
Enterobacter asburiae LF7a	Bacteria; Proteobacteria; Gammaproteobacteria; Enterobacteriales; Enterobacteriaceae; Enterobacter; Enterobacter cloacae complex; Enterobacter asburiae; Enterobacter asburiae LF7a	2	13	1	4612
Enterobacter cloacae EcWSU1	Bacteria; Proteobacteria; Gammaproteobacteria; Enterobacteriales; Enterobacteriaceae; Enterobacter; Enterobacter cloacae complex; Enterobacter cloacae; Enterobacter cloacae EcWSU1	1	15	2	4619
Enterobacter cloacae SCF1	Bacteria; Proteobacteria; Gammaproteobacteria; Enterobacteriales; Enterobacteriaceae; Enterobacter; Enterobacter cloacae complex; Enterobacter cloacae; Enterobacter cloacae SCF1	1	13	2	4399
Enterobacter cloacae subsp. cloacae ATCC 13047	Bacteria; Proteobacteria; Gammaproteobacteria; Enterobacteriales; Enterobacteriaceae; Enterobacter; Enterobacter cloacae complex; Enterobacter cloacae; Enterobacter cloacae subsp. cloacae; Enterobacter cloacae subsp. cloacae ATCC 13047	1	13	2	5518
Enterobacter cloacae subsp. dissolvens SDM	Bacteria; Proteobacteria; Gammaproteobacteria; Enterobacteriales; Enterobacteriaceae; Enterobacter; Enterobacter cloacae complex; Enterobacter cloacae; Enterobacter cloacae subsp. dissolvens; Enterobacter cloacae subsp. dissolvens SDM	1	14	2	4542
Enterobacter sp. 638	Bacteria; Proteobacteria; Gammaproteobacteria; Enterobacteriales; Enterobacteriaceae; Enterobacter; Enterobacter sp. 638	1	16	1	4240
Enterococcus faecalis 62	Bacteria; Firmicutes; Bacilli; Lactobacillales; Enterococcaceae; Enterococcus; Enterococcus faecalis; Enterococcus faecalis 62	3	7	1	3075
Enterococcus faecalis D32	Bacteria; Firmicutes; Bacilli; Lactobacillales; Enterococcaceae; Enterococcus; Enterococcus faecalis; Enterococcus faecalis D32	4	6	1	2965
Enterococcus faecalis OG1RF	Bacteria; Firmicutes; Bacilli; Lactobacillales; Enterococcaceae; Enterococcus; Enterococcus faecalis; Enterococcus faecalis OG1RF	3	5	1	2579
Enterococcus faecalis V583	Bacteria; Firmicutes; Bacilli; Lactobacillales; Enterococcaceae; Enterococcus; Enterococcus faecalis; Enterococcus faecalis V583	4	6	1	3264
Enterococcus faecium Aus0004	Bacteria; Firmicutes; Bacilli; Lactobacillales; Enterococcaceae; Enterococcus; Enterococcus faecium; Enterococcus faecium Aus0004	3	2	0	2932
Enterococcus faecium DO	Bacteria; Firmicutes; Bacilli; Lactobacillales; Enterococcaceae; Enterococcus; Enterococcus faecium; Enterococcus faecium DO	2	2	0	3114
Enterococcus hirae ATCC 9790	Bacteria; Firmicutes; Bacilli; Lactobacillales; Enterococcaceae; Enterococcus; Enterococcus hirae; Enterococcus hirae ATCC 9790	3	1	1	2755
Erwinia amylovora ATCC 49946	Bacteria; Proteobacteria; Gammaproteobacteria; Enterobacteriales; Enterobacteriaceae; Erwinia; Erwinia amylovora; Erwinia amylovora ATCC 49946	0	13	1	3565
Erwinia amylovora CFBP1430	Bacteria; Proteobacteria; Gammaproteobacteria; Enterobacteriales; Enterobacteriaceae; Erwinia; Erwinia amylovora; Erwinia amylovora CFBP1430	0	13	1	3706
Erwinia billingiae Eb661	Bacteria; Proteobacteria; Gammaproteobacteria; Enterobacteriales; Enterobacteriaceae; Erwinia; Erwinia billingiae; Erwinia billingiae Eb661	2	19	0	4917
Erwinia pyrifoliae DSM 12163	Bacteria; Proteobacteria; Gammaproteobacteria; Enterobacteriales; Enterobacteriaceae; Erwinia; Erwinia pyrifoliae; Erwinia pyrifoliae DSM 12163	0	12	1	4018
Erwinia pyrifoliae Ep1/96	Bacteria; Proteobacteria; Gammaproteobacteria; Enterobacteriales; Enterobacteriaceae; Erwinia; Erwinia pyrifoliae; Erwinia pyrifoliae Ep1/96	0	12	1	3697
Erwinia sp. Ejp617	Bacteria; Proteobacteria; Gammaproteobacteria; Enterobacteriales; Enterobacteriaceae; Erwinia; Erwinia sp. Ejp617	0	12	1	3672
Erwinia tasmaniensis Et1/99	Bacteria; Proteobacteria; Gammaproteobacteria; Enterobacteriales; Enterobacteriaceae; Erwinia; Erwinia tasmaniensis; Erwinia tasmaniensis Et1/99	1	13	2	3622
Erysipelothrix rhusiopathiae str. Fujisawa	Bacteria; Firmicutes; Erysipelotrichi; Erysipelotrichales; Erysipelotrichaceae; Erysipelothrix; Erysipelothrix rhusiopathiae; Erysipelothrix rhusiopathiae str. Fujisawa	1	2	1
Erythrobacter litoralis HTCC2594	Bacteria; Proteobacteria; Alphaproteobacteria; Sphingomonadales; Erythrobacteraceae; Erythrobacter; Erythrobacter litoralis; Erythrobacter litoralis HTCC2594	0	19	1	3011
Escherichia blattae DSM 4481 superfamily	Bacteria; Proteobacteria; Gammaproteobacteria; Enterobacteriales; Enterobacteriaceae; Escherichia; Escherichia blattae; Escherichia blattae DSM 4481	1	17	1	3904
Escherichia coli 'BL21-Gold(DE3)pLysS AG'	Bacteria; Proteobacteria; Gammaproteobacteria; Enterobacteriales; Enterobacteriaceae; Escherichia; Escherichia coli; Escherichia coli 'BL21-Gold(DE3)pLysS AG'	1	9	1	4228
Escherichia coli 042	Bacteria; Proteobacteria; Gammaproteobacteria; Enterobacteriales; Enterobacteriaceae; Escherichia; Escherichia coli; Escherichia coli O44:H18; Escherichia coli 042	1	18	3	4920
Escherichia coli 536	Bacteria; Proteobacteria; Gammaproteobacteria; Enterobacteriales; Enterobacteriaceae; Escherichia; Escherichia coli; Escherichia coli 536	0	16	1	4920
Escherichia coli 55989	Bacteria; Proteobacteria; Gammaproteobacteria; Enterobacteriales; Enterobacteriaceae; Escherichia; Escherichia coli; Escherichia coli 55989	0	17	1	4759
Escherichia coli ABU 83972	Bacteria; Proteobacteria; Gammaproteobacteria; Enterobacteriales; Enterobacteriaceae; Escherichia; Escherichia coli; Escherichia coli ABU 83972	0	17	1	4796
Escherichia coli APEC O1	Bacteria; Proteobacteria; Gammaproteobacteria; Enterobacteriales; Enterobacteriaceae; Escherichia; Escherichia coli; Escherichia coli APEC O1	0	17	1	4853
Escherichia coli ATCC 8739	Bacteria; Proteobacteria; Gammaproteobacteria; Enterobacteriales; Enterobacteriaceae; Escherichia; Escherichia coli; Escherichia coli C; Escherichia coli ATCC 8739	1	17	1	4199
Escherichia coli B str. REL606	Bacteria; Proteobacteria; Gammaproteobacteria; Enterobacteriales; Enterobacteriaceae; Escherichia; Escherichia coli; Escherichia coli B; Escherichia coli B str. REL606	1	16	1	4204
Escherichia coli BL21(DE3)	Bacteria; Proteobacteria; Gammaproteobacteria; Enterobacteriales; Enterobacteriaceae; Escherichia; Escherichia coli; Escherichia coli BL21(DE3)	1	15	1	4157
Escherichia coli BL21(DE3)	Bacteria; Proteobacteria; Gammaproteobacteria; Enterobacteriales; Enterobacteriaceae; Escherichia; Escherichia coli; Escherichia coli BL21(DE3)	1	15	1	4204
Escherichia coli BW2952	Bacteria; Proteobacteria; Gammaproteobacteria; Enterobacteriales; Enterobacteriaceae; Escherichia; Escherichia coli; Escherichia coli K-12; Escherichia coli BW2952	1	18	1	4084
Escherichia coli CFT073	Bacteria; Proteobacteria; Gammaproteobacteria; Enterobacteriales; Enterobacteriaceae; Escherichia; Escherichia coli; Escherichia coli CFT073	0	20	1	5369
Escherichia coli DH1	Bacteria; Proteobacteria; Gammaproteobacteria; Enterobacteriales; Enterobacteriaceae; Escherichia; Escherichia coli; Escherichia coli DH1	1	17	3	4160
Escherichia coli DH1	Bacteria; Proteobacteria; Gammaproteobacteria; Enterobacteriales; Enterobacteriaceae; Escherichia; Escherichia coli; Escherichia coli DH1	1	17	2	4259
Escherichia coli E24377A	Bacteria; Proteobacteria; Gammaproteobacteria; Enterobacteriales; Enterobacteriaceae; Escherichia; Escherichia coli; Escherichia coli E24377A	1	17	4	4991
Escherichia coli ED1a	Bacteria; Proteobacteria; Gammaproteobacteria; Enterobacteriales; Enterobacteriaceae; Escherichia; Escherichia coli; Escherichia coli ED1a	0	15	0	4915
Escherichia coli ETEC H10407	Bacteria; Proteobacteria; Gammaproteobacteria; Enterobacteriales; Enterobacteriaceae; Escherichia; Escherichia coli; Escherichia coli ETEC H10407	0	18	3	4874
Escherichia coli HS	Bacteria; Proteobacteria; Gammaproteobacteria; Enterobacteriales; Enterobacteriaceae; Escherichia; Escherichia coli; Escherichia coli HS	1	15	1	4377
Escherichia coli IAI1	Bacteria; Proteobacteria; Gammaproteobacteria; Enterobacteriales; Enterobacteriaceae; Escherichia; Escherichia coli; Escherichia coli IAI1	0	16	1	4349
Escherichia coli IAI39	Bacteria; Proteobacteria; Gammaproteobacteria; Enterobacteriales; Enterobacteriaceae; Escherichia; Escherichia coli; Escherichia coli IAI39	1	21	2	4730
Escherichia coli IHE3034	Bacteria; Proteobacteria; Gammaproteobacteria; Enterobacteriales; Enterobacteriaceae; Escherichia; Escherichia coli; Escherichia coli IHE3034	0	16	1	4757
Escherichia coli KO11FL	Bacteria; Proteobacteria; Gammaproteobacteria; Enterobacteriales; Enterobacteriaceae; Escherichia; Escherichia coli; Escherichia coli KO11FL	1	19	1	4653
Escherichia coli KO11FL	Bacteria; Proteobacteria; Gammaproteobacteria; Enterobacteriales; Enterobacteriaceae; Escherichia; Escherichia coli; Escherichia coli KO11FL	1	19	1	4709
Escherichia coli LF82	Bacteria; Proteobacteria; Gammaproteobacteria; Enterobacteriales; Enterobacteriaceae; Escherichia; Escherichia coli; Escherichia coli LF82	0	17	1	4376
Escherichia coli NA114	Bacteria; Proteobacteria; Gammaproteobacteria; Enterobacteriales; Enterobacteriaceae; Escherichia; Escherichia coli; Escherichia coli NA114	0	18	1	4873
Escherichia coli O103:H2 str. 12009	Bacteria; Proteobacteria; Gammaproteobacteria; Enterobacteriales; Enterobacteriaceae; Escherichia; Escherichia coli; Escherichia coli O103:H2; Escherichia coli O103:H2 str. 12009	1	18	1	5121
Escherichia coli O111:H- str. 11128	Bacteria; Proteobacteria; Gammaproteobacteria; Enterobacteriales; Enterobacteriaceae; Escherichia; Escherichia coli; Escherichia coli O111:H-; Escherichia coli O111:H- str. 11128	1	15	1	5407
Escherichia coli O127:H6 str. E2348/69	Bacteria; Proteobacteria; Gammaproteobacteria; Enterobacteriales; Enterobacteriaceae; Escherichia; Escherichia coli; Escherichia coli O127:H6; Escherichia coli O127:H6 str. E2348/69	0	16	1	4651
Escherichia coli O157:H7 str. EC4115	Bacteria; Proteobacteria; Gammaproteobacteria; Enterobacteriales; Enterobacteriaceae; Escherichia; Escherichia coli; Escherichia coli O157:H7; Escherichia coli O157:H7 str. EC4115	1	18	4	5477
Escherichia coli O157:H7 str. EDL933	Bacteria; Proteobacteria; Gammaproteobacteria; Enterobacteriales; Enterobacteriaceae; Escherichia; Escherichia coli; Escherichia coli O157:H7; Escherichia coli O157:H7 str. EDL933	1	19	3	5397
Escherichia coli O157:H7 str. Sakai	Bacteria; Proteobacteria; Gammaproteobacteria; Enterobacteriales; Enterobacteriaceae; Escherichia; Escherichia coli; Escherichia coli O157:H7; Escherichia coli O157:H7 str. Sakai	0	19	3	5318
Escherichia coli O157:H7 str. TW14359	Bacteria; Proteobacteria; Gammaproteobacteria; Enterobacteriales; Enterobacteriaceae; Escherichia; Escherichia coli; Escherichia coli O157:H7; Escherichia coli O157:H7 str. TW14359	0	19	4	5365
Escherichia coli O26:H11 str. 11368	Bacteria; Proteobacteria; Gammaproteobacteria; Enterobacteriales; Enterobacteriaceae; Escherichia; Escherichia coli; Escherichia coli O26:H11; Escherichia coli O26:H11 str. 11368	1	17	1	5519
Escherichia coli O55:H7 str. CB9615	Bacteria; Proteobacteria; Gammaproteobacteria; Enterobacteriales; Enterobacteriaceae; Escherichia; Escherichia coli; Escherichia coli O55:H7; Escherichia coli O55:H7 str. CB9615	1	18	3	5121
Escherichia coli O55:H7 str. RM12579	Bacteria; Proteobacteria; Gammaproteobacteria; Enterobacteriales; Enterobacteriaceae; Escherichia; Escherichia coli; Escherichia coli O55:H7; Escherichia coli O55:H7 str. RM12579	0	18	3	5128
Escherichia coli O7:K1 str. CE10	Bacteria; Proteobacteria; Gammaproteobacteria; Enterobacteriales; Enterobacteriaceae; Escherichia; Escherichia coli; Escherichia coli O7:K1; Escherichia coli O7:K1 str. CE10	1	23	2	5080
Escherichia coli O83:H1 str. NRG 857C	Bacteria; Proteobacteria; Gammaproteobacteria; Enterobacteriales; Enterobacteriaceae; Escherichia; Escherichia coli; Escherichia coli O83:H1; Escherichia coli O83:H1 str. NRG 857C	0	17	1	4582
Escherichia coli P12b	Bacteria; Proteobacteria; Gammaproteobacteria; Enterobacteriales; Enterobacteriaceae; Escherichia; Escherichia coli; Escherichia coli P12b	1	18	3	4393
Escherichia coli S88	Bacteria; Proteobacteria; Gammaproteobacteria; Enterobacteriales; Enterobacteriaceae; Escherichia; Escherichia coli; Escherichia coli S88	0	16	1	4827
Escherichia coli SE11	Bacteria; Proteobacteria; Gammaproteobacteria; Enterobacteriales; Enterobacteriaceae; Escherichia; Escherichia coli; Escherichia coli SE11	1	18	2	4998
Escherichia coli SE15	Bacteria; Proteobacteria; Gammaproteobacteria; Enterobacteriales; Enterobacteriaceae; Escherichia; Escherichia coli; Escherichia coli SE15	0	19	1	4488
Escherichia coli SMS-3-5	Bacteria; Proteobacteria; Gammaproteobacteria; Enterobacteriales; Enterobacteriaceae; Escherichia; Escherichia coli; Escherichia coli SMS-3-5	2	18	2	4912
Escherichia coli str. 'clone D i14'	Bacteria; Proteobacteria; Gammaproteobacteria; Enterobacteriales; Enterobacteriaceae; Escherichia; Escherichia coli; Escherichia coli str. 'clone D i14'	0	17	1	4919
Escherichia coli str. 'clone D i2'	Bacteria; Proteobacteria; Gammaproteobacteria; Enterobacteriales; Enterobacteriaceae; Escherichia; Escherichia coli; Escherichia coli str. 'clone D i2'	0	17	1	4919
Escherichia coli str. K-12 substr. DH10B	Bacteria; Proteobacteria; Gammaproteobacteria; Enterobacteriales; Enterobacteriaceae; Escherichia; Escherichia coli; Escherichia coli K-12; Escherichia coli str. K-12 substr. DH10B	1	19	2	4128
Escherichia coli str. K-12 substr. MG1655	Bacteria; Proteobacteria; Gammaproteobacteria; Enterobacteriales; Enterobacteriaceae; Escherichia; Escherichia coli; Escherichia coli K-12; Escherichia coli str. K-12 substr. MG1655	1	18	2	4145
Escherichia coli str. K-12 substr. W3110	Bacteria; Proteobacteria; Gammaproteobacteria; Enterobacteriales; Enterobacteriaceae; Escherichia; Escherichia coli; Escherichia coli K-12; Escherichia coli str. K-12 substr. W3110	1	18	2	4217
Escherichia coli UM146	Bacteria; Proteobacteria; Gammaproteobacteria; Enterobacteriales; Enterobacteriaceae; Escherichia; Escherichia coli; Escherichia coli UM146	0	15	1	4783
Escherichia coli UMN026	Bacteria; Proteobacteria; Gammaproteobacteria; Enterobacteriales; Enterobacteriaceae; Escherichia; Escherichia coli; Escherichia coli UMN026	1	18	3	5014
Escherichia coli UMNK88	Bacteria; Proteobacteria; Gammaproteobacteria; Enterobacteriales; Enterobacteriaceae; Escherichia; Escherichia coli; Escherichia coli UMNK88	2	16	2	5607
Escherichia coli UTI89	Bacteria; Proteobacteria; Gammaproteobacteria; Enterobacteriales; Enterobacteriaceae; Escherichia; Escherichia coli; Escherichia coli UTI89	0	16	1	5162
Escherichia coli W	Bacteria; Proteobacteria; Gammaproteobacteria; Enterobacteriales; Enterobacteriaceae; Escherichia; Escherichia coli; Escherichia coli W	2	19	1	4731
Escherichia coli W	Bacteria; Proteobacteria; Gammaproteobacteria; Enterobacteriales; Enterobacteriaceae; Escherichia; Escherichia coli; Escherichia coli W	1	19	1	4606
Escherichia coli Xuzhou21	Bacteria; Proteobacteria; Gammaproteobacteria; Enterobacteriales; Enterobacteriaceae; Escherichia; Escherichia coli; Escherichia coli Xuzhou21	1	19	3	5183
Escherichia fergusonii ATCC 35469	Bacteria; Proteobacteria; Gammaproteobacteria; Enterobacteriales; Enterobacteriaceae; Escherichia; Escherichia fergusonii; Escherichia fergusonii ATCC 35469	2	16	2	4318
Ethanoligenens harbinense YUAN-3	Bacteria; Firmicutes; Clostridia; Clostridiales; Ruminococcaceae; Ethanoligenens; Ethanoligenens harbinense; Ethanoligenens harbinense YUAN-3	4	9	1	2701
Eubacterium eligens ATCC 27750	Bacteria; Firmicutes; Clostridia; Clostridiales; Eubacteriaceae; Eubacterium; Eubacterium eligens; Eubacterium eligens ATCC 27750	3	6	0	2668
Eubacterium limosum KIST612	Bacteria; Firmicutes; Clostridia; Clostridiales; Eubacteriaceae; Eubacterium; Eubacterium limosum; Eubacterium limosum KIST612	3	6	0	4579
Eubacterium rectale ATCC 33656	Bacteria; Firmicutes; Clostridia; Clostridiales; Eubacteriaceae; Eubacterium; Eubacterium rectale; Eubacterium rectale ATCC 33656	2	15	1	3621
Exiguobacterium sibiricum 255-15	Bacteria; Firmicutes; Bacilli; Bacillales; Bacillales incertae sedis; Bacillales Family XII. Incertae Sedis; Exiguobacterium; Exiguobacterium sibiricum; Exiguobacterium sibiricum 255-15	5	8	3	3015
Exiguobacterium sp. AT1b	Bacteria; Firmicutes; Bacilli; Bacillales; Bacillales incertae sedis; Bacillales Family XII. Incertae Sedis; Exiguobacterium; Exiguobacterium sp. AT1b	3	9	1	3020
Ferrimonas balearica DSM 9799	Bacteria; Proteobacteria; Gammaproteobacteria; Alteromonadales; Ferrimonadaceae; Ferrimonas; Ferrimonas balearica; Ferrimonas balearica DSM 9799	0	28	1	3782
Fervidobacterium nodosum Rt17-B1	Bacteria; Thermotogae; Thermotogae; Thermotogales; Thermotogaceae; Fervidobacterium; Fervidobacterium nodosum; Fervidobacterium nodosum Rt17-B1	1	15	0	1750
Fervidobacterium pennivorans DSM 9078	Bacteria; Thermotogae; Thermotogae; Thermotogales; Thermotogaceae; Fervidobacterium; Fervidobacterium pennivorans; Fervidobacterium pennivorans DSM 9078	2	15	0	1947
Fibrobacter succinogenes subsp. succinogenes S85	Bacteria; Fibrobacteres/Acidobacteria group; Fibrobacteres; Fibrobacteria; Fibrobacterales; Fibrobacteraceae; Fibrobacter; Fibrobacter succinogenes; Fibrobacter succinogenes subsp. succinogenes; Fibrobacter succinogenes subsp. succinogenes S85	2	29	2	3085
Fibrobacter succinogenes subsp. succinogenes S85	Bacteria; Fibrobacteres/Acidobacteria group; Fibrobacteres; Fibrobacteria; Fibrobacterales; Fibrobacteraceae; Fibrobacter; Fibrobacter succinogenes; Fibrobacter succinogenes subsp. succinogenes; Fibrobacter succinogenes subsp. succinogenes S85	2	24	1	2871
Filifactor alocis ATCC 35896	Bacteria; Firmicutes; Clostridia; Clostridiales; Peptostreptococcaceae; Filifactor; Filifactor alocis; Filifactor alocis ATCC 35896	4	5	1	1641
Finegoldia magna ATCC 29328	Bacteria; Firmicutes; Clostridia; Clostridiales; Clostridiales incertae sedis; Clostridiales Family XI. Incertae Sedis; Finegoldia; Finegoldia magna; Finegoldia magna ATCC 29328	1	2	0	1813
Flavobacteriaceae bacterium 3519-10	Bacteria; Bacteroidetes/Chlorobi group; Bacteroidetes; Flavobacteriia; Flavobacteriales; Flavobacteriaceae; unclassified Flavobacteriaceae; Flavobacteriaceae bacterium 3519-10	3	30	0	2534
Flavobacterium branchiophilum FL-15	Bacteria; Bacteroidetes/Chlorobi group; Bacteroidetes; Flavobacteriia; Flavobacteriales; Flavobacteriaceae; Flavobacterium; Flavobacterium branchiophilum; Flavobacterium branchiophilum FL-15	2	33	2	2872
Flavobacterium columnare ATCC 49512	Bacteria; Bacteroidetes/Chlorobi group; Bacteroidetes; Flavobacteriia; Flavobacteriales; Flavobacteriaceae; Flavobacterium; Flavobacterium columnare; Flavobacterium columnare ATCC 49512	2	33	2	2642
Flavobacterium indicum GPTSA100-9	Bacteria; Bacteroidetes/Chlorobi group; Bacteroidetes; Flavobacteriia; Flavobacteriales; Flavobacteriaceae; Flavobacterium; Flavobacterium indicum; Flavobacterium indicum GPTSA100-9	2	35	2	2671
Flavobacterium johnsoniae UW101	Bacteria; Bacteroidetes/Chlorobi group; Bacteroidetes; Flavobacteriia; Flavobacteriales; Flavobacteriaceae; Flavobacterium; Flavobacterium johnsoniae; Flavobacterium johnsoniae UW101	6	101	6	5017
Flavobacterium psychrophilum JIP02/86	Bacteria; Bacteroidetes/Chlorobi group; Bacteroidetes; Flavobacteriia; Flavobacteriales; Flavobacteriaceae; Flavobacterium; Flavobacterium psychrophilum; Flavobacterium psychrophilum JIP02/86	1	24	1	2446
Flexibacter litoralis DSM 6794	Bacteria; Bacteroidetes/Chlorobi group; Bacteroidetes; Cytophagia; Cytophagales; Cytophagaceae; Flexibacter; Flexibacter litoralis; Flexibacter litoralis DSM 6794	5	80	0	3878
Flexistipes sinusarabici DSM 4947	Bacteria; Deferribacteres; Deferribacteres; Deferribacterales; Deferribacteraceae; Flexistipes; Flexistipes sinusarabici; Flexistipes sinusarabici DSM 4947	1	18	0	2261
Fluviicola taffensis DSM 16823	Bacteria; Bacteroidetes/Chlorobi group; Bacteroidetes; Flavobacteriia; Flavobacteriales; Cryomorphaceae; Fluviicola; Fluviicola taffensis; Fluviicola taffensis DSM 16823	6	66	3	4033
Francisella cf. novicida 3523	Bacteria; Proteobacteria; Gammaproteobacteria; Thiotrichales; Francisellaceae; Francisella; Francisella novicida; Francisella cf. novicida 3523	4	4	5	1854
Francisella cf. novicida Fx1	Bacteria; Proteobacteria; Gammaproteobacteria; Thiotrichales; Francisellaceae; Francisella; Francisella novicida; Francisella cf. novicida Fx1	3	4	1	1818
Francisella noatunensis subsp. orientalis str. Toba 04	Bacteria; Proteobacteria; Gammaproteobacteria; Thiotrichales; Francisellaceae; Francisella; Francisella noatunensis; Francisella noatunensis subsp. orientalis; Francisella noatunensis subsp. orientalis str. Toba 04	0	4	1	1595
Francisella novicida U112	Bacteria; Proteobacteria; Gammaproteobacteria; Thiotrichales; Francisellaceae; Francisella; Francisella novicida; Francisella novicida U112	1	4	3	1719
Francisella philomiragia subsp. philomiragia ATCC 25017	Bacteria; Proteobacteria; Gammaproteobacteria; Thiotrichales; Francisellaceae; Francisella; Francisella philomiragia; Francisella philomiragia subsp. philomiragia ATCC 25017	0	5	1	1915
Francisella sp. TX077308	Bacteria; Proteobacteria; Gammaproteobacteria; Thiotrichales; Francisellaceae; Francisella; Francisella sp. TX077308	0	5	1	1976
Francisella tularensis subsp. holarctica FTNF002-00	Bacteria; Proteobacteria; Gammaproteobacteria; Thiotrichales; Francisellaceae; Francisella; Francisella tularensis; Francisella tularensis subsp. holarctica; Francisella tularensis subsp. holarctica FTNF002-00	0	4	1	1581
Francisella tularensis subsp. holarctica LVS	Bacteria; Proteobacteria; Gammaproteobacteria; Thiotrichales; Francisellaceae; Francisella; Francisella tularensis; Francisella tularensis subsp. holarctica; Francisella tularensis subsp. holarctica LVS	0	4	1	1754
Francisella tularensis subsp. holarctica OSU18	Bacteria; Proteobacteria; Gammaproteobacteria; Thiotrichales; Francisellaceae; Francisella; Francisella tularensis; Francisella tularensis subsp. holarctica; Francisella tularensis subsp. holarctica OSU18	0	4	1	1555
Francisella tularensis subsp. mediasiatica FSC147	Bacteria; Proteobacteria; Gammaproteobacteria; Thiotrichales; Francisellaceae; Francisella; Francisella tularensis; Francisella tularensis subsp. mediasiatica; Francisella tularensis subsp. mediasiatica FSC147	0	4	0	1406
Francisella tularensis subsp. tularensis FSC198	Bacteria; Proteobacteria; Gammaproteobacteria; Thiotrichales; Francisellaceae; Francisella; Francisella tularensis; Francisella tularensis subsp. tularensis; Francisella tularensis subsp. tularensis FSC198	0	3	1	1605
Francisella tularensis subsp. tularensis NE061598	Bacteria; Proteobacteria; Gammaproteobacteria; Thiotrichales; Francisellaceae; Francisella; Francisella tularensis; Francisella tularensis subsp. tularensis; Francisella tularensis subsp. tularensis NE061598	0	4	1	1836
Francisella tularensis subsp. tularensis SCHU S4	Bacteria; Proteobacteria; Gammaproteobacteria; Thiotrichales; Francisellaceae; Francisella; Francisella tularensis; Francisella tularensis subsp. tularensis; Francisella tularensis subsp. tularensis SCHU S4	0	3	1	1604
Francisella tularensis subsp. tularensis TI0902	Bacteria; Proteobacteria; Gammaproteobacteria; Thiotrichales; Francisellaceae; Francisella; Francisella tularensis; Francisella tularensis subsp. tularensis; Francisella tularensis subsp. tularensis TI0902	0	3	1	1544
Francisella tularensis subsp. tularensis TIGB03	Bacteria; Proteobacteria; Gammaproteobacteria; Thiotrichales; Francisellaceae; Francisella; Francisella tularensis; Francisella tularensis subsp. tularensis; Francisella tularensis subsp. tularensis TI0902; Francisella tularensis subsp. tularensis TIGB03	0	3	1	1624
Francisella tularensis subsp. tularensis WY96-3418	Bacteria; Proteobacteria; Gammaproteobacteria; Thiotrichales; Francisellaceae; Francisella; Francisella tularensis; Francisella tularensis subsp. tularensis; Francisella tularensis subsp. tularensis WY96-3418	0	3	1	1634
Frankia alni ACN14a	Bacteria; Actinobacteria; Actinobacteria; Actinobacteridae; Actinomycetales; Frankineae; Frankiaceae; Frankia; Frankia alni; Frankia alni ACN14a	2	42	1	6707
Frankia sp. CcI3	Bacteria; Actinobacteria; Actinobacteria; Actinobacteridae; Actinomycetales; Frankineae; Frankiaceae; Frankia; Frankia sp. CcI3	0	38	0	4499
Frankia sp. EAN1pec	Bacteria; Actinobacteria; Actinobacteria; Actinobacteridae; Actinomycetales; Frankineae; Frankiaceae; Frankia; Frankia sp. EAN1pec	4	67	0	7191
Frankia sp. EuI1c	Bacteria; Actinobacteria; Actinobacteria; Actinobacteridae; Actinomycetales; Frankineae; Frankiaceae; Frankia; Frankia sp. EuI1c	5	52	2	7083
Frankia symbiont of Datisca glomerata	Bacteria; Actinobacteria; Actinobacteria; Actinobacteridae; Actinomycetales; Frankineae; Frankiaceae; Frankia; Frankia symbiont of Datisca glomerata	0	18	0	4215
Frateuria aurantia DSM 6220	Bacteria; Proteobacteria; Gammaproteobacteria; Xanthomonadales; Xanthomonadaceae; Frateuria; Frateuria aurantia; Frateuria aurantia DSM 6220	1	24	1	3101
Fusobacterium nucleatum subsp. nucleatum ATCC 25586	Bacteria; Fusobacteria; Fusobacteriia; Fusobacteriales; Fusobacteriaceae; Fusobacterium; Fusobacterium nucleatum; Fusobacterium nucleatum subsp. nucleatum; Fusobacterium nucleatum subsp. nucleatum ATCC 25586	2	13	3	2063
Gallibacterium anatis UMN179	Bacteria; Proteobacteria; Gammaproteobacteria; Pasteurellales; Pasteurellaceae; Gallibacterium; Gallibacterium anatis; Gallibacterium anatis UMN179	0	13	0	2500
Gallionella capsiferriformans ES-2	Bacteria; Proteobacteria; Betaproteobacteria; Gallionellales; Gallionellaceae; Gallionella; Gallionella capsiferriformans; Gallionella capsiferriformans ES-2	3	27	2	2894
gamma proteobacterium HdN1	Bacteria; Proteobacteria; Gammaproteobacteria; unclassified Gammaproteobacteria; unclassified Gammaproteobacteria (miscellaneous); gamma proteobacterium HdN1	0	26	2	3763
Gardnerella vaginalis 409-05	Bacteria; Actinobacteria; Actinobacteria; Actinobacteridae; Bifidobacteriales; Bifidobacteriaceae; Gardnerella; Gardnerella vaginalis; Gardnerella vaginalis 409-05	0	4	0	1263
Gardnerella vaginalis ATCC 14019	Bacteria; Actinobacteria; Actinobacteria; Actinobacteridae; Bifidobacteriales; Bifidobacteriaceae; Gardnerella; Gardnerella vaginalis; Gardnerella vaginalis ATCC 14019	1	4	0	1365
Gardnerella vaginalis HMP9231	Bacteria; Actinobacteria; Actinobacteria; Actinobacteridae; Bifidobacteriales; Bifidobacteriaceae; Gardnerella; Gardnerella vaginalis; Gardnerella vaginalis HMP9231	1	4	0	1317
Gemmatimonas aurantiaca T-27	Bacteria; Gemmatimonadetes; Gemmatimonadetes; Gemmatimonadales; Gemmatimonadaceae; Gemmatimonas; Gemmatimonas aurantiaca; Gemmatimonas aurantiaca T-27	11	63	8	3935
Geobacillus kaustophilus HTA426	Bacteria; Firmicutes; Bacilli; Bacillales; Bacillaceae; Geobacillus; Geobacillus kaustophilus; Geobacillus kaustophilus HTA426	4	8	0	3539
Geobacillus sp. C56-T3	Bacteria; Firmicutes; Bacilli; Bacillales; Bacillaceae; Geobacillus; Geobacillus sp. C56-T3	5	8	0	3315
Geobacillus sp. WCH70	Bacteria; Firmicutes; Bacilli; Bacillales; Bacillaceae; Geobacillus; Geobacillus sp. WCH70	2	6	0	3168
Geobacillus sp. Y4.1MC1	Bacteria; Firmicutes; Bacilli; Bacillales; Bacillaceae; Geobacillus; Geobacillus sp. Y4.1MC1	4	10	0	3669
Geobacillus sp. Y412MC52	Bacteria; Firmicutes; Bacilli; Bacillales; Bacillaceae; Geobacillus; Geobacillus sp. Y412MC52	5	8	0	3459
Geobacillus sp. Y412MC61	Bacteria; Firmicutes; Bacilli; Bacillales; Bacillaceae; Geobacillus; Geobacillus sp. Y412MC61	4	8	0	3446
Geobacillus thermodenitrificans NG80-2	Bacteria; Firmicutes; Bacilli; Bacillales; Bacillaceae; Geobacillus; Geobacillus thermodenitrificans; Geobacillus thermodenitrificans NG80-2	3	8	0	3445
Geobacillus thermoglucosidasius C56-YS93	Bacteria; Firmicutes; Bacilli; Bacillales; Bacillaceae; Geobacillus; Geobacillus thermoglucosidasius; Geobacillus thermoglucosidasius C56-YS93	5	11	0	3759
Geobacillus thermoleovorans CCB_US3_UF5	Bacteria; Firmicutes; Bacilli; Bacillales; Bacillaceae; Geobacillus; Geobacillus thermoleovorans; Geobacillus thermoleovorans CCB_US3_UF5	4	9	0	3881
Geobacter bemidjiensis Bem	Bacteria; Proteobacteria; delta/epsilon subdivisions; Deltaproteobacteria; Desulfuromonadales; Geobacteraceae; Geobacter; Geobacter bemidjiensis; Geobacter bemidjiensis Bem	6	49	2	4057
Geobacter daltonii FRC-32	Bacteria; Proteobacteria; delta/epsilon subdivisions; Deltaproteobacteria; Desulfuromonadales; Geobacteraceae; Geobacter; Geobacter daltonii; Geobacter daltonii FRC-32	7	43	1	3798
Geobacter lovleyi SZ	Bacteria; Proteobacteria; delta/epsilon subdivisions; Deltaproteobacteria; Desulfuromonadales; Geobacteraceae; Geobacter; Geobacter lovleyi; Geobacter lovleyi SZ	3	42	1	3685
Geobacter metallireducens GS-15	Bacteria; Proteobacteria; delta/epsilon subdivisions; Deltaproteobacteria; Desulfuromonadales; Geobacteraceae; Geobacter; Geobacter metallireducens; Geobacter metallireducens GS-15	7	37	5	3568
Geobacter sp. M18	Bacteria; Proteobacteria; delta/epsilon subdivisions; Deltaproteobacteria; Desulfuromonadales; Geobacteraceae; Geobacter; Geobacter sp. M18	7	58	2	4434
Geobacter sp. M21	Bacteria; Proteobacteria; delta/epsilon subdivisions; Deltaproteobacteria; Desulfuromonadales; Geobacteraceae; Geobacter; Geobacter sp. M21	5	56	7	4080
Geobacter sulfurreducens KN400	Bacteria; Proteobacteria; delta/epsilon subdivisions; Deltaproteobacteria; Desulfuromonadales; Geobacteraceae; Geobacter; Geobacter sulfurreducens; Geobacter sulfurreducens KN400	7	34	2	3324
Geobacter sulfurreducens PCA	Bacteria; Proteobacteria; delta/epsilon subdivisions; Deltaproteobacteria; Desulfuromonadales; Geobacteraceae; Geobacter; Geobacter sulfurreducens; Geobacter sulfurreducens PCA	7	35	2	3432
Geobacter uraniireducens Rf4	Bacteria; Proteobacteria; delta/epsilon subdivisions; Deltaproteobacteria; Desulfuromonadales; Geobacteraceae; Geobacter; Geobacter uraniireducens; Geobacter uraniireducens Rf4	6	45	3	4358
Geodermatophilus obscurus DSM 43160	Bacteria; Actinobacteria; Actinobacteria; Actinobacteridae; Actinomycetales; Frankineae; Geodermatophilaceae; Geodermatophilus; Geodermatophilus obscurus; Geodermatophilus obscurus DSM 43160	1	28	2	4810
Glaciecola nitratireducens FR1064	Bacteria; Proteobacteria; Gammaproteobacteria; Alteromonadales; Alteromonadaceae; Glaciecola; Glaciecola nitratireducens; Glaciecola nitratireducens FR1064	2	41	1	3654
Glaciecola sp. 4H-3-7+YE-5	Bacteria; Proteobacteria; Gammaproteobacteria; Alteromonadales; Alteromonadaceae; Glaciecola; Glaciecola sp. 4H-3-7+YE-5	2	39	1	4547
Gloeobacter violaceus PCC 7421	Bacteria; Cyanobacteria; Gloeobacteria; Gloeobacterales; Gloeobacter; Gloeobacter violaceus; Gloeobacter violaceus PCC 7421	17	56	3	4430
Gluconacetobacter diazotrophicus PAl 5	Bacteria; Proteobacteria; Alphaproteobacteria; Rhodospirillales; Acetobacteraceae; Gluconacetobacter; Gluconacetobacter diazotrophicus; Gluconacetobacter diazotrophicus PAl 5	1	18	2	3851
Gluconacetobacter diazotrophicus PAl 5	Bacteria; Proteobacteria; Alphaproteobacteria; Rhodospirillales; Acetobacteraceae; Gluconacetobacter; Gluconacetobacter diazotrophicus; Gluconacetobacter diazotrophicus PAl 5	1	16	2	3501
Gluconacetobacter xylinus NBRC 3288	Bacteria; Proteobacteria; Alphaproteobacteria; Rhodospirillales; Acetobacteraceae; Gluconacetobacter; Gluconacetobacter xylinus; Gluconacetobacter xylinus NBRC 3288	0	13	2	3195
Gluconobacter oxydans 621H	Bacteria; Proteobacteria; Alphaproteobacteria; Rhodospirillales; Acetobacteraceae; Gluconobacter; Gluconobacter oxydans; Gluconobacter oxydans 621H	0	10	2	2664
Gordonia bronchialis DSM 43247	Bacteria; Actinobacteria; Actinobacteria; Actinobacteridae; Actinomycetales; Corynebacterineae; Gordoniaceae; Gordonia; Gordonia bronchialis; Gordonia bronchialis DSM 43247	3	6	1	4696
Gordonia polyisoprenivorans VH2	Bacteria; Actinobacteria; Actinobacteria; Actinobacteridae; Actinomycetales; Corynebacterineae; Gordoniaceae; Gordonia; Gordonia polyisoprenivorans; Gordonia polyisoprenivorans VH2	4	13	1	5110
Gramella forsetii KT0803	Bacteria; Bacteroidetes/Chlorobi group; Bacteroidetes; Flavobacteriia; Flavobacteriales; Flavobacteriaceae; Gramella; Gramella forsetii; Gramella forsetii KT0803	2	48	0	3584
Granulibacter bethesdensis CGDNIH1	Bacteria; Proteobacteria; Alphaproteobacteria; Rhodospirillales; Acetobacteraceae; Granulibacter; Granulibacter bethesdensis; Granulibacter bethesdensis CGDNIH1	1	13	2	2433
Granulicella mallensis MP5ACTX8	Bacteria; Fibrobacteres/Acidobacteria group; Acidobacteria; Acidobacteriia; Acidobacteriales; Acidobacteriaceae; Granulicella; Granulicella mallensis; Granulicella mallensis MP5ACTX8	6	56	6	4815
Granulicella tundricola MP5ACTX9	Bacteria; Fibrobacteres/Acidobacteria group; Acidobacteria; Acidobacteriia; Acidobacteriales; Acidobacteriaceae; Granulicella; Granulicella tundricola; Granulicella tundricola MP5ACTX9	6	57	1	4542
Haemophilus ducreyi 35000HP	Bacteria; Proteobacteria; Gammaproteobacteria; Pasteurellales; Pasteurellaceae; Haemophilus; Haemophilus ducreyi; Haemophilus ducreyi 35000HP	0	9	0	1717
Haemophilus influenzae 10810	Bacteria; Proteobacteria; Gammaproteobacteria; Pasteurellales; Pasteurellaceae; Haemophilus; Haemophilus influenzae; Haemophilus influenzae 10810	0	9	0	1903
Haemophilus influenzae 86-028NP	Bacteria; Proteobacteria; Gammaproteobacteria; Pasteurellales; Pasteurellaceae; Haemophilus; Haemophilus influenzae; Haemophilus influenzae 86-028NP	0	10	0	1792
Haemophilus influenzae F3031	Bacteria; Proteobacteria; Gammaproteobacteria; Pasteurellales; Pasteurellaceae; Haemophilus; Haemophilus influenzae; Haemophilus influenzae F3031	0	9	0	1770
Haemophilus influenzae F3047	Bacteria; Proteobacteria; Gammaproteobacteria; Pasteurellales; Pasteurellaceae; Haemophilus; Haemophilus influenzae; Haemophilus influenzae F3047	0	9	0	1786
Haemophilus influenzae PittEE	Bacteria; Proteobacteria; Gammaproteobacteria; Pasteurellales; Pasteurellaceae; Haemophilus; Haemophilus influenzae; Haemophilus influenzae PittEE	0	10	0	1613
Haemophilus influenzae PittGG	Bacteria; Proteobacteria; Gammaproteobacteria; Pasteurellales; Pasteurellaceae; Haemophilus; Haemophilus influenzae; Haemophilus influenzae PittGG	0	10	0	1661
Haemophilus influenzae R2846	Bacteria; Proteobacteria; Gammaproteobacteria; Pasteurellales; Pasteurellaceae; Haemophilus; Haemophilus influenzae; Haemophilus influenzae R2846	0	9	0	1636
Haemophilus influenzae R2866	Bacteria; Proteobacteria; Gammaproteobacteria; Pasteurellales; Pasteurellaceae; Haemophilus; Haemophilus influenzae; Haemophilus influenzae R2866	0	11	0	1795
Haemophilus influenzae Rd KW20	Bacteria; Proteobacteria; Gammaproteobacteria; Pasteurellales; Pasteurellaceae; Haemophilus; Haemophilus influenzae; Haemophilus influenzae Rd KW20	0	9	0	1657
Haemophilus parainfluenzae T3T1	Bacteria; Proteobacteria; Gammaproteobacteria; Pasteurellales; Pasteurellaceae; Haemophilus; Haemophilus parainfluenzae; Haemophilus parainfluenzae T3T1	1	10	1	1975
Haemophilus parasuis SH0165	Bacteria; Proteobacteria; Gammaproteobacteria; Pasteurellales; Pasteurellaceae; Haemophilus; Haemophilus parasuis; Haemophilus parasuis SH0165	0	12	0	2021
Haemophilus somnus 129PT	Bacteria; Proteobacteria; Gammaproteobacteria; Pasteurellales; Pasteurellaceae; Histophilus; Histophilus somni; Haemophilus somnus 129PT	0	7	0	1798
Haemophilus somnus 2336	Bacteria; Proteobacteria; Gammaproteobacteria; Pasteurellales; Pasteurellaceae; Histophilus; Histophilus somni; Haemophilus somnus 2336	0	8	0	1980
Hahella chejuensis KCTC 2396	Bacteria; Proteobacteria; Gammaproteobacteria; Oceanospirillales; Hahellaceae; Hahella; Hahella chejuensis; Hahella chejuensis KCTC 2396	10	63	6	6773
Halanaerobium hydrogeniformans	Bacteria; Firmicutes; Clostridia; Halanaerobiales; Halanaerobiaceae; Halanaerobium; Halanaerobium hydrogeniformans	1	9	1	2295
Halanaerobium praevalens DSM 2228	Bacteria; Firmicutes; Clostridia; Halanaerobiales; Halanaerobiaceae; Halanaerobium; Halanaerobium praevalens; Halanaerobium praevalens DSM 2228	1	13	1	2068
Haliangium ochraceum DSM 14365	Bacteria; Proteobacteria; delta/epsilon subdivisions; Deltaproteobacteria; Myxococcales; Nannocystineae; Kofleriaceae; Haliangium; Haliangium ochraceum; Haliangium ochraceum DSM 14365	28	200	0	6719
Haliscomenobacter hydrossis DSM 1100	Bacteria; Bacteroidetes/Chlorobi group; Bacteroidetes; Sphingobacteriia; Sphingobacteriales; Saprospiraceae; Haliscomenobacter; Haliscomenobacter hydrossis; Haliscomenobacter hydrossis DSM 1100	16	163	4	6752
Halobacillus halophilus DSM 2266	Bacteria; Firmicutes; Bacilli; Bacillales; Bacillaceae; Halobacillus; Halobacillus halophilus; Halobacillus halophilus DSM 2266	3	9	0	4126
Halomonas elongata DSM 2581	Bacteria; Proteobacteria; Gammaproteobacteria; Oceanospirillales; Halomonadaceae; Halomonas; Halomonas elongata; Halomonas elongata DSM 2581	0	18	0	3474
Halorhodospira halophila SL1	Bacteria; Proteobacteria; Gammaproteobacteria; Chromatiales; Ectothiorhodospiraceae; Halorhodospira; Halorhodospira halophila; Halorhodospira halophila SL1	1	22	2	2407
Halothermothrix orenii H 168	Bacteria; Firmicutes; Clostridia; Halanaerobiales; Halanaerobiaceae; Halothermothrix; Halothermothrix orenii; Halothermothrix orenii H 168	3	11	1	2342
Halothiobacillus neapolitanus c2	Bacteria; Proteobacteria; Gammaproteobacteria; Chromatiales; Halothiobacillaceae; Halothiobacillus; Halothiobacillus neapolitanus; Halothiobacillus neapolitanus c2	1	13	2	2357
Helicobacter acinonychis str. Sheeba	Bacteria; Proteobacteria; delta/epsilon subdivisions; Epsilonproteobacteria; Campylobacterales; Helicobacteraceae; Helicobacter; Helicobacter acinonychis; Helicobacter acinonychis str. Sheeba	0	6	0	1619
Helicobacter bizzozeronii CIII-1	Bacteria; Proteobacteria; delta/epsilon subdivisions; Epsilonproteobacteria; Campylobacterales; Helicobacteraceae; Helicobacter; Helicobacter bizzozeronii; Helicobacter bizzozeronii CIII-1	0	7	0	1971
Helicobacter cetorum MIT 00-7128	Bacteria; Proteobacteria; delta/epsilon subdivisions; Epsilonproteobacteria; Campylobacterales; Helicobacteraceae; Helicobacter; Helicobacter cetorum; Helicobacter cetorum MIT 00-7128	0	5	0	1731
Helicobacter cetorum MIT 99-5656	Bacteria; Proteobacteria; delta/epsilon subdivisions; Epsilonproteobacteria; Campylobacterales; Helicobacteraceae; Helicobacter; Helicobacter cetorum; Helicobacter cetorum MIT 99-5656	2	6	0	1689
Helicobacter cinaedi PAGU611	Bacteria; Proteobacteria; delta/epsilon subdivisions; Epsilonproteobacteria; Campylobacterales; Helicobacteraceae; Helicobacter; Helicobacter cinaedi; Helicobacter cinaedi PAGU611	1	7	3	2125
Helicobacter felis ATCC 49179	Bacteria; Proteobacteria; delta/epsilon subdivisions; Epsilonproteobacteria; Campylobacterales; Helicobacteraceae; Helicobacter; Helicobacter felis; Helicobacter felis ATCC 49179	0	6	0	1654
Helicobacter hepaticus ATCC 51449	Bacteria; Proteobacteria; delta/epsilon subdivisions; Epsilonproteobacteria; Campylobacterales; Helicobacteraceae; Helicobacter; Helicobacter hepaticus; Helicobacter hepaticus ATCC 51449	1	7	13	1876
Helicobacter mustelae 12198	Bacteria; Proteobacteria; delta/epsilon subdivisions; Epsilonproteobacteria; Campylobacterales; Helicobacteraceae; Helicobacter; Helicobacter mustelae; Helicobacter mustelae 12198	0	8	2	1398
Helicobacter pylori 2017	Bacteria; Proteobacteria; delta/epsilon subdivisions; Epsilonproteobacteria; Campylobacterales; Helicobacteraceae; Helicobacter; Helicobacter pylori; Helicobacter pylori 908; Helicobacter pylori 2017	0	5	0	1593
Helicobacter pylori 2018	Bacteria; Proteobacteria; delta/epsilon subdivisions; Epsilonproteobacteria; Campylobacterales; Helicobacteraceae; Helicobacter; Helicobacter pylori; Helicobacter pylori 908; Helicobacter pylori 2018	0	5	0	1603
Helicobacter pylori 26695	Bacteria; Proteobacteria; delta/epsilon subdivisions; Epsilonproteobacteria; Campylobacterales; Helicobacteraceae; Helicobacter; Helicobacter pylori; Helicobacter pylori 26695	0	4	0	1573
Helicobacter pylori 35A	Bacteria; Proteobacteria; delta/epsilon subdivisions; Epsilonproteobacteria; Campylobacterales; Helicobacteraceae; Helicobacter; Helicobacter pylori; Helicobacter pylori 35A	0	5	0	1470
Helicobacter pylori 51	Bacteria; Proteobacteria; delta/epsilon subdivisions; Epsilonproteobacteria; Campylobacterales; Helicobacteraceae; Helicobacter; Helicobacter pylori; Helicobacter pylori 51	0	3	0	1415
Helicobacter pylori 52	Bacteria; Proteobacteria; delta/epsilon subdivisions; Epsilonproteobacteria; Campylobacterales; Helicobacteraceae; Helicobacter; Helicobacter pylori; Helicobacter pylori 52	0	4	0
Helicobacter pylori 83	Bacteria; Proteobacteria; delta/epsilon subdivisions; Epsilonproteobacteria; Campylobacterales; Helicobacteraceae; Helicobacter; Helicobacter pylori; Helicobacter pylori 83	0	6	0	1609
Helicobacter pylori 908	Bacteria; Proteobacteria; delta/epsilon subdivisions; Epsilonproteobacteria; Campylobacterales; Helicobacteraceae; Helicobacter; Helicobacter pylori; Helicobacter pylori 908	0	5	0	1595
Helicobacter pylori B38	Bacteria; Proteobacteria; delta/epsilon subdivisions; Epsilonproteobacteria; Campylobacterales; Helicobacteraceae; Helicobacter; Helicobacter pylori; Helicobacter pylori B3	0	6	0	1382
Helicobacter pylori B8	Bacteria; Proteobacteria; delta/epsilon subdivisions; Epsilonproteobacteria; Campylobacterales; Helicobacteraceae; Helicobacter; Helicobacter pylori; Helicobacter pylori B8	0	5	0	1707
Helicobacter pylori Cuz20	Bacteria; Proteobacteria; delta/epsilon subdivisions; Epsilonproteobacteria; Campylobacterales; Helicobacteraceae; Helicobacter; Helicobacter pylori; Helicobacter pylori Cuz20	0	5	0	1564
Helicobacter pylori ELS37	Bacteria; Proteobacteria; delta/epsilon subdivisions; Epsilonproteobacteria; Campylobacterales; Helicobacteraceae; Helicobacter; Helicobacter pylori; Helicobacter pylori ELS37	0	7	0	1576
Helicobacter pylori F16	Bacteria; Proteobacteria; delta/epsilon subdivisions; Epsilonproteobacteria; Campylobacterales; Helicobacteraceae; Helicobacter; Helicobacter pylori; Helicobacter pylori F16	0	5	0	1500
Helicobacter pylori F30	Bacteria; Proteobacteria; delta/epsilon subdivisions; Epsilonproteobacteria; Campylobacterales; Helicobacteraceae; Helicobacter; Helicobacter pylori; Helicobacter pylori F30	0	5	0	1483
Helicobacter pylori F32	Bacteria; Proteobacteria; delta/epsilon subdivisions; Epsilonproteobacteria; Campylobacterales; Helicobacteraceae; Helicobacter; Helicobacter pylori; Helicobacter pylori F32	0	5	0	1490
Helicobacter pylori F57	Bacteria; Proteobacteria; delta/epsilon subdivisions; Epsilonproteobacteria; Campylobacterales; Helicobacteraceae; Helicobacter; Helicobacter pylori; Helicobacter pylori F57	0	4	0	1520
Helicobacter pylori G27	Bacteria; Proteobacteria; delta/epsilon subdivisions; Epsilonproteobacteria; Campylobacterales; Helicobacteraceae; Helicobacter; Helicobacter pylori; Helicobacter pylori G27	1	6	0	1504
Helicobacter pylori Gambia94/24	Bacteria; Proteobacteria; delta/epsilon subdivisions; Epsilonproteobacteria; Campylobacterales; Helicobacteraceae; Helicobacter; Helicobacter pylori; Helicobacter pylori Gambia94/24	0	6	0	1605
Helicobacter pylori HPAG1	Bacteria; Proteobacteria; delta/epsilon subdivisions; Epsilonproteobacteria; Campylobacterales; Helicobacteraceae; Helicobacter; Helicobacter pylori; Helicobacter pylori HPAG1	0	5	0	1539
Helicobacter pylori HUP-B14	Bacteria; Proteobacteria; delta/epsilon subdivisions; Epsilonproteobacteria; Campylobacterales; Helicobacteraceae; Helicobacter; Helicobacter pylori; Helicobacter pylori HUP-B14	0	5	0	1501
Helicobacter pylori India7	Bacteria; Proteobacteria; delta/epsilon subdivisions; Epsilonproteobacteria; Campylobacterales; Helicobacteraceae; Helicobacter; Helicobacter pylori; Helicobacter pylori India7	0	5	0	1600
Helicobacter pylori J99	Bacteria; Proteobacteria; delta/epsilon subdivisions; Epsilonproteobacteria; Campylobacterales; Helicobacteraceae; Helicobacter; Helicobacter pylori; Helicobacter pylori J99	0	6	0	1488
Helicobacter pylori Lithuania75	Bacteria; Proteobacteria; delta/epsilon subdivisions; Epsilonproteobacteria; Campylobacterales; Helicobacteraceae; Helicobacter; Helicobacter pylori; Helicobacter pylori Lithuania75	0	7	0	1565
Helicobacter pylori P12	Bacteria; Proteobacteria; delta/epsilon subdivisions; Epsilonproteobacteria; Campylobacterales; Helicobacteraceae; Helicobacter; Helicobacter pylori; Helicobacter pylori P12	0	5	0	1578
Helicobacter pylori PeCan18	Bacteria; Proteobacteria; delta/epsilon subdivisions; Epsilonproteobacteria; Campylobacterales; Helicobacteraceae; Helicobacter; Helicobacter pylori; Helicobacter pylori PeCan18	0	5	0	1495
Helicobacter pylori PeCan4	Bacteria; Proteobacteria; delta/epsilon subdivisions; Epsilonproteobacteria; Campylobacterales; Helicobacteraceae; Helicobacter; Helicobacter pylori; Helicobacter pylori PeCan4	0	6	0	1563
Helicobacter pylori Puno120	Bacteria; Proteobacteria; delta/epsilon subdivisions; Epsilonproteobacteria; Campylobacterales; Helicobacteraceae; Helicobacter; Helicobacter pylori; Helicobacter pylori Puno120	0	6	0	1540
Helicobacter pylori Puno135	Bacteria; Proteobacteria; delta/epsilon subdivisions; Epsilonproteobacteria; Campylobacterales; Helicobacteraceae; Helicobacter; Helicobacter pylori; Helicobacter pylori Puno135	0	4	0	1573
Helicobacter pylori Sat464	Bacteria; Proteobacteria; delta/epsilon subdivisions; Epsilonproteobacteria; Campylobacterales; Helicobacteraceae; Helicobacter; Helicobacter pylori; Helicobacter pylori Sat464	0	4	0	1508
Helicobacter pylori Shi112	Bacteria; Proteobacteria; delta/epsilon subdivisions; Epsilonproteobacteria; Campylobacterales; Helicobacteraceae; Helicobacter; Helicobacter pylori; Helicobacter pylori Shi112	0	5	0	1564
Helicobacter pylori Shi169	Bacteria; Proteobacteria; delta/epsilon subdivisions; Epsilonproteobacteria; Campylobacterales; Helicobacteraceae; Helicobacter; Helicobacter pylori; Helicobacter pylori Shi169	0	4	0	1525
Helicobacter pylori Shi417	Bacteria; Proteobacteria; delta/epsilon subdivisions; Epsilonproteobacteria; Campylobacterales; Helicobacteraceae; Helicobacter; Helicobacter pylori; Helicobacter pylori Shi417	0	5	0	1548
Helicobacter pylori Shi470	Bacteria; Proteobacteria; delta/epsilon subdivisions; Epsilonproteobacteria; Campylobacterales; Helicobacteraceae; Helicobacter; Helicobacter pylori; Helicobacter pylori Shi470	0	4	0	1568
Helicobacter pylori SJM180	Bacteria; Proteobacteria; delta/epsilon subdivisions; Epsilonproteobacteria; Campylobacterales; Helicobacteraceae; Helicobacter; Helicobacter pylori; Helicobacter pylori SJM180	0	4	0	1581
Helicobacter pylori SNT49	Bacteria; Proteobacteria; delta/epsilon subdivisions; Epsilonproteobacteria; Campylobacterales; Helicobacteraceae; Helicobacter; Helicobacter pylori; Helicobacter pylori SNT49	0	5	0	1519
Helicobacter pylori SouthAfrica7	Bacteria; Proteobacteria; delta/epsilon subdivisions; Epsilonproteobacteria; Campylobacterales; Helicobacteraceae; Helicobacter; Helicobacter pylori; Helicobacter pylori SouthAfrica7	0	6	0	1572
Helicobacter pylori v225d	Bacteria; Proteobacteria; delta/epsilon subdivisions; Epsilonproteobacteria; Campylobacterales; Helicobacteraceae; Helicobacter; Helicobacter pylori; Helicobacter pylori v225d	0	6	0	1550
Helicobacter pylori XZ274	Bacteria; Proteobacteria; delta/epsilon subdivisions; Epsilonproteobacteria; Campylobacterales; Helicobacteraceae; Helicobacter; Helicobacter pylori; Helicobacter pylori XZ274	0	3	0	1438
Heliobacterium modesticaldum Ice1	Bacteria; Firmicutes; Clostridia; Clostridiales; Heliobacteriaceae; Heliobacterium; Heliobacterium modesticaldum; Heliobacterium modesticaldum Ice1	3	8	0	2999
Herbaspirillum seropedicae SmR1	Bacteria; Proteobacteria; Betaproteobacteria; Burkholderiales; Oxalobacteraceae; Herbaspirillum; Herbaspirillum seropedicae; Herbaspirillum seropedicae SmR1	4	22	1	4735
Herminiimonas arsenicoxydans	Bacteria; Proteobacteria; Betaproteobacteria; Burkholderiales; Oxalobacteraceae; Herminiimonas; Herminiimonas arsenicoxydans	1	17	2	3295
Herpetosiphon aurantiacus DSM 785	Bacteria; Chloroflexi; Chloroflexi; Herpetosiphonales; Herpetosiphonaceae; Herpetosiphon; Herpetosiphon aurantiacus; Herpetosiphon aurantiacus DSM 785	12	125	2	5279
Hippea maritima DSM 10411	Bacteria; Proteobacteria; delta/epsilon subdivisions; Deltaproteobacteria; Desulfurellales; Desulfurellaceae; Hippea; Hippea maritima; Hippea maritima DSM 10411	0	16	1	1677
Hirschia baltica ATCC 49814	Bacteria; Proteobacteria; Alphaproteobacteria; Rhodobacterales; Hyphomonadaceae; Hirschia; Hirschia baltica; Hirschia baltica ATCC 49814	0	27	0	3187
Hydrogenobacter thermophilus TK-6	Bacteria; Aquificae; Aquificae; Aquificales; Aquificaceae; Hydrogenobacter; Hydrogenobacter thermophilus; Hydrogenobacter thermophilus TK-6	1	17	0	1893
Hydrogenobacter thermophilus TK-6	Bacteria; Aquificae; Aquificae; Aquificales; Aquificaceae; Hydrogenobacter; Hydrogenobacter thermophilus; Hydrogenobacter thermophilus TK-6	1	17	0	1869
Hydrogenobaculum sp. Y04AAS1	Bacteria; Aquificae; Aquificae; Aquificales; Aquificaceae; Hydrogenobaculum; Hydrogenobaculum sp. Y04AAS1	1	15	0	1629
Hyphomicrobium denitrificans ATCC 51888	Bacteria; Proteobacteria; Alphaproteobacteria; Rhizobiales; Hyphomicrobiaceae; Hyphomicrobium; Hyphomicrobium denitrificans; Hyphomicrobium denitrificans ATCC 51888	0	16	2	3512
Hyphomicrobium sp. MC1	Bacteria; Proteobacteria; Alphaproteobacteria; Rhizobiales; Hyphomicrobiaceae; Hyphomicrobium; Hyphomicrobium sp. MC1	3	27	0	4893
Hyphomonas neptunium ATCC 15444	Bacteria; Proteobacteria; Alphaproteobacteria; Rhodobacterales; Hyphomonadaceae; Hyphomonas; Hyphomonas neptunium; Hyphomonas neptunium ATCC 15444	1	28	0	3505
Idiomarina loihiensis L2TR	Bacteria; Proteobacteria; Gammaproteobacteria; Alteromonadales; Idiomarinaceae; Idiomarina; Idiomarina loihiensis; Idiomarina loihiensis L2TR	0	23	0	2628
Ignavibacterium album JCM 16511	Bacteria; Bacteroidetes/Chlorobi group; Ignavibacteria; Ignavibacteria; Ignavibacteriales; Ignavibacteriaceae; Ignavibacterium; Ignavibacterium album; Ignavibacterium album JCM 16511	5	43	0	3195
Ilyobacter polytropus DSM 2926	Bacteria; Fusobacteria; Fusobacteriia; Fusobacteriales; Fusobacteriaceae; Ilyobacter; Ilyobacter polytropus; Ilyobacter polytropus DSM 2926	0	11	2	2880
Intrasporangium calvum DSM 43043	Bacteria; Actinobacteria; Actinobacteria; Actinobacteridae; Actinomycetales; Micrococcineae; Intrasporangiaceae; Intrasporangium; Intrasporangium calvum; Intrasporangium calvum DSM 43043	2	12	1	3563
Isoptericola variabilis 225	Bacteria; Actinobacteria; Actinobacteria; Actinobacteridae; Actinomycetales; Micrococcineae; Promicromonosporaceae; Isoptericola; Isoptericola variabilis; Isoptericola variabilis 225	0	7	2	2881
Jannaschia sp. CCS1	Bacteria; Proteobacteria; Alphaproteobacteria; Rhodobacterales; Rhodobacteraceae; Jannaschia; Jannaschia sp. CCS1	1	26	1	4283
Janthinobacterium sp. Marseille	Bacteria; Proteobacteria; Betaproteobacteria; Burkholderiales; Oxalobacteraceae; Janthinobacterium; Janthinobacterium sp. Marseille	3	27	3	3697
Jonesia denitrificans DSM 20603	Bacteria; Actinobacteria; Actinobacteria; Actinobacteridae; Actinomycetales; Micrococcineae; Jonesiaceae; Jonesia; Jonesia denitrificans; Jonesia denitrificans DSM 20603	1	6	0	2511
Kangiella koreensis DSM 16069	Bacteria; Proteobacteria; Gammaproteobacteria; Oceanospirillales; Alcanivoracaceae; Kangiella; Kangiella koreensis; Kangiella koreensis DSM 16069	2	26	0	2632
Ketogulonicigenium vulgare Y25	Bacteria; Proteobacteria; Alphaproteobacteria; Rhodobacterales; Rhodobacteraceae; Ketogulonicigenium; Ketogulonicigenium vulgare; Ketogulonicigenium vulgare Y25	2	8	1	3213
Ketogulonigenium vulgarum WSH-001	Bacteria; Proteobacteria; Alphaproteobacteria; Rhodobacterales; Rhodobacteraceae; Ketogulonicigenium; Ketogulonicigenium vulgare; Ketogulonigenium vulgarum WSH-001	2	7	1	3054
Kineococcus radiotolerans SRS30216	Bacteria; Actinobacteria; Actinobacteria; Actinobacteridae; Actinomycetales; Kineosporiineae; Kineosporiaceae; Kineococcus; Kineococcus radiotolerans; Kineococcus radiotolerans SRS30216	2	13	2	4681
Kitasatospora setae KM-6054	Bacteria; Actinobacteria; Actinobacteria; Actinobacteridae; Actinomycetales; Streptomycineae; Streptomycetaceae; Kitasatospora; Kitasatospora setae; Kitasatospora setae KM-6054	17	71	3	7566
Klebsiella oxytoca E718	Bacteria; Proteobacteria; Gammaproteobacteria; Enterobacteriales; Enterobacteriaceae; Klebsiella; Klebsiella oxytoca; Klebsiella oxytoca E718	1	16	0	6023
Klebsiella oxytoca KCTC 1686	Bacteria; Proteobacteria; Gammaproteobacteria; Enterobacteriales; Enterobacteriaceae; Klebsiella; Klebsiella oxytoca; Klebsiella oxytoca KCTC 1686	1	15	0	5488
Klebsiella pneumoniae 342	Bacteria; Proteobacteria; Gammaproteobacteria; Enterobacteriales; Enterobacteriaceae; Klebsiella; Klebsiella pneumoniae; Klebsiella pneumoniae 342	1	13	1	5768
Klebsiella pneumoniae KCTC 2242	Bacteria; Proteobacteria; Gammaproteobacteria; Enterobacteriales; Enterobacteriaceae; Klebsiella; Klebsiella pneumoniae; Klebsiella pneumoniae KCTC 2242	1	16	1	5152
Klebsiella pneumoniae NTUH-K2044	Bacteria; Proteobacteria; Gammaproteobacteria; Enterobacteriales; Enterobacteriaceae; Klebsiella; Klebsiella pneumoniae; Klebsiella pneumoniae subsp. pneumoniae; Klebsiella pneumoniae subsp. pneumoniae NTUH-K2044	1	15	1	5262
Klebsiella pneumoniae subsp. pneumoniae HS11286	Bacteria; Proteobacteria; Gammaproteobacteria; Enterobacteriales; Enterobacteriaceae; Klebsiella; Klebsiella pneumoniae; Klebsiella pneumoniae subsp. pneumoniae; Klebsiella pneumoniae subsp. pneumoniae HS11286	1	14	1	5779
Klebsiella pneumoniae subsp. pneumoniae MGH 78578	Bacteria; Proteobacteria; Gammaproteobacteria; Enterobacteriales; Enterobacteriaceae; Klebsiella; Klebsiella pneumoniae; Klebsiella pneumoniae subsp. pneumoniae; Klebsiella pneumoniae subsp. pneumoniae MGH 78578	2	14	1	5185
Klebsiella variicola At-22	Bacteria; Proteobacteria; Gammaproteobacteria; Enterobacteriales; Enterobacteriaceae; Klebsiella; Klebsiella variicola; Klebsiella variicola At-22	2	13	1	5057
Kocuria rhizophila DC2201	Bacteria; Actinobacteria; Actinobacteria; Actinobacteridae; Actinomycetales; Micrococcineae; Micrococcaceae; Kocuria; Kocuria rhizophila; Kocuria rhizophila DC2201	2	3	1	2357
Kosmotoga olearia TBF 19.5.1	Bacteria; Thermotogae; Thermotogae; Thermotogales; Thermotogaceae; Kosmotoga; Kosmotoga olearia; Kosmotoga olearia TBF 19.5.1	3	12	0	2118
Kribbella flavida DSM 17836	Bacteria; Actinobacteria; Actinobacteria; Actinobacteridae; Actinomycetales; Propionibacterineae; Nocardioidaceae; Kribbella; Kribbella flavida; Kribbella flavida DSM 17836	5	57	3	6943
Krokinobacter sp. 4H-3-7-5	Bacteria; Bacteroidetes/Chlorobi group; Bacteroidetes; Flavobacteriia; Flavobacteriales; Flavobacteriaceae; Krokinobacter; Krokinobacter sp. 4H-3-7-5	1	43	3	2978
Kyrpidia tusciae DSM 2912	Bacteria; Firmicutes; Bacilli; Bacillales; Alicyclobacillaceae; Kyrpidia; Kyrpidia tusciae; Kyrpidia tusciae DSM 2912	2	12	0	3150
Kytococcus sedentarius DSM 20547	Bacteria; Actinobacteria; Actinobacteria; Actinobacteridae; Actinomycetales; Micrococcineae; Dermacoccaceae; Kytococcus; Kytococcus sedentarius; Kytococcus sedentarius DSM 20547	1	6	1	2554
Lacinutrix sp. 5H-3-7-4	Bacteria; Bacteroidetes/Chlorobi group; Bacteroidetes; Flavobacteriia; Flavobacteriales; Flavobacteriaceae; Lacinutrix; Lacinutrix sp. 5H-3-7-4	2	45	3	2967
Lactobacillus acidophilus 30SC	Bacteria; Firmicutes; Bacilli; Lactobacillales; Lactobacillaceae; Lactobacillus; Lactobacillus acidophilus; Lactobacillus acidophilus 30SC	0	4	0	2059
Lactobacillus acidophilus NCFM	Bacteria; Firmicutes; Bacilli; Lactobacillales; Lactobacillaceae; Lactobacillus; Lactobacillus acidophilus; Lactobacillus acidophilus NCFM	2	2	0	1864
Lactobacillus amylovorus GRL 1112	Bacteria; Firmicutes; Bacilli; Lactobacillales; Lactobacillaceae; Lactobacillus; Lactobacillus amylovorus; Lactobacillus amylovorus GRL 1112	1	3	0	2121
Lactobacillus amylovorus GRL1118	Bacteria; Firmicutes; Bacilli; Lactobacillales; Lactobacillaceae; Lactobacillus; Lactobacillus amylovorus; Lactobacillus amylovorus GRL1118	0	3	0	1920
Lactobacillus brevis ATCC 367	Bacteria; Firmicutes; Bacilli; Lactobacillales; Lactobacillaceae; Lactobacillus; Lactobacillus brevis; Lactobacillus brevis ATCC 367	1	5	0	2218
Lactobacillus buchneri NRRL B-30929	Bacteria; Firmicutes; Bacilli; Lactobacillales; Lactobacillaceae; Lactobacillus; Lactobacillus buchneri; Lactobacillus buchneri NRRL B-30929	1	5	0	2392
Lactobacillus casei ATCC 334	Bacteria; Firmicutes; Bacilli; Lactobacillales; Lactobacillaceae; Lactobacillus; Lactobacillus casei group; Lactobacillus casei; Lactobacillus casei ATCC 334	3	6	0	2768
Lactobacillus casei BD-II	Bacteria; Firmicutes; Bacilli; Lactobacillales; Lactobacillaceae; Lactobacillus; Lactobacillus casei group; Lactobacillus casei; Lactobacillus casei BD-II	5	7	0	3204
Lactobacillus casei BL23	Bacteria; Firmicutes; Bacilli; Lactobacillales; Lactobacillaceae; Lactobacillus; Lactobacillus casei group; Lactobacillus casei; Lactobacillus casei BL23	5	7	0	3015
Lactobacillus casei LC2W	Bacteria; Firmicutes; Bacilli; Lactobacillales; Lactobacillaceae; Lactobacillus; Lactobacillus casei group; Lactobacillus casei; Lactobacillus casei LC2W	4	7	0	3164
Lactobacillus casei str. Zhang	Bacteria; Firmicutes; Bacilli; Lactobacillales; Lactobacillaceae; Lactobacillus; Lactobacillus casei group; Lactobacillus casei; Lactobacillus casei str. Zhang	2	5	0	2848
Lactobacillus crispatus ST1	Bacteria; Firmicutes; Bacilli; Lactobacillales; Lactobacillaceae; Lactobacillus; Lactobacillus crispatus; Lactobacillus crispatus ST1	2	3	0	2022
Lactobacillus delbrueckii subsp. bulgaricus 2038	Bacteria; Firmicutes; Bacilli; Lactobacillales; Lactobacillaceae; Lactobacillus; Lactobacillus delbrueckii; Lactobacillus delbrueckii subsp. bulgaricus; Lactobacillus delbrueckii subsp. bulgaricus 2038	1	2	0	1792
Lactobacillus delbrueckii subsp. bulgaricus ATCC 11842	Bacteria; Firmicutes; Bacilli; Lactobacillales; Lactobacillaceae; Lactobacillus; Lactobacillus delbrueckii; Lactobacillus delbrueckii subsp. bulgaricus; Lactobacillus delbrueckii subsp. bulgaricus ATCC 11842	2	2	0	1529
Lactobacillus delbrueckii subsp. bulgaricus ATCC BAA-365	Bacteria; Firmicutes; Bacilli; Lactobacillales; Lactobacillaceae; Lactobacillus; Lactobacillus delbrueckii; Lactobacillus delbrueckii subsp. bulgaricus; Lactobacillus delbrueckii subsp. bulgaricus ATCC BAA-365	3	2	0	1715
Lactobacillus delbrueckii subsp. bulgaricus ND02	Bacteria; Firmicutes; Bacilli; Lactobacillales; Lactobacillaceae; Lactobacillus; Lactobacillus delbrueckii; Lactobacillus delbrueckii subsp. bulgaricus; Lactobacillus delbrueckii subsp. bulgaricus ND02	1	2	0	2018
Lactobacillus fermentum CECT 5716	Bacteria; Firmicutes; Bacilli; Lactobacillales; Lactobacillaceae; Lactobacillus; Lactobacillus fermentum; Lactobacillus fermentum CECT 5716	0	4	0	1051
Lactobacillus fermentum IFO 3956	Bacteria; Firmicutes; Bacilli; Lactobacillales; Lactobacillaceae; Lactobacillus; Lactobacillus fermentum; Lactobacillus fermentum IFO 3956	0	4	0	1843
Lactobacillus gasseri ATCC 33323	Bacteria; Firmicutes; Bacilli; Lactobacillales; Lactobacillaceae; Lactobacillus; Lactobacillus gasseri; Lactobacillus gasseri ATCC 33323	1	2	0	1755
Lactobacillus helveticus DPC 4571	Bacteria; Firmicutes; Bacilli; Lactobacillales; Lactobacillaceae; Lactobacillus; Lactobacillus helveticus; Lactobacillus helveticus DPC 4571	0	2	0	1610
Lactobacillus helveticus H10	Bacteria; Firmicutes; Bacilli; Lactobacillales; Lactobacillaceae; Lactobacillus; Lactobacillus helveticus; Lactobacillus helveticus H10	0	3	0	1978
Lactobacillus johnsonii DPC 6026	Bacteria; Firmicutes; Bacilli; Lactobacillales; Lactobacillaceae; Lactobacillus; Lactobacillus johnsonii; Lactobacillus johnsonii DPC 6026	1	5	0	1772
Lactobacillus johnsonii FI9785	Bacteria; Firmicutes; Bacilli; Lactobacillales; Lactobacillaceae; Lactobacillus; Lactobacillus johnsonii; Lactobacillus johnsonii FI9785	1	4	0	1735
Lactobacillus johnsonii NCC 533	Bacteria; Firmicutes; Bacilli; Lactobacillales; Lactobacillaceae; Lactobacillus; Lactobacillus johnsonii; Lactobacillus johnsonii NCC 533	1	4	0	1821
Lactobacillus kefiranofaciens ZW3	Bacteria; Firmicutes; Bacilli; Lactobacillales; Lactobacillaceae; Lactobacillus; Lactobacillus kefiranofaciens; Lactobacillus kefiranofaciens ZW3	0	3	0	2162
Lactobacillus plantarum JDM1	Bacteria; Firmicutes; Bacilli; Lactobacillales; Lactobacillaceae; Lactobacillus; Lactobacillus plantarum; Lactobacillus plantarum JDM1	0	4	1	2948
Lactobacillus plantarum subsp. plantarum ST-III	Bacteria; Firmicutes; Bacilli; Lactobacillales; Lactobacillaceae; Lactobacillus; Lactobacillus plantarum; Lactobacillus plantarum subsp. plantarum; Lactobacillus plantarum subsp. plantarum ST-III	0	3	0	3038
Lactobacillus plantarum WCFS1	Bacteria; Firmicutes; Bacilli; Lactobacillales; Lactobacillaceae; Lactobacillus; Lactobacillus plantarum; Lactobacillus plantarum WCFS1	2	3	1	3158
Lactobacillus reuteri DSM 20016	Bacteria; Firmicutes; Bacilli; Lactobacillales; Lactobacillaceae; Lactobacillus; Lactobacillus reuteri; Lactobacillus reuteri DSM 20016	0	3	0	1900
Lactobacillus reuteri JCM 1112	Bacteria; Firmicutes; Bacilli; Lactobacillales; Lactobacillaceae; Lactobacillus; Lactobacillus reuteri; Lactobacillus reuteri JCM 1112	0	3	0	1820
Lactobacillus reuteri SD2112	Bacteria; Firmicutes; Bacilli; Lactobacillales; Lactobacillaceae; Lactobacillus; Lactobacillus reuteri; Lactobacillus reuteri SD2112	0	3	0	2300
Lactobacillus rhamnosus ATCC 8530	Bacteria; Firmicutes; Bacilli; Lactobacillales; Lactobacillaceae; Lactobacillus; Lactobacillus rhamnosus; Lactobacillus rhamnosus ATCC 8530	1	4	0	2886
Lactobacillus rhamnosus GG	Bacteria; Firmicutes; Bacilli; Lactobacillales; Lactobacillaceae; Lactobacillus; Lactobacillus rhamnosus; Lactobacillus rhamnosus GG	2	3	0	2913
Lactobacillus rhamnosus GG	Bacteria; Firmicutes; Bacilli; Lactobacillales; Lactobacillaceae; Lactobacillus; Lactobacillus rhamnosus; Lactobacillus rhamnosus GG	2	3	0	2834
Lactobacillus rhamnosus Lc 705	Bacteria; Firmicutes; Bacilli; Lactobacillales; Lactobacillaceae; Lactobacillus; Lactobacillus rhamnosus; Lactobacillus rhamnosus Lc 705	1	4	0	2957
Lactobacillus ruminis ATCC 27782	Bacteria; Firmicutes; Bacilli; Lactobacillales; Lactobacillaceae; Lactobacillus; Lactobacillus ruminis; Lactobacillus ruminis ATCC 27782	0	3	0	1862
Lactobacillus sakei subsp. sakei 23K	Bacteria; Firmicutes; Bacilli; Lactobacillales; Lactobacillaceae; Lactobacillus; Lactobacillus sakei; Lactobacillus sakei subsp. sakei; Lactobacillus sakei subsp. sakei 23K	3	5	0	1879
Lactobacillus salivarius CECT 5713	Bacteria; Firmicutes; Bacilli; Lactobacillales; Lactobacillaceae; Lactobacillus; Lactobacillus salivarius; Lactobacillus salivarius CECT 5713	1	3	0	1552
Lactobacillus salivarius UCC118	Bacteria; Firmicutes; Bacilli; Lactobacillales; Lactobacillaceae; Lactobacillus; Lactobacillus salivarius; Lactobacillus salivarius UCC118	1	3	0	2013
Lactobacillus sanfranciscensis TMW 1.1304	Bacteria; Firmicutes; Bacilli; Lactobacillales; Lactobacillaceae; Lactobacillus; Lactobacillus sanfranciscensis; Lactobacillus sanfranciscensis TMW 1.1304	0	2	0	1284
Lactococcus garvieae ATCC 49156	Bacteria; Firmicutes; Bacilli; Lactobacillales; Streptococcaceae; Lactococcus; Lactococcus garvieae; Lactococcus garvieae ATCC 49156	2	1	1	1947
Lactococcus garvieae Lg2	Bacteria; Firmicutes; Bacilli; Lactobacillales; Streptococcaceae; Lactococcus; Lactococcus garvieae; Lactococcus garvieae Lg2	2	1	1	1968
Lactococcus lactis subsp. cremoris A76	Bacteria; Firmicutes; Bacilli; Lactobacillales; Streptococcaceae; Lactococcus; Lactococcus lactis; Lactococcus lactis subsp. cremoris; Lactococcus lactis subsp. cremoris A76	3	2	0	2769
Lactococcus lactis subsp. cremoris MG1363	Bacteria; Firmicutes; Bacilli; Lactobacillales; Streptococcaceae; Lactococcus; Lactococcus lactis; Lactococcus lactis subsp. cremoris; Lactococcus lactis subsp. cremoris MG1363	1	2	0	2434
Lactococcus lactis subsp. cremoris NZ9000	Bacteria; Firmicutes; Bacilli; Lactobacillales; Streptococcaceae; Lactococcus; Lactococcus lactis; Lactococcus lactis subsp. cremoris; Lactococcus lactis subsp. cremoris NZ9000	1	2	0	2510
Lactococcus lactis subsp. cremoris SK11	Bacteria; Firmicutes; Bacilli; Lactobacillales; Streptococcaceae; Lactococcus; Lactococcus lactis; Lactococcus lactis subsp. cremoris; Lactococcus lactis subsp. cremoris SK11	2	2	0	2504
Lactococcus lactis subsp. lactis CV56	Bacteria; Firmicutes; Bacilli; Lactobacillales; Streptococcaceae; Lactococcus; Lactococcus lactis; Lactococcus lactis subsp. lactis; Lactococcus lactis subsp. lactis CV56	3	1	0	2408
Lactococcus lactis subsp. lactis Il1403	Bacteria; Firmicutes; Bacilli; Lactobacillales; Streptococcaceae; Lactococcus; Lactococcus lactis; Lactococcus lactis subsp. lactis; Lactococcus lactis subsp. lactis Il1403	2	1	0	2321
Lactococcus lactis subsp. lactis KF147	Bacteria; Firmicutes; Bacilli; Lactobacillales; Streptococcaceae; Lactococcus; Lactococcus lactis; Lactococcus lactis subsp. lactis; Lactococcus lactis subsp. lactis KF147	1	1	0	2473
Laribacter hongkongensis HLHK9	Bacteria; Proteobacteria; Betaproteobacteria; Neisseriales; Neisseriaceae; Laribacter; Laribacter hongkongensis; Laribacter hongkongensis HLHK9	0	10	0	3235
Lawsonia intracellularis PHE/MN1-00	Bacteria; Proteobacteria; delta/epsilon subdivisions; Deltaproteobacteria; Desulfovibrionales; Desulfovibrionaceae; Lawsonia; Lawsonia intracellularis; Lawsonia intracellularis PHE/MN1-00	1	23	2	1340
Leadbetterella byssophila DSM 17132	Bacteria; Bacteroidetes/Chlorobi group; Bacteroidetes; Cytophagia; Cytophagales; Cytophagaceae; Leadbetterella; Leadbetterella byssophila; Leadbetterella byssophila DSM 17132	5	74	1	3465
Legionella longbeachae NSW150	Bacteria; Proteobacteria; Gammaproteobacteria; Legionellales; Legionellaceae; Legionella; Legionella longbeachae; Legionella longbeachae NSW150	2	15	26	3470
Legionella pneumophila 2300/99 Alcoy	Bacteria; Proteobacteria; Gammaproteobacteria; Legionellales; Legionellaceae; Legionella; Legionella pneumophila; Legionella pneumophila serogroup 1; Legionella pneumophila 2300/99 Alcoy	0	12	17	3190
Legionella pneumophila str. Corby	Bacteria; Proteobacteria; Gammaproteobacteria; Legionellales; Legionellaceae; Legionella; Legionella pneumophila; Legionella pneumophila str. Corby	0	12	17	3204
Legionella pneumophila str. Lens	Bacteria; Proteobacteria; Gammaproteobacteria; Legionellales; Legionellaceae; Legionella; Legionella pneumophila; Legionella pneumophila str. Lens	0	11	19	2934
Legionella pneumophila str. Paris	Bacteria; Proteobacteria; Gammaproteobacteria; Legionellales; Legionellaceae; Legionella; Legionella pneumophila; Legionella pneumophila str. Paris	1	14	21	3166
Legionella pneumophila subsp. pneumophila	Bacteria; Proteobacteria; Gammaproteobacteria; Legionellales; Legionellaceae; Legionella; Legionella pneumophila; Legionella pneumophila subsp. pneumophila	1	11	19
Legionella pneumophila subsp. pneumophila	Bacteria; Proteobacteria; Gammaproteobacteria; Legionellales; Legionellaceae; Legionella; Legionella pneumophila; Legionella pneumophila subsp. pneumophila	1	12	17
Legionella pneumophila subsp. pneumophila ATCC 43290	Bacteria; Proteobacteria; Gammaproteobacteria; Legionellales; Legionellaceae; Legionella; Legionella pneumophila; Legionella pneumophila serogroup 12; Legionella pneumophila subsp. pneumophila ATCC 43290	1	13	15	2926
Legionella pneumophila subsp. pneumophila str. Philadelphia 1	Bacteria; Proteobacteria; Gammaproteobacteria; Legionellales; Legionellaceae; Legionella; Legionella pneumophila; Legionella pneumophila subsp. pneumophila; Legionella pneumophila subsp. pneumophila str. Philadelphia 1	0	13	15	2943
Leifsonia xyli subsp. xyli str. CTCB07	Bacteria; Actinobacteria; Actinobacteria; Actinobacteridae; Actinomycetales; Micrococcineae; Microbacteriaceae; Leifsonia; Leifsonia xyli; Leifsonia xyli subsp. xyli; Leifsonia xyli subsp. xyli str. CTCB07	1	6	2	2030
Leptospira biflexa serovar Patoc strain 'Patoc 1 (Ames)'	Bacteria; Spirochaetes; Spirochaetia; Spirochaetales; Leptospiraceae; Leptospira; Leptospira biflexa; Leptospira biflexa serovar Patoc; Leptospira biflexa serovar Patoc strain 'Patoc 1 (Ames)'	7	51	15	3600
Leptospira biflexa serovar Patoc strain 'Patoc 1 (Paris)'	Bacteria; Spirochaetes; Spirochaetia; Spirochaetales; Leptospiraceae; Leptospira; Leptospira biflexa; Leptospira biflexa serovar Patoc; Leptospira biflexa serovar Patoc strain 'Patoc 1 (Paris)'	7	52	15	3726
Leptospira borgpetersenii serovar Hardjo-bovis str. JB197	Bacteria; Spirochaetes; Spirochaetia; Spirochaetales; Leptospiraceae; Leptospira; Leptospira borgpetersenii; Leptospira borgpetersenii serovar Hardjo-bovis; Leptospira borgpetersenii serovar Hardjo-bovis str. JB197	7	49	8	2880
Leptospira borgpetersenii serovar Hardjo-bovis str. L550	Bacteria; Spirochaetes; Spirochaetia; Spirochaetales; Leptospiraceae; Leptospira; Leptospira borgpetersenii; Leptospira borgpetersenii serovar Hardjo-bovis; Leptospira borgpetersenii serovar Hardjo-bovis str. L550	7	50	5	2945
Leptospira interrogans serovar Copenhageni str. Fiocruz L1-130	Bacteria; Spirochaetes; Spirochaetia; Spirochaetales; Leptospiraceae; Leptospira; Leptospira interrogans; Leptospira interrogans serovar Copenhageni; Leptospira interrogans serovar Copenhageni str. Fiocruz L1-130	9	54	13	3667
Leptospira interrogans serovar Lai str. 56601	Bacteria; Spirochaetes; Spirochaetia; Spirochaetales; Leptospiraceae; Leptospira; Leptospira interrogans; Leptospira interrogans serovar Lai; Leptospira interrogans serovar Lai str. 56601	9	55	15	3702
Leptospira interrogans serovar Lai str. IPAV	Bacteria; Spirochaetes; Spirochaetia; Spirochaetales; Leptospiraceae; Leptospira; Leptospira interrogans; Leptospira interrogans serovar Lai; Leptospira interrogans serovar Lai str. IPAV	9	54	15	3711
Leptospirillum ferrooxidans C2-3	Bacteria; Nitrospirae; Nitrospira; Nitrospirales; Nitrospiraceae; Leptospirillum; Leptospirillum sp. Group I; Leptospirillum ferrooxidans; Leptospirillum ferrooxidans C2-3	2	34	0	2417
Leptothrix cholodnii SP-6	Bacteria; Proteobacteria; Betaproteobacteria; Burkholderiales; unclassified Burkholderiales; Burkholderiales Genera incertae sedis; Leptothrix; Leptothrix cholodnii; Leptothrix cholodnii SP-6	3	38	1	4363
Leptotrichia buccalis C-1013-b	Bacteria; Fusobacteria; Fusobacteriia; Fusobacteriales; Leptotrichiaceae; Leptotrichia; Leptotrichia buccalis; Leptotrichia buccalis C-1013-b	3	19	2	2220
Leuconostoc citreum KM20	Bacteria; Firmicutes; Bacilli; Lactobacillales; Leuconostocaceae; Leuconostoc; Leuconostoc citreum; Leuconostoc citreum KM20	0	2	0	1820
Leuconostoc gasicomitatum LMG 18811	Bacteria; Firmicutes; Bacilli; Lactobacillales; Leuconostocaceae; Leuconostoc; Leuconostoc gasicomitatum; Leuconostoc gasicomitatum LMG 18811	0	1	0	1912
Leuconostoc kimchii IMSNU 11154	Bacteria; Firmicutes; Bacilli; Lactobacillales; Leuconostocaceae; Leuconostoc; Leuconostoc kimchii; Leuconostoc kimchii IMSNU 11154	1	2	0	2129
Leuconostoc mesenteroides subsp. mesenteroides ATCC 8293	Bacteria; Firmicutes; Bacilli; Lactobacillales; Leuconostocaceae; Leuconostoc; Leuconostoc mesenteroides; Leuconostoc mesenteroides subsp. mesenteroides; Leuconostoc mesenteroides subsp. mesenteroides ATCC 8293	0	2	0	2005
Leuconostoc mesenteroides subsp. mesenteroides J18	Bacteria; Firmicutes; Bacilli; Lactobacillales; Leuconostocaceae; Leuconostoc; Leuconostoc mesenteroides; Leuconostoc mesenteroides subsp. mesenteroides; Leuconostoc mesenteroides subsp. mesenteroides J18	0	1	0	1937
Leuconostoc sp. C2	Bacteria; Firmicutes; Bacilli; Lactobacillales; Leuconostocaceae; Leuconostoc; Leuconostoc sp. C2	1	2	0	1855
Listeria innocua Clip11262	Bacteria; Firmicutes; Bacilli; Bacillales; Listeriaceae; Listeria; Listeria innocua; Listeria innocua Clip11262	5	8	0	3043
Listeria ivanovii subsp. ivanovii PAM 55	Bacteria; Firmicutes; Bacilli; Bacillales; Listeriaceae; Listeria; Listeria ivanovii; Listeria ivanovii subsp. ivanovii; Listeria ivanovii subsp. ivanovii PAM 55	3	11	0
Listeria monocytogenes 07PF0776	Bacteria; Firmicutes; Bacilli; Bacillales; Listeriaceae; Listeria; Listeria monocytogenes; Listeria monocytogenes 07PF0776	5	9	0	2797
Listeria monocytogenes 08-5578	Bacteria; Firmicutes; Bacilli; Bacillales; Listeriaceae; Listeria; Listeria monocytogenes; Listeria monocytogenes 08-5578	4	10	0	3088
Listeria monocytogenes 08-5923	Bacteria; Firmicutes; Bacilli; Bacillales; Listeriaceae; Listeria; Listeria monocytogenes; Listeria monocytogenes 08-5923	4	10	0	2966
Listeria monocytogenes 10403S	Bacteria; Firmicutes; Bacilli; Bacillales; Listeriaceae; Listeria; Listeria monocytogenes; Listeria monocytogenes 10403S	4	9	0	2814
Listeria monocytogenes EGD-e	Bacteria; Firmicutes; Bacilli; Bacillales; Listeriaceae; Listeria; Listeria monocytogenes; Listeria monocytogenes EGD-e	4	10	0	2846
Listeria monocytogenes Finland 1998	Bacteria; Firmicutes; Bacilli; Bacillales; Listeriaceae; Listeria; Listeria monocytogenes; Listeria monocytogenes Finland 1998	4	9	0	2762
Listeria monocytogenes FSL R2-561	Bacteria; Firmicutes; Bacilli; Bacillales; Listeriaceae; Listeria; Listeria monocytogenes; Listeria monocytogenes FSL R2-561	4	10	0	2910
Listeria monocytogenes HCC23	Bacteria; Firmicutes; Bacilli; Bacillales; Listeriaceae; Listeria; Listeria monocytogenes; Listeria monocytogenes HCC23	5	9	1	2974
Listeria monocytogenes J0161	Bacteria; Firmicutes; Bacilli; Bacillales; Listeriaceae; Listeria; Listeria monocytogenes; Listeria monocytogenes J0161	4	9	0	2955
Listeria monocytogenes L99	Bacteria; Firmicutes; Bacilli; Bacillales; Listeriaceae; Listeria; Listeria monocytogenes; Listeria monocytogenes L99	5	9	1	2925
Listeria monocytogenes M7	Bacteria; Firmicutes; Bacilli; Bacillales; Listeriaceae; Listeria; Listeria monocytogenes; Listeria monocytogenes M7	5	9	1	2977
Listeria monocytogenes serotype 4b str. CLIP 80459	Bacteria; Firmicutes; Bacilli; Bacillales; Listeriaceae; Listeria; Listeria monocytogenes; Listeria monocytogenes serotype 4b str. CLIP 80459	5	9	0	2766
Listeria monocytogenes serotype 4b str. F2365	Bacteria; Firmicutes; Bacilli; Bacillales; Listeriaceae; Listeria; Listeria monocytogenes; Listeria monocytogenes serotype 4b str. F2365	4	9	0	2821
Listeria seeligeri serovar 1/2b str. SLCC3954	Bacteria; Firmicutes; Bacilli; Bacillales; Listeriaceae; Listeria; Listeria seeligeri; Listeria seeligeri serovar 1/2b str. SLCC3954	3	9	0	2710
Listeria welshimeri serovar 6b str. SLCC5334	Bacteria; Firmicutes; Bacilli; Bacillales; Listeriaceae; Listeria; Listeria welshimeri; Listeria welshimeri serovar 6b str. SLCC5334	7	8	0	2774
Lysinibacillus sphaericus C3-41	Bacteria; Firmicutes; Bacilli; Bacillales; Bacillaceae; Lysinibacillus; Lysinibacillus sphaericus; Lysinibacillus sphaericus C3-41	7	20	4	4771
Macrococcus caseolyticus JCSC5402	Bacteria; Firmicutes; Bacilli; Bacillales; Staphylococcaceae; Macrococcus; Macrococcus caseolyticus; Macrococcus caseolyticus JCSC5402	3	6	0	2053
Magnetococcus marinus MC-1	Bacteria; Proteobacteria; Alphaproteobacteria; Magnetococcales; Magnetococcaceae; Magnetococcus; Magnetococcus marinus; Magnetococcus marinus MC-1	7	58	5	3716
Magnetospirillum magneticum AMB-1	Bacteria; Proteobacteria; Alphaproteobacteria; Rhodospirillales; Rhodospirillaceae; Magnetospirillum; Magnetospirillum magneticum; Magnetospirillum magneticum AMB-1	4	48	2	4561
Mahella australiensis 50-1 BON	Bacteria; Firmicutes; Clostridia; Thermoanaerobacterales; Thermoanaerobacterales Family IV. Incertae Sedis; Mahella; Mahella australiensis; Mahella australiensis 50-1 BON	2	10	0	2870
Maribacter sp. HTCC2170	Bacteria; Bacteroidetes/Chlorobi group; Bacteroidetes; Flavobacteriia; Flavobacteriales; Flavobacteriaceae; Maribacter; Maribacter sp. HTCC2170	7	54	2	3411
Maricaulis maris MCS10	Bacteria; Proteobacteria; Alphaproteobacteria; Rhodobacterales; Hyphomonadaceae; Maricaulis; Maricaulis maris; Maricaulis maris MCS10	2	34	2	3063
Marinithermus hydrothermalis DSM 14884	Bacteria; Deinococcus-Thermus; Deinococci; Thermales; Thermaceae; Marinithermus; Marinithermus hydrothermalis; Marinithermus hydrothermalis DSM 14884	1	19	1	2205
Marinitoga piezophila KA3	Bacteria; Thermotogae; Thermotogae; Thermotogales; Thermotogaceae; Marinitoga; Marinitoga piezophila; Marinitoga piezophila KA3	4	13	1	2046
Marinobacter adhaerens HP15	Bacteria; Proteobacteria; Gammaproteobacteria; Alteromonadales; Alteromonadaceae; Marinobacter; Marinobacter adhaerens; Marinobacter adhaerens HP15	0	37	3	4410
Marinobacter aquaeolei VT8	Bacteria; Proteobacteria; Gammaproteobacteria; Alteromonadales; Alteromonadaceae; Marinobacter; Marinobacter hydrocarbonoclasticus; Marinobacter aquaeolei VT8	0	36	3	4272
Marinobacter hydrocarbonoclasticus ATCC 49840	Bacteria; Proteobacteria; Gammaproteobacteria; Alteromonadales; Alteromonadaceae; Marinobacter; Marinobacter hydrocarbonoclasticus; Marinobacter hydrocarbonoclasticus ATCC 49840	0	35	2	3786
Marinomonas mediterranea MMB-1	Bacteria; Proteobacteria; Gammaproteobacteria; Oceanospirillales; Oceanospirillaceae; Marinomonas; Marinomonas mediterranea; Marinomonas mediterranea MMB-1	2	19	1	4121
Marinomonas posidonica IVIA-Po-181	Bacteria; Proteobacteria; Gammaproteobacteria; Oceanospirillales; Oceanospirillaceae; Marinomonas; Marinomonas posidonica; Marinomonas posidonica IVIA-Po-181	2	18	1	3491
Marinomonas sp. MWYL1	Bacteria; Proteobacteria; Gammaproteobacteria; Oceanospirillales; Oceanospirillaceae; Marinomonas; Marinomonas sp. MWYL1	3	24	0	4439
Marivirga tractuosa DSM 4126	Bacteria; Bacteroidetes/Chlorobi group; Bacteroidetes; Cytophagia; Cytophagales; Flammeovirgaceae; Marivirga; Marivirga tractuosa; Marivirga tractuosa DSM 4126	5	85	3	3757
Megasphaera elsdenii DSM 20460	Bacteria; Firmicutes; Negativicutes; Selenomonadales; Veillonellaceae; Megasphaera; Megasphaera elsdenii; Megasphaera elsdenii DSM 20460	1	4	0	2219
Meiothermus ruber DSM 1279	Bacteria; Deinococcus-Thermus; Deinococci; Thermales; Thermaceae; Meiothermus; Meiothermus ruber; Meiothermus ruber DSM 1279	1	26	1	3056
Meiothermus silvanus DSM 9946	Bacteria; Deinococcus-Thermus; Deinococci; Thermales; Thermaceae; Meiothermus; Meiothermus silvanus; Meiothermus silvanus DSM 9946	2	38	2	3505
Melioribacter roseus P3M	Bacteria; Bacteroidetes/Chlorobi group; Ignavibacteria; Ignavibacteria; Ignavibacteriales; Ignavibacteriaceae; Melioribacter; Melioribacter roseus; Melioribacter roseus P3M	2	43	0	2840
Melissococcus plutonius ATCC 35311	Bacteria; Firmicutes; Bacilli; Lactobacillales; Enterococcaceae; Melissococcus; Melissococcus plutonius; Melissococcus plutonius ATCC 35311	1	5	0	1885
Melissococcus plutonius DAT561	Bacteria; Firmicutes; Bacilli; Lactobacillales; Enterococcaceae; Melissococcus; Melissococcus plutonius; Melissococcus plutonius DAT561	1	7	0
Mesoplasma florum L1	Bacteria; Tenericutes; Mollicutes; Entomoplasmatales; Entomoplasmataceae; Mesoplasma; Mesoplasma florum; Mesoplasma florum L1	0	0	0	682
Mesorhizobium ciceri biovar biserrulae WSM1271	Bacteria; Proteobacteria; Alphaproteobacteria; Rhizobiales; Phyllobacteriaceae; Mesorhizobium; Mesorhizobium ciceri; Mesorhizobium ciceri biovar biserrulae; Mesorhizobium ciceri biovar biserrulae WSM1271	4	31	2	6264
Mesorhizobium loti MAFF303099	Bacteria; Proteobacteria; Alphaproteobacteria; Rhizobiales; Phyllobacteriaceae; Mesorhizobium; Mesorhizobium loti; Mesorhizobium loti MAFF303099	3	48	1	7272
Mesorhizobium opportunistum WSM2075	Bacteria; Proteobacteria; Alphaproteobacteria; Rhizobiales; Phyllobacteriaceae; Mesorhizobium; Mesorhizobium opportunistum; Mesorhizobium opportunistum WSM2075	2	38	1	6508
Mesorhizobium sp. BNC1	Bacteria; Proteobacteria; Alphaproteobacteria; Rhizobiales; Phyllobacteriaceae; Chelativorans; Chelativorans sp. BNC1	5	19	0	4543
Mesotoga prima MesG1.Ag.4.2	Bacteria; Thermotogae; Thermotogae; Thermotogales; Thermotogaceae; Mesotoga; Mesotoga prima; Mesotoga prima MesG1.Ag.4.2	3	10	1	2574
Methylacidiphilum infernorum V4	Bacteria; Chlamydiae/Verrucomicrobia group; Verrucomicrobia; unclassified Verrucomicrobia; Methylacidiphilales; Methylacidiphilaceae; Methylacidiphilum; Methylacidiphilum infernorum; Methylacidiphilum infernorum V4	1	19	0	2472
Methylibium petroleiphilum PM1	Bacteria; Proteobacteria; Betaproteobacteria; Burkholderiales; unclassified Burkholderiales; Burkholderiales Genera incertae sedis; Methylibium; Methylibium petroleiphilum; Methylibium petroleiphilum PM1	0	23	2	4449
Methylobacillus flagellatus KT	Bacteria; Proteobacteria; Betaproteobacteria; Methylophilales; Methylophilaceae; Methylobacillus; Methylobacillus flagellatus; Methylobacillus flagellatus KT	0	20	3	2753
Methylobacterium chloromethanicum CM4	Bacteria; Proteobacteria; Alphaproteobacteria; Rhizobiales; Methylobacteriaceae; Methylobacterium; Methylobacterium extorquens group; Methylobacterium chloromethanicum; Methylobacterium chloromethanicum CM4	2	15	1	5516
Methylobacterium extorquens AM1	Bacteria; Proteobacteria; Alphaproteobacteria; Rhizobiales; Methylobacteriaceae; Methylobacterium; Methylobacterium extorquens group; Methylobacterium extorquens; Methylobacterium extorquens AM1	2	16	1	6212
Methylobacterium extorquens DM4	Bacteria; Proteobacteria; Alphaproteobacteria; Rhizobiales; Methylobacteriaceae; Methylobacterium; Methylobacterium extorquens group; Methylobacterium extorquens; Methylobacterium extorquens DM4	1	17	1	5736
Methylobacterium extorquens PA1	Bacteria; Proteobacteria; Alphaproteobacteria; Rhizobiales; Methylobacteriaceae; Methylobacterium; Methylobacterium extorquens group; Methylobacterium extorquens; Methylobacterium extorquens PA1	1	15	1	4829
Methylobacterium nodulans ORS 2060	Bacteria; Proteobacteria; Alphaproteobacteria; Rhizobiales; Methylobacteriaceae; Methylobacterium; Methylobacterium nodulans; Methylobacterium nodulans ORS 2060	6	45	1	8308
Methylobacterium populi BJ001	Bacteria; Proteobacteria; Alphaproteobacteria; Rhizobiales; Methylobacteriaceae; Methylobacterium; Methylobacterium populi; Methylobacterium populi BJ001	1	16	1	5365
Methylobacterium radiotolerans JCM 2831	Bacteria; Proteobacteria; Alphaproteobacteria; Rhizobiales; Methylobacteriaceae; Methylobacterium; Methylobacterium radiotolerans; Methylobacterium radiotolerans JCM 2831	3	18	2	6431
Methylobacterium sp. 4-46	Bacteria; Proteobacteria; Alphaproteobacteria; Rhizobiales; Methylobacteriaceae; Methylobacterium; Methylobacterium sp. 4-46	3	36	1	6692
Methylocella silvestris BL2	Bacteria; Proteobacteria; Alphaproteobacteria; Rhizobiales; Beijerinckiaceae; Methylocella; Methylocella silvestris; Methylocella silvestris BL2	2	20	2	3818
Methylococcus capsulatus str. Bath	Bacteria; Proteobacteria; Gammaproteobacteria; Methylococcales; Methylococcaceae; Methylococcus; Methylococcus capsulatus; Methylococcus capsulatus str. Bath	3	23	3	2956
Methylomicrobium alcaliphilum	Bacteria; Proteobacteria; Gammaproteobacteria; Methylococcales; Methylococcaceae; Methylomicrobium; Methylomicrobium alcaliphilum	3	36	2	3981
Methylomonas methanica MC09	Bacteria; Proteobacteria; Gammaproteobacteria; Methylococcales; Methylococcaceae; Methylomonas; Methylomonas methanica; Methylomonas methanica MC09	6	36	3	4494
Methylophaga sp. JAM1	Bacteria; Proteobacteria; Gammaproteobacteria; Thiotrichales; Piscirickettsiaceae; Methylophaga; Methylophaga sp. JAM1	1	22	1	3022
Methylophaga sp. JAM7	Bacteria; Proteobacteria; Gammaproteobacteria; Thiotrichales; Piscirickettsiaceae; Methylophaga; Methylophaga sp. JAM7	0	17	1	2691
Methylotenera mobilis JLW8	Bacteria; Proteobacteria; Betaproteobacteria; Methylophilales; Methylophilaceae; Methylotenera; Methylotenera mobilis; Methylotenera mobilis JLW8	0	25	3	2338
Methylotenera versatilis 301	Bacteria; Proteobacteria; Betaproteobacteria; Methylophilales; Methylophilaceae; Methylotenera; Methylotenera versatilis; Methylotenera versatilis 301	1	30	2	2764
Methylovorus glucosetrophus SIP3-4	Bacteria; Proteobacteria; Betaproteobacteria; Methylophilales; Methylophilaceae; Methylovorus; Methylovorus glucosotrophus; Methylovorus glucosetrophus SIP3-4	1	29	3	2909
Methylovorus sp. MP688	Bacteria; Proteobacteria; Betaproteobacteria; Methylophilales; Methylophilaceae; Methylovorus; Methylovorus sp. MP688	1	27	2	2712
Micavibrio aeruginosavorus ARL-13	Bacteria; Proteobacteria; Alphaproteobacteria; unclassified Alphaproteobacteria; Micavibrio; Micavibrio aeruginosavorus; Micavibrio aeruginosavorus ARL-13	1	16	3	2432
Microbacterium testaceum StLB037	Bacteria; Actinobacteria; Actinobacteria; Actinobacteridae; Actinomycetales; Micrococcineae; Microbacteriaceae; Microbacterium; Microbacterium testaceum; Microbacterium testaceum StLB037	1	10	0	3676
Micrococcus luteus NCTC 2665	Bacteria; Actinobacteria; Actinobacteria; Actinobacteridae; Actinomycetales; Micrococcineae; Micrococcaceae; Micrococcus; Micrococcus luteus; Micrococcus luteus NCTC 2665	2	3	1	2236
Microcystis aeruginosa NIES-843	Bacteria; Cyanobacteria; Chroococcales; Microcystis; Microcystis aeruginosa; Microcystis aeruginosa NIES-843	12	59	1	6312
Microlunatus phosphovorus NM-1	Bacteria; Actinobacteria; Actinobacteria; Actinobacteridae; Actinomycetales; Propionibacterineae; Propionibacteriaceae; Microlunatus; Microlunatus phosphovorus; Microlunatus phosphovorus NM-1	1	32	3	5338
Micromonospora aurantiaca ATCC 27029	Bacteria; Actinobacteria; Actinobacteria; Actinobacteridae; Actinomycetales; Micromonosporineae; Micromonosporaceae; Micromonospora; Micromonospora aurantiaca; Micromonospora aurantiaca ATCC 27029	4	47	1	6222
Micromonospora sp. L5	Bacteria; Actinobacteria; Actinobacteria; Actinobacteridae; Actinomycetales; Micromonosporineae; Micromonosporaceae; Micromonospora; Micromonospora sp. L5	7	38	1	6150
Mobiluncus curtisii ATCC 43063	Bacteria; Actinobacteria; Actinobacteria; Actinobacteridae; Actinomycetales; Actinomycineae; Actinomycetaceae; Mobiluncus/Falcivibrio group; Mobiluncus; Mobiluncus curtisii; Mobiluncus curtisii ATCC 43063	2	1	0	1909
Modestobacter marinus	Bacteria; Actinobacteria; Actinobacteria; Actinobacteridae; Actinomycetales; Frankineae; Geodermatophilaceae; Modestobacter; Modestobacter marinus	2	17	1
Moorella thermoacetica ATCC 39073	Bacteria; Firmicutes; Clostridia; Thermoanaerobacterales; Thermoanaerobacteraceae; Moorella group; Moorella; Moorella thermoacetica; Moorella thermoacetica ATCC 39073	3	8	0	2463
Moraxella catarrhalis RH4	Bacteria; Proteobacteria; Gammaproteobacteria; Pseudomonadales; Moraxellaceae; Moraxella; Branhamella; Moraxella catarrhalis; Moraxella catarrhalis RH4	0	7	0	1886
Muricauda ruestringensis DSM 13258	Bacteria; Bacteroidetes/Chlorobi group; Bacteroidetes; Flavobacteriia; Flavobacteriales; Flavobacteriaceae; Muricauda; Muricauda ruestringensis; Muricauda ruestringensis DSM 13258	4	58	2	3432
Mycobacterium abscessus ATCC 19977	Bacteria; Actinobacteria; Actinobacteria; Actinobacteridae; Actinomycetales; Corynebacterineae; Mycobacteriaceae; Mycobacterium; Mycobacterium chelonae group; Mycobacterium abscessus subgroup; Mycobacterium abscessus; Mycobacterium abscessus ATCC 19977	4	11	1	4942
Mycobacterium africanum GM041182	Bacteria; Actinobacteria; Actinobacteria; Actinobacteridae; Actinomycetales; Corynebacterineae; Mycobacteriaceae; Mycobacterium; Mycobacterium tuberculosis complex; Mycobacterium africanum; Mycobacterium africanum GM041182	0	7	0	3830
Mycobacterium avium 104	Bacteria; Actinobacteria; Actinobacteria; Actinobacteridae; Actinomycetales; Corynebacterineae; Mycobacteriaceae; Mycobacterium; Mycobacterium avium complex (MAC); Mycobacterium avium; Mycobacterium avium 104	2	6	0	5120
Mycobacterium avium subsp. paratuberculosis K-10	Bacteria; Actinobacteria; Actinobacteria; Actinobacteridae; Actinomycetales; Corynebacterineae; Mycobacteriaceae; Mycobacterium; Mycobacterium avium complex (MAC); Mycobacterium avium; Mycobacterium avium subsp. paratuberculosis; Mycobacterium avium subsp. paratuberculosis K-10	2	8	0	4350
Mycobacterium bovis AF2122/97	Bacteria; Actinobacteria; Actinobacteria; Actinobacteridae; Actinomycetales; Corynebacterineae; Mycobacteriaceae; Mycobacterium; Mycobacterium tuberculosis complex; Mycobacterium bovis; Mycobacterium bovis AF2122/97	0	8	0	3918
Mycobacterium bovis BCG str. Mexico	Bacteria; Actinobacteria; Actinobacteria; Actinobacteridae; Actinomycetales; Corynebacterineae; Mycobacteriaceae; Mycobacterium; Mycobacterium tuberculosis complex; Mycobacterium bovis; Mycobacterium bovis BCG; Mycobacterium bovis BCG str. Mexico	0	9	0	3952
Mycobacterium bovis BCG str. Pasteur 1173P2	Bacteria; Actinobacteria; Actinobacteria; Actinobacteridae; Actinomycetales; Corynebacterineae; Mycobacteriaceae; Mycobacterium; Mycobacterium tuberculosis complex; Mycobacterium bovis; Mycobacterium bovis BCG; Mycobacterium bovis BCG str. Pasteur 1173P2	0	9	0	3949
Mycobacterium bovis BCG str. Tokyo 172	Bacteria; Actinobacteria; Actinobacteria; Actinobacteridae; Actinomycetales; Corynebacterineae; Mycobacteriaceae; Mycobacterium; Mycobacterium tuberculosis complex; Mycobacterium bovis; Mycobacterium bovis BCG; Mycobacterium bovis BCG str. Tokyo 172	0	9	0	3944
Mycobacterium canettii CIPT 140010059	Bacteria; Actinobacteria; Actinobacteria; Actinobacteridae; Actinomycetales; Corynebacterineae; Mycobacteriaceae; Mycobacterium; Mycobacterium tuberculosis complex; Mycobacterium canettii; Mycobacterium canettii CIPT 140010059	0	7	0	3861
Mycobacterium chubuense NBB4	Bacteria; Actinobacteria; Actinobacteria; Actinobacteridae; Actinomycetales; Corynebacterineae; Mycobacteriaceae; Mycobacterium; Mycobacterium chubuense; Mycobacterium chubuense NBB4	0	14	0	5843
Mycobacterium gilvum PYR-GCK	Bacteria; Actinobacteria; Actinobacteria; Actinobacteridae; Actinomycetales; Corynebacterineae; Mycobacteriaceae; Mycobacterium; Mycobacterium gilvum; Mycobacterium gilvum PYR-GCK	0	16	0	5579
Mycobacterium gilvum Spyr1	Bacteria; Actinobacteria; Actinobacteria; Actinobacteridae; Actinomycetales; Corynebacterineae; Mycobacteriaceae; Mycobacterium; Mycobacterium gilvum; Mycobacterium gilvum Spyr1	0	15	0	5349
Mycobacterium intracellulare ATCC 13950	Bacteria; Actinobacteria; Actinobacteria; Actinobacteridae; Actinomycetales; Corynebacterineae; Mycobacteriaceae; Mycobacterium; Mycobacterium avium complex (MAC); Mycobacterium intracellulare; Mycobacterium intracellulare ATCC 13950	2	7	0	5144
Mycobacterium intracellulare MOTT-02	Bacteria; Actinobacteria; Actinobacteria; Actinobacteridae; Actinomycetales; Corynebacterineae; Mycobacteriaceae; Mycobacterium; Mycobacterium avium complex (MAC); Mycobacterium intracellulare; Mycobacterium intracellulare MOTT-02	2	8	0	5149
Mycobacterium intracellulare MOTT-64	Bacteria; Actinobacteria; Actinobacteria; Actinobacteridae; Actinomycetales; Corynebacterineae; Mycobacteriaceae; Mycobacterium; Mycobacterium avium complex (MAC); Mycobacterium intracellulare; Mycobacterium intracellulare MOTT-64	2	8	0	5249
Mycobacterium leprae Br4923	Bacteria; Actinobacteria; Actinobacteria; Actinobacteridae; Actinomycetales; Corynebacterineae; Mycobacteriaceae; Mycobacterium; Mycobacterium leprae; Mycobacterium leprae Br4923	0	4	0	1604
Mycobacterium leprae TN	Bacteria; Actinobacteria; Actinobacteria; Actinobacteridae; Actinomycetales; Corynebacterineae; Mycobacteriaceae; Mycobacterium; Mycobacterium leprae; Mycobacterium leprae TN	0	4	0	1605
Mycobacterium marinum M	Bacteria; Actinobacteria; Actinobacteria; Actinobacteridae; Actinomycetales; Corynebacterineae; Mycobacteriaceae; Mycobacterium; Mycobacterium marinum; Mycobacterium marinum M	0	18	0	5452
Mycobacterium massiliense str. GO 06	Bacteria; Actinobacteria; Actinobacteria; Actinobacteridae; Actinomycetales; Corynebacterineae; Mycobacteriaceae; Mycobacterium; Mycobacterium chelonae group; Mycobacterium abscessus subgroup; Mycobacterium massiliense; Mycobacterium massiliense str. GO 06	1	5	0	2626
Mycobacterium rhodesiae NBB3	Bacteria; Actinobacteria; Actinobacteria; Actinobacteridae; Actinomycetales; Corynebacterineae; Mycobacteriaceae; Mycobacterium; Mycobacterium rhodesiae; Mycobacterium rhodesiae NBB3	0	19	2	6147
Mycobacterium smegmatis str. MC2 155	Bacteria; Actinobacteria; Actinobacteria; Actinobacteridae; Actinomycetales; Corynebacterineae; Mycobacteriaceae; Mycobacterium; Mycobacterium smegmatis; Mycobacterium smegmatis str. MC2 155	0	16	1	6717
Mycobacterium smegmatis str. MC2 155	Bacteria; Actinobacteria; Actinobacteria; Actinobacteridae; Actinomycetales; Corynebacterineae; Mycobacteriaceae; Mycobacterium; Mycobacterium smegmatis; Mycobacterium smegmatis str. MC2 155	0	17	1	6690
Mycobacterium sp. JDM601	Bacteria; Actinobacteria; Actinobacteria; Actinobacteridae; Actinomycetales; Corynebacterineae; Mycobacteriaceae; Mycobacterium; Mycobacterium sp. JDM601	1	7	2	4346
Mycobacterium sp. JLS	Bacteria; Actinobacteria; Actinobacteria; Actinobacteridae; Actinomycetales; Corynebacterineae; Mycobacteriaceae; Mycobacterium; Mycobacterium sp. JLS	2	15	0	5739
Mycobacterium sp. KMS	Bacteria; Actinobacteria; Actinobacteria; Actinobacteridae; Actinomycetales; Corynebacterineae; Mycobacteriaceae; Mycobacterium; Mycobacterium sp. KMS	2	14	2	5975
Mycobacterium sp. MCS	Bacteria; Actinobacteria; Actinobacteria; Actinobacteridae; Actinomycetales; Corynebacterineae; Mycobacteriaceae; Mycobacterium; Mycobacterium sp. MCS	2	13	2	5615
Mycobacterium sp. MOTT36Y	Bacteria; Actinobacteria; Actinobacteria; Actinobacteridae; Actinomycetales; Corynebacterineae; Mycobacteriaceae; Mycobacterium; Mycobacterium sp. MOTT36Y	2	8	0	5128
Mycobacterium tuberculosis CCDC5079	Bacteria; Actinobacteria; Actinobacteria; Actinobacteridae; Actinomycetales; Corynebacterineae; Mycobacteriaceae; Mycobacterium; Mycobacterium tuberculosis complex; Mycobacterium tuberculosis; Mycobacterium tuberculosis CCDC5079	0	8	0	3646
Mycobacterium tuberculosis CCDC5180	Bacteria; Actinobacteria; Actinobacteria; Actinobacteridae; Actinomycetales; Corynebacterineae; Mycobacteriaceae; Mycobacterium; Mycobacterium tuberculosis complex; Mycobacterium tuberculosis; Mycobacterium tuberculosis CCDC5180	0	8	0	3590
Mycobacterium tuberculosis CDC1551	Bacteria; Actinobacteria; Actinobacteria; Actinobacteridae; Actinomycetales; Corynebacterineae; Mycobacteriaceae; Mycobacterium; Mycobacterium tuberculosis complex; Mycobacterium tuberculosis; Mycobacterium tuberculosis CDC1551	0	9	0	4189
Mycobacterium tuberculosis CTRI-2	Bacteria; Actinobacteria; Actinobacteria; Actinobacteridae; Actinomycetales; Corynebacterineae; Mycobacteriaceae; Mycobacterium; Mycobacterium tuberculosis complex; Mycobacterium tuberculosis; Mycobacterium tuberculosis CTRI-2	0	8	0	3944
Mycobacterium tuberculosis F11	Bacteria; Actinobacteria; Actinobacteria; Actinobacteridae; Actinomycetales; Corynebacterineae; Mycobacteriaceae; Mycobacterium; Mycobacterium tuberculosis complex; Mycobacterium tuberculosis; Mycobacterium tuberculosis F11	0	7	0	3941
Mycobacterium tuberculosis H37Ra	Bacteria; Actinobacteria; Actinobacteria; Actinobacteridae; Actinomycetales; Corynebacterineae; Mycobacteriaceae; Mycobacterium; Mycobacterium tuberculosis complex; Mycobacterium tuberculosis; Mycobacterium tuberculosis H37Ra	0	7	0	4034
Mycobacterium tuberculosis H37Rv	Bacteria; Actinobacteria; Actinobacteria; Actinobacteridae; Actinomycetales; Corynebacterineae; Mycobacteriaceae; Mycobacterium; Mycobacterium tuberculosis complex; Mycobacterium tuberculosis; Mycobacterium tuberculosis H37Rv	0	7	0	4018
Mycobacterium tuberculosis H37Rv	Bacteria; Actinobacteria; Actinobacteria; Actinobacteridae; Actinomycetales; Corynebacterineae; Mycobacteriaceae; Mycobacterium; Mycobacterium tuberculosis complex; Mycobacterium tuberculosis; Mycobacterium tuberculosis H37Rv	0	7	0	4111
Mycobacterium tuberculosis KZN 1435	Bacteria; Actinobacteria; Actinobacteria; Actinobacteridae; Actinomycetales; Corynebacterineae; Mycobacteriaceae; Mycobacterium; Mycobacterium tuberculosis complex; Mycobacterium tuberculosis; Mycobacterium tuberculosis KZN 1435	0	7	0	4059
Mycobacterium tuberculosis KZN 4207	Bacteria; Actinobacteria; Actinobacteria; Actinobacteridae; Actinomycetales; Corynebacterineae; Mycobacteriaceae; Mycobacterium; Mycobacterium tuberculosis complex; Mycobacterium tuberculosis; Mycobacterium tuberculosis KZN 4207	0	7	0	3996
Mycobacterium tuberculosis KZN 605	Bacteria; Actinobacteria; Actinobacteria; Actinobacteridae; Actinomycetales; Corynebacterineae; Mycobacteriaceae; Mycobacterium; Mycobacterium tuberculosis complex; Mycobacterium tuberculosis; Mycobacterium tuberculosis KZN 605	0	7	0	4001
Mycobacterium tuberculosis RGTB327	Bacteria; Actinobacteria; Actinobacteria; Actinobacteridae; Actinomycetales; Corynebacterineae; Mycobacteriaceae; Mycobacterium; Mycobacterium tuberculosis complex; Mycobacterium tuberculosis; Mycobacterium tuberculosis RGTB327	0	3	0	3691
Mycobacterium tuberculosis RGTB423	Bacteria; Actinobacteria; Actinobacteria; Actinobacteridae; Actinomycetales; Corynebacterineae; Mycobacteriaceae; Mycobacterium; Mycobacterium tuberculosis complex; Mycobacterium tuberculosis; Mycobacterium tuberculosis RGTB423	0	4	0	3622
Mycobacterium tuberculosis UT205	Bacteria; Actinobacteria; Actinobacteria; Actinobacteridae; Actinomycetales; Corynebacterineae; Mycobacteriaceae; Mycobacterium; Mycobacterium tuberculosis complex; Mycobacterium tuberculosis; Mycobacterium tuberculosis UT205	0	7	0	3796
Mycobacterium ulcerans Agy99	Bacteria; Actinobacteria; Actinobacteria; Actinobacteridae; Actinomycetales; Corynebacterineae; Mycobacteriaceae; Mycobacterium; Mycobacterium ulcerans; Mycobacterium ulcerans Agy99	1	9	0	4241
Mycobacterium vanbaalenii PYR-1	Bacteria; Actinobacteria; Actinobacteria; Actinobacteridae; Actinomycetales; Corynebacterineae; Mycobacteriaceae; Mycobacterium; Mycobacterium vanbaalenii; Mycobacterium vanbaalenii PYR-1	1	20	0	5979
Mycoplasma agalactiae	Bacteria; Tenericutes; Mollicutes; Mycoplasmatales; Mycoplasmataceae; Mycoplasma; Mycoplasma agalactiae	0	0	0	813
Mycoplasma agalactiae PG2	Bacteria; Tenericutes; Mollicutes; Mycoplasmatales; Mycoplasmataceae; Mycoplasma; Mycoplasma agalactiae; Mycoplasma agalactiae PG2	0	0	0	742
Mycoplasma arthritidis 158L3-1	Bacteria; Tenericutes; Mollicutes; Mycoplasmatales; Mycoplasmataceae; Mycoplasma; Mycoplasma arthritidis; Mycoplasma arthritidis 158L3-1	2	0	0	631
Mycoplasma bovis HB0801	Bacteria; Tenericutes; Mollicutes; Mycoplasmatales; Mycoplasmataceae; Mycoplasma; Mycoplasma bovis; Mycoplasma bovis HB0801	1	0	0	814
Mycoplasma bovis Hubei-1	Bacteria; Tenericutes; Mollicutes; Mycoplasmatales; Mycoplasmataceae; Mycoplasma; Mycoplasma bovis; Mycoplasma bovis Hubei-1	1	0	0	801
Mycoplasma bovis PG45	Bacteria; Tenericutes; Mollicutes; Mycoplasmatales; Mycoplasmataceae; Mycoplasma; Mycoplasma bovis; Mycoplasma bovis PG45	0	0	0	765
Mycoplasma capricolum subsp. capricolum ATCC 27343	Bacteria; Tenericutes; Mollicutes; Mycoplasmatales; Mycoplasmataceae; Mycoplasma; Mycoplasma mycoides group; Mycoplasma capricolum; Mycoplasma capricolum subsp. capricolum; Mycoplasma capricolum subsp. capricolum ATCC 27343	0	0	0	812
Mycoplasma conjunctivae HRC/581	Bacteria; Tenericutes; Mollicutes; Mycoplasmatales; Mycoplasmataceae; Mycoplasma; Mycoplasma conjunctivae; Mycoplasma conjunctivae HRC/581	0	0	0	692
Mycoplasma crocodyli MP145	Bacteria; Tenericutes; Mollicutes; Mycoplasmatales; Mycoplasmataceae; Mycoplasma; Mycoplasma crocodyli; Mycoplasma crocodyli MP145	0	0	0	689
Mycoplasma fermentans JER	Bacteria; Tenericutes; Mollicutes; Mycoplasmatales; Mycoplasmataceae; Mycoplasma; Mycoplasma fermentans; Mycoplasma fermentans JER	2	0	0	797
Mycoplasma fermentans M64	Bacteria; Tenericutes; Mollicutes; Mycoplasmatales; Mycoplasmataceae; Mycoplasma; Mycoplasma fermentans; Mycoplasma fermentans M64	2	0	0	1050
Mycoplasma gallisepticum str. F	Bacteria; Tenericutes; Mollicutes; Mycoplasmatales; Mycoplasmataceae; Mycoplasma; Mycoplasma gallisepticum; Mycoplasma gallisepticum str. F	0	0	0	756
Mycoplasma gallisepticum str. R(high)	Bacteria; Tenericutes; Mollicutes; Mycoplasmatales; Mycoplasmataceae; Mycoplasma; Mycoplasma gallisepticum; Mycoplasma gallisepticum str. R; Mycoplasma gallisepticum str. R(high)	0	0	0	766
Mycoplasma gallisepticum str. R(low)	Bacteria; Tenericutes; Mollicutes; Mycoplasmatales; Mycoplasmataceae; Mycoplasma; Mycoplasma gallisepticum; Mycoplasma gallisepticum str. R; Mycoplasma gallisepticum str. R(low)	0	0	0	763
Mycoplasma genitalium G37	Bacteria; Tenericutes; Mollicutes; Mycoplasmatales; Mycoplasmataceae; Mycoplasma; Mycoplasma genitalium; Mycoplasma genitalium G37	0	0	0	475
Mycoplasma haemocanis str. Illinois	Bacteria; Tenericutes; Mollicutes; Mycoplasmatales; Mycoplasmataceae; Mycoplasma; Mycoplasma haemocanis; Mycoplasma haemocanis str. Illinois	0	0	0	1156
Mycoplasma haemofelis Ohio2	Bacteria; Tenericutes; Mollicutes; Mycoplasmatales; Mycoplasmataceae; Mycoplasma; Mycoplasma haemofelis; Mycoplasma haemofelis Ohio2	0	0	0	1524
Mycoplasma haemofelis str. Langford 1	Bacteria; Tenericutes; Mollicutes; Mycoplasmatales; Mycoplasmataceae; Mycoplasma; Mycoplasma haemofelis; Mycoplasma haemofelis str. Langford 1	0	0	0	1545
Mycoplasma hominis ATCC 23114	Bacteria; Tenericutes; Mollicutes; Mycoplasmatales; Mycoplasmataceae; Mycoplasma; Mycoplasma hominis; Mycoplasma hominis ATCC 23114	0	0	0	523
Mycoplasma hyopneumoniae 168	Bacteria; Tenericutes; Mollicutes; Mycoplasmatales; Mycoplasmataceae; Mycoplasma; Mycoplasma hyopneumoniae; Mycoplasma hyopneumoniae 168	0	0	0	693
Mycoplasma hyopneumoniae 232	Bacteria; Tenericutes; Mollicutes; Mycoplasmatales; Mycoplasmataceae; Mycoplasma; Mycoplasma hyopneumoniae; Mycoplasma hyopneumoniae 232	0	0	0	691
Mycoplasma hyopneumoniae 7448	Bacteria; Tenericutes; Mollicutes; Mycoplasmatales; Mycoplasmataceae; Mycoplasma; Mycoplasma hyopneumoniae; Mycoplasma hyopneumoniae 7448	0	0	0	657
Mycoplasma hyopneumoniae J	Bacteria; Tenericutes; Mollicutes; Mycoplasmatales; Mycoplasmataceae; Mycoplasma; Mycoplasma hyopneumoniae; Mycoplasma hyopneumoniae J	0	0	0	657
Mycoplasma hyorhinis GDL-1	Bacteria; Tenericutes; Mollicutes; Mycoplasmatales; Mycoplasmataceae; Mycoplasma; Mycoplasma hyorhinis; Mycoplasma hyorhinis GDL-1	0	0	0	647
Mycoplasma hyorhinis HUB-1	Bacteria; Tenericutes; Mollicutes; Mycoplasmatales; Mycoplasmataceae; Mycoplasma; Mycoplasma hyorhinis; Mycoplasma hyorhinis HUB-1	0	0	0	658
Mycoplasma hyorhinis MCLD	Bacteria; Tenericutes; Mollicutes; Mycoplasmatales; Mycoplasmataceae; Mycoplasma; Mycoplasma hyorhinis; Mycoplasma hyorhinis MCLD	0	0	0	778
Mycoplasma leachii 99/014/6	Bacteria; Tenericutes; Mollicutes; Mycoplasmatales; Mycoplasmataceae; Mycoplasma; Mycoplasma mycoides group; Mycoplasma leachii; Mycoplasma leachii 99/014/6	0	0	0	905
Mycoplasma leachii PG50	Bacteria; Tenericutes; Mollicutes; Mycoplasmatales; Mycoplasmataceae; Mycoplasma; Mycoplasma mycoides group; Mycoplasma leachii; Mycoplasma leachii PG50	0	0	0	882
Mycoplasma mobile 163K	Bacteria; Tenericutes; Mollicutes; Mycoplasmatales; Mycoplasmataceae; Mycoplasma; Mycoplasma mobile; Mycoplasma mobile 163K	0	0	0	633
Mycoplasma mycoides subsp. capri LC str. 95010	Bacteria; Tenericutes; Mollicutes; Mycoplasmatales; Mycoplasmataceae; Mycoplasma; Mycoplasma mycoides group; Mycoplasma mycoides; Mycoplasma mycoides subsp. capri; Mycoplasma mycoides subsp. capri LC; Mycoplasma mycoides subsp. capri LC str. 95010	0	0	0	924
Mycoplasma mycoides subsp. mycoides SC str. PG1	Bacteria; Tenericutes; Mollicutes; Mycoplasmatales; Mycoplasmataceae; Mycoplasma; Mycoplasma mycoides group; Mycoplasma mycoides; Mycoplasma mycoides subsp. mycoides; Mycoplasma mycoides subsp. mycoides SC; Mycoplasma mycoides subsp. mycoides SC str. PG1	0	0	0	1017
Mycoplasma penetrans HF-2	Bacteria; Tenericutes; Mollicutes; Mycoplasmatales; Mycoplasmataceae; Mycoplasma; Mycoplasma penetrans; Mycoplasma penetrans HF-2	0	0	0	1037
Mycoplasma pneumoniae 309	Bacteria; Tenericutes; Mollicutes; Mycoplasmatales; Mycoplasmataceae; Mycoplasma; Mycoplasma pneumoniae; Mycoplasma pneumoniae 309	0	0	0	707
Mycoplasma pneumoniae FH	Bacteria; Tenericutes; Mollicutes; Mycoplasmatales; Mycoplasmataceae; Mycoplasma; Mycoplasma pneumoniae; Mycoplasma pneumoniae FH	0	0	0	629
Mycoplasma pneumoniae M129	Bacteria; Tenericutes; Mollicutes; Mycoplasmatales; Mycoplasmataceae; Mycoplasma; Mycoplasma pneumoniae; Mycoplasma pneumoniae M129	0	0	0	688
Mycoplasma pulmonis UAB CTIP	Bacteria; Tenericutes; Mollicutes; Mycoplasmatales; Mycoplasmataceae; Mycoplasma; Mycoplasma pulmonis; Mycoplasma pulmonis UAB CTIP	0	0	0	782
Mycoplasma putrefaciens KS1	Bacteria; Tenericutes; Mollicutes; Mycoplasmatales; Mycoplasmataceae; Mycoplasma; Mycoplasma putrefaciens; Mycoplasma putrefaciens KS1	0	0	0	650
Mycoplasma suis KI3806	Bacteria; Tenericutes; Mollicutes; Mycoplasmatales; Mycoplasmataceae; Mycoplasma; Mycoplasma suis; Mycoplasma suis KI3806	0	0	0	794
Mycoplasma suis str. Illinois	Bacteria; Tenericutes; Mollicutes; Mycoplasmatales; Mycoplasmataceae; Mycoplasma; Mycoplasma suis; Mycoplasma suis str. Illinois	0	0	0	845
Mycoplasma synoviae 53	Bacteria; Tenericutes; Mollicutes; Mycoplasmatales; Mycoplasmataceae; Mycoplasma; Mycoplasma synoviae; Mycoplasma synoviae 53	1	0	0	659
Mycoplasma wenyonii str. Massachusetts	Bacteria; Tenericutes; Mollicutes; Mycoplasmatales; Mycoplasmataceae; Mycoplasma; Mycoplasma wenyonii; Mycoplasma wenyonii str. Massachusetts	0	0	0	652
Myxococcus fulvus HW-1	Bacteria; Proteobacteria; delta/epsilon subdivisions; Deltaproteobacteria; Myxococcales; Cystobacterineae; Myxococcaceae; Myxococcus; Myxococcus fulvus; Myxococcus fulvus HW-1	40	167	4	7284
Myxococcus xanthus DK 1622	Bacteria; Proteobacteria; delta/epsilon subdivisions; Deltaproteobacteria; Myxococcales; Cystobacterineae; Myxococcaceae; Myxococcus; Myxococcus xanthus; Myxococcus xanthus DK 1622	41	172	7	7316
Nakamurella multipartita DSM 44233	Bacteria; Actinobacteria; Actinobacteria; Actinobacteridae; Actinomycetales; Frankineae; Nakamurellaceae; Nakamurella; Nakamurella multipartita; Nakamurella multipartita DSM 44233	3	25	2	5240
Natranaerobius thermophilus JW/NM-WN-LF	Bacteria; Firmicutes; Clostridia; Natranaerobiales; Natranaerobiaceae; Natranaerobius; Natranaerobius thermophilus; Natranaerobius thermophilus JW/NM-WN-LF	1	11	1	2906
Nautilia profundicola AmH	Bacteria; Proteobacteria; delta/epsilon subdivisions; Epsilonproteobacteria; Nautiliales; Nautiliaceae; Nautilia; Nautilia profundicola; Nautilia profundicola AmH	1	10	0	1730
Neisseria gonorrhoeae FA 1090	Bacteria; Proteobacteria; Betaproteobacteria; Neisseriales; Neisseriaceae; Neisseria; Neisseria gonorrhoeae; Neisseria gonorrhoeae FA 1090	0	9	1	2002
Neisseria gonorrhoeae NCCP11945	Bacteria; Proteobacteria; Betaproteobacteria; Neisseriales; Neisseriaceae; Neisseria; Neisseria gonorrhoeae; Neisseria gonorrhoeae NCCP11945	0	11	1	2680
Neisseria gonorrhoeae TCDC-NG08107	Bacteria; Proteobacteria; Betaproteobacteria; Neisseriales; Neisseriaceae; Neisseria; Neisseria gonorrhoeae; Neisseria gonorrhoeae TCDC-NG08107	0	11	1	2196
Neisseria lactamica 020-06	Bacteria; Proteobacteria; Betaproteobacteria; Neisseriales; Neisseriaceae; Neisseria; Neisseria lactamica; Neisseria lactamica 020-06	0	11	2	1972
Neisseria meningitidis 053442	Bacteria; Proteobacteria; Betaproteobacteria; Neisseriales; Neisseriaceae; Neisseria; Neisseria meningitidis; Neisseria meningitidis serogroup C; Neisseria meningitidis 053442	0	10	1	2020
Neisseria meningitidis 8013	Bacteria; Proteobacteria; Betaproteobacteria; Neisseriales; Neisseriaceae; Neisseria; Neisseria meningitidis; Neisseria meningitidis serogroup C; Neisseria meningitidis 8013	0	10	0	1913
Neisseria meningitidis alpha14	Bacteria; Proteobacteria; Betaproteobacteria; Neisseriales; Neisseriaceae; Neisseria; Neisseria meningitidis; Neisseria meningitidis alpha14	1	9	1	1872
Neisseria meningitidis alpha710	Bacteria; Proteobacteria; Betaproteobacteria; Neisseriales; Neisseriaceae; Neisseria; Neisseria meningitidis; Neisseria meningitidis serogroup B; Neisseria meningitidis alpha710	0	9	1	2017
Neisseria meningitidis FAM18	Bacteria; Proteobacteria; Betaproteobacteria; Neisseriales; Neisseriaceae; Neisseria; Neisseria meningitidis; Neisseria meningitidis serogroup C; Neisseria meningitidis FAM18	0	10	1	1917
Neisseria meningitidis G2136	Bacteria; Proteobacteria; Betaproteobacteria; Neisseriales; Neisseriaceae; Neisseria; Neisseria meningitidis; Neisseria meningitidis G2136	0	9	1	1928
Neisseria meningitidis H44/76	Bacteria; Proteobacteria; Betaproteobacteria; Neisseriales; Neisseriaceae; Neisseria; Neisseria meningitidis; Neisseria meningitidis serogroup B; Neisseria meningitidis H44/76	0	9	1	1961
Neisseria meningitidis M01-240149	Bacteria; Proteobacteria; Betaproteobacteria; Neisseriales; Neisseriaceae; Neisseria; Neisseria meningitidis; Neisseria meningitidis M01-240149	0	9	1	1936
Neisseria meningitidis M01-240355	Bacteria; Proteobacteria; Betaproteobacteria; Neisseriales; Neisseriaceae; Neisseria; Neisseria meningitidis; Neisseria meningitidis M01-240355	0	9	1	1971
Neisseria meningitidis M04-240196	Bacteria; Proteobacteria; Betaproteobacteria; Neisseriales; Neisseriaceae; Neisseria; Neisseria meningitidis; Neisseria meningitidis M04-240196	0	9	1	1947
Neisseria meningitidis MC58	Bacteria; Proteobacteria; Betaproteobacteria; Neisseriales; Neisseriaceae; Neisseria; Neisseria meningitidis; Neisseria meningitidis serogroup B; Neisseria meningitidis MC58	0	9	2	2063
Neisseria meningitidis NZ-05/33	Bacteria; Proteobacteria; Betaproteobacteria; Neisseriales; Neisseriaceae; Neisseria; Neisseria meningitidis; Neisseria meningitidis NZ-05/33	0	9	1	1948
Neisseria meningitidis WUE 2594	Bacteria; Proteobacteria; Betaproteobacteria; Neisseriales; Neisseriaceae; Neisseria; Neisseria meningitidis; Neisseria meningitidis WUE 2594	0	8	0	1941
Neisseria meningitidis Z2491	Bacteria; Proteobacteria; Betaproteobacteria; Neisseriales; Neisseriaceae; Neisseria; Neisseria meningitidis; Neisseria meningitidis serogroup A; Neisseria meningitidis Z2491	0	9	1	1909
Neorickettsia risticii str. Illinois	Bacteria; Proteobacteria; Alphaproteobacteria; Rickettsiales; Anaplasmataceae; Neorickettsia; Neorickettsia risticii; Neorickettsia risticii str. Illinois	0	3	4	892
Neorickettsia sennetsu str. Miyayama	Bacteria; Proteobacteria; Alphaproteobacteria; Rickettsiales; Anaplasmataceae; Neorickettsia; Neorickettsia sennetsu; Neorickettsia sennetsu str. Miyayama	0	3	3	932
Niastella koreensis GR20-10	Bacteria; Bacteroidetes/Chlorobi group; Bacteroidetes; Sphingobacteriia; Sphingobacteriales; Chitinophagaceae; Niastella; Niastella koreensis; Niastella koreensis GR20-10	12	212	4	7174
Nitratifractor salsuginis DSM 16511	Bacteria; Proteobacteria; delta/epsilon subdivisions; Epsilonproteobacteria; unclassified Epsilonproteobacteria; Nitratifractor; Nitratifractor salsuginis; Nitratifractor salsuginis DSM 16511	1	8	2	2088
Nitratiruptor sp. SB155-2	Bacteria; Proteobacteria; delta/epsilon subdivisions; Epsilonproteobacteria; unclassified Epsilonproteobacteria; Nitratiruptor; Nitratiruptor sp. SB155-2	1	14	2	1843
Nitrobacter hamburgensis X14	Bacteria; Proteobacteria; Alphaproteobacteria; Rhizobiales; Bradyrhizobiaceae; Nitrobacter; Nitrobacter hamburgensis; Nitrobacter hamburgensis X14	1	19	0	4326
Nitrobacter winogradskyi Nb-255	Bacteria; Proteobacteria; Alphaproteobacteria; Rhizobiales; Bradyrhizobiaceae; Nitrobacter; Nitrobacter winogradskyi; Nitrobacter winogradskyi Nb-255	3	20	0	3122
Nitrosococcus halophilus Nc4	Bacteria; Proteobacteria; Gammaproteobacteria; Chromatiales; Chromatiaceae; Nitrosococcus; Nitrosococcus halophilus; Nitrosococcus halophilus Nc4	3	31	0	3817
Nitrosococcus oceani ATCC 19707	Bacteria; Proteobacteria; Gammaproteobacteria; Chromatiales; Chromatiaceae; Nitrosococcus; Nitrosococcus oceani; Nitrosococcus oceani ATCC 19707	2	25	0	3017
Nitrosococcus watsonii C-113	Bacteria; Proteobacteria; Gammaproteobacteria; Chromatiales; Chromatiaceae; Nitrosococcus; Nitrosococcus watsonii; Nitrosococcus watsonii C-113	2	28	0	2907
Nitrosomonas europaea ATCC 19718	Bacteria; Proteobacteria; Betaproteobacteria; Nitrosomonadales; Nitrosomonadaceae; Nitrosomonas; Nitrosomonas europaea; Nitrosomonas europaea ATCC 19718	0	17	2	2461
Nitrosomonas eutropha C91	Bacteria; Proteobacteria; Betaproteobacteria; Nitrosomonadales; Nitrosomonadaceae; Nitrosomonas; Nitrosomonas eutropha; Nitrosomonas eutropha C91	0	15	2	2551
Nitrosomonas sp. AL212	Bacteria; Proteobacteria; Betaproteobacteria; Nitrosomonadales; Nitrosomonadaceae; Nitrosomonas; Nitrosomonas sp. AL212	1	17	3	2983
Nitrosomonas sp. Is79A3	Bacteria; Proteobacteria; Betaproteobacteria; Nitrosomonadales; Nitrosomonadaceae; Nitrosomonas; Nitrosomonas sp. Is79A3	1	20	3	3372
Nitrosospira multiformis ATCC 25196	Bacteria; Proteobacteria; Betaproteobacteria; Nitrosomonadales; Nitrosomonadaceae; Nitrosospira; Nitrosospira multiformis; Nitrosospira multiformis ATCC 25196	1	26	1	2805
Nocardia cyriacigeorgica GUH-2	Bacteria; Actinobacteria; Actinobacteria; Actinobacteridae; Actinomycetales; Corynebacterineae; Nocardiaceae; Nocardia; Nocardia cyriacigeorgica; Nocardia cyriacigeorgica GUH-2	5	25	2	5477
Nocardia farcinica IFM 10152	Bacteria; Actinobacteria; Actinobacteria; Actinobacteridae; Actinomycetales; Corynebacterineae; Nocardiaceae; Nocardia; Nocardia farcinica; Nocardia farcinica IFM 10152	5	18	1	5934
Nocardioides sp. JS614	Bacteria; Actinobacteria; Actinobacteria; Actinobacteridae; Actinomycetales; Propionibacterineae; Nocardioidaceae; Nocardioides; Nocardioides sp. JS614	1	12	0	4909
Nocardiopsis dassonvillei subsp. dassonvillei DSM 43111	Bacteria; Actinobacteria; Actinobacteria; Actinobacteridae; Actinomycetales; Streptosporangineae; Nocardiopsaceae; Nocardiopsis; Nocardiopsis dassonvillei; Nocardiopsis dassonvillei subsp. dassonvillei; Nocardiopsis dassonvillei subsp. dassonvillei DSM 43111	8	28	1	5497
Nostoc azollae' 0708	Bacteria; Cyanobacteria; Nostocales; Nostocaceae; Trichormus; Trichormus azollae; 'Nostoc azollae' 0708	10	34	1	3651
Nostoc punctiforme PCC 73102	Bacteria; Cyanobacteria; Nostocales; Nostocaceae; Nostoc; Nostoc punctiforme; Nostoc punctiforme PCC 73102	26	107	2	6689
Nostoc sp. PCC 7120	Bacteria; Cyanobacteria; Nostocales; Nostocaceae; Nostoc; Nostoc sp. PCC 7120	27	74	3	6129
Novosphingobium aromaticivorans DSM 12444	Bacteria; Proteobacteria; Alphaproteobacteria; Sphingomonadales; Sphingomonadaceae; Novosphingobium; Novosphingobium aromaticivorans; Novosphingobium aromaticivorans DSM 12444	1	29	1	3937
Novosphingobium sp. PP1Y	Bacteria; Proteobacteria; Alphaproteobacteria; Sphingomonadales; Sphingomonadaceae; Novosphingobium; Novosphingobium sp. PP1Y	3	24	1	4664
Oceanimonas sp. GK1	Bacteria; Proteobacteria; Gammaproteobacteria; Aeromonadales; Aeromonadaceae; Oceanimonas; Oceanimonas sp. GK1	0	16	1	3221
Oceanithermus profundus DSM 14977	Bacteria; Deinococcus-Thermus; Deinococci; Thermales; Thermaceae; Oceanithermus; Oceanithermus profundus; Oceanithermus profundus DSM 14977	1	23	3	2373
Oceanobacillus iheyensis HTE831	Bacteria; Firmicutes; Bacilli; Bacillales; Bacillaceae; Oceanobacillus; Oceanobacillus iheyensis; Oceanobacillus iheyensis HTE831	4	12	0	3500
Ochrobactrum anthropi ATCC 49188	Bacteria; Proteobacteria; Alphaproteobacteria; Rhizobiales; Brucellaceae; Ochrobactrum; Ochrobactrum anthropi; Ochrobactrum anthropi ATCC 49188	1	13	1	4799
Odoribacter splanchnicus DSM 20712	Bacteria; Bacteroidetes/Chlorobi group; Bacteroidetes; Bacteroidia; Bacteroidales; Porphyromonadaceae; Odoribacter; Odoribacter splanchnicus; Odoribacter splanchnicus DSM 20712	6	101	0	3497
Oenococcus oeni PSU-1	Bacteria; Firmicutes; Bacilli; Lactobacillales; Leuconostocaceae; Oenococcus; Oenococcus oeni; Oenococcus oeni PSU-1	0	2	0	1691
Oligotropha carboxidovorans OM4	Bacteria; Proteobacteria; Alphaproteobacteria; Rhizobiales; Bradyrhizobiaceae; Oligotropha; Oligotropha carboxidovorans; Oligotropha carboxidovorans OM4	1	16	2	3574
Oligotropha carboxidovorans OM5	Bacteria; Proteobacteria; Alphaproteobacteria; Rhizobiales; Bradyrhizobiaceae; Oligotropha; Oligotropha carboxidovorans; Oligotropha carboxidovorans OM5	1	16	2	3629
Oligotropha carboxidovorans OM5	Bacteria; Proteobacteria; Alphaproteobacteria; Rhizobiales; Bradyrhizobiaceae; Oligotropha; Oligotropha carboxidovorans; Oligotropha carboxidovorans OM5	1	16	2	3722
Olsenella uli DSM 7084	Bacteria; Actinobacteria; Actinobacteria; Coriobacteridae; Coriobacteriales; Coriobacterineae; Coriobacteriaceae; Olsenella; Olsenella uli; Olsenella uli DSM 7084	2	9	0	1739
Onion yellows phytoplasma OY-M	Bacteria; Tenericutes; Mollicutes; Acholeplasmatales; Acholeplasmataceae; Candidatus Phytoplasma; Candidatus Phytoplasma asteris; Onion yellows phytoplasma; Onion yellows phytoplasma OY-M	0	0	0	749
Opitutus terrae PB90-1	Bacteria; Chlamydiae/Verrucomicrobia group; Verrucomicrobia; Opitutae; Opitutales; Opitutaceae; Opitutus; Opitutus terrae; Opitutus terrae PB90-1	4	60	2	4612
Orientia tsutsugamushi str. Boryong	Bacteria; Proteobacteria; Alphaproteobacteria; Rickettsiales; Rickettsiaceae; Rickettsieae; Orientia; Orientia tsutsugamushi; Orientia tsutsugamushi str. Boryong	1	15	37	1182
Orientia tsutsugamushi str. Ikeda	Bacteria; Proteobacteria; Alphaproteobacteria; Rickettsiales; Rickettsiaceae; Rickettsieae; Orientia; Orientia tsutsugamushi; Orientia tsutsugamushi str. Ikeda	4	23	47	1967
Ornithobacterium rhinotracheale DSM 15997	Bacteria; Bacteroidetes/Chlorobi group; Bacteroidetes; Flavobacteriia; Flavobacteriales; Flavobacteriaceae; Ornithobacterium; Ornithobacterium rhinotracheale; Ornithobacterium rhinotracheale DSM 15997	2	25	0	2267
Oscillibacter valericigenes Sjm18-20	Bacteria; Firmicutes; Clostridia; Clostridiales; Oscillospiraceae; Oscillibacter; Oscillibacter valericigenes; Oscillibacter valericigenes Sjm18-20	6	8	0
Owenweeksia hongkongensis DSM 17368	Bacteria; Bacteroidetes/Chlorobi group; Bacteroidetes; Flavobacteriia; Flavobacteriales; Cryomorphaceae; Owenweeksia; Owenweeksia hongkongensis; Owenweeksia hongkongensis DSM 17368	5	52	3	3485
Paenibacillus mucilaginosus 3016	Bacteria; Firmicutes; Bacilli; Bacillales; Paenibacillaceae; Paenibacillus; Paenibacillus mucilaginosus; Paenibacillus mucilaginosus 3016	7	13	4	7057
Paenibacillus mucilaginosus K02	Bacteria; Firmicutes; Bacilli; Bacillales; Paenibacillaceae; Paenibacillus; Paenibacillus mucilaginosus; Paenibacillus mucilaginosus K02	9	10	3	7354
Paenibacillus mucilaginosus KNP414	Bacteria; Firmicutes; Bacilli; Bacillales; Paenibacillaceae; Paenibacillus; Paenibacillus mucilaginosus; Paenibacillus mucilaginosus KNP414	8	13	3	7811
Paenibacillus polymyxa E681	Bacteria; Firmicutes; Bacilli; Bacillales; Paenibacillaceae; Paenibacillus; Paenibacillus polymyxa; Paenibacillus polymyxa E681	6	17	1	4805
Paenibacillus polymyxa M1	Bacteria; Firmicutes; Bacilli; Bacillales; Paenibacillaceae; Paenibacillus; Paenibacillus polymyxa; Paenibacillus polymyxa M1	6	12	3	5364
Paenibacillus polymyxa SC2	Bacteria; Firmicutes; Bacilli; Bacillales; Paenibacillaceae; Paenibacillus; Paenibacillus polymyxa; Paenibacillus polymyxa SC2	9	20	3	6032
Paenibacillus sp. JDR-2	Bacteria; Firmicutes; Bacilli; Bacillales; Paenibacillaceae; Paenibacillus; Paenibacillus sp. JDR-2	10	23	3	6213
Paenibacillus sp. Y412MC10	Bacteria; Firmicutes; Bacilli; Bacillales; Paenibacillaceae; Paenibacillus; Paenibacillus sp. Y412MC10	8	21	4	6238
Paenibacillus terrae HPL-003	Bacteria; Firmicutes; Bacilli; Bacillales; Paenibacillaceae; Paenibacillus; Paenibacillus terrae; Paenibacillus terrae HPL-003	7	15	0	5525
Paludibacter propionicigenes WB4	Bacteria; Bacteroidetes/Chlorobi group; Bacteroidetes; Bacteroidia; Bacteroidales; Porphyromonadaceae; Paludibacter; Paludibacter propionicigenes; Paludibacter propionicigenes WB4	3	54	0	3020
Pantoea ananatis AJ13355	Bacteria; Proteobacteria; Gammaproteobacteria; Enterobacteriales; Enterobacteriaceae; Pantoea; Pantoea ananatis; Pantoea ananatis AJ13355	1	13	0	4038
Pantoea ananatis LMG 20103	Bacteria; Proteobacteria; Gammaproteobacteria; Enterobacteriales; Enterobacteriaceae; Pantoea; Pantoea ananatis; Pantoea ananatis LMG 20103	1	15	0	4241
Pantoea ananatis LMG 5342	Bacteria; Proteobacteria; Gammaproteobacteria; Enterobacteriales; Enterobacteriaceae; Pantoea; Pantoea ananatis; Pantoea ananatis LMG 5342	2	13	0
Pantoea ananatis PA13	Bacteria; Proteobacteria; Gammaproteobacteria; Enterobacteriales; Enterobacteriaceae; Pantoea; Pantoea ananatis; Pantoea ananatis PA13	1	13	0	4372
Pantoea sp. At-9b	Bacteria; Proteobacteria; Gammaproteobacteria; Enterobacteriales; Enterobacteriaceae; Pantoea; Pantoea sp. At-9b	1	16	0	5770
Pantoea vagans C9-1	Bacteria; Proteobacteria; Gammaproteobacteria; Enterobacteriales; Enterobacteriaceae; Pantoea; Pantoea vagans; Pantoea vagans C9-1	1	16	0	4590
Parabacteroides distasonis ATCC 8503	Bacteria; Bacteroidetes/Chlorobi group; Bacteroidetes; Bacteroidia; Bacteroidales; Porphyromonadaceae; Parabacteroides; Parabacteroides distasonis; Parabacteroides distasonis ATCC 8503	3	97	0	3849
Parachlamydia acanthamoebae UV-7	Bacteria; Chlamydiae/Verrucomicrobia group; Chlamydiae; Chlamydiia; Chlamydiales; Parachlamydiaceae; Parachlamydia; Parachlamydia acanthamoebae; Parachlamydia acanthamoebae UV-7	5	29	18	2789
Paracoccus denitrificans PD1222	Bacteria; Proteobacteria; Alphaproteobacteria; Rhodobacterales; Rhodobacteraceae; Paracoccus; Paracoccus denitrificans; Paracoccus denitrificans PD1222	1	20	2	5077
Parvibaculum lavamentivorans DS-1	Bacteria; Proteobacteria; Alphaproteobacteria; Rhizobiales; Phyllobacteriaceae; Parvibaculum; Parvibaculum lavamentivorans; Parvibaculum lavamentivorans DS-1	2	24	1	3636
Parvularcula bermudensis HTCC2503	Bacteria; Proteobacteria; Alphaproteobacteria; Parvularculales; Parvularculaceae; Parvularcula; Parvularcula bermudensis; Parvularcula bermudensis HTCC2503	0	19	1	2687
Pasteurella multocida 36950	Bacteria; Proteobacteria; Gammaproteobacteria; Pasteurellales; Pasteurellaceae; Pasteurella; Pasteurella multocida; Pasteurella multocida 36950	0	13	0	2098
Pasteurella multocida subsp. multocida str. 3480	Bacteria; Proteobacteria; Gammaproteobacteria; Pasteurellales; Pasteurellaceae; Pasteurella; Pasteurella multocida; Pasteurella multocida subsp. multocida; Pasteurella multocida subsp. multocida str. 3480	0	13	1	2223
Pasteurella multocida subsp. multocida str. HN06	Bacteria; Proteobacteria; Gammaproteobacteria; Pasteurellales; Pasteurellaceae; Pasteurella; Pasteurella multocida; Pasteurella multocida subsp. multocida; Pasteurella multocida subsp. multocida str. HN06	0	12	1	2265
Pasteurella multocida subsp. multocida str. Pm70	Bacteria; Proteobacteria; Gammaproteobacteria; Pasteurellales; Pasteurellaceae; Pasteurella; Pasteurella multocida; Pasteurella multocida subsp. multocida; Pasteurella multocida subsp. multocida str. Pm70	1	14	1	2012
Pectobacterium atrosepticum SCRI1043	Bacteria; Proteobacteria; Gammaproteobacteria; Enterobacteriales; Enterobacteriaceae; Pectobacterium; Pectobacterium atrosepticum; Pectobacterium atrosepticum SCRI1043	2	17	3	4472
Pectobacterium carotovorum subsp. carotovorum PC1	Bacteria; Proteobacteria; Gammaproteobacteria; Enterobacteriales; Enterobacteriaceae; Pectobacterium; Pectobacterium carotovorum; Pectobacterium carotovorum subsp. carotovorum; Pectobacterium carotovorum subsp. carotovorum PC1	2	18	3	4246
Pectobacterium wasabiae WPP163	Bacteria; Proteobacteria; Gammaproteobacteria; Enterobacteriales; Enterobacteriaceae; Pectobacterium; Pectobacterium wasabiae; Pectobacterium wasabiae WPP163	2	18	10	4437
Pediococcus claussenii ATCC BAA-344	Bacteria; Firmicutes; Bacilli; Lactobacillales; Lactobacillaceae; Pediococcus; Pediococcus claussenii; Pediococcus claussenii ATCC BAA-344	0	2	0	1881
Pediococcus pentosaceus ATCC 25745	Bacteria; Firmicutes; Bacilli; Lactobacillales; Lactobacillaceae; Pediococcus; Pediococcus pentosaceus; Pediococcus pentosaceus ATCC 25745	0	3	0	1755
Pedobacter heparinus DSM 2366	Bacteria; Bacteroidetes/Chlorobi group; Bacteroidetes; Sphingobacteriia; Sphingobacteriales; Sphingobacteriaceae; Pedobacter; Pedobacter heparinus; Pedobacter heparinus DSM 2366	7	130	3	4252
Pedobacter saltans DSM 12145	Bacteria; Bacteroidetes/Chlorobi group; Bacteroidetes; Sphingobacteriia; Sphingobacteriales; Sphingobacteriaceae; Pedobacter; Pedobacter saltans; Pedobacter saltans DSM 12145	7	83	6	3792
Pelagibacterium halotolerans B2	Bacteria; Proteobacteria; Alphaproteobacteria; Rhizobiales; Hyphomicrobiaceae; Pelagibacterium; Pelagibacterium halotolerans; Pelagibacterium halotolerans B2	3	17	0	3881
Pelobacter carbinolicus DSM 2380	Bacteria; Proteobacteria; delta/epsilon subdivisions; Deltaproteobacteria; Desulfuromonadales; Pelobacteraceae; Pelobacter; Pelobacter carbinolicus; Pelobacter carbinolicus DSM 2380	3	29	0	3304
Pelobacter propionicus DSM 2379	Bacteria; Proteobacteria; delta/epsilon subdivisions; Deltaproteobacteria; Desulfuromonadales; Pelobacteraceae; Pelobacter; Pelobacter propionicus; Pelobacter propionicus DSM 2379	4	31	1	3804
Pelodictyon phaeoclathratiforme BU-1	Bacteria; Bacteroidetes/Chlorobi group; Chlorobi; Chlorobia; Chlorobiales; Chlorobiaceae; Chlorobium/Pelodictyon group; Pelodictyon; Pelodictyon phaeoclathratiforme; Pelodictyon phaeoclathratiforme BU-1	2	30	0	2707
Pelotomaculum thermopropionicum SI	Bacteria; Firmicutes; Clostridia; Clostridiales; Peptococcaceae; Pelotomaculum; Pelotomaculum thermopropionicum; Pelotomaculum thermopropionicum SI	1	10	0	2919
Persephonella marina EX-H1	Bacteria; Aquificae; Aquificae; Aquificales; Hydrogenothermaceae; Persephonella; Persephonella marina; Persephonella marina EX-H1	0	20	4	2051
Petrotoga mobilis SJ95	Bacteria; Thermotogae; Thermotogae; Thermotogales; Thermotogaceae; Petrotoga; Petrotoga mobilis; Petrotoga mobilis SJ95	2	12	0	1898
Phaeobacter gallaeciensis 2.10	Bacteria; Proteobacteria; Alphaproteobacteria; Rhodobacterales; Rhodobacteraceae; Phaeobacter; Phaeobacter gallaeciensis; Phaeobacter gallaeciensis 2.10	2	18	1	3723
Phaeobacter gallaeciensis DSM 17395	Bacteria; Proteobacteria; Alphaproteobacteria; Rhodobacterales; Rhodobacteraceae; Phaeobacter; Phaeobacter gallaeciensis; Phaeobacter gallaeciensis DSM 17395	2	19	1	3875
Phenylobacterium zucineum HLK1	Bacteria; Proteobacteria; Alphaproteobacteria; Caulobacterales; Caulobacteraceae; Phenylobacterium; Phenylobacterium zucineum; Phenylobacterium zucineum HLK1	1	32	0	3854
Photobacterium profundum SS9	Bacteria; Proteobacteria; Gammaproteobacteria; Vibrionales; Vibrionaceae; Photobacterium; Photobacterium profundum; Photobacterium profundum SS9	1	34	2	5489
Photorhabdus asymbiotica	Bacteria; Proteobacteria; Gammaproteobacteria; Enterobacteriales; Enterobacteriaceae; Photorhabdus; Photorhabdus asymbiotica	0	15	1	4417
Photorhabdus luminescens subsp. laumondii TTO1	Bacteria; Proteobacteria; Gammaproteobacteria; Enterobacteriales; Enterobacteriaceae; Photorhabdus; Photorhabdus luminescens; Photorhabdus luminescens subsp. laumondii; Photorhabdus luminescens subsp. laumondii TTO1	0	15	2	4683
Phycisphaera mikurensis NBRC 102666	Bacteria; Planctomycetes; Phycisphaerae; Phycisphaerales; Phycisphaeraceae; Phycisphaera; Phycisphaera mikurensis; Phycisphaera mikurensis NBRC 102666	7	21	4	3282
Pirellula staleyi DSM 6068	Bacteria; Planctomycetes; Planctomycetia; Planctomycetales; Planctomycetaceae; Pirellula; Pirellula staleyi; Pirellula staleyi DSM 6068	46	65	2	4717
Planctomyces brasiliensis DSM 5305	Bacteria; Planctomycetes; Planctomycetia; Planctomycetales; Planctomycetaceae; Planctomyces; Planctomyces brasiliensis; Planctomyces brasiliensis DSM 5305	36	60	4	4750
Planctomyces limnophilus DSM 3776	Bacteria; Planctomycetes; Planctomycetia; Planctomycetales; Planctomycetaceae; Planctomyces; Planctomyces limnophilus; Planctomyces limnophilus DSM 3776	32	45	3	4258
Polaromonas naphthalenivorans CJ2	Bacteria; Proteobacteria; Betaproteobacteria; Burkholderiales; Comamonadaceae; Polaromonas; Polaromonas naphthalenivorans; Polaromonas naphthalenivorans CJ2	2	16	4	4929
Polaromonas sp. JS666	Bacteria; Proteobacteria; Betaproteobacteria; Burkholderiales; Comamonadaceae; Polaromonas; Polaromonas sp. JS666	2	26	2	5453
Polymorphum gilvum SL003B-26A1	Bacteria; Proteobacteria; Alphaproteobacteria; unclassified Alphaproteobacteria; Polymorphum; Polymorphum gilvum; Polymorphum gilvum SL003B-26A1	1	18	1	4393
Polynucleobacter necessarius subsp. asymbioticus QLW-P1DMWA-1	Bacteria; Proteobacteria; Betaproteobacteria; Burkholderiales; Burkholderiaceae; Polynucleobacter; Polynucleobacter necessarius; Polynucleobacter necessarius subsp. asymbioticus; Polynucleobacter necessarius subsp. asymbioticus QLW-P1DMWA-1	1	15	1	2077
Polynucleobacter necessarius subsp. necessarius STIR1	Bacteria; Proteobacteria; Betaproteobacteria; Burkholderiales; Burkholderiaceae; Polynucleobacter; Polynucleobacter necessarius; Polynucleobacter necessarius subsp. necessarius; Polynucleobacter necessarius subsp. necessarius STIR1	0	11	0	1508
Porphyromonas asaccharolytica DSM 20707	Bacteria; Bacteroidetes/Chlorobi group; Bacteroidetes; Bacteroidia; Bacteroidales; Porphyromonadaceae; Porphyromonas; Porphyromonas asaccharolytica; Porphyromonas asaccharolytica DSM 20707	2	20	0	1699
Porphyromonas gingivalis ATCC 33277	Bacteria; Bacteroidetes/Chlorobi group; Bacteroidetes; Bacteroidia; Bacteroidales; Porphyromonadaceae; Porphyromonas; Porphyromonas gingivalis; Porphyromonas gingivalis ATCC 33277	3	30	0	2090
Porphyromonas gingivalis TDC60	Bacteria; Bacteroidetes/Chlorobi group; Bacteroidetes; Bacteroidia; Bacteroidales; Porphyromonadaceae; Porphyromonas; Porphyromonas gingivalis; Porphyromonas gingivalis TDC60	3	23	0	2217
Porphyromonas gingivalis W83	Bacteria; Bacteroidetes/Chlorobi group; Bacteroidetes; Bacteroidia; Bacteroidales; Porphyromonadaceae; Porphyromonas; Porphyromonas gingivalis; Porphyromonas gingivalis W83	3	26	0	1909
Prevotella denticola F0289	Bacteria; Bacteroidetes/Chlorobi group; Bacteroidetes; Bacteroidia; Bacteroidales; Prevotellaceae; Prevotella; Prevotella denticola; Prevotella denticola F0289	2	44	0	2386
Prevotella intermedia 17	Bacteria; Bacteroidetes/Chlorobi group; Bacteroidetes; Bacteroidia; Bacteroidales; Prevotellaceae; Prevotella; Prevotella intermedia; Prevotella intermedia 17	2	28	2	2266
Prevotella melaninogenica ATCC 25845	Bacteria; Bacteroidetes/Chlorobi group; Bacteroidetes; Bacteroidia; Bacteroidales; Prevotellaceae; Prevotella; Prevotella melaninogenica; Prevotella melaninogenica ATCC 25845	2	51	2	2296
Prevotella ruminicola 23	Bacteria; Bacteroidetes/Chlorobi group; Bacteroidetes; Bacteroidia; Bacteroidales; Prevotellaceae; Prevotella; Prevotella ruminicola; Prevotella ruminicola 23	3	70	0	2763
Prochlorococcus marinus str. AS9601	Bacteria; Cyanobacteria; Prochlorales; Prochlorococcaceae; Prochlorococcus; Prochlorococcus marinus; Prochlorococcus marinus str. AS9601	1	9	0	1920
Prochlorococcus marinus str. MIT 9211	Bacteria; Cyanobacteria; Prochlorales; Prochlorococcaceae; Prochlorococcus; Prochlorococcus marinus; Prochlorococcus marinus str. MIT 9211	5	10	0	1854
Prochlorococcus marinus str. MIT 9215	Bacteria; Cyanobacteria; Prochlorales; Prochlorococcaceae; Prochlorococcus; Prochlorococcus marinus; Prochlorococcus marinus str. MIT 9215	1	9	0	1982
Prochlorococcus marinus str. MIT 9301	Bacteria; Cyanobacteria; Prochlorales; Prochlorococcaceae; Prochlorococcus; Prochlorococcus marinus; Prochlorococcus marinus str. MIT 9301	1	9	0	1906
Prochlorococcus marinus str. MIT 9303	Bacteria; Cyanobacteria; Prochlorales; Prochlorococcaceae; Prochlorococcus; Prochlorococcus marinus; Prochlorococcus marinus str. MIT 9303	4	41	0	2997
Prochlorococcus marinus str. MIT 9312	Bacteria; Cyanobacteria; Prochlorales; Prochlorococcaceae; Prochlorococcus; Prochlorococcus marinus; Prochlorococcus marinus str. MIT 9312	1	8	0	1810
Prochlorococcus marinus str. MIT 9313	Bacteria; Cyanobacteria; Prochlorales; Prochlorococcaceae; Prochlorococcus; Prochlorococcus marinus; Prochlorococcus marinus str. MIT 9313	5	19	0	2269
Prochlorococcus marinus str. MIT 9515	Bacteria; Cyanobacteria; Prochlorales; Prochlorococcaceae; Prochlorococcus; Prochlorococcus marinus; Prochlorococcus marinus str. MIT 9515	1	6	0	1905
Prochlorococcus marinus str. NATL1A	Bacteria; Cyanobacteria; Prochlorales; Prochlorococcaceae; Prochlorococcus; Prochlorococcus marinus; Prochlorococcus marinus str. NATL1A	4	19	0	2193
Prochlorococcus marinus str. NATL2A	Bacteria; Cyanobacteria; Prochlorales; Prochlorococcaceae; Prochlorococcus; Prochlorococcus marinus; Prochlorococcus marinus str. NATL2A	4	20	0	2162
Prochlorococcus marinus subsp. marinus str. CCMP1375	Bacteria; Cyanobacteria; Prochlorales; Prochlorococcaceae; Prochlorococcus; Prochlorococcus marinus; Prochlorococcus marinus subsp. marinus; Prochlorococcus marinus subsp. marinus str. CCMP1375	6	7	0	1883
Prochlorococcus marinus subsp. pastoris str. CCMP1986	Bacteria; Cyanobacteria; Prochlorales; Prochlorococcaceae; Prochlorococcus; Prochlorococcus marinus; Prochlorococcus marinus subsp. pastoris; Prochlorococcus marinus subsp. pastoris str. CCMP1986	1	7	0	1717
Propionibacterium acnes 266	Bacteria; Actinobacteria; Actinobacteria; Actinobacteridae; Actinomycetales; Propionibacterineae; Propionibacteriaceae; Propionibacterium; Propionibacterium acnes; Propionibacterium acnes 266	0	2	0	2345
Propionibacterium acnes 6609	Bacteria; Actinobacteria; Actinobacteria; Actinobacteridae; Actinomycetales; Propionibacterineae; Propionibacteriaceae; Propionibacterium; Propionibacterium acnes; Propionibacterium acnes 6609	0	2	0	2348
Propionibacterium acnes ATCC 11828	Bacteria; Actinobacteria; Actinobacteria; Actinobacteridae; Actinomycetales; Propionibacterineae; Propionibacteriaceae; Propionibacterium; Propionibacterium acnes; Propionibacterium acnes ATCC 11828	0	2	0	2259
Propionibacterium acnes KPA171202	Bacteria; Actinobacteria; Actinobacteria; Actinobacteridae; Actinomycetales; Propionibacterineae; Propionibacteriaceae; Propionibacterium; Propionibacterium acnes; Propionibacterium acnes KPA171202	0	2	0	2297
Propionibacterium acnes SK137	Bacteria; Actinobacteria; Actinobacteria; Actinobacteridae; Actinomycetales; Propionibacterineae; Propionibacteriaceae; Propionibacterium; Propionibacterium acnes; Propionibacterium acnes SK137	0	2	0	2352
Propionibacterium acnes TypeIA2 P.acn17	Bacteria; Actinobacteria; Actinobacteria; Actinobacteridae; Actinomycetales; Propionibacterineae; Propionibacteriaceae; Propionibacterium; Propionibacterium acnes; Propionibacterium acnes TypeIA2 P.acn17	0	2	0	2263
Propionibacterium acnes TypeIA2 P.acn31	Bacteria; Actinobacteria; Actinobacteria; Actinobacteridae; Actinomycetales; Propionibacterineae; Propionibacteriaceae; Propionibacterium; Propionibacterium acnes; Propionibacterium acnes TypeIA2 P.acn31	0	2	0	2244
Propionibacterium acnes TypeIA2 P.acn33	Bacteria; Actinobacteria; Actinobacteria; Actinobacteridae; Actinomycetales; Propionibacterineae; Propionibacteriaceae; Propionibacterium; Propionibacterium acnes; Propionibacterium acnes TypeIA2 P.acn33	0	2	0	2233
Propionibacterium freudenreichii subsp. shermanii CIRM-BIA1	Bacteria; Actinobacteria; Actinobacteria; Actinobacteridae; Actinomycetales; Propionibacterineae; Propionibacteriaceae; Propionibacterium; Propionibacterium freudenreichii; Propionibacterium freudenreichii subsp. shermanii; Propionibacterium freudenreichii subsp. shermanii CIRM-BIA1	0	1	0	2375
Propionibacterium propionicum F0230a	Bacteria; Actinobacteria; Actinobacteria; Actinobacteridae; Actinomycetales; Propionibacterineae; Propionibacteriaceae; Propionibacterium; Propionibacterium propionicum; Propionibacterium propionicum F0230a	1	10	1	2938
Prosthecochloris aestuarii DSM 271	Bacteria; Bacteroidetes/Chlorobi group; Chlorobi; Chlorobia; Chlorobiales; Chlorobiaceae; Prosthecochloris; Prosthecochloris aestuarii; Prosthecochloris aestuarii DSM 271	1	22	0	2327
Proteus mirabilis HI4320	Bacteria; Proteobacteria; Gammaproteobacteria; Enterobacteriales; Enterobacteriaceae; Proteus; Proteus mirabilis; Proteus mirabilis HI4320	1	15	0	3662
Providencia stuartii MRSN 2154	Bacteria; Proteobacteria; Gammaproteobacteria; Enterobacteriales; Enterobacteriaceae; Providencia; Providencia stuartii; Providencia stuartii MRSN 2154	6	16	3	4099
Pseudoalteromonas atlantica T6c	Bacteria; Proteobacteria; Gammaproteobacteria; Alteromonadales; Pseudoalteromonadaceae; Pseudoalteromonas; Pseudoalteromonas atlantica; Pseudoalteromonas atlantica T6c	1	41	1	4281
Pseudoalteromonas haloplanktis TAC125	Bacteria; Proteobacteria; Gammaproteobacteria; Alteromonadales; Pseudoalteromonadaceae; Pseudoalteromonas; Pseudoalteromonas haloplanktis; Pseudoalteromonas haloplanktis TAC125	1	27	2	3485
Pseudoalteromonas sp. SM9913	Bacteria; Proteobacteria; Gammaproteobacteria; Alteromonadales; Pseudoalteromonadaceae; Pseudoalteromonas; Pseudoalteromonas sp. SM9913	1	30	1	3712
Pseudogulbenkiania sp. NH8B	Bacteria; Proteobacteria; Betaproteobacteria; Neisseriales; Neisseriaceae; Pseudogulbenkiania; Pseudogulbenkiania sp. NH8B	0	18	0	4012
Pseudomonas aeruginosa DK2	Bacteria; Proteobacteria; Gammaproteobacteria; Pseudomonadales; Pseudomonadaceae; Pseudomonas; Pseudomonas aeruginosa group; Pseudomonas aeruginosa; Pseudomonas aeruginosa DK2	3	24	3	5884
Pseudomonas aeruginosa LESB58	Bacteria; Proteobacteria; Gammaproteobacteria; Pseudomonadales; Pseudomonadaceae; Pseudomonas; Pseudomonas aeruginosa group; Pseudomonas aeruginosa; Pseudomonas aeruginosa LESB58	2	24	3	5925
Pseudomonas aeruginosa M18	Bacteria; Proteobacteria; Gammaproteobacteria; Pseudomonadales; Pseudomonadaceae; Pseudomonas; Pseudomonas aeruginosa group; Pseudomonas aeruginosa; Pseudomonas aeruginosa M18	3	24	3	5684
Pseudomonas aeruginosa NCGM2.S1	Bacteria; Proteobacteria; Gammaproteobacteria; Pseudomonadales; Pseudomonadaceae; Pseudomonas; Pseudomonas aeruginosa group; Pseudomonas aeruginosa; Pseudomonas aeruginosa NCGM2.S1	3	23	3	6269
Pseudomonas aeruginosa PA7	Bacteria; Proteobacteria; Gammaproteobacteria; Pseudomonadales; Pseudomonadaceae; Pseudomonas; Pseudomonas aeruginosa group; Pseudomonas aeruginosa; Pseudomonas aeruginosa PA7	4	26	3	6286
Pseudomonas aeruginosa PAO1	Bacteria; Proteobacteria; Gammaproteobacteria; Pseudomonadales; Pseudomonadaceae; Pseudomonas; Pseudomonas aeruginosa group; Pseudomonas aeruginosa; Pseudomonas aeruginosa PAO1	2	24	3	5571
Pseudomonas aeruginosa UCBPP-PA14	Bacteria; Proteobacteria; Gammaproteobacteria; Pseudomonadales; Pseudomonadaceae; Pseudomonas; Pseudomonas aeruginosa group; Pseudomonas aeruginosa; Pseudomonas aeruginosa UCBPP-PA14	3	23	3	5892
Pseudomonas brassicacearum subsp. brassicacearum NFM421	Bacteria; Proteobacteria; Gammaproteobacteria; Pseudomonadales; Pseudomonadaceae; Pseudomonas; Pseudomonas brassicacearum; Pseudomonas brassicacearum subsp. brassicacearum; Pseudomonas brassicacearum subsp. brassicacearum NFM421	4	31	2	6095
Pseudomonas entomophila L48	Bacteria; Proteobacteria; Gammaproteobacteria; Pseudomonadales; Pseudomonadaceae; Pseudomonas; Pseudomonas entomophila; Pseudomonas entomophila L48	4	27	2	5134
Pseudomonas fluorescens A506	Bacteria; Proteobacteria; Gammaproteobacteria; Pseudomonadales; Pseudomonadaceae; Pseudomonas; Pseudomonas fluorescens group; Pseudomonas fluorescens; Pseudomonas fluorescens A506	1	21	2	5334
Pseudomonas fluorescens F113	Bacteria; Proteobacteria; Gammaproteobacteria; Pseudomonadales; Pseudomonadaceae; Pseudomonas; Pseudomonas fluorescens group; Pseudomonas fluorescens; Pseudomonas fluorescens F113	4	31	2	5862
Pseudomonas fluorescens Pf0-1	Bacteria; Proteobacteria; Gammaproteobacteria; Pseudomonadales; Pseudomonadaceae; Pseudomonas; Pseudomonas fluorescens group; Pseudomonas fluorescens; Pseudomonas fluorescens Pf0-1	4	31	1	5722
Pseudomonas fluorescens SBW25	Bacteria; Proteobacteria; Gammaproteobacteria; Pseudomonadales; Pseudomonadaceae; Pseudomonas; Pseudomonas fluorescens group; Pseudomonas fluorescens; Pseudomonas fluorescens SBW25	3	26	3	5921
Pseudomonas fulva 12-X	Bacteria; Proteobacteria; Gammaproteobacteria; Pseudomonadales; Pseudomonadaceae; Pseudomonas; Pseudomonas putida group; Pseudomonas fulva; Pseudomonas fulva 12-X	2	25	2	4461
Pseudomonas mendocina NK-01	Bacteria; Proteobacteria; Gammaproteobacteria; Pseudomonadales; Pseudomonadaceae; Pseudomonas; Pseudomonas aeruginosa group; Pseudomonas mendocina; Pseudomonas mendocina NK-01	1	25	0	4958
Pseudomonas mendocina ymp	Bacteria; Proteobacteria; Gammaproteobacteria; Pseudomonadales; Pseudomonadaceae; Pseudomonas; Pseudomonas aeruginosa group; Pseudomonas mendocina; Pseudomonas mendocina ymp	3	27	0	4594
Pseudomonas protegens Pf-5	Bacteria; Proteobacteria; Gammaproteobacteria; Pseudomonadales; Pseudomonadaceae; Pseudomonas; Pseudomonas fluorescens group; Pseudomonas protegens; Pseudomonas protegens Pf-5	8	27	5	6108
Pseudomonas putida BIRD-1	Bacteria; Proteobacteria; Gammaproteobacteria; Pseudomonadales; Pseudomonadaceae; Pseudomonas; Pseudomonas putida group; Pseudomonas putida; Pseudomonas putida BIRD-1	2	24	1	4960
Pseudomonas putida DOT-T1E	Bacteria; Proteobacteria; Gammaproteobacteria; Pseudomonadales; Pseudomonadaceae; Pseudomonas; Pseudomonas putida group; Pseudomonas putida; Pseudomonas putida DOT-T1E	1	28	1	5721
Pseudomonas putida F1	Bacteria; Proteobacteria; Gammaproteobacteria; Pseudomonadales; Pseudomonadaceae; Pseudomonas; Pseudomonas putida group; Pseudomonas putida; Pseudomonas putida F1	2	23	1	5250
Pseudomonas putida GB-1	Bacteria; Proteobacteria; Gammaproteobacteria; Pseudomonadales; Pseudomonadaceae; Pseudomonas; Pseudomonas putida group; Pseudomonas putida; Pseudomonas putida GB-1	1	25	2	5408
Pseudomonas putida KT2440	Bacteria; Proteobacteria; Gammaproteobacteria; Pseudomonadales; Pseudomonadaceae; Pseudomonas; Pseudomonas putida group; Pseudomonas putida; Pseudomonas putida KT2440	2	25	1	5350
Pseudomonas putida ND6	Bacteria; Proteobacteria; Gammaproteobacteria; Pseudomonadales; Pseudomonadaceae; Pseudomonas; Pseudomonas putida group; Pseudomonas putida; Pseudomonas putida ND6	2	24	1	6391
Pseudomonas putida S16	Bacteria; Proteobacteria; Gammaproteobacteria; Pseudomonadales; Pseudomonadaceae; Pseudomonas; Pseudomonas putida group; Pseudomonas putida; Pseudomonas putida S16	3	25	2	5218
Pseudomonas putida W619	Bacteria; Proteobacteria; Gammaproteobacteria; Pseudomonadales; Pseudomonadaceae; Pseudomonas; Pseudomonas putida group; Pseudomonas putida; Pseudomonas putida W619	3	30	2	5182
Pseudomonas stutzeri A1501	Bacteria; Proteobacteria; Gammaproteobacteria; Pseudomonadales; Pseudomonadaceae; Pseudomonas; Pseudomonas stutzeri group; Pseudomonas stutzeri subgroup; Pseudomonas stutzeri; Pseudomonas stutzeri A1501	3	21	2	4127
Pseudomonas stutzeri ATCC 17588 = LMG 11199	Bacteria; Proteobacteria; Gammaproteobacteria; Pseudomonadales; Pseudomonadaceae; Pseudomonas; Pseudomonas stutzeri group; Pseudomonas stutzeri subgroup; Pseudomonas stutzeri; Pseudomonas stutzeri ATCC 17588 = LMG 11199	2	21	3	4217
Pseudomonas stutzeri CCUG 29243	Bacteria; Proteobacteria; Gammaproteobacteria; Pseudomonadales; Pseudomonadaceae; Pseudomonas; Pseudomonas stutzeri group; Pseudomonas stutzeri subgroup; Pseudomonas stutzeri; Pseudomonas stutzeri CCUG 29243	3	23	1	4300
Pseudomonas stutzeri DSM 10701	Bacteria; Proteobacteria; Gammaproteobacteria; Pseudomonadales; Pseudomonadaceae; Pseudomonas; Pseudomonas stutzeri group; Pseudomonas stutzeri subgroup; Pseudomonas stutzeri; Pseudomonas stutzeri DSM 10701	2	20	2	3815
Pseudomonas stutzeri DSM 4166	Bacteria; Proteobacteria; Gammaproteobacteria; Pseudomonadales; Pseudomonadaceae; Pseudomonas; Pseudomonas stutzeri group; Pseudomonas stutzeri subgroup; Pseudomonas stutzeri; Pseudomonas stutzeri DSM 4166	4	21	2	4301
Pseudomonas syringae pv. phaseolicola 1448A	Bacteria; Proteobacteria; Gammaproteobacteria; Pseudomonadales; Pseudomonadaceae; Pseudomonas; Pseudomonas syringae group; Pseudomonas syringae group genomosp. 2; Pseudomonas savastanoi; Pseudomonas syringae pv. phaseolicola; Pseudomonas syringae pv. phaseolicola 1448A	4	20	2	5172
Pseudomonas syringae pv. syringae B728a	Bacteria; Proteobacteria; Gammaproteobacteria; Pseudomonadales; Pseudomonadaceae; Pseudomonas; Pseudomonas syringae group; Pseudomonas syringae group genomosp. 1; Pseudomonas syringae; Pseudomonas syringae pv. syringae; Pseudomonas syringae pv. syringae B728a	3	19	3	5089
Pseudomonas syringae pv. tomato str. DC3000	Bacteria; Proteobacteria; Gammaproteobacteria; Pseudomonadales; Pseudomonadaceae; Pseudomonas; Pseudomonas syringae group; Pseudomonas syringae group genomosp. 3; Pseudomonas syringae pv. tomato; Pseudomonas syringae pv. tomato str. DC3000	2	19	2	5619
Pseudonocardia dioxanivorans CB1190	Bacteria; Actinobacteria; Actinobacteria; Actinobacteridae; Actinomycetales; Pseudonocardineae; Pseudonocardiaceae; Pseudonocardia; Pseudonocardia dioxanivorans; Pseudonocardia dioxanivorans CB1190	4	36	1	6736
Pseudovibrio sp. FO-BEG1	Bacteria; Proteobacteria; Alphaproteobacteria; Rhodobacterales; Rhodobacteraceae; Pseudovibrio; Pseudovibrio sp. FO-BEG1	4	26	4	5468
Pseudoxanthomonas spadix BD-a59	Bacteria; Proteobacteria; Gammaproteobacteria; Xanthomonadales; Xanthomonadaceae; Pseudoxanthomonas; Pseudoxanthomonas spadix; Pseudoxanthomonas spadix BD-a59	2	23	4	3149
Pseudoxanthomonas suwonensis 11-1	Bacteria; Proteobacteria; Gammaproteobacteria; Xanthomonadales; Xanthomonadaceae; Pseudoxanthomonas; Pseudoxanthomonas suwonensis; Pseudoxanthomonas suwonensis 11-1	1	26	1	3070
Psychrobacter arcticus 273-4	Bacteria; Proteobacteria; Gammaproteobacteria; Pseudomonadales; Moraxellaceae; Psychrobacter; Psychrobacter arcticus; Psychrobacter arcticus 273-4	0	13	0	2120
Psychrobacter cryohalolentis K5	Bacteria; Proteobacteria; Gammaproteobacteria; Pseudomonadales; Moraxellaceae; Psychrobacter; Psychrobacter cryohalolentis; Psychrobacter cryohalolentis K5	0	14	0	2511
Psychrobacter sp. PRwf-1	Bacteria; Proteobacteria; Gammaproteobacteria; Pseudomonadales; Moraxellaceae; Psychrobacter; Psychrobacter sp. PRwf-1	0	11	0	2385
Psychromonas ingrahamii 37	Bacteria; Proteobacteria; Gammaproteobacteria; Alteromonadales; Psychromonadaceae; Psychromonas; Psychromonas ingrahamii; Psychromonas ingrahamii 37	2	22	0	3545
Pusillimonas sp. T7-7	Bacteria; Proteobacteria; Betaproteobacteria; Burkholderiales; Alcaligenaceae; Pusillimonas; Pusillimonas sp. T7-7	0	16	2	3773
Rahnella aquatilis CIP 78.65 = ATCC 33071	Bacteria; Proteobacteria; Gammaproteobacteria; Enterobacteriales; Enterobacteriaceae; Rahnella; Rahnella aquatilis; Rahnella aquatilis CIP 78.65 = ATCC 33071	1	17	0	4866
Rahnella aquatilis HX2	Bacteria; Proteobacteria; Gammaproteobacteria; Enterobacteriales; Enterobacteriaceae; Rahnella; Rahnella aquatilis; Rahnella aquatilis HX2	2	17	0	5082
Rahnella sp. Y9602	Bacteria; Proteobacteria; Gammaproteobacteria; Enterobacteriales; Enterobacteriaceae; Rahnella; Rahnella sp. Y9602	2	17	0	5111
Ralstonia eutropha H16	Bacteria; Proteobacteria; Betaproteobacteria; Burkholderiales; Burkholderiaceae; Cupriavidus; Cupriavidus necator; Ralstonia eutropha H16	3	32	3	6626
Ralstonia eutropha JMP134	Bacteria; Proteobacteria; Betaproteobacteria; Burkholderiales; Burkholderiaceae; Cupriavidus; Cupriavidus pinatubonensis; Ralstonia eutropha JMP134	2	30	3	6446
Ralstonia pickettii 12D	Bacteria; Proteobacteria; Betaproteobacteria; Burkholderiales; Burkholderiaceae; Ralstonia; Ralstonia pickettii; Ralstonia pickettii 12D	1	19	2	5361
Ralstonia pickettii 12J	Bacteria; Proteobacteria; Betaproteobacteria; Burkholderiales; Burkholderiaceae; Ralstonia; Ralstonia pickettii; Ralstonia pickettii 12J	1	19	2	4952
Ralstonia solanacearum CFBP2957	Bacteria; Proteobacteria; Betaproteobacteria; Burkholderiales; Burkholderiaceae; Ralstonia; Ralstonia solanacearum; Ralstonia solanacearum CFBP2957	2	15	3	5011
Ralstonia solanacearum GMI1000	Bacteria; Proteobacteria; Betaproteobacteria; Burkholderiales; Burkholderiaceae; Ralstonia; Ralstonia solanacearum; Ralstonia solanacearum GMI1000	8	23	5	5113
Ralstonia solanacearum Po82	Bacteria; Proteobacteria; Betaproteobacteria; Burkholderiales; Burkholderiaceae; Ralstonia; Ralstonia solanacearum; Ralstonia solanacearum Po82	7	27	5	5016
Ralstonia solanacearum PSI07	Bacteria; Proteobacteria; Betaproteobacteria; Burkholderiales; Burkholderiaceae; Ralstonia; Ralstonia solanacearum; Ralstonia solanacearum PSI07	9	22	8	5000
Ramlibacter tataouinensis TTB310	Bacteria; Proteobacteria; Betaproteobacteria; Burkholderiales; Comamonadaceae; Ramlibacter; Ramlibacter tataouinensis; Ramlibacter tataouinensis TTB310	2	14	3	3880
Renibacterium salmoninarum ATCC 33209	Bacteria; Actinobacteria; Actinobacteria; Actinobacteridae; Actinomycetales; Micrococcineae; Micrococcaceae; Renibacterium; Renibacterium salmoninarum; Renibacterium salmoninarum ATCC 33209	1	7	0	3507
Rhizobium etli CFN 42	Bacteria; Proteobacteria; Alphaproteobacteria; Rhizobiales; Rhizobiaceae; Rhizobium/Agrobacterium group; Rhizobium; Rhizobium etli; Rhizobium etli CFN 42	2	35	0	5963
Rhizobium etli CIAT 652	Bacteria; Proteobacteria; Alphaproteobacteria; Rhizobiales; Rhizobiaceae; Rhizobium/Agrobacterium group; Rhizobium; Rhizobium etli; Rhizobium etli CIAT 652	3	34	0	6056
Rhizobium leguminosarum bv. trifolii WSM1325	Bacteria; Proteobacteria; Alphaproteobacteria; Rhizobiales; Rhizobiaceae; Rhizobium/Agrobacterium group; Rhizobium; Rhizobium leguminosarum; Rhizobium leguminosarum bv. trifolii; Rhizobium leguminosarum bv. trifolii WSM1325	3	47	3	7001
Rhizobium leguminosarum bv. trifolii WSM2304	Bacteria; Proteobacteria; Alphaproteobacteria; Rhizobiales; Rhizobiaceae; Rhizobium/Agrobacterium group; Rhizobium; Rhizobium leguminosarum; Rhizobium leguminosarum bv. trifolii; Rhizobium leguminosarum bv. trifolii WSM2304	2	40	0	6415
Rhizobium leguminosarum bv. viciae 3841	Bacteria; Proteobacteria; Alphaproteobacteria; Rhizobiales; Rhizobiaceae; Rhizobium/Agrobacterium group; Rhizobium; Rhizobium leguminosarum; Rhizobium leguminosarum bv. viciae; Rhizobium leguminosarum bv. viciae 3841	4	46	1	7143
Rhodobacter capsulatus SB 1003	Bacteria; Proteobacteria; Alphaproteobacteria; Rhodobacterales; Rhodobacteraceae; Rhodobacter; Rhodobacter capsulatus; Rhodobacter capsulatus SB 1003	2	15	0	3642
Rhodobacter sphaeroides 2.4.1	Bacteria; Proteobacteria; Alphaproteobacteria; Rhodobacterales; Rhodobacteraceae; Rhodobacter; Rhodobacter sphaeroides; Rhodobacter sphaeroides 2.4.1	1	15	0	4242
Rhodobacter sphaeroides ATCC 17025	Bacteria; Proteobacteria; Alphaproteobacteria; Rhodobacterales; Rhodobacteraceae; Rhodobacter; Rhodobacter sphaeroides; Rhodobacter sphaeroides ATCC 17025	1	15	0	4333
Rhodobacter sphaeroides ATCC 17029	Bacteria; Proteobacteria; Alphaproteobacteria; Rhodobacterales; Rhodobacteraceae; Rhodobacter; Rhodobacter sphaeroides; Rhodobacter sphaeroides ATCC 17029	1	15	0	4131
Rhodobacter sphaeroides KD131	Bacteria; Proteobacteria; Alphaproteobacteria; Rhodobacterales; Rhodobacteraceae; Rhodobacter; Rhodobacter sphaeroides; Rhodobacter sphaeroides KD131	2	17	0	4569
Rhodococcus equi 103S	Bacteria; Actinobacteria; Actinobacteria; Actinobacteridae; Actinomycetales; Corynebacterineae; Nocardiaceae; Rhodococcus; Rhodococcus equi; Rhodococcus equi 103S	5	7	2	4512
Rhodococcus erythropolis PR4	Bacteria; Actinobacteria; Actinobacteria; Actinobacteridae; Actinomycetales; Corynebacterineae; Nocardiaceae; Rhodococcus; Rhodococcus erythropolis; Rhodococcus erythropolis PR4	7	11	2	6433
Rhodococcus jostii RHA1	Bacteria; Actinobacteria; Actinobacteria; Actinobacteridae; Actinomycetales; Corynebacterineae; Nocardiaceae; Rhodococcus; Rhodococcus jostii; Rhodococcus jostii RHA1	5	42	2	9145
Rhodococcus opacus B4	Bacteria; Actinobacteria; Actinobacteria; Actinobacteridae; Actinomycetales; Corynebacterineae; Nocardiaceae; Rhodococcus; Rhodococcus opacus; Rhodococcus opacus B4	7	28	1	8197
Rhodoferax ferrireducens T118	Bacteria; Proteobacteria; Betaproteobacteria; Burkholderiales; Comamonadaceae; Albidiferax; Albidiferax ferrireducens; Rhodoferax ferrireducens T118	2	25	2	4417
Rhodomicrobium vannielii ATCC 17100	Bacteria; Proteobacteria; Alphaproteobacteria; Rhizobiales; Hyphomicrobiaceae; Rhodomicrobium; Rhodomicrobium vannielii; Rhodomicrobium vannielii ATCC 17100	3	23	0	3565
Rhodopirellula baltica SH 1	Bacteria; Planctomycetes; Planctomycetia; Planctomycetales; Planctomycetaceae; Rhodopirellula; Rhodopirellula baltica; Rhodopirellula baltica SH 1	23	72	9	7325
Rhodopseudomonas palustris BisA53	Bacteria; Proteobacteria; Alphaproteobacteria; Rhizobiales; Bradyrhizobiaceae; Rhodopseudomonas; Rhodopseudomonas palustris; Rhodopseudomonas palustris BisA53	4	26	0	4878
Rhodopseudomonas palustris BisB18	Bacteria; Proteobacteria; Alphaproteobacteria; Rhizobiales; Bradyrhizobiaceae; Rhodopseudomonas; Rhodopseudomonas palustris; Rhodopseudomonas palustris BisB18	5	15	0	4886
Rhodopseudomonas palustris BisB5	Bacteria; Proteobacteria; Alphaproteobacteria; Rhizobiales; Bradyrhizobiaceae; Rhodopseudomonas; Rhodopseudomonas palustris; Rhodopseudomonas palustris BisB5	4	26	0	4397
Rhodopseudomonas palustris CGA009	Bacteria; Proteobacteria; Alphaproteobacteria; Rhizobiales; Bradyrhizobiaceae; Rhodopseudomonas; Rhodopseudomonas palustris; Rhodopseudomonas palustris CGA009	4	23	0	4820
Rhodopseudomonas palustris DX-1	Bacteria; Proteobacteria; Alphaproteobacteria; Rhizobiales; Bradyrhizobiaceae; Rhodopseudomonas; Rhodopseudomonas palustris; Rhodopseudomonas palustris DX-1	3	19	0	4917
Rhodopseudomonas palustris HaA2	Bacteria; Proteobacteria; Alphaproteobacteria; Rhizobiales; Bradyrhizobiaceae; Rhodopseudomonas; Rhodopseudomonas palustris; Rhodopseudomonas palustris HaA2	3	21	0	4683
Rhodopseudomonas palustris TIE-1	Bacteria; Proteobacteria; Alphaproteobacteria; Rhizobiales; Bradyrhizobiaceae; Rhodopseudomonas; Rhodopseudomonas palustris; Rhodopseudomonas palustris TIE-1	5	27	1	5246
Rhodospirillum centenum SW	Bacteria; Proteobacteria; Alphaproteobacteria; Rhodospirillales; Rhodospirillaceae; Rhodospirillum; Rhodospirillum centenum; Rhodospirillum centenum SW	4	23	1	4003
Rhodospirillum photometricum DSM 122	Bacteria; Proteobacteria; Alphaproteobacteria; Rhodospirillales; Rhodospirillaceae; Rhodospirillum; Rhodospirillum photometricum; Rhodospirillum photometricum DSM 122	5	25	2	3281
Rhodospirillum rubrum ATCC 11170	Bacteria; Proteobacteria; Alphaproteobacteria; Rhodospirillales; Rhodospirillaceae; Rhodospirillum; Rhodospirillum rubrum; Rhodospirillum rubrum ATCC 11170	3	36	0	3838
Rhodospirillum rubrum F11	Bacteria; Proteobacteria; Alphaproteobacteria; Rhodospirillales; Rhodospirillaceae; Rhodospirillum; Rhodospirillum rubrum; Rhodospirillum rubrum F11	3	36	0	3878
Rhodothermus marinus DSM 4252	Bacteria; Bacteroidetes/Chlorobi group; Bacteroidetes; Bacteroidetes Order II. Incertae sedis; Rhodothermaceae; Rhodothermus; Rhodothermus marinus; Rhodothermus marinus DSM 4252	3	50	0	2863
Rhodothermus marinus SG0.5JP17-172	Bacteria; Bacteroidetes/Chlorobi group; Bacteroidetes; Bacteroidetes Order II. Incertae sedis; Rhodothermaceae; Rhodothermus; Rhodothermus marinus; Rhodothermus marinus SG0.5JP17-172	4	41	0	2838
Rickettsia africae ESF-5	Bacteria; Proteobacteria; Alphaproteobacteria; Rickettsiales; Rickettsiaceae; Rickettsieae; Rickettsia; spotted fever group; Rickettsia africae; Rickettsia africae ESF-5	2	5	4	1041
Rickettsia akari str. Hartford	Bacteria; Proteobacteria; Alphaproteobacteria; Rickettsiales; Rickettsiaceae; Rickettsieae; Rickettsia; spotted fever group; Rickettsia akari; Rickettsia akari str. Hartford	2	4	7	1258
Rickettsia australis str. Cutlack	Bacteria; Proteobacteria; Alphaproteobacteria; Rickettsiales; Rickettsiaceae; Rickettsieae; Rickettsia; spotted fever group; Rickettsia australis; Rickettsia australis str. Cutlack	1	6	7	1261
Rickettsia bellii OSU 85-389	Bacteria; Proteobacteria; Alphaproteobacteria; Rickettsiales; Rickettsiaceae; Rickettsieae; Rickettsia; belli group; Rickettsia bellii; Rickettsia bellii OSU 85-389	4	14	28	1475
Rickettsia bellii RML369-C	Bacteria; Proteobacteria; Alphaproteobacteria; Rickettsiales; Rickettsiaceae; Rickettsieae; Rickettsia; belli group; Rickettsia bellii; Rickettsia bellii RML369-C	3	18	27	1429
Rickettsia canadensis str. CA410	Bacteria; Proteobacteria; Alphaproteobacteria; Rickettsiales; Rickettsiaceae; Rickettsieae; Rickettsia; typhus group; Rickettsia canadensis; Rickettsia canadensis str. CA410	0	3	4	1016
Rickettsia canadensis str. McKiel	Bacteria; Proteobacteria; Alphaproteobacteria; Rickettsiales; Rickettsiaceae; Rickettsieae; Rickettsia; typhus group; Rickettsia canadensis; Rickettsia canadensis str. McKiel	0	4	4	1090
Rickettsia conorii str. Malish 7	Bacteria; Proteobacteria; Alphaproteobacteria; Rickettsiales; Rickettsiaceae; Rickettsieae; Rickettsia; spotted fever group; Rickettsia conorii; Rickettsia conorii str. Malish 7	2	10	6	1374
Rickettsia felis URRWXCal2	Bacteria; Proteobacteria; Alphaproteobacteria; Rickettsiales; Rickettsiaceae; Rickettsieae; Rickettsia; spotted fever group; Rickettsia felis; Rickettsia felis URRWXCal2	7	19	24	1512
Rickettsia heilongjiangensis 054	Bacteria; Proteobacteria; Alphaproteobacteria; Rickettsiales; Rickettsiaceae; Rickettsieae; Rickettsia; spotted fever group; Rickettsia heilongjiangensis; Rickettsia heilongjiangensis 054	3	6	11	1297
Rickettsia japonica YH	Bacteria; Proteobacteria; Alphaproteobacteria; Rickettsiales; Rickettsiaceae; Rickettsieae; Rickettsia; spotted fever group; Rickettsia japonica; Rickettsia japonica YH	3	4	8	971
Rickettsia massiliae MTU5	Bacteria; Proteobacteria; Alphaproteobacteria; Rickettsiales; Rickettsiaceae; Rickettsieae; Rickettsia; spotted fever group; Rickettsia massiliae; Rickettsia massiliae MTU5	1	6	5	980
Rickettsia massiliae str. AZT80	Bacteria; Proteobacteria; Alphaproteobacteria; Rickettsiales; Rickettsiaceae; Rickettsieae; Rickettsia; spotted fever group; Rickettsia massiliae; Rickettsia massiliae str. AZT80	2	6	6	1207
Rickettsia montanensis str. OSU 85-930	Bacteria; Proteobacteria; Alphaproteobacteria; Rickettsiales; Rickettsiaceae; Rickettsieae; Rickettsia; spotted fever group; Rickettsia montanensis; Rickettsia montanensis str. OSU 85-930	1	10	6	1217
Rickettsia parkeri str. Portsmouth	Bacteria; Proteobacteria; Alphaproteobacteria; Rickettsiales; Rickettsiaceae; Rickettsieae; Rickettsia; spotted fever group; Rickettsia parkeri; Rickettsia parkeri str. Portsmouth	2	8	9	1318
Rickettsia peacockii str. Rustic	Bacteria; Proteobacteria; Alphaproteobacteria; Rickettsiales; Rickettsiaceae; Rickettsieae; Rickettsia; spotted fever group; Rickettsia peacockii; Rickettsia peacockii str. Rustic	1	5	3	947
Rickettsia philipii str. 364D	Bacteria; Proteobacteria; Alphaproteobacteria; Rickettsiales; Rickettsiaceae; Rickettsieae; Rickettsia; spotted fever group; Rickettsia philipii; Rickettsia philipii str. 364D	1	10	8	1344
Rickettsia prowazekii Rp22	Bacteria; Proteobacteria; Alphaproteobacteria; Rickettsiales; Rickettsiaceae; Rickettsieae; Rickettsia; typhus group; Rickettsia prowazekii; Rickettsia prowazekii Rp22	0	4	3	950
Rickettsia prowazekii str. BuV67-CWPP	Bacteria; Proteobacteria; Alphaproteobacteria; Rickettsiales; Rickettsiaceae; Rickettsieae; Rickettsia; typhus group; Rickettsia prowazekii; Rickettsia prowazekii str. BuV67-CWPP	0	4	3	843
Rickettsia prowazekii str. Chernikova	Bacteria; Proteobacteria; Alphaproteobacteria; Rickettsiales; Rickettsiaceae; Rickettsieae; Rickettsia; typhus group; Rickettsia prowazekii; Rickettsia prowazekii str. Chernikova	0	4	3	845
Rickettsia prowazekii str. Dachau	Bacteria; Proteobacteria; Alphaproteobacteria; Rickettsiales; Rickettsiaceae; Rickettsieae; Rickettsia; typhus group; Rickettsia prowazekii; Rickettsia prowazekii str. Dachau	0	4	3	839
Rickettsia prowazekii str. GvV257	Bacteria; Proteobacteria; Alphaproteobacteria; Rickettsiales; Rickettsiaceae; Rickettsieae; Rickettsia; typhus group; Rickettsia prowazekii; Rickettsia prowazekii str. GvV257	0	4	1	829
Rickettsia prowazekii str. Katsinyian	Bacteria; Proteobacteria; Alphaproteobacteria; Rickettsiales; Rickettsiaceae; Rickettsieae; Rickettsia; typhus group; Rickettsia prowazekii; Rickettsia prowazekii str. Katsinyian	0	4	3	844
Rickettsia prowazekii str. Madrid E	Bacteria; Proteobacteria; Alphaproteobacteria; Rickettsiales; Rickettsiaceae; Rickettsieae; Rickettsia; typhus group; Rickettsia prowazekii; Rickettsia prowazekii str. Madrid E	0	4	3	835
Rickettsia prowazekii str. RpGvF24	Bacteria; Proteobacteria; Alphaproteobacteria; Rickettsiales; Rickettsiaceae; Rickettsieae; Rickettsia; typhus group; Rickettsia prowazekii; Rickettsia prowazekii str. RpGvF24	0	4	1	834
Rickettsia rhipicephali str. 3-7-female6-CWPP	Bacteria; Proteobacteria; Alphaproteobacteria; Rickettsiales; Rickettsiaceae; Rickettsieae; Rickettsia; spotted fever group; Rickettsia rhipicephali; Rickettsia rhipicephali str. 3-7-female6-CWPP	1	9	7	1266
Rickettsia rickettsii str. 'Sheila Smith'	Bacteria; Proteobacteria; Alphaproteobacteria; Rickettsiales; Rickettsiaceae; Rickettsieae; Rickettsia; spotted fever group; Rickettsia rickettsii; Rickettsia rickettsii str. 'Sheila Smith'	2	7	6	1343
Rickettsia rickettsii str. Arizona	Bacteria; Proteobacteria; Alphaproteobacteria; Rickettsiales; Rickettsiaceae; Rickettsieae; Rickettsia; spotted fever group; Rickettsia rickettsii; Rickettsia rickettsii str. Arizona	2	7	6	1343
Rickettsia rickettsii str. Brazil	Bacteria; Proteobacteria; Alphaproteobacteria; Rickettsiales; Rickettsiaceae; Rickettsieae; Rickettsia; spotted fever group; Rickettsia rickettsii; Rickettsia rickettsii str. Brazil	2	7	6	1332
Rickettsia rickettsii str. Colombia	Bacteria; Proteobacteria; Alphaproteobacteria; Rickettsiales; Rickettsiaceae; Rickettsieae; Rickettsia; spotted fever group; Rickettsia rickettsii; Rickettsia rickettsii str. Colombia	2	7	6	1350
Rickettsia rickettsii str. Hauke	Bacteria; Proteobacteria; Alphaproteobacteria; Rickettsiales; Rickettsiaceae; Rickettsieae; Rickettsia; spotted fever group; Rickettsia rickettsii; Rickettsia rickettsii str. Hauke	2	7	6	1340
Rickettsia rickettsii str. Hino	Bacteria; Proteobacteria; Alphaproteobacteria; Rickettsiales; Rickettsiaceae; Rickettsieae; Rickettsia; spotted fever group; Rickettsia rickettsii; Rickettsia rickettsii str. Hino	2	7	6	1335
Rickettsia rickettsii str. Hlp#2	Bacteria; Proteobacteria; Alphaproteobacteria; Rickettsiales; Rickettsiaceae; Rickettsieae; Rickettsia; spotted fever group; Rickettsia rickettsii; Rickettsia rickettsii str. Hlp#2	2	6	6	1308
Rickettsia rickettsii str. Iowa	Bacteria; Proteobacteria; Alphaproteobacteria; Rickettsiales; Rickettsiaceae; Rickettsieae; Rickettsia; spotted fever group; Rickettsia rickettsii; Rickettsia rickettsii str. Iowa	2	7	6	1384
Rickettsia slovaca 13-B	Bacteria; Proteobacteria; Alphaproteobacteria; Rickettsiales; Rickettsiaceae; Rickettsieae; Rickettsia; spotted fever group; Rickettsia slovaca; Rickettsia slovaca 13-B	1	7	5	1112
Rickettsia slovaca str. D-CWPP	Bacteria; Proteobacteria; Alphaproteobacteria; Rickettsiales; Rickettsiaceae; Rickettsieae; Rickettsia; spotted fever group; Rickettsia slovaca; Rickettsia slovaca str. D-CWPP	2	9	7	1347
Rickettsia typhi str. B9991CWPP	Bacteria; Proteobacteria; Alphaproteobacteria; Rickettsiales; Rickettsiaceae; Rickettsieae; Rickettsia; typhus group; Rickettsia typhi; Rickettsia typhi str. B9991CWPP	0	3	2	839
Rickettsia typhi str. TH1527	Bacteria; Proteobacteria; Alphaproteobacteria; Rickettsiales; Rickettsiaceae; Rickettsieae; Rickettsia; typhus group; Rickettsia typhi; Rickettsia typhi str. TH1527	0	3	2	838
Rickettsia typhi str. Wilmington	Bacteria; Proteobacteria; Alphaproteobacteria; Rickettsiales; Rickettsiaceae; Rickettsieae; Rickettsia; typhus group; Rickettsia typhi; Rickettsia typhi str. Wilmington	0	3	2	837
Riemerella anatipestifer ATCC 11845 = DSM 15868	Bacteria; Bacteroidetes/Chlorobi group; Bacteroidetes; Flavobacteriia; Flavobacteriales; Flavobacteriaceae; Riemerella; Riemerella anatipestifer; Riemerella anatipestifer ATCC 11845 = DSM 15868	2	19	2	1972
Riemerella anatipestifer ATCC 11845 = DSM 15868	Bacteria; Bacteroidetes/Chlorobi group; Bacteroidetes; Flavobacteriia; Flavobacteriales; Flavobacteriaceae; Riemerella; Riemerella anatipestifer; Riemerella anatipestifer ATCC 11845 = DSM 15868	2	18	2	1941
Riemerella anatipestifer RA-GD	Bacteria; Bacteroidetes/Chlorobi group; Bacteroidetes; Flavobacteriia; Flavobacteriales; Flavobacteriaceae; Riemerella; Riemerella anatipestifer; Riemerella anatipestifer RA-GD	2	18	2	1985
Robiginitalea biformata HTCC2501	Bacteria; Bacteroidetes/Chlorobi group; Bacteroidetes; Flavobacteriia; Flavobacteriales; Flavobacteriaceae; Robiginitalea; Robiginitalea biformata; Robiginitalea biformata HTCC2501	5	49	5	3209
Roseburia hominis A2-183	Bacteria; Firmicutes; Clostridia; Clostridiales; Lachnospiraceae; Roseburia; Roseburia hominis; Roseburia hominis A2-183	2	14	0	3362
Roseiflexus castenholzii DSM 13941	Bacteria; Chloroflexi; Chloroflexi; Chloroflexales; Chloroflexaceae; Roseiflexus; Roseiflexus castenholzii; Roseiflexus castenholzii DSM 13941	8	58	0	4330
Roseiflexus sp. RS-1	Bacteria; Chloroflexi; Chloroflexi; Chloroflexales; Chloroflexaceae; Roseiflexus; Roseiflexus sp. RS-1	12	64	0	4517
Roseobacter denitrificans OCh 114	Bacteria; Proteobacteria; Alphaproteobacteria; Rhodobacterales; Rhodobacteraceae; Roseobacter; Roseobacter denitrificans; Roseobacter denitrificans OCh 114	0	20	0	4129
Roseobacter litoralis Och 149	Bacteria; Proteobacteria; Alphaproteobacteria; Rhodobacterales; Rhodobacteraceae; Roseobacter; Roseobacter litoralis; Roseobacter litoralis Och 149	1	24	0	4537
Rothia dentocariosa ATCC 17931	Bacteria; Actinobacteria; Actinobacteria; Actinobacteridae; Actinomycetales; Micrococcineae; Micrococcaceae; Rothia; Rothia dentocariosa; Rothia dentocariosa ATCC 17931	2	5	1	2217
Rothia mucilaginosa DY-18	Bacteria; Actinobacteria; Actinobacteria; Actinobacteridae; Actinomycetales; Micrococcineae; Micrococcaceae; Rothia; Rothia mucilaginosa; Rothia mucilaginosa DY-18	0	2	0
Rubrivivax gelatinosus IL144	Bacteria; Proteobacteria; Betaproteobacteria; Burkholderiales; unclassified Burkholderiales; Burkholderiales Genera incertae sedis; Rubrivivax; Rubrivivax gelatinosus; Rubrivivax gelatinosus IL144	2	38	2	4693
Rubrobacter xylanophilus DSM 9941	Bacteria; Actinobacteria; Actinobacteria; Rubrobacteridae; Rubrobacterales; Rubrobacterineae; Rubrobacteraceae; Rubrobacter; Rubrobacter xylanophilus; Rubrobacter xylanophilus DSM 9941	2	12	0	3140
Ruegeria pomeroyi DSS-3	Bacteria; Proteobacteria; Alphaproteobacteria; Rhodobacterales; Rhodobacteraceae; Ruegeria; Ruegeria pomeroyi; Ruegeria pomeroyi DSS-3	2	22	1	4252
Ruegeria sp. TM1040	Bacteria; Proteobacteria; Alphaproteobacteria; Rhodobacterales; Rhodobacteraceae; Ruegeria; Ruegeria sp. TM1040	3	21	1	3864
Ruminococcus albus 7	Bacteria; Firmicutes; Clostridia; Clostridiales; Ruminococcaceae; Ethanoligenens; Ethanoligenens harbinense; Ethanoligenens harbinense YUAN-3	1	6	1	3872
Runella slithyformis DSM 19594	Bacteria; Bacteroidetes/Chlorobi group; Bacteroidetes; Cytophagia; Cytophagales; Cytophagaceae; Runella; Runella slithyformis; Runella slithyformis DSM 19594	18	103	2	5774
Saccharomonospora viridis DSM 43017	Bacteria; Actinobacteria; Actinobacteria; Actinobacteridae; Actinomycetales; Pseudonocardineae; Pseudonocardiaceae; Saccharomonospora; Saccharomonospora viridis; Saccharomonospora viridis DSM 43017	1	22	3	3828
Saccharophagus degradans 2-40	Bacteria; Proteobacteria; Gammaproteobacteria; Alteromonadales; Alteromonadaceae; Saccharophagus; Saccharophagus degradans; Saccharophagus degradans 2-40	1	44	1	4007
Saccharopolyspora erythraea NRRL 2338	Bacteria; Actinobacteria; Actinobacteria; Actinobacteridae; Actinomycetales; Pseudonocardineae; Pseudonocardiaceae; Saccharopolyspora; Saccharopolyspora erythraea; Saccharopolyspora erythraea NRRL 2338	1	47	0	7197
Salinibacter ruber DSM 13855	Bacteria; Bacteroidetes/Chlorobi group; Bacteroidetes; Bacteroidetes Order II. Incertae sedis; Rhodothermaceae; Salinibacter; Salinibacter ruber; Salinibacter ruber DSM 13855	3	31	1	2833
Salinibacter ruber M8	Bacteria; Bacteroidetes/Chlorobi group; Bacteroidetes; Bacteroidetes Order II. Incertae sedis; Rhodothermaceae; Salinibacter; Salinibacter ruber; Salinibacter ruber M8	2	33	1	3257
Salinispora arenicola CNS-205	Bacteria; Actinobacteria; Actinobacteria; Actinobacteridae; Actinomycetales; Micromonosporineae; Micromonosporaceae; Salinispora; Salinispora arenicola; Salinispora arenicola CNS-205	5	36	0	4917
Salinispora tropica CNB-440	Bacteria; Actinobacteria; Actinobacteria; Actinobacteridae; Actinomycetales; Micromonosporineae; Micromonosporaceae; Salinispora; Salinispora tropica; Salinispora tropica CNB-440	8	25	0	4536
Salmonella bongori NCTC 12419	Bacteria; Proteobacteria; Gammaproteobacteria; Enterobacteriales; Enterobacteriaceae; Salmonella; Salmonella bongori; Salmonella bongori NCTC 12419	0	2	0	3863
Salmonella enterica subsp. arizonae serovar 62:z4,z23:-- str. RSK2980	Bacteria; Proteobacteria; Gammaproteobacteria; Enterobacteriales; Enterobacteriaceae; Salmonella; Salmonella enterica; Salmonella enterica subsp. arizonae; Salmonella enterica subsp. arizonae serovar 62:z4,z23:--; Salmonella enterica subsp. arizonae serovar 62:z4,z23:-- str. RSK2980	0	20	0	4467
Salmonella enterica subsp. enterica serovar Agona str. SL483	Bacteria; Proteobacteria; Gammaproteobacteria; Enterobacteriales; Enterobacteriaceae; Salmonella; Salmonella enterica; Salmonella enterica subsp. enterica; Salmonella enterica subsp. enterica serovar Agona; Salmonella enterica subsp. enterica serovar Agona str. SL483	0	20	0	4632
Salmonella enterica subsp. enterica serovar Choleraesuis str. SC-B67	Bacteria; Proteobacteria; Gammaproteobacteria; Enterobacteriales; Enterobacteriaceae; Salmonella; Salmonella enterica; Salmonella enterica subsp. enterica; Salmonella enterica subsp. enterica serovar Choleraesuis; Salmonella enterica subsp. enterica serovar Choleraesuis str. SC-B67	1	17	0	4627
Salmonella enterica subsp. enterica serovar Dublin str. CT_02021853	Bacteria; Proteobacteria; Gammaproteobacteria; Enterobacteriales; Enterobacteriaceae; Salmonella; Salmonella enterica; Salmonella enterica subsp. enterica; Salmonella enterica subsp. enterica serovar Dublin; Salmonella enterica subsp. enterica serovar Dublin str. CT_02021853	0	18	0	4616
Salmonella enterica subsp. enterica serovar Enteritidis str. P125109	Bacteria; Proteobacteria; Gammaproteobacteria; Enterobacteriales; Enterobacteriaceae; Salmonella; Salmonella enterica; Salmonella enterica subsp. enterica; Salmonella enterica subsp. enterica serovar Enteritidis; Salmonella enterica subsp. enterica serovar Enteritidis str. P125109	0	18	0	4206
Salmonella enterica subsp. enterica serovar Gallinarum str. 287/91	Bacteria; Proteobacteria; Gammaproteobacteria; Enterobacteriales; Enterobacteriaceae; Salmonella; Salmonella enterica; Salmonella enterica subsp. enterica; Salmonella enterica subsp. enterica serovar Gallinarum; Salmonella enterica subsp. enterica serovar Gallinarum str. 287/91	0	17	0	3965
Salmonella enterica subsp. enterica serovar Gallinarum/pullorum str. RKS5078	Bacteria; Proteobacteria; Gammaproteobacteria; Enterobacteriales; Enterobacteriaceae; Salmonella; Salmonella enterica; Salmonella enterica subsp. enterica; Salmonella enterica subsp. enterica serovar Gallinarum/pullorum; Salmonella enterica subsp. enterica serovar Gallinarum/pullorum str. RKS5078	0	15	0	4325
Salmonella enterica subsp. enterica serovar Heidelberg str. B182	Bacteria; Proteobacteria; Gammaproteobacteria; Enterobacteriales; Enterobacteriaceae; Salmonella; Salmonella enterica; Salmonella enterica subsp. enterica; Salmonella enterica subsp. enterica serovar Heidelberg; Salmonella enterica subsp. enterica serovar Heidelberg str. B182	0	17	0	4332
Salmonella enterica subsp. enterica serovar Heidelberg str. SL476	Bacteria; Proteobacteria; Gammaproteobacteria; Enterobacteriales; Enterobacteriaceae; Salmonella; Salmonella enterica; Salmonella enterica subsp. enterica; Salmonella enterica subsp. enterica serovar Heidelberg; Salmonella enterica subsp. enterica serovar Heidelberg str. SL476	1	19	0	4795
Salmonella enterica subsp. enterica serovar Newport str. SL254	Bacteria; Proteobacteria; Gammaproteobacteria; Enterobacteriales; Enterobacteriaceae; Salmonella; Salmonella enterica; Salmonella enterica subsp. enterica; Salmonella enterica subsp. enterica serovar Newport; Salmonella enterica subsp. enterica serovar Newport str. SL254	0	18	0	4798
Salmonella enterica subsp. enterica serovar Paratyphi A str. AKU_12601	Bacteria; Proteobacteria; Gammaproteobacteria; Enterobacteriales; Enterobacteriaceae; Salmonella; Salmonella enterica; Salmonella enterica subsp. enterica; Salmonella enterica subsp. enterica serovar Paratyphi A; Salmonella enterica subsp. enterica serovar Paratyphi A str. AKU_12601	0	16	0	4070
Salmonella enterica subsp. enterica serovar Paratyphi A str. ATCC 9150	Bacteria; Proteobacteria; Gammaproteobacteria; Enterobacteriales; Enterobacteriaceae; Salmonella; Salmonella enterica; Salmonella enterica subsp. enterica; Salmonella enterica subsp. enterica serovar Paratyphi A; Salmonella enterica subsp. enterica serovar Paratyphi A str. ATCC 9150	0	18	0	4096
Salmonella enterica subsp. enterica serovar Paratyphi B str. SPB7	Bacteria; Proteobacteria; Gammaproteobacteria; Enterobacteriales; Enterobacteriaceae; Salmonella; Salmonella enterica; Salmonella enterica subsp. enterica; Salmonella enterica subsp. enterica serovar Paratyphi B; Salmonella enterica subsp. enterica serovar Paratyphi B str. SPB7	0	18	0	5591
Salmonella enterica subsp. enterica serovar Schwarzengrund str. CVM19633	Bacteria; Proteobacteria; Gammaproteobacteria; Enterobacteriales; Enterobacteriaceae; Salmonella; Salmonella enterica; Salmonella enterica subsp. enterica; Salmonella enterica subsp. enterica serovar Schwarzengrund; Salmonella enterica subsp. enterica serovar Schwarzengrund str. CVM19633	0	17	1	4665
Salmonella enterica subsp. enterica serovar Typhi str. CT18	Bacteria; Proteobacteria; Gammaproteobacteria; Enterobacteriales; Enterobacteriaceae; Salmonella; Salmonella enterica; Salmonella enterica subsp. enterica; Salmonella enterica subsp. enterica serovar Typhi; Salmonella enterica subsp. enterica serovar Typhi str. CT18	0	21	0	4748
Salmonella enterica subsp. enterica serovar Typhi str. P-stx-12	Bacteria; Proteobacteria; Gammaproteobacteria; Enterobacteriales; Enterobacteriaceae; Salmonella; Salmonella enterica; Salmonella enterica subsp. enterica; Salmonella enterica subsp. enterica serovar Typhi; Salmonella enterica subsp. enterica serovar Typhi str. P-stx-12	1	21	0	4924
Salmonella enterica subsp. enterica serovar Typhi str. Ty2	Bacteria; Proteobacteria; Gammaproteobacteria; Enterobacteriales; Enterobacteriaceae; Salmonella; Salmonella enterica; Salmonella enterica subsp. enterica; Salmonella enterica subsp. enterica serovar Typhi; Salmonella enterica subsp. enterica serovar Typhi str. Ty2	0	21	0	4370
Salmonella enterica subsp. enterica serovar Typhimurium str. 14028S	Bacteria; Proteobacteria; Gammaproteobacteria; Enterobacteriales; Enterobacteriaceae; Salmonella; Salmonella enterica; Salmonella enterica subsp. enterica; Salmonella enterica subsp. enterica serovar Typhimurium; Salmonella enterica subsp. enterica serovar Typhimurium str. LT2; Salmonella enterica subsp. enterica serovar Typhimurium str. 14028S	0	17	0	5416
Salmonella enterica subsp. enterica serovar Typhimurium str. 798	Bacteria; Proteobacteria; Gammaproteobacteria; Enterobacteriales; Enterobacteriaceae; Salmonella; Salmonella enterica; Salmonella enterica subsp. enterica; Salmonella enterica subsp. enterica serovar Typhimurium; Salmonella enterica subsp. enterica serovar Typhimurium str. 798	0	17	0	4430
Salmonella enterica subsp. enterica serovar Typhimurium str. D23580	Bacteria; Proteobacteria; Gammaproteobacteria; Enterobacteriales; Enterobacteriaceae; Salmonella; Salmonella enterica; Salmonella enterica subsp. enterica; Salmonella enterica subsp. enterica serovar Typhimurium; Salmonella enterica subsp. enterica serovar Typhimurium str. D23580	0	18	0
Salmonella enterica subsp. enterica serovar Typhimurium str. LT2	Bacteria; Proteobacteria; Gammaproteobacteria; Enterobacteriales; Enterobacteriaceae; Salmonella; Salmonella enterica; Salmonella enterica subsp. enterica; Salmonella enterica subsp. enterica serovar Typhimurium; Salmonella enterica subsp. enterica serovar Typhimurium str. LT2	0	18	0	4560
Salmonella enterica subsp. enterica serovar Typhimurium str. SL1344	Bacteria; Proteobacteria; Gammaproteobacteria; Enterobacteriales; Enterobacteriaceae; Salmonella; Salmonella enterica; Salmonella enterica subsp. enterica; Salmonella enterica subsp. enterica serovar Typhimurium; Salmonella enterica subsp. enterica serovar Typhimurium str. SL1344	0	17	0	4655
Salmonella enterica subsp. enterica serovar Typhimurium str. ST4/74	Bacteria; Proteobacteria; Gammaproteobacteria; Enterobacteriales; Enterobacteriaceae; Salmonella; Salmonella enterica; Salmonella enterica subsp. enterica; Salmonella enterica subsp. enterica serovar Typhimurium; Salmonella enterica subsp. enterica serovar Typhimurium str. ST4/74	1	18	0	4842
Salmonella enterica subsp. enterica serovar Typhimurium str. T000240	Bacteria; Proteobacteria; Gammaproteobacteria; Enterobacteriales; Enterobacteriaceae; Salmonella; Salmonella enterica; Salmonella enterica subsp. enterica; Salmonella enterica subsp. enterica serovar Typhimurium; Salmonella enterica subsp. enterica serovar Typhimurium str. T000240	0	18	0	4870
Salmonella enterica subsp. enterica serovar Typhimurium str. UK-1	Bacteria; Proteobacteria; Gammaproteobacteria; Enterobacteriales; Enterobacteriaceae; Salmonella; Salmonella enterica; Salmonella enterica subsp. enterica; Salmonella enterica subsp. enterica serovar Typhimurium; Salmonella enterica subsp. enterica serovar Typhimurium str. UK-1	0	17	0	4555
Sanguibacter keddieii DSM 10542	Bacteria; Actinobacteria; Actinobacteria; Actinobacteridae; Actinomycetales; Micrococcineae; Sanguibacteraceae; Sanguibacter; Sanguibacter keddieii; Sanguibacter keddieii DSM 10542	2	7	2	3710
Saprospira grandis str. Lewin	Bacteria; Bacteroidetes/Chlorobi group; Bacteroidetes; Sphingobacteriia; Sphingobacteriales; Saprospiraceae; Saprospira; Saprospira grandis; Saprospira grandis str. Lewin	4	73	2	4251
Sebaldella termitidis ATCC 33386	Bacteria; Fusobacteria; Fusobacteriia; Fusobacteriales; Leptotrichiaceae; Sebaldella; Sebaldella termitidis; Sebaldella termitidis ATCC 33386	2	20	2	4150
secondary endosymbiont of Ctenarytaina eucalypti	Bacteria; Proteobacteria; Gammaproteobacteria; Enterobacteriales; Enterobacteriaceae; unclassified Enterobacteriaceae; ant, tsetse, mealybug, aphid, etc. endosymbionts; aphid secondary symbionts; secondary endosymbiont of Ctenarytaina eucalypti	0	2	0	918
Segniliparus rotundus DSM 44985	Bacteria; Actinobacteria; Actinobacteria; Actinobacteridae; Actinomycetales; Corynebacterineae; Segniliparaceae; Segniliparus; Segniliparus rotundus; Segniliparus rotundus DSM 44985	0	4	2	3006
Selenomonas ruminantium subsp. lactilytica TAM6421	Bacteria; Firmicutes; Negativicutes; Selenomonadales; Veillonellaceae; Selenomonas; Selenomonas ruminantium; Selenomonas ruminantium subsp. lactilytica; Selenomonas ruminantium subsp. lactilytica TAM6421	1	17	0	3512
Selenomonas sputigena ATCC 35185	Bacteria; Firmicutes; Negativicutes; Selenomonadales; Veillonellaceae; Selenomonas; Selenomonas sputigena; Selenomonas sputigena ATCC 35185	0	11	0	2255
Serratia plymuthica AS9	Bacteria; Proteobacteria; Gammaproteobacteria; Enterobacteriales; Enterobacteriaceae; Serratia; Serratia plymuthica; Serratia plymuthica AS9	1	17	1	4952
Serratia proteamaculans 568	Bacteria; Proteobacteria; Gammaproteobacteria; Enterobacteriales; Enterobacteriaceae; Serratia; Serratia proteamaculans; Serratia proteamaculans 568	1	17	2	4942
Serratia sp. AS12	Bacteria; Proteobacteria; Gammaproteobacteria; Enterobacteriales; Enterobacteriaceae; Serratia; Serratia sp. AS12	1	17	1	4952
Serratia sp. AS13	Bacteria; Proteobacteria; Gammaproteobacteria; Enterobacteriales; Enterobacteriaceae; Serratia; Serratia sp. AS13	1	17	1	4951
Serratia symbiotica str. 'Cinara cedri'	Bacteria; Proteobacteria; Gammaproteobacteria; Enterobacteriales; Enterobacteriaceae; Serratia; Serratia symbiotica; Serratia symbiotica str. 'Cinara cedri'	0	1	0	672
Shewanella amazonensis SB2B	Bacteria; Proteobacteria; Gammaproteobacteria; Alteromonadales; Shewanellaceae; Shewanella; Shewanella amazonensis; Shewanella amazonensis SB2B	3	29	2	3645
Shewanella baltica BA175	Bacteria; Proteobacteria; Gammaproteobacteria; Alteromonadales; Shewanellaceae; Shewanella; Shewanella baltica; Shewanella baltica BA175	2	26	3	4344
Shewanella baltica OS117	Bacteria; Proteobacteria; Gammaproteobacteria; Alteromonadales; Shewanellaceae; Shewanella; Shewanella baltica; Shewanella baltica OS117	2	25	2	4668
Shewanella baltica OS155	Bacteria; Proteobacteria; Gammaproteobacteria; Alteromonadales; Shewanellaceae; Shewanella; Shewanella baltica; Shewanella baltica OS155	2	27	2	4489
Shewanella baltica OS185	Bacteria; Proteobacteria; Gammaproteobacteria; Alteromonadales; Shewanellaceae; Shewanella; Shewanella baltica; Shewanella baltica OS185	4	27	1	4394
Shewanella baltica OS195	Bacteria; Proteobacteria; Gammaproteobacteria; Alteromonadales; Shewanellaceae; Shewanella; Shewanella baltica; Shewanella baltica OS195	3	28	2	4688
Shewanella baltica OS223	Bacteria; Proteobacteria; Gammaproteobacteria; Alteromonadales; Shewanellaceae; Shewanella; Shewanella baltica; Shewanella baltica OS223	2	23	0	4436
Shewanella baltica OS678	Bacteria; Proteobacteria; Gammaproteobacteria; Alteromonadales; Shewanellaceae; Shewanella; Shewanella baltica; Shewanella baltica OS678	3	29	2	4536
Shewanella denitrificans OS217	Bacteria; Proteobacteria; Gammaproteobacteria; Alteromonadales; Shewanellaceae; Shewanella; Shewanella denitrificans; Shewanella denitrificans OS217	0	35	2	3754
Shewanella frigidimarina NCIMB 400	Bacteria; Proteobacteria; Gammaproteobacteria; Alteromonadales; Shewanellaceae; Shewanella; Shewanella frigidimarina; Shewanella frigidimarina NCIMB 400	1	32	3	4029
Shewanella halifaxensis HAW-EB4	Bacteria; Proteobacteria; Gammaproteobacteria; Alteromonadales; Shewanellaceae; Shewanella; Shewanella halifaxensis; Shewanella halifaxensis HAW-EB4	1	28	3	4278
Shewanella loihica PV-4	Bacteria; Proteobacteria; Gammaproteobacteria; Alteromonadales; Shewanellaceae; Shewanella; Shewanella loihica; Shewanella loihica PV-4	1	29	1	3859
Shewanella oneidensis MR-1	Bacteria; Proteobacteria; Gammaproteobacteria; Alteromonadales; Shewanellaceae; Shewanella; Shewanella oneidensis; Shewanella oneidensis MR-1	2	26	2	4217
Shewanella pealeana ATCC 700345	Bacteria; Proteobacteria; Gammaproteobacteria; Alteromonadales; Shewanellaceae; Shewanella; Shewanella pealeana; Shewanella pealeana ATCC 700345	1	32	2	4241
Shewanella piezotolerans WP3	Bacteria; Proteobacteria; Gammaproteobacteria; Alteromonadales; Shewanellaceae; Shewanella; Shewanella piezotolerans; Shewanella piezotolerans WP3	3	32	2	4911
Shewanella putrefaciens 200	Bacteria; Proteobacteria; Gammaproteobacteria; Alteromonadales; Shewanellaceae; Shewanella; Shewanella putrefaciens; Shewanella putrefaciens 200	2	20	1	4179
Shewanella putrefaciens CN-32	Bacteria; Proteobacteria; Gammaproteobacteria; Alteromonadales; Shewanellaceae; Shewanella; Shewanella putrefaciens; Shewanella putrefaciens CN-32	2	21	1	3972
Shewanella sediminis HAW-EB3	Bacteria; Proteobacteria; Gammaproteobacteria; Alteromonadales; Shewanellaceae; Shewanella; Shewanella sediminis; Shewanella sediminis HAW-EB3	2	35	2	4497
Shewanella sp. ANA-3	Bacteria; Proteobacteria; Gammaproteobacteria; Alteromonadales; Shewanellaceae; Shewanella; Shewanella sp. ANA-3	2	28	0	4360
Shewanella sp. MR-4	Bacteria; Proteobacteria; Gammaproteobacteria; Alteromonadales; Shewanellaceae; Shewanella; Shewanella sp. MR-4	2	25	2	3924
Shewanella sp. MR-7	Bacteria; Proteobacteria; Gammaproteobacteria; Alteromonadales; Shewanellaceae; Shewanella; Shewanella sp. MR-7	2	27	0	4014
Shewanella sp. W3-18-1	Bacteria; Proteobacteria; Gammaproteobacteria; Alteromonadales; Shewanellaceae; Shewanella; Shewanella sp. W3-18-1	2	22	0	4044
Shewanella violacea DSS12	Bacteria; Proteobacteria; Gammaproteobacteria; Alteromonadales; Shewanellaceae; Shewanella; Shewanella violacea; Shewanella violacea DSS12	1	30	1	4346
Shewanella woodyi ATCC 51908	Bacteria; Proteobacteria; Gammaproteobacteria; Alteromonadales; Shewanellaceae; Shewanella; Shewanella woodyi; Shewanella woodyi ATCC 51908	2	48	0	4880
Shigella boydii CDC 3083-94	Bacteria; Proteobacteria; Gammaproteobacteria; Enterobacteriales; Enterobacteriaceae; Shigella; Shigella boydii; Shigella boydii CDC 3083-94	0	3	3	4557
Shigella boydii Sb227	Bacteria; Proteobacteria; Gammaproteobacteria; Enterobacteriales; Enterobacteriaceae; Shigella; Shigella boydii; Shigella boydii Sb227	1	12	2	4281
Shigella dysenteriae Sd197	Bacteria; Proteobacteria; Gammaproteobacteria; Enterobacteriales; Enterobacteriaceae; Shigella; Shigella dysenteriae; Shigella dysenteriae Sd197	0	5	3	4501
Shigella flexneri 2002017	Bacteria; Proteobacteria; Gammaproteobacteria; Enterobacteriales; Enterobacteriaceae; Shigella; Shigella flexneri; Shigella flexneri 2002017	0	13	4	4703
Shigella flexneri 2a str. 2457T	Bacteria; Proteobacteria; Gammaproteobacteria; Enterobacteriales; Enterobacteriaceae; Shigella; Shigella flexneri; Shigella flexneri 2a; Shigella flexneri 2a str. 2457T	0	12	0	4060
Shigella flexneri 2a str. 301	Bacteria; Proteobacteria; Gammaproteobacteria; Enterobacteriales; Enterobacteriaceae; Shigella; Shigella flexneri; Shigella flexneri 2a; Shigella flexneri 2a str. 301	0	14	3	4439
Shigella flexneri 5 str. 8401	Bacteria; Proteobacteria; Gammaproteobacteria; Enterobacteriales; Enterobacteriaceae; Shigella; Shigella flexneri; Shigella flexneri 5; Shigella flexneri 5 str. 8401	0	13	0	4114
Shigella sonnei 53G	Bacteria; Proteobacteria; Gammaproteobacteria; Enterobacteriales; Enterobacteriaceae; Shigella; Shigella sonnei; Shigella sonnei 53G	0	16	5	5139
Shigella sonnei Ss046	Bacteria; Proteobacteria; Gammaproteobacteria; Enterobacteriales; Enterobacteriaceae; Shigella; Shigella sonnei; Shigella sonnei Ss046	0	5	3	4470
Sideroxydans lithotrophicus ES-1	Bacteria; Proteobacteria; Betaproteobacteria; Gallionellales; Gallionellaceae; Sideroxydans; Sideroxydans lithotrophicus; Sideroxydans lithotrophicus ES-1	3	37	6	2980
Simkania negevensis Z	Bacteria; Chlamydiae/Verrucomicrobia group; Chlamydiae; Chlamydiia; Chlamydiales; Simkaniaceae; Simkania; Simkania negevensis; Simkania negevensis Z	4	18	13	2518
Sinorhizobium fredii HH103	Bacteria; Proteobacteria; Alphaproteobacteria; Rhizobiales; Rhizobiaceae; Sinorhizobium/Ensifer group; Sinorhizobium; Sinorhizobium fredii group; Sinorhizobium fredii; Sinorhizobium fredii HH103	2	52	2	6166
Sinorhizobium fredii NGR234	Bacteria; Proteobacteria; Alphaproteobacteria; Rhizobiales; Rhizobiaceae; Sinorhizobium/Ensifer group; Sinorhizobium; Sinorhizobium fredii group; Sinorhizobium fredii; Sinorhizobium fredii NGR234	2	42	2	6362
Sinorhizobium fredii USDA 257	Bacteria; Proteobacteria; Alphaproteobacteria; Rhizobiales; Rhizobiaceae; Sinorhizobium/Ensifer group; Sinorhizobium; Sinorhizobium fredii group; Sinorhizobium fredii; Sinorhizobium fredii USDA 257	1	43	0	6119
Sinorhizobium medicae WSM419	Bacteria; Proteobacteria; Alphaproteobacteria; Rhizobiales; Rhizobiaceae; Sinorhizobium/Ensifer group; Sinorhizobium; Sinorhizobium medicae; Sinorhizobium medicae WSM419	3	38	2	6213
Sinorhizobium meliloti 1021	Bacteria; Proteobacteria; Alphaproteobacteria; Rhizobiales; Rhizobiaceae; Sinorhizobium/Ensifer group; Sinorhizobium; Sinorhizobium meliloti; Sinorhizobium meliloti 1021	2	38	1	6218
Sinorhizobium meliloti AK83	Bacteria; Proteobacteria; Alphaproteobacteria; Rhizobiales; Rhizobiaceae; Sinorhizobium/Ensifer group; Sinorhizobium; Sinorhizobium meliloti; Sinorhizobium meliloti AK83	2	40	1	6510
Sinorhizobium meliloti BL225C	Bacteria; Proteobacteria; Alphaproteobacteria; Rhizobiales; Rhizobiaceae; Sinorhizobium/Ensifer group; Sinorhizobium; Sinorhizobium meliloti; Sinorhizobium meliloti BL225C	2	46	1	6354
Sinorhizobium meliloti SM11	Bacteria; Proteobacteria; Alphaproteobacteria; Rhizobiales; Rhizobiaceae; Sinorhizobium/Ensifer group; Sinorhizobium; Sinorhizobium meliloti; Sinorhizobium meliloti SM11	1	44	1	7093
Slackia heliotrinireducens DSM 20476	Bacteria; Actinobacteria; Actinobacteria; Coriobacteridae; Coriobacteriales; Coriobacterineae; Coriobacteriaceae; Slackia; Slackia heliotrinireducens; Slackia heliotrinireducens DSM 20476	4	7	4	2766
Sodalis glossinidius str. 'morsitans'	Bacteria; Proteobacteria; Gammaproteobacteria; Enterobacteriales; Enterobacteriaceae; Sodalis; Sodalis glossinidius; Sodalis glossinidius str. 'morsitans'	0	10	1	2516
Solibacillus silvestris StLB046	Bacteria; Firmicutes; Bacilli; Bacillales; Planococcaceae; Solibacillus; Solibacillus silvestris; Solibacillus silvestris StLB046	5	12	0	3823
Solitalea canadensis DSM 3403	Bacteria; Bacteroidetes/Chlorobi group; Bacteroidetes; Sphingobacteriia; Sphingobacteriales; Sphingobacteriaceae; Solitalea; Solitalea canadensis; Solitalea canadensis DSM 3403	8	98	6	4310
Sorangium cellulosum 'So ce 56'	Bacteria; Proteobacteria; delta/epsilon subdivisions; Deltaproteobacteria; Myxococcales; Sorangiineae; Polyangiaceae; Sorangium; Sorangium cellulosum; Sorangium cellulosum 'So ce 56'	46	242	0	9380
Sphaerobacter thermophilus DSM 20745	Bacteria; Chloroflexi; Thermomicrobia; Sphaerobacteridae; Sphaerobacterales; Sphaerobacterineae; Sphaerobacteraceae; Sphaerobacter; Sphaerobacter thermophilus; Sphaerobacter thermophilus DSM 20745	4	22	0	3485
Sphaerochaeta coccoides DSM 17374	Bacteria; Spirochaetes; Spirochaetia; Spirochaetales; Spirochaetaceae; Sphaerochaeta; Sphaerochaeta coccoides; Sphaerochaeta coccoides DSM 17374	2	7	1	1822
Sphaerochaeta globus str. Buddy	Bacteria; Spirochaetes; Spirochaetia; Spirochaetales; Spirochaetaceae; Sphaerochaeta; Sphaerochaeta globus; Sphaerochaeta globus str. Buddy	3	9	2	3017
Sphaerochaeta pleomorpha str. Grapes	Bacteria; Spirochaetes; Spirochaetia; Spirochaetales; Spirochaetaceae; Sphaerochaeta; Sphaerochaeta pleomorpha; Sphaerochaeta pleomorpha str. Grapes	2	14	3	3159
Sphingobacterium sp. 21	Bacteria; Bacteroidetes/Chlorobi group; Bacteroidetes; Sphingobacteriia; Sphingobacteriales; Sphingobacteriaceae; Sphingobacterium; Sphingobacterium sp. 21	4	154	6	5169
Sphingobium chlorophenolicum L-1	Bacteria; Proteobacteria; Alphaproteobacteria; Sphingomonadales; Sphingomonadaceae; Sphingobium; Sphingobium chlorophenolicum; Sphingobium chlorophenolicum L-1	3	27	1	4072
Sphingobium japonicum UT26S	Bacteria; Proteobacteria; Alphaproteobacteria; Sphingomonadales; Sphingomonadaceae; Sphingobium; Sphingobium japonicum; Sphingobium japonicum UT26S	0	25	1	4394
Sphingobium sp. SYK-6	Bacteria; Proteobacteria; Alphaproteobacteria; Sphingomonadales; Sphingomonadaceae; Sphingobium; Sphingobium sp. SYK-6	3	27	2	4062
Sphingomonas wittichii RW1	Bacteria; Proteobacteria; Alphaproteobacteria; Sphingomonadales; Sphingomonadaceae; Sphingomonas; Sphingomonas wittichii; Sphingomonas wittichii RW1	2	41	3	5345
Sphingopyxis alaskensis RB2256	Bacteria; Proteobacteria; Alphaproteobacteria; Sphingomonadales; Sphingomonadaceae; Sphingopyxis; Sphingopyxis alaskensis; Sphingopyxis alaskensis RB2256	2	24	1	3195
Spirochaeta africana DSM 8902	Bacteria; Spirochaetes; Spirochaetia; Spirochaetales; Spirochaetaceae; Spirochaeta; Spirochaeta africana; Spirochaeta africana DSM 8902	4	45	4	2782
Spirochaeta caldaria DSM 7334	Bacteria; Spirochaetes; Spirochaetia; Spirochaetales; Spirochaetaceae; Spirochaeta; Spirochaeta caldaria; Spirochaeta caldaria DSM 7334	6	51	2	2789
Spirochaeta smaragdinae DSM 11293	Bacteria; Spirochaetes; Spirochaetia; Spirochaetales; Spirochaetaceae; Spirochaeta; Spirochaeta smaragdinae; Spirochaeta smaragdinae DSM 11293	9	44	3	4219
Spirochaeta thermophila DSM 6192	Bacteria; Spirochaetes; Spirochaetia; Spirochaetales; Spirochaetaceae; Spirochaeta; Spirochaeta thermophila; Spirochaeta thermophila DSM 6192	6	44	1	2203
Spirochaeta thermophila DSM 6578	Bacteria; Spirochaetes; Spirochaetia; Spirochaetales; Spirochaetaceae; Spirochaeta; Spirochaeta thermophila; Spirochaeta thermophila DSM 6578	6	41	1	2264
Spirosoma linguale DSM 74	Bacteria; Bacteroidetes/Chlorobi group; Bacteroidetes; Cytophagia; Cytophagales; Cytophagaceae; Spirosoma; Spirosoma linguale; Spirosoma linguale DSM 74	13	140	1	6938
Stackebrandtia nassauensis DSM 44728	Bacteria; Actinobacteria; Actinobacteria; Actinobacteridae; Actinomycetales; Glycomycineae; Glycomycetaceae; Stackebrandtia; Stackebrandtia nassauensis; Stackebrandtia nassauensis DSM 44728	3	84	2	6379
Staphylococcus aureus 04-02981	Bacteria; Firmicutes; Bacilli; Bacillales; Staphylococcaceae; Staphylococcus; Staphylococcus aureus; Staphylococcus aureus 04-02981	4	4	0	2650
Staphylococcus aureus RF122	Bacteria; Firmicutes; Bacilli; Bacillales; Staphylococcaceae; Staphylococcus; Staphylococcus aureus; Staphylococcus aureus RF122	3	4	0	2509
Staphylococcus aureus subsp. aureus 11819-97	Bacteria; Firmicutes; Bacilli; Bacillales; Staphylococcaceae; Staphylococcus; Staphylococcus aureus; Staphylococcus aureus subsp. aureus; Staphylococcus aureus subsp. aureus 11819-97	4	4	0	2656
Staphylococcus aureus subsp. aureus 71193	Bacteria; Firmicutes; Bacilli; Bacillales; Staphylococcaceae; Staphylococcus; Staphylococcus aureus; Staphylococcus aureus subsp. aureus; Staphylococcus aureus subsp. aureus ST398; Staphylococcus aureus subsp. aureus 71193	3	4	0	2623
Staphylococcus aureus subsp. aureus COL	Bacteria; Firmicutes; Bacilli; Bacillales; Staphylococcaceae; Staphylococcus; Staphylococcus aureus; Staphylococcus aureus subsp. aureus; Staphylococcus aureus subsp. aureus COL	2	4	0	2615
Staphylococcus aureus subsp. aureus ECT-R 2	Bacteria; Firmicutes; Bacilli; Bacillales; Staphylococcaceae; Staphylococcus; Staphylococcus aureus; Staphylococcus aureus subsp. aureus; Staphylococcus aureus subsp. aureus ECT-R 2	3	4	0	2520
Staphylococcus aureus subsp. aureus ED133	Bacteria; Firmicutes; Bacilli; Bacillales; Staphylococcaceae; Staphylococcus; Staphylococcus aureus; Staphylococcus aureus subsp. aureus; Staphylococcus aureus subsp. aureus ED133	3	4	0	2653
Staphylococcus aureus subsp. aureus ED98	Bacteria; Firmicutes; Bacilli; Bacillales; Staphylococcaceae; Staphylococcus; Staphylococcus aureus; Staphylococcus aureus subsp. aureus; Staphylococcus aureus subsp. aureus ED98	3	4	0	2689
Staphylococcus aureus subsp. aureus HO 5096 0412	Bacteria; Firmicutes; Bacilli; Bacillales; Staphylococcaceae; Staphylococcus; Staphylococcus aureus; Staphylococcus aureus subsp. aureus; Staphylococcus aureus subsp. aureus HO 5096 0412	3	4	0	2547
Staphylococcus aureus subsp. aureus JH1	Bacteria; Firmicutes; Bacilli; Bacillales; Staphylococcaceae; Staphylococcus; Staphylococcus aureus; Staphylococcus aureus subsp. aureus; Staphylococcus aureus subsp. aureus JH1	5	4	0	2780
Staphylococcus aureus subsp. aureus JH9	Bacteria; Firmicutes; Bacilli; Bacillales; Staphylococcaceae; Staphylococcus; Staphylococcus aureus; Staphylococcus aureus subsp. aureus; Staphylococcus aureus subsp. aureus JH9	5	4	0	2726
Staphylococcus aureus subsp. aureus JKD6159	Bacteria; Firmicutes; Bacilli; Bacillales; Staphylococcaceae; Staphylococcus; Staphylococcus aureus; Staphylococcus aureus subsp. aureus; Staphylococcus aureus subsp. aureus JKD6159	3	4	0	2577
Staphylococcus aureus subsp. aureus LGA251	Bacteria; Firmicutes; Bacilli; Bacillales; Staphylococcaceae; Staphylococcus; Staphylococcus aureus; Staphylococcus aureus subsp. aureus; Staphylococcus aureus subsp. aureus LGA251	3	4	0	2433
Staphylococcus aureus subsp. aureus M013	Bacteria; Firmicutes; Bacilli; Bacillales; Staphylococcaceae; Staphylococcus; Staphylococcus aureus; Staphylococcus aureus subsp. aureus; Staphylococcus aureus subsp. aureus M013	3	4	0	2591
Staphylococcus aureus subsp. aureus MRSA252	Bacteria; Firmicutes; Bacilli; Bacillales; Staphylococcaceae; Staphylococcus; Staphylococcus aureus; Staphylococcus aureus subsp. aureus; Staphylococcus aureus subsp. aureus MRSA252	3	4	0	2650
Staphylococcus aureus subsp. aureus MSHR1132	Bacteria; Firmicutes; Bacilli; Bacillales; Staphylococcaceae; Staphylococcus; Staphylococcus aureus; Staphylococcus aureus subsp. aureus; Staphylococcus aureus subsp. aureus MSHR1132	3	4	0	2528
Staphylococcus aureus subsp. aureus MSSA476	Bacteria; Firmicutes; Bacilli; Bacillales; Staphylococcaceae; Staphylococcus; Staphylococcus aureus; Staphylococcus aureus subsp. aureus; Staphylococcus aureus subsp. aureus MSSA476	2	4	0	2590
Staphylococcus aureus subsp. aureus Mu3	Bacteria; Firmicutes; Bacilli; Bacillales; Staphylococcaceae; Staphylococcus; Staphylococcus aureus; Staphylococcus aureus subsp. aureus; Staphylococcus aureus subsp. aureus Mu3	4	4	0	2690
Staphylococcus aureus subsp. aureus Mu50	Bacteria; Firmicutes; Bacilli; Bacillales; Staphylococcaceae; Staphylococcus; Staphylococcus aureus; Staphylococcus aureus subsp. aureus; Staphylococcus aureus subsp. aureus Mu50	4	4	0	2730
Staphylococcus aureus subsp. aureus MW2	Bacteria; Firmicutes; Bacilli; Bacillales; Staphylococcaceae; Staphylococcus; Staphylococcus aureus; Staphylococcus aureus subsp. aureus; Staphylococcus aureus subsp. aureus MW2	2	4	0	2624
Staphylococcus aureus subsp. aureus N315	Bacteria; Firmicutes; Bacilli; Bacillales; Staphylococcaceae; Staphylococcus; Staphylococcus aureus; Staphylococcus aureus subsp. aureus; Staphylococcus aureus subsp. aureus N315	3	4	0	2614
Staphylococcus aureus subsp. aureus NCTC 8325	Bacteria; Firmicutes; Bacilli; Bacillales; Staphylococcaceae; Staphylococcus; Staphylococcus aureus; Staphylococcus aureus subsp. aureus; Staphylococcus aureus subsp. aureus NCTC 8325	3	4	0	2891
Staphylococcus aureus subsp. aureus S0385	Bacteria; Firmicutes; Bacilli; Bacillales; Staphylococcaceae; Staphylococcus; Staphylococcus aureus; Staphylococcus aureus subsp. aureus; Staphylococcus aureus subsp. aureus ST398; Staphylococcus aureus subsp. aureus S0385	2	4	0
Staphylococcus aureus subsp. aureus str. JKD6008	Bacteria; Firmicutes; Bacilli; Bacillales; Staphylococcaceae; Staphylococcus; Staphylococcus aureus; Staphylococcus aureus subsp. aureus; Staphylococcus aureus subsp. aureus str. JKD6008	3	4	0	2680
Staphylococcus aureus subsp. aureus str. Newman	Bacteria; Firmicutes; Bacilli; Bacillales; Staphylococcaceae; Staphylococcus; Staphylococcus aureus; Staphylococcus aureus subsp. aureus; Staphylococcus aureus subsp. aureus str. Newman	6	4	0	2614
Staphylococcus aureus subsp. aureus T0131	Bacteria; Firmicutes; Bacilli; Bacillales; Staphylococcaceae; Staphylococcus; Staphylococcus aureus; Staphylococcus aureus subsp. aureus; Staphylococcus aureus subsp. aureus T0131	3	4	0	2711
Staphylococcus aureus subsp. aureus TCH60	Bacteria; Firmicutes; Bacilli; Bacillales; Staphylococcaceae; Staphylococcus; Staphylococcus aureus; Staphylococcus aureus subsp. aureus; Staphylococcus aureus subsp. aureus TCH60	3	4	0	2700
Staphylococcus aureus subsp. aureus TW20	Bacteria; Firmicutes; Bacilli; Bacillales; Staphylococcaceae; Staphylococcus; Staphylococcus aureus; Staphylococcus aureus subsp. aureus; Staphylococcus aureus subsp. aureus TW20	4	4	0	2807
Staphylococcus aureus subsp. aureus USA300_FPR3757	Bacteria; Firmicutes; Bacilli; Bacillales; Staphylococcaceae; Staphylococcus; Staphylococcus aureus; Staphylococcus aureus subsp. aureus; Staphylococcus aureus subsp. aureus USA300; Staphylococcus aureus subsp. aureus USA300_FPR3757	3	4	0	2604
Staphylococcus aureus subsp. aureus USA300_TCH1516	Bacteria; Firmicutes; Bacilli; Bacillales; Staphylococcaceae; Staphylococcus; Staphylococcus aureus; Staphylococcus aureus subsp. aureus; Staphylococcus aureus subsp. aureus USA300; Staphylococcus aureus subsp. aureus USA300_TCH1516	3	4	0	2693
Staphylococcus aureus subsp. aureus VC40	Bacteria; Firmicutes; Bacilli; Bacillales; Staphylococcaceae; Staphylococcus; Staphylococcus aureus; Staphylococcus aureus subsp. aureus; Staphylococcus aureus subsp. aureus VC40	2	3	0	2468
Staphylococcus carnosus subsp. carnosus TM300	Bacteria; Firmicutes; Bacilli; Bacillales; Staphylococcaceae; Staphylococcus; Staphylococcus carnosus; Staphylococcus carnosus subsp. carnosus; Staphylococcus carnosus subsp. carnosus TM300	2	4	0	2461
Staphylococcus epidermidis ATCC 12228	Bacteria; Firmicutes; Bacilli; Bacillales; Staphylococcaceae; Staphylococcus; Staphylococcus epidermidis; Staphylococcus epidermidis ATCC 12228	1	4	0	2482
Staphylococcus epidermidis RP62A	Bacteria; Firmicutes; Bacilli; Bacillales; Staphylococcaceae; Staphylococcus; Staphylococcus epidermidis; Staphylococcus epidermidis RP62A	1	4	0	2525
Staphylococcus haemolyticus JCSC1435	Bacteria; Firmicutes; Bacilli; Bacillales; Staphylococcaceae; Staphylococcus; Staphylococcus haemolyticus; Staphylococcus haemolyticus JCSC1435	3	4	0	2692
Staphylococcus lugdunensis HKU09-01	Bacteria; Firmicutes; Bacilli; Bacillales; Staphylococcaceae; Staphylococcus; Staphylococcus lugdunensis; Staphylococcus lugdunensis HKU09-01	2	4	0	2490
Staphylococcus lugdunensis N920143	Bacteria; Firmicutes; Bacilli; Bacillales; Staphylococcaceae; Staphylococcus; Staphylococcus lugdunensis; Staphylococcus lugdunensis N920143	2	4	0	2425
Staphylococcus pseudintermedius ED99	Bacteria; Firmicutes; Bacilli; Bacillales; Staphylococcaceae; Staphylococcus; Staphylococcus pseudintermedius; Staphylococcus pseudintermedius ED99	2	4	0	2356
Staphylococcus pseudintermedius HKU10-03	Bacteria; Firmicutes; Bacilli; Bacillales; Staphylococcaceae; Staphylococcus; Staphylococcus pseudintermedius; Staphylococcus pseudintermedius HKU10-03	3	4	0	2450
Staphylococcus saprophyticus subsp. saprophyticus ATCC 15305	Bacteria; Firmicutes; Bacilli; Bacillales; Staphylococcaceae; Staphylococcus; Staphylococcus saprophyticus; Staphylococcus saprophyticus subsp. saprophyticus; Staphylococcus saprophyticus subsp. saprophyticus ATCC 15305	2	4	0	2514
Starkeya novella DSM 506	Bacteria; Proteobacteria; Alphaproteobacteria; Rhizobiales; Xanthobacteraceae; Starkeya; Starkeya novella; Starkeya novella DSM 506	2	22	2	4431
Stenotrophomonas maltophilia D457	Bacteria; Proteobacteria; Gammaproteobacteria; Xanthomonadales; Xanthomonadaceae; Stenotrophomonas; Stenotrophomonas maltophilia group; Stenotrophomonas maltophilia; Stenotrophomonas maltophilia D457	2	26	3	4101
Stenotrophomonas maltophilia JV3	Bacteria; Proteobacteria; Gammaproteobacteria; Xanthomonadales; Xanthomonadaceae; Stenotrophomonas; Stenotrophomonas maltophilia group; Stenotrophomonas maltophilia; Stenotrophomonas maltophilia JV3	2	29	4	4063
Stenotrophomonas maltophilia K279a	Bacteria; Proteobacteria; Gammaproteobacteria; Xanthomonadales; Xanthomonadaceae; Stenotrophomonas; Stenotrophomonas maltophilia group; Stenotrophomonas maltophilia; Stenotrophomonas maltophilia K279a	2	27	7	4386
Stenotrophomonas maltophilia R551-3	Bacteria; Proteobacteria; Gammaproteobacteria; Xanthomonadales; Xanthomonadaceae; Stenotrophomonas; Stenotrophomonas maltophilia group; Stenotrophomonas maltophilia; Stenotrophomonas maltophilia R551-3	2	29	3	4039
Stigmatella aurantiaca DW4/3-1	Bacteria; Proteobacteria; delta/epsilon subdivisions; Deltaproteobacteria; Myxococcales; Cystobacterineae; Cystobacteraceae; Stigmatella; Stigmatella aurantiaca; Stigmatella aurantiaca DW4/3-1	35	180	4	8543
Streptobacillus moniliformis DSM 12112	Bacteria; Fusobacteria; Fusobacteriia; Fusobacteriales; Leptotrichiaceae; Streptobacillus; Streptobacillus moniliformis; Streptobacillus moniliformis DSM 12112	1	7	1	1442
Streptococcus agalactiae 2603V/R	Bacteria; Firmicutes; Bacilli; Lactobacillales; Streptococcaceae; Streptococcus; Streptococcus agalactiae; Streptococcus agalactiae serogroup V; Streptococcus agalactiae 2603V/R	2	2	0	2124
Streptococcus agalactiae A909	Bacteria; Firmicutes; Bacilli; Lactobacillales; Streptococcaceae; Streptococcus; Streptococcus agalactiae; Streptococcus agalactiae serogroup Ia; Streptococcus agalactiae A909	2	2	0	1996
Streptococcus agalactiae NEM316	Bacteria; Firmicutes; Bacilli; Lactobacillales; Streptococcaceae; Streptococcus; Streptococcus agalactiae; Streptococcus agalactiae serogroup III; Streptococcus agalactiae NEM316	1	2	0	2094
Streptococcus dysgalactiae subsp. equisimilis ATCC 12394	Bacteria; Firmicutes; Bacilli; Lactobacillales; Streptococcaceae; Streptococcus; Streptococcus dysgalactiae group; Streptococcus dysgalactiae; Streptococcus dysgalactiae subsp. equisimilis; Streptococcus dysgalactiae subsp. equisimilis ATCC 12394	1	2	0	2056
Streptococcus dysgalactiae subsp. equisimilis GGS_124	Bacteria; Firmicutes; Bacilli; Lactobacillales; Streptococcaceae; Streptococcus; Streptococcus dysgalactiae group; Streptococcus dysgalactiae; Streptococcus dysgalactiae subsp. equisimilis; Streptococcus dysgalactiae subsp. equisimilis GGS_124	2	2	0	2094
Streptococcus equi subsp. equi 4047	Bacteria; Firmicutes; Bacilli; Lactobacillales; Streptococcaceae; Streptococcus; Streptococcus dysgalactiae group; Streptococcus equi; Streptococcus equi subsp. equi; Streptococcus equi subsp. equi 4047	1	1	0	2000
Streptococcus equi subsp. zooepidemicus	Bacteria; Firmicutes; Bacilli; Lactobacillales; Streptococcaceae; Streptococcus; Streptococcus dysgalactiae group; Streptococcus equi; Streptococcus equi subsp. zooepidemicus	0	1	0	1869
Streptococcus equi subsp. zooepidemicus MGCS10565	Bacteria; Firmicutes; Bacilli; Lactobacillales; Streptococcaceae; Streptococcus; Streptococcus dysgalactiae group; Streptococcus equi; Streptococcus equi subsp. zooepidemicus; Streptococcus equi subsp. zooepidemicus MGCS10565	0	2	0	2087
Streptococcus gallolyticus subsp. gallolyticus ATCC 43143	Bacteria; Firmicutes; Bacilli; Lactobacillales; Streptococcaceae; Streptococcus; Streptococcus gallolyticus; Streptococcus gallolyticus subsp. gallolyticus; Streptococcus gallolyticus subsp. gallolyticus ATCC 43143	0	2	0	2246
Streptococcus gallolyticus subsp. gallolyticus ATCC BAA-2069	Bacteria; Firmicutes; Bacilli; Lactobacillales; Streptococcaceae; Streptococcus; Streptococcus gallolyticus; Streptococcus gallolyticus subsp. gallolyticus; Streptococcus gallolyticus subsp. gallolyticus ATCC BAA-2069	0	2	0	2329
Streptococcus gallolyticus UCN34	Bacteria; Firmicutes; Bacilli; Lactobacillales; Streptococcaceae; Streptococcus; Streptococcus gallolyticus; Streptococcus gallolyticus subsp. gallolyticus; Streptococcus gallolyticus UCN34	1	2	0	2223
Streptococcus gordonii str. Challis substr. CH1	Bacteria; Firmicutes; Bacilli; Lactobacillales; Streptococcaceae; Streptococcus; Streptococcus gordonii; Streptococcus gordonii str. Challis; Streptococcus gordonii str. Challis substr. CH1	1	3	0	2051
Streptococcus infantarius subsp. infantarius CJ18	Bacteria; Firmicutes; Bacilli; Lactobacillales; Streptococcaceae; Streptococcus; Streptococcus infantarius; Streptococcus infantarius subsp. infantarius; Streptococcus infantarius subsp. infantarius CJ18	1	2	0	1906
Streptococcus intermedius JTH08	Bacteria; Firmicutes; Bacilli; Lactobacillales; Streptococcaceae; Streptococcus; Streptococcus anginosus group; Streptococcus intermedius; Streptococcus intermedius JTH08	2	2	0	1702
Streptococcus macedonicus ACA-DC 198	Bacteria; Firmicutes; Bacilli; Lactobacillales; Streptococcaceae; Streptococcus; Streptococcus macedonicus; Streptococcus macedonicus ACA-DC 198	0	2	0	1994
Streptococcus mitis B6	Bacteria; Firmicutes; Bacilli; Lactobacillales; Streptococcaceae; Streptococcus; Streptococcus mitis; Streptococcus mitis B6	2	3	0	2004
Streptococcus mutans GS-5	Bacteria; Firmicutes; Bacilli; Lactobacillales; Streptococcaceae; Streptococcus; Streptococcus mutans; Streptococcus mutans GS-5	1	1	0	1878
Streptococcus mutans LJ23	Bacteria; Firmicutes; Bacilli; Lactobacillales; Streptococcaceae; Streptococcus; Streptococcus mutans; Streptococcus mutans LJ23	2	1	0
Streptococcus mutans NN2025	Bacteria; Firmicutes; Bacilli; Lactobacillales; Streptococcaceae; Streptococcus; Streptococcus mutans; Streptococcus mutans NN2025	2	1	0	1895
Streptococcus mutans UA159	Bacteria; Firmicutes; Bacilli; Lactobacillales; Streptococcaceae; Streptococcus; Streptococcus mutans; Streptococcus mutans UA159	2	1	0	1960
Streptococcus oralis Uo5	Bacteria; Firmicutes; Bacilli; Lactobacillales; Streptococcaceae; Streptococcus; Streptococcus oralis; Streptococcus oralis Uo5	2	2	0	1907
Streptococcus parasanguinis ATCC 15912	Bacteria; Firmicutes; Bacilli; Lactobacillales; Streptococcaceae; Streptococcus; Streptococcus parasanguinis; Streptococcus parasanguinis ATCC 15912	1	3	1	2022
Streptococcus parasanguinis FW213	Bacteria; Firmicutes; Bacilli; Lactobacillales; Streptococcaceae; Streptococcus; Streptococcus parasanguinis; Streptococcus parasanguinis FW213	2	2	1	2019
Streptococcus parauberis KCTC 11537	Bacteria; Firmicutes; Bacilli; Lactobacillales; Streptococcaceae; Streptococcus; Streptococcus parauberis; Streptococcus parauberis KCTC 11537	1	2	0	1868
Streptococcus pasteurianus ATCC 43144	Bacteria; Firmicutes; Bacilli; Lactobacillales; Streptococcaceae; Streptococcus; Streptococcus pasteurianus; Streptococcus pasteurianus ATCC 43144	2	1	0	1869
Streptococcus pneumoniae 670-6B	Bacteria; Firmicutes; Bacilli; Lactobacillales; Streptococcaceae; Streptococcus; Streptococcus pneumoniae; Streptococcus pneumoniae 670-6B	4	3	0	2352
Streptococcus pneumoniae 70585	Bacteria; Firmicutes; Bacilli; Lactobacillales; Streptococcaceae; Streptococcus; Streptococcus pneumoniae; Streptococcus pneumoniae 70585	2	1	0	2202
Streptococcus pneumoniae AP200	Bacteria; Firmicutes; Bacilli; Lactobacillales; Streptococcaceae; Streptococcus; Streptococcus pneumoniae; Streptococcus pneumoniae AP200	2	2	0	2216
Streptococcus pneumoniae ATCC 700669	Bacteria; Firmicutes; Bacilli; Lactobacillales; Streptococcaceae; Streptococcus; Streptococcus pneumoniae; Streptococcus pneumoniae ATCC 700669	0	2	0	1990
Streptococcus pneumoniae CGSP14	Bacteria; Firmicutes; Bacilli; Lactobacillales; Streptococcaceae; Streptococcus; Streptococcus pneumoniae; Streptococcus pneumoniae CGSP14	2	2	0	2206
Streptococcus pneumoniae D39	Bacteria; Firmicutes; Bacilli; Lactobacillales; Streptococcaceae; Streptococcus; Streptococcus pneumoniae; Streptococcus pneumoniae D39	1	2	0	1914
Streptococcus pneumoniae G54	Bacteria; Firmicutes; Bacilli; Lactobacillales; Streptococcaceae; Streptococcus; Streptococcus pneumoniae; Streptococcus pneumoniae G54	1	1	0	2114
Streptococcus pneumoniae Hungary19A-6	Bacteria; Firmicutes; Bacilli; Lactobacillales; Streptococcaceae; Streptococcus; Streptococcus pneumoniae; Streptococcus pneumoniae Hungary19A-6	0	2	0	2155
Streptococcus pneumoniae INV104	Bacteria; Firmicutes; Bacilli; Lactobacillales; Streptococcaceae; Streptococcus; Streptococcus pneumoniae; Streptococcus pneumoniae INV104	0	1	0	1820
Streptococcus pneumoniae INV200	Bacteria; Firmicutes; Bacilli; Lactobacillales; Streptococcaceae; Streptococcus; Streptococcus pneumoniae; Streptococcus pneumoniae INV200	2	2	0	1929
Streptococcus pneumoniae JJA	Bacteria; Firmicutes; Bacilli; Lactobacillales; Streptococcaceae; Streptococcus; Streptococcus pneumoniae; Streptococcus pneumoniae JJA	2	2	0	2123
Streptococcus pneumoniae OXC141	Bacteria; Firmicutes; Bacilli; Lactobacillales; Streptococcaceae; Streptococcus; Streptococcus pneumoniae; Streptococcus pneumoniae OXC141	1	2	0	1823
Streptococcus pneumoniae P1031	Bacteria; Firmicutes; Bacilli; Lactobacillales; Streptococcaceae; Streptococcus; Streptococcus pneumoniae; Streptococcus pneumoniae P1031	2	2	0	2073
Streptococcus pneumoniae R6	Bacteria; Firmicutes; Bacilli; Lactobacillales; Streptococcaceae; Streptococcus; Streptococcus pneumoniae; Streptococcus pneumoniae R6	2	2	0	2042
Streptococcus pneumoniae ST556	Bacteria; Firmicutes; Bacilli; Lactobacillales; Streptococcaceae; Streptococcus; Streptococcus pneumoniae; Streptococcus pneumoniae ST556	2	1	0	2148
Streptococcus pneumoniae Taiwan19F-14	Bacteria; Firmicutes; Bacilli; Lactobacillales; Streptococcaceae; Streptococcus; Streptococcus pneumoniae; Streptococcus pneumoniae Taiwan19F-14	2	1	0	2044
Streptococcus pneumoniae TCH8431/19A	Bacteria; Firmicutes; Bacilli; Lactobacillales; Streptococcaceae; Streptococcus; Streptococcus pneumoniae; Streptococcus pneumoniae TCH8431/19A	2	1	0	2275
Streptococcus pneumoniae TIGR4	Bacteria; Firmicutes; Bacilli; Lactobacillales; Streptococcaceae; Streptococcus; Streptococcus pneumoniae; Streptococcus pneumoniae TIGR4	0	2	0	2105
Streptococcus pseudopneumoniae IS7493	Bacteria; Firmicutes; Bacilli; Lactobacillales; Streptococcaceae; Streptococcus; Streptococcus pseudopneumoniae; Streptococcus pseudopneumoniae IS7493	1	2	0	2236
Streptococcus pyogenes Alab49	Bacteria; Firmicutes; Bacilli; Lactobacillales; Streptococcaceae; Streptococcus; Streptococcus pyogenes; Streptococcus pyogenes serotype M53; Streptococcus pyogenes Alab49	1	2	0	1773
Streptococcus pyogenes M1 GAS	Bacteria; Firmicutes; Bacilli; Lactobacillales; Streptococcaceae; Streptococcus; Streptococcus pyogenes; Streptococcus pyogenes serotype M1; Streptococcus pyogenes M1 GAS	0	2	0	1696
Streptococcus pyogenes MGAS10270	Bacteria; Firmicutes; Bacilli; Lactobacillales; Streptococcaceae; Streptococcus; Streptococcus pyogenes; Streptococcus pyogenes serotype M2; Streptococcus pyogenes MGAS10270	0	3	0	1986
Streptococcus pyogenes MGAS10394	Bacteria; Firmicutes; Bacilli; Lactobacillales; Streptococcaceae; Streptococcus; Streptococcus pyogenes; Streptococcus pyogenes serotype M6; Streptococcus pyogenes MGAS10394	3	2	0	1886
Streptococcus pyogenes MGAS10750	Bacteria; Firmicutes; Bacilli; Lactobacillales; Streptococcaceae; Streptococcus; Streptococcus pyogenes; Streptococcus pyogenes serotype M4; Streptococcus pyogenes MGAS10750	1	2	0	1978
Streptococcus pyogenes MGAS15252	Bacteria; Firmicutes; Bacilli; Lactobacillales; Streptococcaceae; Streptococcus; Streptococcus pyogenes; Streptococcus pyogenes serotype M59; Streptococcus pyogenes MGAS15252	0	2	0	1662
Streptococcus pyogenes MGAS1882	Bacteria; Firmicutes; Bacilli; Lactobacillales; Streptococcaceae; Streptococcus; Streptococcus pyogenes; Streptococcus pyogenes MGAS1882	0	2	0	1691
Streptococcus pyogenes MGAS2096	Bacteria; Firmicutes; Bacilli; Lactobacillales; Streptococcaceae; Streptococcus; Streptococcus pyogenes; Streptococcus pyogenes serotype M12; Streptococcus pyogenes MGAS2096	1	2	0	1898
Streptococcus pyogenes MGAS315	Bacteria; Firmicutes; Bacilli; Lactobacillales; Streptococcaceae; Streptococcus; Streptococcus pyogenes; Streptococcus pyogenes serotype M3; Streptococcus pyogenes MGAS315	2	2	0	1865
Streptococcus pyogenes MGAS5005	Bacteria; Firmicutes; Bacilli; Lactobacillales; Streptococcaceae; Streptococcus; Streptococcus pyogenes; Streptococcus pyogenes serotype M1; Streptococcus pyogenes MGAS5005	1	2	0	1865
Streptococcus pyogenes MGAS6180	Bacteria; Firmicutes; Bacilli; Lactobacillales; Streptococcaceae; Streptococcus; Streptococcus pyogenes; Streptococcus pyogenes serotype M28; Streptococcus pyogenes MGAS6180	0	2	0	1894
Streptococcus pyogenes MGAS8232	Bacteria; Firmicutes; Bacilli; Lactobacillales; Streptococcaceae; Streptococcus; Streptococcus pyogenes; Streptococcus pyogenes serotype M18; Streptococcus pyogenes MGAS8232	0	2	0	1839
Streptococcus pyogenes MGAS9429	Bacteria; Firmicutes; Bacilli; Lactobacillales; Streptococcaceae; Streptococcus; Streptococcus pyogenes; Streptococcus pyogenes serotype M12; Streptococcus pyogenes MGAS9429	1	2	0	1877
Streptococcus pyogenes NZ131	Bacteria; Firmicutes; Bacilli; Lactobacillales; Streptococcaceae; Streptococcus; Streptococcus pyogenes; Streptococcus pyogenes serotype M49; Streptococcus pyogenes NZ131	1	2	0	1700
Streptococcus pyogenes SSI-1	Bacteria; Firmicutes; Bacilli; Lactobacillales; Streptococcaceae; Streptococcus; Streptococcus pyogenes; Streptococcus pyogenes serotype M3; Streptococcus pyogenes SSI-1	2	2	0	1859
Streptococcus pyogenes str. Manfredo	Bacteria; Firmicutes; Bacilli; Lactobacillales; Streptococcaceae; Streptococcus; Streptococcus pyogenes; Streptococcus pyogenes serotype M5; Streptococcus pyogenes str. Manfredo	1	2	0	1745
Streptococcus salivarius 57.I	Bacteria; Firmicutes; Bacilli; Lactobacillales; Streptococcaceae; Streptococcus; Streptococcus salivarius; Streptococcus salivarius 57.I	2	2	0	1996
Streptococcus salivarius CCHSS3	Bacteria; Firmicutes; Bacilli; Lactobacillales; Streptococcaceae; Streptococcus; Streptococcus salivarius; Streptococcus salivarius CCHSS3	2	2	0
Streptococcus salivarius JIM8777	Bacteria; Firmicutes; Bacilli; Lactobacillales; Streptococcaceae; Streptococcus; Streptococcus salivarius; Streptococcus salivarius JIM8777	1	2	0	1979
Streptococcus sanguinis SK36	Bacteria; Firmicutes; Bacilli; Lactobacillales; Streptococcaceae; Streptococcus; Streptococcus sanguinis; Streptococcus sanguinis SK36	2	2	2	2270
Streptococcus suis 05ZYH33	Bacteria; Firmicutes; Bacilli; Lactobacillales; Streptococcaceae; Streptococcus; Streptococcus suis; Streptococcus suis 05ZYH33	4	1	0	2186
Streptococcus suis 98HAH33	Bacteria; Firmicutes; Bacilli; Lactobacillales; Streptococcaceae; Streptococcus; Streptococcus suis; Streptococcus suis 98HAH33	4	1	0	2185
Streptococcus suis A7	Bacteria; Firmicutes; Bacilli; Lactobacillales; Streptococcaceae; Streptococcus; Streptococcus suis; Streptococcus suis A7	4	1	0	1974
Streptococcus suis BM407	Bacteria; Firmicutes; Bacilli; Lactobacillales; Streptococcaceae; Streptococcus; Streptococcus suis; Streptococcus suis BM407	2	1	0	1947
Streptococcus suis D12	Bacteria; Firmicutes; Bacilli; Lactobacillales; Streptococcaceae; Streptococcus; Streptococcus suis; Streptococcus suis D12	3	2	0	2078
Streptococcus suis D9	Bacteria; Firmicutes; Bacilli; Lactobacillales; Streptococcaceae; Streptococcus; Streptococcus suis; Streptococcus suis D9	2	2	0	2074
Streptococcus suis GZ1	Bacteria; Firmicutes; Bacilli; Lactobacillales; Streptococcaceae; Streptococcus; Streptococcus suis; Streptococcus suis GZ1	4	1	0	1977
Streptococcus suis JS14	Bacteria; Firmicutes; Bacilli; Lactobacillales; Streptococcaceae; Streptococcus; Streptococcus suis; Streptococcus suis JS14	4	1	0	2066
Streptococcus suis P1/7	Bacteria; Firmicutes; Bacilli; Lactobacillales; Streptococcaceae; Streptococcus; Streptococcus suis; Streptococcus suis P1/7	2	1	0	1824
Streptococcus suis SC84	Bacteria; Firmicutes; Bacilli; Lactobacillales; Streptococcaceae; Streptococcus; Streptococcus suis; Streptococcus suis SC84	2	1	0	1898
Streptococcus suis SS12	Bacteria; Firmicutes; Bacilli; Lactobacillales; Streptococcaceae; Streptococcus; Streptococcus suis; Streptococcus suis SS12	3	1	0	2079
Streptococcus suis ST1	Bacteria; Firmicutes; Bacilli; Lactobacillales; Streptococcaceae; Streptococcus; Streptococcus suis; Streptococcus suis ST1	3	1	0	1987
Streptococcus suis ST3	Bacteria; Firmicutes; Bacilli; Lactobacillales; Streptococcaceae; Streptococcus; Streptococcus suis; Streptococcus suis ST3	3	1	0	1952
Streptococcus thermophilus CNRZ1066	Bacteria; Firmicutes; Bacilli; Lactobacillales; Streptococcaceae; Streptococcus; Streptococcus thermophilus; Streptococcus thermophilus CNRZ1066	2	1	0	1915
Streptococcus thermophilus JIM 8232	Bacteria; Firmicutes; Bacilli; Lactobacillales; Streptococcaceae; Streptococcus; Streptococcus thermophilus; Streptococcus thermophilus JIM 8232	2	1	0	2145
Streptococcus thermophilus LMD-9	Bacteria; Firmicutes; Bacilli; Lactobacillales; Streptococcaceae; Streptococcus; Streptococcus thermophilus; Streptococcus thermophilus LMD-9	2	2	0	1715
Streptococcus thermophilus LMG 18311	Bacteria; Firmicutes; Bacilli; Lactobacillales; Streptococcaceae; Streptococcus; Streptococcus thermophilus; Streptococcus thermophilus LMG 18311	2	1	0	1888
Streptococcus thermophilus MN-ZLW-002	Bacteria; Firmicutes; Bacilli; Lactobacillales; Streptococcaceae; Streptococcus; Streptococcus thermophilus; Streptococcus thermophilus MN-ZLW-002	1	1	0	1910
Streptococcus thermophilus ND03	Bacteria; Firmicutes; Bacilli; Lactobacillales; Streptococcaceae; Streptococcus; Streptococcus thermophilus; Streptococcus thermophilus ND03	1	1	0	1919
Streptococcus uberis 0140J	Bacteria; Firmicutes; Bacilli; Lactobacillales; Streptococcaceae; Streptococcus; Streptococcus uberis; Streptococcus uberis 0140J	1	1	0	1762
Streptomyces avermitilis MA-4680	Bacteria; Actinobacteria; Actinobacteria; Actinobacteridae; Actinomycetales; Streptomycineae; Streptomycetaceae; Streptomyces; Streptomyces avermitilis; Streptomyces avermitilis MA-4680	4	53	2	7676
Streptomyces bingchenggensis BCW-1	Bacteria; Actinobacteria; Actinobacteria; Actinobacteridae; Actinomycetales; Streptomycineae; Streptomycetaceae; Streptomyces; Streptomyces bingchenggensis; Streptomyces bingchenggensis BCW-1	10	106	4	10022
Streptomyces cattleya NRRL 8057 = DSM 46488	Bacteria; Actinobacteria; Actinobacteria; Actinobacteridae; Actinomycetales; Streptomycineae; Streptomycetaceae; Streptomyces; Streptomyces cattleya; Streptomyces cattleya NRRL 8057 = DSM 46488	2	48	1	7569
Streptomyces cattleya NRRL 8057 = DSM 46488	Bacteria; Actinobacteria; Actinobacteria; Actinobacteridae; Actinomycetales; Streptomycineae; Streptomycetaceae; Streptomyces; Streptomyces cattleya; Streptomyces cattleya NRRL 8057 = DSM 46488	2	47	1	7475
Streptomyces coelicolor A3(2)	Bacteria; Actinobacteria; Actinobacteria; Actinobacteridae; Actinomycetales; Streptomycineae; Streptomycetaceae; Streptomyces; Streptomyces coelicolor; Streptomyces coelicolor A3(2)	7	59	3	8153
Streptomyces flavogriseus ATCC 33331	Bacteria; Actinobacteria; Actinobacteria; Actinobacteridae; Actinomycetales; Streptomycineae; Streptomycetaceae; Streptomyces; Streptomyces flavogriseus; Streptomyces flavogriseus ATCC 33331	10	48	6	6572
Streptomyces griseus subsp. griseus NBRC 13350	Bacteria; Actinobacteria; Actinobacteria; Actinobacteridae; Actinomycetales; Streptomycineae; Streptomycetaceae; Streptomyces; Streptomyces griseus group; Streptomyces griseus; Streptomyces griseus subsp. griseus; Streptomyces griseus subsp. griseus NBRC 13350	11	64	3	7136
Streptomyces hygroscopicus subsp. jinggangensis 5008	Bacteria; Actinobacteria; Actinobacteria; Actinobacteridae; Actinomycetales; Streptomycineae; Streptomycetaceae; Streptomyces; Streptomyces hygroscopicus; Streptomyces hygroscopicus subsp. jinggangensis; Streptomyces hygroscopicus subsp. jinggangensis 5008	9	84	2	9108
Streptomyces scabiei 87.22	Bacteria; Actinobacteria; Actinobacteria; Actinobacteridae; Actinomycetales; Streptomycineae; Streptomycetaceae; Streptomyces; Streptomyces scabiei; Streptomyces scabiei 87.22	7	62	5	8746
Streptomyces sp. SirexAA-E	Bacteria; Actinobacteria; Actinobacteria; Actinobacteridae; Actinomycetales; Streptomycineae; Streptomycetaceae; Streptomyces; Streptomyces sp. SirexAA-E	6	43	2	6357
Streptomyces violaceusniger Tu 4113	Bacteria; Actinobacteria; Actinobacteria; Actinobacteridae; Actinomycetales; Streptomycineae; Streptomycetaceae; Streptomyces; Streptomyces violaceusniger; Streptomyces violaceusniger Tu 4113	7	77	2	8985
Streptosporangium roseum DSM 43021	Bacteria; Actinobacteria; Actinobacteria; Actinobacteridae; Actinomycetales; Streptosporangineae; Streptosporangiaceae; Streptosporangium; Streptosporangium roseum; Streptosporangium roseum DSM 43021	9	92	5	8975
Sulfobacillus acidophilus DSM 10332	Bacteria; Firmicutes; Clostridia; Clostridiales; Clostridiales incertae sedis; Clostridiales Family XVII. Incertae Sedis; Sulfobacillus; Sulfobacillus acidophilus; Sulfobacillus acidophilus DSM 10332	0	13	0	3471
Sulfobacillus acidophilus TPY	Bacteria; Firmicutes; Clostridia; Clostridiales; Clostridiales incertae sedis; Clostridiales Family XVII. Incertae Sedis; Sulfobacillus; Sulfobacillus acidophilus; Sulfobacillus acidophilus TPY	0	13	0	3754
Sulfuricurvum kujiense DSM 16994	Bacteria; Proteobacteria; delta/epsilon subdivisions; Epsilonproteobacteria; Campylobacterales; Helicobacteraceae; Sulfuricurvum; Sulfuricurvum kujiense; Sulfuricurvum kujiense DSM 16994	1	16	5	2798
Sulfurihydrogenibium azorense Az-Fu1	Bacteria; Aquificae; Aquificae; Aquificales; Hydrogenothermaceae; Sulfurihydrogenibium; Sulfurihydrogenibium azorense; Sulfurihydrogenibium azorense Az-Fu1	1	18	0	1723
Sulfurihydrogenibium sp. YO3AOP1	Bacteria; Aquificae; Aquificae; Aquificales; Hydrogenothermaceae; Sulfurihydrogenibium; Sulfurihydrogenibium sp. YO3AOP1	2	18	0	1721
Sulfurimonas autotrophica DSM 16294	Bacteria; Proteobacteria; delta/epsilon subdivisions; Epsilonproteobacteria; Campylobacterales; Helicobacteraceae; Sulfurimonas; Sulfurimonas autotrophica; Sulfurimonas autotrophica DSM 16294	0	14	1	2158
Sulfurimonas denitrificans DSM 1251	Bacteria; Proteobacteria; delta/epsilon subdivisions; Epsilonproteobacteria; Campylobacterales; Helicobacteraceae; Sulfurimonas; Sulfurimonas denitrificans; Sulfurimonas denitrificans DSM 1251	0	13	1	2096
Sulfurospirillum barnesii SES-3	Bacteria; Proteobacteria; delta/epsilon subdivisions; Epsilonproteobacteria; Campylobacterales; Campylobacteraceae; Sulfurospirillum; Sulfurospirillum barnesii; Sulfurospirillum barnesii SES-3	0	14	1	2491
Sulfurospirillum deleyianum DSM 6946	Bacteria; Proteobacteria; delta/epsilon subdivisions; Epsilonproteobacteria; Campylobacterales; Campylobacteraceae; Sulfurospirillum; Sulfurospirillum deleyianum; Sulfurospirillum deleyianum DSM 6946	0	11	3	2265
Sulfurovum sp. NBC37-1	Bacteria; Proteobacteria; delta/epsilon subdivisions; Epsilonproteobacteria; unclassified Epsilonproteobacteria; Sulfurovum; Sulfurovum sp. NBC37-1	0	11	1	2438
Symbiobacterium thermophilum IAM 14863	Bacteria; Firmicutes; Clostridia; Clostridiales; Clostridiales incertae sedis; Clostridiales Family XVIII. Incertae Sedis; Symbiobacterium; Symbiobacterium thermophilum; Symbiobacterium thermophilum IAM 14863	2	17	0	3337
Synechococcus elongatus PCC 6301	Bacteria; Cyanobacteria; Chroococcales; Synechococcus; Synechococcus elongatus; Synechococcus elongatus PCC 6301	10	27	1	2523
Synechococcus elongatus PCC 7942	Bacteria; Cyanobacteria; Chroococcales; Synechococcus; Synechococcus elongatus; Synechococcus elongatus PCC 7942	13	27	1	2662
Synechococcus sp. CC9311	Bacteria; Cyanobacteria; Chroococcales; Synechococcus; Synechococcus sp. CC9311	12	11	0	2892
Synechococcus sp. CC9605	Bacteria; Cyanobacteria; Chroococcales; Synechococcus; Synechococcus sp. CC9605	9	13	1	2645
Synechococcus sp. CC9902	Bacteria; Cyanobacteria; Chroococcales; Synechococcus; Synechococcus sp. CC9902	12	15	0	2306
Synechococcus sp. JA-2-3B'a(2-13)	Bacteria; Cyanobacteria; Chroococcales; Synechococcus; Synechococcus sp. JA-2-3B'a(2-13)	9	34	2	2862
Synechococcus sp. JA-3-3Ab	Bacteria; Cyanobacteria; Chroococcales; Synechococcus; Synechococcus sp. JA-3-3Ab	7	32	2	2760
Synechococcus sp. PCC 7002	Bacteria; Cyanobacteria; Chroococcales; Synechococcus; Synechococcus sp. PCC 7002	9	37	1	3187
Synechococcus sp. RCC307	Bacteria; Cyanobacteria; Chroococcales; Synechococcus; Synechococcus sp. RCC307	11	16	0	2534
Synechococcus sp. WH 7803	Bacteria; Cyanobacteria; Chroococcales; Synechococcus; Synechococcus sp. WH 7803	9	16	0	2533
Synechococcus sp. WH 8102	Bacteria; Cyanobacteria; Chroococcales; Synechococcus; Synechococcus sp. WH 8102	9	16	0	2519
Synechocystis sp. PCC 6803	Bacteria; Cyanobacteria; Chroococcales; Synechocystis; Synechocystis sp. PCC 6803	10	31	1	3561
Synechocystis sp. PCC 6803	Bacteria; Cyanobacteria; Chroococcales; Synechocystis; Synechocystis sp. PCC 6803	9	31	1	3575
Synechocystis sp. PCC 6803 substr. GT-I	Bacteria; Cyanobacteria; Chroococcales; Synechocystis; Synechocystis sp. PCC 6803; Synechocystis sp. PCC 6803 substr. GT-I	9	31	1	3168
Synechocystis sp. PCC 6803 substr. PCC-N	Bacteria; Cyanobacteria; Chroococcales; Synechocystis; Synechocystis sp. PCC 6803; Synechocystis sp. PCC 6803 substr. PCC-N	9	31	1	3168
Synechocystis sp. PCC 6803 substr. PCC-P	Bacteria; Cyanobacteria; Chroococcales; Synechocystis; Synechocystis sp. PCC 6803; Synechocystis sp. PCC 6803 substr. PCC-P	9	31	1	3168
Syntrophobacter fumaroxidans MPOB	Bacteria; Proteobacteria; delta/epsilon subdivisions; Deltaproteobacteria; Syntrophobacterales; Syntrophobacteraceae; Syntrophobacter; Syntrophobacter fumaroxidans; Syntrophobacter fumaroxidans MPOB	7	37	3	4064
Syntrophobotulus glycolicus DSM 8271	Bacteria; Firmicutes; Clostridia; Clostridiales; Peptococcaceae; Syntrophobotulus; Syntrophobotulus glycolicus; Syntrophobotulus glycolicus DSM 8271	1	7	0	3251
Syntrophomonas wolfei subsp. wolfei str. Goettingen	Bacteria; Firmicutes; Clostridia; Clostridiales; Syntrophomonadaceae; Syntrophomonas; Syntrophomonas wolfei; Syntrophomonas wolfei subsp. wolfei; Syntrophomonas wolfei subsp. wolfei str. Goettingen	3	6	0	2504
Syntrophothermus lipocalidus DSM 12680	Bacteria; Firmicutes; Clostridia; Clostridiales; Syntrophomonadaceae; Syntrophothermus; Syntrophothermus lipocalidus; Syntrophothermus lipocalidus DSM 12680	1	11	0	2313
Syntrophus aciditrophicus SB	Bacteria; Proteobacteria; delta/epsilon subdivisions; Deltaproteobacteria; Syntrophobacterales; Syntrophaceae; Syntrophus; Syntrophus aciditrophicus; Syntrophus aciditrophicus SB	1	27	2	3166
Tannerella forsythia ATCC 43037	Bacteria; Bacteroidetes/Chlorobi group; Bacteroidetes; Bacteroidia; Bacteroidales; Porphyromonadaceae; Tannerella; Tannerella forsythia; Tannerella forsythia ATCC 43037	2	75	0	3001
Taylorella asinigenitalis MCE3	Bacteria; Proteobacteria; Betaproteobacteria; Burkholderiales; Alcaligenaceae; Taylorella; Taylorella asinigenitalis; Taylorella asinigenitalis MCE3	2	6	1	1524
Taylorella equigenitalis ATCC 35865	Bacteria; Proteobacteria; Betaproteobacteria; Burkholderiales; Alcaligenaceae; Taylorella; Taylorella equigenitalis; Taylorella equigenitalis ATCC 35865	11	8	2	1542
Taylorella equigenitalis MCE9	Bacteria; Proteobacteria; Betaproteobacteria; Burkholderiales; Alcaligenaceae; Taylorella; Taylorella equigenitalis; Taylorella equigenitalis MCE9	11	7	2	1556
Tepidanaerobacter acetatoxydans Re1	Bacteria; Firmicutes; Clostridia; Thermoanaerobacterales; Thermoanaerobacteraceae; Tepidanaerobacter; Tepidanaerobacter acetatoxydans; Tepidanaerobacter acetatoxydans Re1	3	5	0	3048
Teredinibacter turnerae T7901	Bacteria; Proteobacteria; Gammaproteobacteria; Alteromonadales; Alteromonadales genera incertae sedis; Teredinibacter; Teredinibacter turnerae; Teredinibacter turnerae T7901	1	40	3	4254
Terriglobus roseus DSM 18391	Bacteria; Fibrobacteres/Acidobacteria group; Acidobacteria; Acidobacteriia; Acidobacteriales; Acidobacteriaceae; Terriglobus; Terriglobus roseus; Terriglobus roseus DSM 18391	3	54	3	4245
Terriglobus saanensis SP1PR4	Bacteria; Fibrobacteres/Acidobacteria group; Acidobacteria; Acidobacteriia; Acidobacteriales; Acidobacteriaceae; Terriglobus; Terriglobus saanensis; Terriglobus saanensis SP1PR4	7	40	1	4180
Tetragenococcus halophilus NBRC 12172	Bacteria; Firmicutes; Bacilli; Lactobacillales; Enterococcaceae; Tetragenococcus; Tetragenococcus halophilus; Tetragenococcus halophilus NBRC 12172	3	2	1
Thauera sp. MZ1T	Bacteria; Proteobacteria; Betaproteobacteria; Rhodocyclales; Rhodocyclaceae; Thauera; Thauera sp. MZ1T	3	16	6	3978
Thermaerobacter marianensis DSM 12885	Bacteria; Firmicutes; Clostridia; Clostridiales; Clostridiales incertae sedis; Clostridiales Family XVII. Incertae Sedis; Thermaerobacter; Thermaerobacter marianensis; Thermaerobacter marianensis DSM 12885	1	3	1	2327
Thermanaerovibrio acidaminovorans DSM 6589	Bacteria; Synergistetes; Synergistia; Synergistales; Synergistaceae; Thermanaerovibrio; Thermanaerovibrio acidaminovorans; Thermanaerovibrio acidaminovorans DSM 6589	0	9	0	1738
Thermincola potens JR	Bacteria; Firmicutes; Clostridia; Clostridiales; Peptococcaceae; Thermincola; Thermincola potens; Thermincola potens JR	1	23	0	2949
Thermoanaerobacter brockii subsp. finnii Ako-1	Bacteria; Firmicutes; Clostridia; Thermoanaerobacterales; Thermoanaerobacteraceae; Thermoanaerobacter; Thermoanaerobacter brockii; Thermoanaerobacter brockii subsp. finnii; Thermoanaerobacter brockii subsp. finnii Ako-1	2	5	0	2209
Thermoanaerobacter italicus Ab9	Bacteria; Firmicutes; Clostridia; Thermoanaerobacterales; Thermoanaerobacteraceae; Thermoanaerobacter; Thermoanaerobacter italicus; Thermoanaerobacter italicus Ab9	2	9	0	2270
Thermoanaerobacter mathranii subsp. mathranii str. A3	Bacteria; Firmicutes; Clostridia; Thermoanaerobacterales; Thermoanaerobacteraceae; Thermoanaerobacter; Thermoanaerobacter mathranii; Thermoanaerobacter mathranii subsp. mathranii; Thermoanaerobacter mathranii subsp. mathranii str. A3	1	6	0	2159
Thermoanaerobacter pseudethanolicus ATCC 33223	Bacteria; Firmicutes; Clostridia; Thermoanaerobacterales; Thermoanaerobacteraceae; Thermoanaerobacter; Thermoanaerobacter pseudethanolicus; Thermoanaerobacter pseudethanolicus ATCC 33223	2	5	0	2239
[truncated: 596 more rows]
