# Supplementary material for: Tandem-repeat protein domains across the tree of life
Source: PeerJ. 2015 Jan 13;3:e732. doi: 10.7717/peerj.732 (PMC4304861; doi:10.7717/peerj.732)
Supplement: Table S2 — Lifestyle analysis of bacterial species with ≥0.2% ARM-containing proteins. [file peerj-03-732-s006.xlsx]

## Sheet: Sheet1
Strain	Lifestyle	SPECIES ave ARM Protein	SPECIES Total Protein	SPECIES % ARM Protein
Pirellula staleyi DSM 6068	Extracellular	46	4717	0.975196
Planctomyces brasiliensis DSM 5305	Extracellular	36	4750	0.757895
Planctomyces limnophilus DSM 3776	Extracellular	32	4258	0.751527
Taylorella equigenitalis ATCC 35865	Facultative	11	1549	0.71015
Isosphaera pallida ATCC 43644*		24	3722	0.644815
Trichodesmium erythraeum IMS101	Extracellular	28	4451	0.629072
Corallococcus coralloides DSM 2259	Extracellular	50	8033	0.622432
Myxococcus xanthus DK 1622	Extracellular	41	7316	0.560416
Myxococcus fulvus HW-1	Extracellular	40	7284	0.549149
Cyclobacterium marinum DSM 745	Facultative	25	5000	0.5
Sorangium cellulosum 'So ce 56'	Extracellular	46	9380	0.490405
Rickettsia felis URRWXCal2	Obligate	7	1512	0.462963
Synechococcus elongatus PCC 6301	Extracellular	11.5	2592.5	0.442354
Chlamydophila abortus S26/3	Obligate	4	932	0.429185
Candidatus Chloracidobacterium thermophilum B	Extracellular	13	3054	0.425671
Candidatus Nitrospira defluvii	Extracellular	18	4268	0.421743
Haliangium ochraceum DSM 14365	Extracellular	28	6719	0.416729
Stigmatella aurantiaca DW4/3-1	Extracellular	35	8543	0.409692
Chlamydophila caviae GPIC	Obligate	4	1005	0.39801
Chlamydophila felis Fe/C-56	Obligate	4	1013	0.394867
Nostoc punctiforme PCC 73102	Facultative	26	6689	0.388698
Dyadobacter fermentans DSM 18053	Extracellular	22	5719	0.384683
Gloeobacter violaceus PCC 7421	Extracellular	17	4430	0.383747
Thermosynechococcus elongatus BP-1	Extracellular	9	2476	0.363489
Chlamydophila psittaci 01DC11	Obligate	3.85714	1109.43	0.351965
Anabaena variabilis ATCC 29413	Extracellular	19	5710	0.33275
Chlamydia trachomatis 434/Bu	Obligate	3	902.714	0.332702
Candidatus Solibacter usitatus Ellin6076	Extracellular	26	7826	0.332226
Chlamydia muridarum Nigg	Obligate	3	910	0.32967
Mycoplasma arthritidis 158L3-1	Obligate	2	631	0.316957
Rhodopirellula baltica SH 1	Extracellular	23	7325	0.313993
Runella slithyformis DSM 19594	Extracellular	18	5774	0.311742
Rickettsia japonica YH	Obligate	3	971	0.30896
Cyanothece sp. ATCC 51142	Extracellular	16.3333	5299	0.307403
Chlamydophila pecorum E58	Obligate	3	988	0.303644
Candidatus Amoebophilus asiaticus 5a2	Obligate	4	1334	0.29985
Treponema paraluiscuniculi Cuniculi A	Facultative	3	1010	0.29703
Chloroflexus aggregans DSM 9485	Extracellular	11	3731	0.294827
Treponema pallidum subsp. pallidum DAL-1	Facultative	3	1042.29	0.288054
Chloroflexus aurantiacus J-10-fl	Extracellular	11	3853	0.285492
Gemmatimonas aurantiaca T-27	Extracellular	11	3935	0.279543
Synechocystis sp. PCC 6803	Extracellular	9.2	3328	0.276968
Chlamydophila pneumoniae AR39	Obligate	3	1091.6	0.274988
'Nostoc azollae' 0708	Facultative	10	3651	0.273898
Spirochaeta thermophila DSM 6192	Extracellular	6	2233.5	0.268687
Thermoanaerobacterium xylanolyticum LX-11	Extracellular	6	2345	0.255864
Dehalococcoides ethenogenes 195	Extracellular	4	1580	0.253165
Anaerolinea thermophila UNI-1	Extracellular	8	3166	0.252685
Listeria welshimeri serovar 6b str. SLCC5334	Extracellular	7	2774	0.252343
Thermodesulfobacterium sp. OPB45	Extracellular	4	1596	0.250627
Anaeromyxobacter dehalogenans 2CP-1	Extracellular	11	4409.5	0.249186
Filifactor alocis ATCC 35896	Facultative	4	1641	0.243754
Leptospira interrogans serovar Copenhageni str. Fiocruz L1-130	Facultative	9	3693.33	0.243689
Rickettsia bellii OSU 85-389	Obligate	3.5	1452	0.240562
Leptospira borgpetersenii serovar Hardjo-bovis str. JB197	Facultative	7	2912.5	0.240373
Thermoanaerobacter wiegelii Rt8.B1	Extracellular	6	2522	0.237906
Haliscomenobacter hydrossis DSM 1100	Extracellular	16	6752	0.236967
Treponema denticola ATCC 35405	Facultative	6	2533	0.236873
Candidatus Desulforudis audaxviator MP104C	Extracellular	5	2157	0.231803
Rickettsia heilongjiangensis 054	Obligate	3	1297	0.231303
Desulfatibacillum alkenivorans AK-01	Extracellular	12	5252	0.228484
Herpetosiphon aurantiacus DSM 785	Extracellular	12	5279	0.227316
Kitasatospora setae KM-6054	Extracellular	17	7566	0.224689
Atopobium parvulum DSM 20469	Facultative	3	1353	0.221729
Mycoplasma fermentans JER	Obligate	2	923.5	0.220709
Candidatus Rickettsia amblyommii str. GAT-30V	Obligate	3	1390	0.215827
Spirochaeta caldaria DSM 7334	Extracellular	6	2789	0.215131
Acaryochloris marina MBIC11017	Facultative	18	8383	0.21472
Desulfococcus oleovorans Hxd3	Extracellular	7	3265	0.214395
Brachyspira murdochii DSM 12563	Facultative	6	2809	0.213599
Spirochaeta smaragdinae DSM 11293	Extracellular	9	4219	0.213321
Phycisphaera mikurensis NBRC 102666	Extracellular	7	3282	0.213285
Capnocytophaga canimorsus Cc5	Facultative	5	2404	0.207987
Geobacter sulfurreducens KN400	Extracellular	7	3378	0.207276
Maribacter sp. HTCC2170	Extracellular	7	3411	0.205218
* species removed from analysis due to inconclusive lifestyle determination
