# Supplementary material for: Tandem-repeat protein domains across the tree of life
Source: PeerJ. 2015 Jan 13;3:e732. doi: 10.7717/peerj.732 (PMC4304861; doi:10.7717/peerj.732)
Supplement: Table S5 — Bacterial species known to contain TPR domain containing virulence factors. [file peerj-03-732-s009.xlsx]

## Sheet: Sheet1
Strain	# TPR Proteins	% TPR Protein
Francisella novicida	4	0.217886
Shigella flexneri	13	0.300842
Shigella sonnei	10.5	0.211601
Pseudomonas aeruginosa	24	0.405264
Francisella tularensis	3.5	0.217723
Porphyromonas gingivalis	26.3333	1.27827
Mycobacterium tuberculosis	6.85714	0.175307
Yersinia enterocolitica	21.3333	0.511401
Yersinia pestis	17.6667	0.436016
Yersinia pseudotuberculosis	18.75	0.447349
Shigella boydii	7.5	0.173071
Shigella dysenteriae	5	0.111086
ALL species average	23.8008	0.657529
