# Supplementary material for: Tandem-repeat protein domains across the tree of life
Source: PeerJ. 2015 Jan 13;3:e732. doi: 10.7717/peerj.732 (PMC4304861; doi:10.7717/peerj.732)
Supplement: Table S6 — Distribution of ARM domain families across bacterial classes. [file peerj-03-732-s010.xlsx]

## Sheet: Sheet1
Strain	Class	Armadillo repeat	B56-like	BC3264-like	Clathrin adaptor core protein	Clathrin heavy-chain linker domain	GUN4-associated domain	HEAT repeat	HspBP1 domain	Leucine-rich repeat variant	MIF4G domain-like	Mo25 protein	PBS lyase HEAT-like repeat	PHAT domain	Phoshoinositide 3-kinase (PI3K) helical domain	Plakophilin 1 helical region	Pumilio repeat	RPA1889-like	Total domain #
Corallococcus coralloides DSM 2259	Deltaproteobacteria	1		2	3		5	1		5			40					6	63
Pirellula staleyi DSM 6068	Planctomycetia	6		2			3	1		5			30			2	1	1	51
Trichodesmium erythraeum IMS101	Chroobacteria	1			2		2	2	1	2			27						37
Nostoc punctiforme PCC 73102	Nostocales	4			2		1	1		2			20	1					31
Candidatus Solibacter usitatus Ellin6076	Acidobacteria	3		1	3		1			2			21						31
Cyclobacterium marinum DSM 745	Cytophagia	3		2	3		1						19						28
Candidatus Nitrospira defluvii	Nitrospira	1			1								16						18
Kitasatospora setae KM-6054	Actinobacteria	3			1		3	1	1	7			4						20
Gloeobacter violaceus PCC 7421	Gloeobacteria			1	2		1						13						17
Haliscomenobacter hydrossis DSM 1100	Sphingobacteriia	1		2	1		1			1			10						16
Roseiflexus sp. RS-1	Chloroflexi				1			2					11					1	15
Bacillus cereus AH820	Bacilli	1		3			2				1		5						12
Gemmatimonas aurantiaca T-27	Gemmatimonadetes			1				1		2			11						15
Taylorella equigenitalis ATCC 35865	Betaproteobacteria			1						11			1						13
Hahella chejuensis KCTC 2396	Gammaproteobacteria	1		1	1		1	1	1				6						12
Zobellia galactanivorans	Flavobacteriia				1						1		7						9
Leptospira interrogans serovar Copenhageni str. Fiocruz L1-130	Spirochaetia	1		2	2								4				1		10
Anaerolinea thermophila UNI-1	Anaerolineae				1			1	1			1	5		1				10
Alkaliphilus metalliredigens QYMF	Clostridia	2			1		1						3						7
Phycisphaera mikurensis NBRC 102666	Phycisphaerae				1	2		1		1			5						10
Magnetococcus marinus MC-1	Alphaproteobacteria	1											5						6
Prochlorococcus marinus subsp. marinus str. CCMP1375	Prochlorales						1			4			3						8
Parachlamydia acanthamoebae UV-7	Chlamydiae	1			1		1				1		2						6
Coraliomargarita akajimensis DSM 45221	Verrucomicrobia				3			1		1			5						10
